# Supplementary material for: Gene Expression Profile of Adult Human Olfactory Bulb and Embryonic Neural Stem Cell Suggests Distinct Signaling Pathways and Epigenetic Control
Source: PLoS One. 2012 Apr 2;7(4):e33542. doi: 10.1371/journal.pone.0033542 (PMC3317670; doi:10.1371/journal.pone.0033542)
Supplement: Table S4 — Normalized microarray data of 47232 Illumina probe sets demonstrating the gene expression profile of adult human olfactory bulb NSCs (OBNSCs), and human embryonic NSCs. (XLSX) [file pone.0033542.s012.xlsx]

## Sheet: OBNSC
PROBE_ID	SYMBOL	OB1 P20.Detection Pval	Ob2 P20.Detection Pval	OB1 P25.Detection Pval	OB1 P9.Detection Pval	OB2 P9.Detection Pval
ILMN_2061446	AADACL1	0	0	0	0	0	5
ILMN_1699334	AATK	0	0	0	0	0.0025974	5
ILMN_1781999	ABCF2	0	0	0	0	0	5
ILMN_1778104	ACADM	0.0012987	0	0	0	0.0038961	5
ILMN_2371379	ACLY	0	0	0	0	0	5
ILMN_1777296	ACTB	0	0	0	0	0	5
ILMN_1658660	ACTC1	0	0	0	0	0	5
ILMN_1704961	ACTG1	0	0	0	0	0	5
ILMN_1798254	ACTR10	0	0	0	0	0	5
ILMN_1792314	ACTR1A	0	0	0	0	0	5
ILMN_1815392	ACTRT1	0.025974	0.0103896	0	0	0	5
ILMN_1697550	ACYP2	0.0012987	0.0285714	0.0272727	0	0.0012987	5
ILMN_1799728	ADAM15	0	0	0	0	0.00909091	5
ILMN_1759252	ADD1	0	0	0	0	0	5
ILMN_2224833	ADIPOR2	0	0	0	0	0.0376623	5
ILMN_2389013	ADRM1	0	0.0012987	0	0.0025974	0.0012987	5
ILMN_2402766	AFTPH	0	0	0	0	0	5
ILMN_2269136	AGAP3	0.025974	0	0	0	0	5
ILMN_1770454	AGRN	0	0	0.0012987	0	0	5
ILMN_1712786	AHCYL2	0	0	0	0.0025974	0	5
ILMN_2148847	AKIRIN2	0	0	0	0	0	5
ILMN_1728047	AKR1A1	0	0	0	0	0	5
ILMN_1782939	ALB	0	0.0272727	0	0	0.0181818	5
ILMN_1763461	ALDH7A1	0	0	0	0.00779221	0.00519481	5
ILMN_1741148	ALDOA	0	0	0	0	0	5
ILMN_1761456	ALG13	0	0	0	0	0	5
ILMN_1685413	ALG8	0	0	0	0	0	5
ILMN_3236443	ALX1	0.00909091	0.0012987	0	0.0116883	0.0103896	5
ILMN_1667994	AMD1	0	0	0	0	0	5
ILMN_1770378	ANAPC10	0	0	0	0	0.00519481	5
ILMN_1765091	ANKHD1	0	0	0	0	0.0012987	5
ILMN_1794070	ANKRD13B	0	0	0.00909091	0.0116883	0.0103896	5
ILMN_2132599	ANKRD22	0.012987	0	0.0272727	0.0012987	0.0103896	5
ILMN_2145153	ANKRD35	0.0012987	0.0116883	0.00649351	0.0116883	0.00649351	5
ILMN_1758846	ANKRD40	0.0012987	0.0012987	0	0	0.0012987	5
ILMN_1669259	ANKRD49	0	0	0	0	0	5
ILMN_1809957	AP2S1	0	0	0	0	0	5
ILMN_2311761	AP3S1	0	0	0	0	0	5
ILMN_1718023	APEH	0	0	0	0	0	5
ILMN_1661886	APEX1	0	0	0	0	0	5
ILMN_1793598	APIP	0	0	0	0	0	5
ILMN_2296950	APOBEC3F	0	0	0	0	0	5
ILMN_2404065	APP	0.0207792	0	0.0012987	0	0	5
ILMN_1763730	APPL1	0	0	0	0.0025974	0.00649351	5
ILMN_1765076	APPL2	0.0493507	0	0.0441558	0.0181818	0.0038961	5
ILMN_1722491	APRT	0	0	0	0	0	5
ILMN_1723884	ARF4	0	0	0	0	0	5
ILMN_1719518	ARF4	0	0	0	0	0	5
ILMN_1752340	ARF5	0	0	0	0	0	5
ILMN_1769250	ARFGAP2	0	0	0	0	0	5
ILMN_1811592	ARHGAP21	0	0	0	0	0	5
ILMN_2405129	ARHGEF1	0	0.00519481	0	0	0.00909091	5
ILMN_1797341	ARID1A	0	0	0	0	0	5
ILMN_1696956	ARID3B	0.0025974	0.0285714	0.00649351	0.00909091	0.038961	5
ILMN_1694219	ARIH1	0	0	0	0	0	5
ILMN_1791149	ARL6IP4	0	0	0	0	0	5
ILMN_1781151	ARMC8	0	0	0	0	0	5
ILMN_2183510	ARMET	0	0	0.0012987	0.0116883	0	5
ILMN_2085760	ARPC1B	0	0.0012987	0.0363636	0	0	5
ILMN_1810200	ARPC2	0	0.00519481	0.0376623	0	0.00519481	5
ILMN_1782032	ASH1L	0	0	0	0	0	5
ILMN_1796417	ASNS	0	0	0	0	0	5
ILMN_2221673	ASNSD1	0	0	0	0	0	5
ILMN_2395451	ASS1	0	0	0	0	0	5
ILMN_1726025	ASXL1	0.00519481	0.00519481	0.0038961	0	0.00779221	5
ILMN_3273641	ATF6B	0	0	0.0103896	0	0	5
ILMN_1725707	ATG16L1	0	0	0	0	0	5
ILMN_1716384	ATL2	0	0	0	0	0	5
ILMN_1737833	ATN1	0	0.0181818	0	0.0025974	0.00649351	5
ILMN_1731783	ATP1A1	0	0	0	0	0	5
ILMN_2415189	ATP1A1	0	0	0	0	0	5
ILMN_1730291	ATP1B1	0	0	0	0	0	5
ILMN_1655884	ATP2A2	0	0	0	0	0	5
ILMN_2340565	ATP2C1	0	0	0	0	0	5
ILMN_1764494	ATP5A1	0	0.00779221	0.0454546	0.0103896	0.00649351	5
ILMN_1756674	ATP5EP2	0	0	0	0	0	5
ILMN_2348093	ATP5J	0	0.00519481	0	0	0.0038961	5
ILMN_1812638	ATP5L	0	0	0	0	0	5
ILMN_2353642	ATP6V0B	0	0	0	0	0	5
ILMN_1711516	ATP6V1A	0	0	0	0	0	5
ILMN_2099783	ATP6V1F	0	0	0	0	0	5
ILMN_2403730	ATP6V1H	0	0	0	0	0	5
ILMN_3233871	ATXN1L	0	0	0	0	0	5
ILMN_2271627	ATXN2L	0	0	0	0	0.0038961	5
ILMN_1664177	ATXN7L2	0	0	0	0	0	5
ILMN_1862018	ATXN7L3	0	0	0	0	0	5
ILMN_2231911	AUH	0	0	0	0	0	5
ILMN_1698324	AVPR2	0	0	0	0.0025974	0	5
ILMN_1703123	AXUD1	0	0	0	0	0	5
ILMN_1773109	BAI2	0	0	0	0	0	5
ILMN_1651826	BASP1	0	0	0	0	0	5
ILMN_1760563	BAT2	0	0	0	0	0	5
ILMN_2408179	BAT2	0	0	0	0	0	5
ILMN_1743137	BAT2D1	0	0	0	0	0	5
ILMN_1705364	BAT3	0	0	0	0	0	5
ILMN_2390416	BAT3	0	0	0	0	0	5
ILMN_2321064	BAX	0	0	0	0	0	5
ILMN_1720850	BAZ2B	0	0	0	0	0	5
ILMN_1729645	BBC3	0	0	0	0	0	5
ILMN_1732154	BCAN	0	0	0	0	0	5
ILMN_1771966	BCCIP	0	0	0	0	0	5
ILMN_1655433	BCKDHB	0	0	0	0.0116883	0	5
ILMN_2363250	BCL2	0	0	0	0	0	5
ILMN_1654118	BCL2L1	0	0	0	0	0	5
ILMN_2359627	BCL2L11	0.0012987	0.0194805	0.0311688	0.0012987	0.0428571	5
ILMN_1669663	BCR	0	0.0012987	0	0.00519481	0.0181818	5
ILMN_1738529	BCS1L	0	0	0	0	0	5
ILMN_1744822	BECN1	0	0	0	0	0	5
ILMN_3237448	BEND5	0.0012987	0	0	0	0	5
ILMN_2157510	BLOC1S1	0	0	0	0	0	5
ILMN_1782633	BOLA2	0	0	0	0	0	5
ILMN_1659343	BOLA2	0	0	0	0	0	5
ILMN_1679800	BRIX1	0	0	0	0	0	5
ILMN_1775943	BRMS1L	0	0	0	0	0	5
ILMN_1727813	BRP44	0	0	0	0	0	5
ILMN_2365549	BRPF1	0	0	0	0	0	5
ILMN_2185845	BRSK1	0	0	0	0	0	5
ILMN_1673518	BRWD1	0	0	0	0	0	5
ILMN_2319414	BTF3	0	0	0	0	0	5
ILMN_1775743	BTG1	0	0	0	0	0	5
ILMN_1707339	BTG3	0	0	0	0	0	5
ILMN_1693145	BUB3	0	0.0272727	0	0	0	5
ILMN_1676548	BZW2	0	0	0	0	0	5
ILMN_1772706	C10orf32	0.0012987	0	0.0025974	0	0	5
ILMN_1786759	C11orf10	0	0	0	0	0	5
ILMN_1739345	C11orf48	0	0	0	0	0	5
ILMN_1815878	C11orf59	0	0	0	0	0	5
ILMN_1781419	C11orf73	0	0	0	0	0	5
ILMN_1682774	C13orf27	0	0.00519481	0	0.0038961	0	5
ILMN_3243606	C14orf174	0	0	0	0	0	5
ILMN_1804396	C14orf4	0	0	0	0	0	5
ILMN_1763688	C17orf49	0	0	0	0.0025974	0	5
ILMN_2201533	C17orf61	0	0	0	0.0025974	0	5
ILMN_1716006	C18orf54	0.0012987	0.00519481	0	0.0025974	0.00519481	5
ILMN_1784299	C19orf43	0	0	0	0	0	5
ILMN_1762439	C19orf6	0	0	0	0	0	5
ILMN_3188110	C19orf60	0	0	0	0	0	5
ILMN_1742611	C1orf52	0.0012987	0.00519481	0	0	0	5
ILMN_2387599	C20orf24	0	0	0	0	0	5
ILMN_1697363	C20orf27	0	0	0	0	0	5
ILMN_1801633	C20orf52	0	0	0	0	0	5
ILMN_1782095	C20orf55	0	0	0	0	0	5
ILMN_1663893	C21orf128	0.0012987	0.00519481	0	0	0	5
ILMN_2211724	C21orf24	0	0	0	0.0116883	0.0441558	5
ILMN_2356311	C21orf51	0	0	0	0	0	5
ILMN_1793724	C3orf31	0	0	0	0	0	5
ILMN_1798129	C4orf23	0.0012987	0.0454546	0.0454546	0.0038961	0.0103896	5
ILMN_1698677	C4orf27	0	0	0	0	0	5
ILMN_3239531	C4orf48	0.0246753	0	0.0012987	0	0	5
ILMN_1680738	C5orf13	0.0012987	0	0.0025974	0	0	5
ILMN_1761566	C5orf32	0	0	0	0	0	5
ILMN_1685854	C5orf53	0	0.00519481	0	0.0038961	0.00909091	5
ILMN_1790461	C6orf125	0	0	0	0	0	5
ILMN_1665824	C6orf218	0.0012987	0.0038961	0.0038961	0	0.0038961	5
ILMN_1745119	C7orf11	0	0	0	0	0	5
ILMN_1795703	C7orf20	0	0	0	0	0	5
ILMN_1779751	C7orf55	0	0	0	0	0	5
ILMN_3238680	C7orf55	0	0	0	0	0	5
ILMN_1652888	C8orf30A	0	0	0	0	0	5
ILMN_1784408	C8orf48	0	0.0038961	0	0.0038961	0.00909091	5
ILMN_1667405	C9orf100	0	0.00519481	0	0	0.0012987	5
ILMN_1780460	C9orf41	0	0	0	0	0	5
ILMN_1685104	C9orf6	0.0207792	0.0207792	0.0454546	0.00779221	0.0116883	5
ILMN_1806758	C9orf85	0	0	0	0	0	5
ILMN_1761789	CA7	0	0	0	0	0	5
ILMN_1680132	CADM1	0	0	0	0	0	5
ILMN_2324002	CALD1	0	0	0	0.0025974	0	5
ILMN_1687858	CALM2	0	0	0	0	0	5
ILMN_1666385	CALM3	0	0	0	0	0	5
ILMN_1778121	CALN1	0	0	0	0	0	5
ILMN_1804339	CAMK1G	0.0181818	0.0337662	0	0	0	5
ILMN_2376194	CAMK2B	0	0	0	0	0	5
ILMN_1809695	CAMK2G	0	0	0	0	0	5
ILMN_1667381	CAMKV	0	0	0	0	0	5
ILMN_1661940	CAMTA1	0	0	0	0	0	5
ILMN_1798867	CAMTA2	0	0	0	0	0	5
ILMN_1782897	CAPRIN1	0.00649351	0.00519481	0.0376623	0.00649351	0.00519481	5
ILMN_1754145	CAPRIN1	0	0	0	0	0	5
ILMN_1768870	CAPZA2	0	0	0	0	0	5
ILMN_1671728	CARD14	0.0337662	0.00519481	0	0.00779221	0.0025974	5
ILMN_1654773	CASK	0	0	0	0	0	5
ILMN_1731639	CASP3	0.0025974	0.00519481	0	0	0	5
ILMN_1687583	CAV1	0	0.0012987	0.0038961	0.0194805	0	5
ILMN_1705433	CBLL1	0	0	0	0.0103896	0.0116883	5
ILMN_1774086	CBX3	0	0	0	0	0	5
ILMN_1691930	CBX6	0	0	0	0	0	5
ILMN_1761101	CCDC112	0	0	0	0.0012987	0.0168831	5
ILMN_1686920	CCDC58	0	0	0	0	0	5
ILMN_1786125	CCNA2	0	0	0	0	0	5
ILMN_2409395	CCNC	0	0	0	0	0	5
ILMN_1742250	CCNH	0.0012987	0.0285714	0.0285714	0.0285714	0.0012987	5
ILMN_1691942	CCNI	0	0	0	0	0	5
ILMN_1787877	CCNT2	0.0181818	0	0	0	0.0038961	5
ILMN_1679382	CCT2	0	0	0	0	0	5
ILMN_2334989	CCT3	0	0	0	0	0	5
ILMN_2341793	CCT7	0	0	0	0	0	5
ILMN_1718754	CD207	0	0.0012987	0.0272727	0	0.0428571	5
ILMN_2060413	CD24	0	0	0	0	0	5
ILMN_1805519	CD24	0	0	0	0	0	5
ILMN_1694249	CD34	0	0	0	0	0.00909091	5
ILMN_1675156	CDC42	0	0	0	0	0	5
ILMN_1779228	CDH2	0	0	0	0	0	5
ILMN_1781987	CDK5	0.0012987	0	0.00519481	0.00909091	0	5
ILMN_2196347	CDKN1B	0	0.00519481	0.025974	0.0025974	0.00779221	5
ILMN_1656415	CDKN2C	0.0116883	0	0.00519481	0	0	5
ILMN_1693014	CEBPB	0	0	0	0	0	5
ILMN_1664028	CENPB	0	0	0	0	0	5
ILMN_1729142	CENPV	0	0	0	0.0168831	0	5
ILMN_1800837	CFDP1	0	0	0	0	0	5
ILMN_1705617	CFL1	0	0	0	0	0	5
ILMN_1707356	CFL2	0.0012987	0	0	0.00909091	0.0038961	5
ILMN_1658411	CHD4	0	0	0	0	0	5
ILMN_1685551	CHD4	0.0012987	0	0	0	0.00519481	5
ILMN_1679428	CHIC2	0	0	0	0	0	5
ILMN_2331205	CHKB	0	0	0	0	0	5
ILMN_1731353	CHPF	0	0	0	0	0	5
ILMN_1772991	CHPF2	0	0	0.0025974	0	0	5
ILMN_1729112	CHPT1	0	0	0	0	0	5
ILMN_1698849	CHRNA2	0.0155844	0.0116883	0.0025974	0.0116883	0	5
ILMN_1703346	CHRNE	0	0.00519481	0.00519481	0.0012987	0.00649351	5
ILMN_1677719	CHST1	0	0.0038961	0.00519481	0.0025974	0	5
ILMN_1784780	CIC	0	0	0	0	0	5
ILMN_2072296	CKS2	0	0	0	0	0	5
ILMN_1756326	CKS2	0	0	0	0	0	5
ILMN_1678775	CLEC2D	0	0	0	0	0	5
ILMN_1789733	CLIP3	0	0	0	0	0	5
ILMN_1679727	CLK1	0	0	0	0	0	5
ILMN_1815239	CLK2	0.0025974	0	0	0	0	5
ILMN_1676061	CLK2P	0.0012987	0.0285714	0.025974	0.0350649	0.0324675	5
ILMN_1695961	CLK3	0	0	0	0	0	5
ILMN_1698745	CLRN1	0	0	0	0	0	5
ILMN_2345837	CLTA	0	0	0	0	0	5
ILMN_1695420	CLTA	0	0	0	0	0	5
ILMN_1682544	CLUL1	0.0220779	0.00519481	0.0194805	0.0181818	0.00909091	5
ILMN_1712088	CLYBL	0	0	0	0	0	5
ILMN_1667840	CMTM3	0	0	0	0.0025974	0	5
ILMN_1710124	CMTM8	0	0	0	0	0	5
ILMN_1769319	CNBP	0	0	0	0	0	5
ILMN_1758543	CNIH	0.0025974	0.00779221	0.00519481	0.0415584	0.0038961	5
ILMN_1762802	CNIH2	0	0	0	0	0	5
ILMN_1772651	CNOT2	0	0	0	0	0	5
ILMN_2207393	CNOT3	0	0	0	0.0337662	0.0207792	5
ILMN_1772677	CNOT4	0	0	0	0	0	5
ILMN_1735959	CNOT4	0	0	0	0.0012987	0	5
ILMN_1674050	COL8A2	0.0012987	0	0	0.0025974	0	5
ILMN_1699112	COPB1	0	0	0	0	0	5
ILMN_1738103	COPE	0	0	0	0	0	5
ILMN_1783985	COQ6	0	0	0.0025974	0.0142857	0	5
ILMN_1704477	COX5A	0	0.0207792	0.0454546	0	0.0454546	5
ILMN_1663512	COX5B	0	0	0	0	0	5
ILMN_2154671	COX6B1	0.0350649	0.0168831	0	0.0246753	0.0116883	5
ILMN_1654151	COX6C	0	0.0025974	0	0.0181818	0.00519481	5
ILMN_1701293	COX7A2	0.0012987	0	0.0025974	0.0025974	0	5
ILMN_2375484	CPEB2	0	0.00519481	0	0.00909091	0	5
ILMN_1801703	CPLX1	0	0.0038961	0	0	0	5
ILMN_1709440	CPM	0.00909091	0.0025974	0	0.0142857	0.0012987	5
ILMN_1660426	CPSF4	0	0	0	0	0.0038961	5
ILMN_1723092	CRB3	0.0324675	0.00519481	0.0311688	0	0.00519481	5
ILMN_1751097	CREB3L2	0.0363636	0.00519481	0.0207792	0.0038961	0.0428571	5
ILMN_1731714	CREB5	0.0181818	0.0272727	0.00779221	0.0012987	0.0038961	5
ILMN_1809583	CREBBP	0	0	0	0.0025974	0	5
ILMN_1666494	CRK	0	0.0012987	0	0	0	5
ILMN_1690122	CRKL	0	0	0	0	0	5
ILMN_1737685	CRLS1	0	0	0	0	0	5
ILMN_1739770	CRSP9	0	0	0	0	0	5
ILMN_1762115	CRYZL1	0	0	0	0	0	5
ILMN_3307648	CS	0	0	0	0	0	5
ILMN_1683538	CSDE1	0	0.00519481	0	0	0.00649351	5
ILMN_1680436	CSHL1	0	0	0	0	0	5
ILMN_1754121	CSK	0	0	0	0	0	5
ILMN_2364174	CSNK1A1	0	0	0	0	0	5
ILMN_2286870	CSNK1D	0	0	0	0	0	5
ILMN_1813735	CSNK1G3	0	0	0	0.0103896	0	5
ILMN_2386354	CSNK2A1	0.038961	0.00519481	0	0.00909091	0	5
ILMN_1746375	CSNK2A1P	0	0	0	0	0	5
ILMN_2109526	CSNK2A1P	0	0.00519481	0	0.0025974	0.0428571	5
ILMN_1723843	CSNK2A2	0	0	0	0	0	5
ILMN_1800461	CSNK2B	0	0	0	0	0	5
ILMN_2397880	CSTF3	0	0	0	0	0	5
ILMN_1762002	CSTF3	0	0	0	0	0	5
ILMN_1681678	CTDSP1	0.0012987	0	0	0.0116883	0	5
ILMN_1757350	CTNNB1	0	0	0	0	0	5
ILMN_1746396	CTNNB1	0	0	0	0	0	5
ILMN_1779184	CTU2	0	0	0.00649351	0.0025974	0	5
ILMN_1773018	CUEDC2	0	0	0	0	0	5
ILMN_1686516	CUGBP1	0	0	0	0	0	5
ILMN_2382083	CUGBP1	0	0	0	0	0	5
ILMN_1669252	CUL2	0	0	0	0	0	5
ILMN_2311989	CUTA	0.0012987	0	0.0012987	0	0	5
ILMN_1713482	CWC15	0	0	0	0	0	5
ILMN_1808984	CXorf48	0.0350649	0.00519481	0.0285714	0.0025974	0.00909091	5
ILMN_3307729	CXXC5	0	0	0	0	0	5
ILMN_1679721	CYB561	0.0038961	0.00519481	0.0194805	0.00649351	0	5
ILMN_1684321	CYB5B	0	0	0	0	0	5
ILMN_3240354	CYCSP52	0	0	0	0	0	5
ILMN_1718177	CYP20A1	0.0012987	0.00519481	0.0155844	0.0025974	0	5
ILMN_1733851	DACT3	0	0	0	0	0	5
ILMN_1731619	DAD1	0	0	0	0	0	5
ILMN_1813836	DARS	0	0	0	0	0	5
ILMN_1769926	DBN1	0	0	0	0	0	5
ILMN_2412807	DCTN1	0.00519481	0.00519481	0.0207792	0.0025974	0.00909091	5
ILMN_1801403	DCUN1D4	0	0	0	0	0	5
ILMN_2124352	DCUN1D5	0	0	0	0	0	5
ILMN_1726839	DCUN1D5	0	0	0	0	0	5
ILMN_1770787	DDAH2	0	0	0	0	0	5
ILMN_1748105	DDB1	0.0012987	0.00519481	0.00779221	0.0103896	0	5
ILMN_1812262	DDR1	0.0012987	0	0	0.0116883	0.0116883	5
ILMN_2182750	DDX1	0	0	0.0116883	0.038961	0.0298701	5
ILMN_1794392	DDX3X	0	0	0	0	0	5
ILMN_1737344	DDX41	0	0	0	0	0	5
ILMN_1747162	DDX47	0	0	0	0	0	5
ILMN_1762225	DDX49	0	0	0	0	0	5
ILMN_1805344	DDX5	0	0	0	0.0012987	0	5
ILMN_1699711	DEDD	0.0012987	0	0	0.0012987	0.0181818	5
ILMN_1661653	DET1	0	0	0	0	0	5
ILMN_3236211	DGCR11	0	0	0	0	0	5
ILMN_1807455	DHRS7	0.038961	0	0.0428571	0.0025974	0.0324675	5
ILMN_2168449	DHX15	0	0	0	0	0	5
ILMN_1754839	DHX15	0	0	0	0	0	5
ILMN_1672496	DNAJA1	0	0	0	0	0	5
ILMN_1770127	DNAJA2	0	0	0	0	0	5
ILMN_1753243	DNAJB11	0	0	0	0	0	5
ILMN_1794056	DNAJB5	0	0.0038961	0.0311688	0.0025974	0.0012987	5
ILMN_1803073	DNAJC12	0.0012987	0	0.0116883	0.0168831	0.0116883	5
ILMN_1796245	DNASE2	0	0	0.00519481	0	0	5
ILMN_1795227	DNCL1	0	0	0	0	0	5
ILMN_1691393	DNPEP	0	0	0	0	0	5
ILMN_1678629	DOCK7	0	0	0	0	0	5
ILMN_1753627	DOLK	0	0	0	0	0	5
ILMN_1744244	DPAGT1	0	0	0	0	0	5
ILMN_2312732	DPP8	0	0	0	0.00909091	0	5
ILMN_1759801	DPP8	0	0.00779221	0	0.0025974	0.00519481	5
ILMN_2131880	DPY30	0	0	0	0	0	5
ILMN_1672503	DPYSL2	0	0	0	0	0	5
ILMN_1679262	DPYSL3	0	0	0	0	0	5
ILMN_1652549	DTNA	0	0	0	0	0	5
ILMN_2394777	DTNA	0	0	0	0	0.0012987	5
ILMN_1783806	DTNBP1	0	0	0	0.0012987	0.00519481	5
ILMN_1759175	DUSP10	0	0	0.0454546	0.0103896	0.00649351	5
ILMN_1689814	DUSP13	0	0	0	0	0	5
ILMN_1656501	DUSP5	0	0.00519481	0.0038961	0.0038961	0.00779221	5
ILMN_1782581	DUSP7	0	0.00649351	0	0.0285714	0.00909091	5
ILMN_2191067	DUX3	0.00519481	0.0285714	0.0025974	0	0.0298701	5
ILMN_1783448	DYNC1LI2	0	0	0	0	0	5
ILMN_2300186	DYNLL1	0	0.0012987	0.0025974	0.0142857	0	5
ILMN_1772796	DYNLL2	0	0	0	0	0	5
ILMN_2374244	DYRK2	0	0	0	0	0	5
ILMN_1669502	E2F3	0	0	0	0	0	5
ILMN_1782551	E2F5	0	0	0	0	0	5
ILMN_1751904	EDNRB	0	0	0	0.0025974	0	5
ILMN_2038774	EEF1A1	0	0	0	0	0	5
ILMN_1343291	EEF1A1	0	0	0	0	0	5
ILMN_1810810	EEF1A1	0	0	0	0	0	5
ILMN_3243441	EEF1AL7	0	0	0	0	0	5
ILMN_2318725	EEF1B2	0	0	0	0	0	5
ILMN_1694587	EEF1B2	0	0	0	0	0	5
ILMN_1675541	EEF1B2	0	0	0.00909091	0.00909091	0.00519481	5
ILMN_1725105	EEF1E1	0	0	0	0	0	5
ILMN_1749892	EGLN1	0	0	0	0	0	5
ILMN_1762899	EGR1	0	0	0	0	0	5
ILMN_1671326	EIF2C1	0	0	0	0	0	5
ILMN_1739847	EIF3D	0	0	0	0	0	5
ILMN_1739257	EIF3E	0	0	0	0	0	5
ILMN_1694398	EIF3F	0	0	0	0	0	5
ILMN_1683660	EIF3H	0	0	0	0	0	5
ILMN_1671291	EIF3I	0	0	0	0	0	5
ILMN_1762725	EIF3L	0	0	0	0	0	5
ILMN_2192694	EIF3M	0	0	0	0	0	5
ILMN_2192693	EIF3M	0	0	0	0	0	5
ILMN_1722900	EIF4A1	0	0	0	0	0	5
ILMN_1685722	EIF4A2	0	0	0	0	0.0038961	5
ILMN_1738326	EIF4E2	0	0	0	0	0	5
ILMN_1768470	EIF4G1	0	0	0	0	0	5
ILMN_2380946	EIF4G2	0	0	0	0	0	5
ILMN_2279635	EIF4G2	0	0	0	0	0	5
ILMN_1761519	EIF4G2	0	0	0	0	0	5
ILMN_1678618	ELAVL3	0	0.00519481	0.0012987	0.0025974	0.00649351	5
ILMN_3241729	EMX2OS	0	0	0	0	0	5
ILMN_2364700	ENSA	0	0	0	0	0	5
ILMN_2087941	ENTPD3	0	0	0	0.0116883	0	5
ILMN_2166865	ENY2	0	0	0	0	0	5
ILMN_1791867	EPB41L4A	0	0	0	0	0	5
ILMN_1756989	EPHA8	0	0.0181818	0.0025974	0.0103896	0	5
ILMN_1701025	EPHX1	0	0	0	0	0	5
ILMN_2359456	ERGIC3	0	0	0	0	0.0298701	5
ILMN_2359453	ERGIC3	0	0	0	0	0	5
ILMN_3247882	ERI3	0.00779221	0.00519481	0	0.0025974	0.0142857	5
ILMN_1720285	ESD	0	0	0	0	0	5
ILMN_1742145	ESPL1	0	0	0	0	0	5
ILMN_2046896	ESRRAP2	0	0	0	0	0	5
ILMN_1718924	ETFA	0	0	0	0	0	5
ILMN_1729374	ETFB	0	0	0	0	0	5
ILMN_1747281	EVI5L	0	0	0	0	0	5
ILMN_1697735	EWSR1	0	0	0	0	0	5
ILMN_1727041	EWSR1	0	0	0	0	0	5
ILMN_1742827	EXOC4	0.0012987	0.00779221	0	0.0285714	0.0038961	5
ILMN_2129927	EXT1	0	0	0	0	0	5
ILMN_2364529	EZH2	0	0	0	0	0	5
ILMN_1785661	FAM108B1	0	0	0	0	0	5
ILMN_1788416	FAM108C1	0	0	0	0	0	5
ILMN_2163306	FAM120A	0	0	0	0	0	5
ILMN_1713402	FAM160A2	0	0	0	0	0	5
ILMN_1712577	FAM174A	0	0	0	0	0	5
ILMN_1696699	FAM184A	0	0	0	0	0	5
ILMN_1749083	FAM27L	0.0038961	0.0012987	0	0	0.00519481	5
ILMN_1808011	FAM46B	0	0	0	0	0	5
ILMN_2122374	FAM49B	0	0	0	0	0.00909091	5
ILMN_1744508	FAM53C	0	0	0	0	0	5
ILMN_1723300	FAM70B	0.0311688	0.00779221	0.0181818	0.0025974	0.00649351	5
ILMN_1683231	FAM83F	0	0	0	0	0	5
ILMN_3240754	FAM90A3	0.0025974	0.0116883	0.0025974	0	0.0285714	5
ILMN_1763997	FAM98B	0.00909091	0	0	0	0	5
ILMN_1691861	FASTK	0	0	0	0	0.0038961	5
ILMN_1754795	FAT1	0	0	0	0	0	5
ILMN_1664614	FAU	0	0	0	0	0	5
ILMN_2378100	FBXL5	0	0	0	0	0	5
ILMN_1713682	FBXO11	0	0	0	0	0	5
ILMN_1729175	FBXO3	0	0	0	0	0	5
ILMN_1664826	FBXO33	0	0	0	0	0	5
ILMN_1765060	FBXO34	0	0	0	0	0	5
ILMN_1686697	FBXO38	0	0.0012987	0	0.0116883	0.0103896	5
ILMN_1656691	FBXO4	0	0	0	0.0025974	0	5
ILMN_1766983	FBXW11	0	0.0038961	0	0.0025974	0.0038961	5
ILMN_2279367	FCAR	0	0	0	0	0	5
ILMN_1660027	FCGR2B	0.0025974	0.00649351	0	0.0116883	0.0012987	5
ILMN_2134453	FCGR3B	0	0	0	0	0	5
ILMN_1779071	FEZ1	0	0	0	0	0	5
ILMN_1797030	FGF18	0.00649351	0.00519481	0	0.0038961	0.00649351	5
ILMN_1803597	FGL1	0	0	0	0	0	5
ILMN_1778152	FIGNL1	0	0	0	0	0	5
ILMN_2389114	FIGNL1	0	0	0	0	0	5
ILMN_1730906	FILIP1L	0	0	0	0	0	5
ILMN_1781803	FIZ1	0	0	0	0	0	5
ILMN_2150294	FKBP14	0	0	0	0	0	5
ILMN_1683969	FKBP1A	0	0	0	0	0	5
ILMN_2333367	FKBP1A	0	0	0	0	0	5
ILMN_1778444	FKBP5	0	0	0	0	0	5
ILMN_1705743	FLJ10357	0.0012987	0.0194805	0	0	0	5
ILMN_1723834	FLJ32011	0.00519481	0.0194805	0.0116883	0.0038961	0.0025974	5
ILMN_3235148	FLJ43681	0	0	0	0	0	5
ILMN_3236599	FLJ44054	0.0012987	0	0	0	0	5
ILMN_1751351	FLJ90086	0.0415584	0.00519481	0.00519481	0.00519481	0	5
ILMN_1726222	FLOT2	0.00909091	0	0	0	0.0103896	5
ILMN_2204876	FLVCR2	0	0	0	0	0	5
ILMN_1736510	FOXN2	0	0	0	0	0	5
ILMN_1783954	FOXN3	0	0.00519481	0	0	0.0311688	5
ILMN_1712095	FOXO4	0	0	0	0	0	5
ILMN_1808707	FSCN1	0	0	0	0	0	5
ILMN_1750278	FTHL12	0	0	0	0	0	5
ILMN_2073235	FTHL12	0	0	0	0	0	5
ILMN_1746525	FTHL2	0	0	0	0	0	5
ILMN_2173835	FTHL3	0	0	0	0	0	5
ILMN_2234016	FTHL7	0	0	0	0	0	5
ILMN_1696911	FTHL8	0	0	0	0	0	5
ILMN_1740429	FTL	0	0	0	0	0	5
ILMN_1814823	FTL	0	0	0	0	0	5
ILMN_2389273	FXR1	0	0	0	0	0	5
ILMN_1738699	FXR2	0	0	0	0	0	5
ILMN_1686555	FYN	0	0	0.00779221	0.0116883	0.0038961	5
ILMN_2249920	FYN	0	0	0	0	0	5
ILMN_2389935	FYTTD1	0.0012987	0.0194805	0.0376623	0.0116883	0.0116883	5
ILMN_2108823	FZD7	0.0012987	0	0	0	0	5
ILMN_1796458	GABARAPL2	0	0	0	0	0	5
ILMN_1761147	GABPB2	0	0	0	0	0.0272727	5
ILMN_1706005	GALT	0	0	0	0	0	5
ILMN_1794552	GAP43	0	0	0.0272727	0.0025974	0	5
ILMN_2038778	GAPDH	0	0	0	0	0	5
ILMN_1343295	GAPDH	0	0	0	0	0	5
ILMN_3267451	GAPDHL6	0	0	0	0	0	5
ILMN_1771026	GARS	0	0.025974	0.0012987	0	0.00779221	5
ILMN_1755123	GBA	0	0	0	0	0	5
ILMN_1685948	GCET2	0	0	0	0.0025974	0.00909091	5
ILMN_1707484	GEMIN6	0	0	0.00779221	0	0	5
ILMN_2278908	GGA1	0	0	0	0	0	5
ILMN_1725620	GGNBP2	0	0	0	0	0	5
ILMN_1815639	GIGYF1	0	0.0012987	0	0.0012987	0.0038961	5
ILMN_1733155	GIT1	0	0	0	0	0	5
ILMN_1781431	GLCCI1	0	0	0	0	0	5
ILMN_1703565	GLTSCR2	0	0	0.00519481	0	0.00649351	5
ILMN_2093674	GMFB	0	0	0	0.0025974	0	5
ILMN_1804476	GMPPA	0	0	0	0	0	5
ILMN_3242205	GMPS	0	0	0	0	0.0012987	5
ILMN_1775762	GNAI2	0	0	0	0	0	5
ILMN_1769191	GNAS	0	0	0	0	0	5
ILMN_1750901	GNAT1	0.0012987	0.0025974	0.00779221	0.0038961	0.0142857	5
ILMN_1760320	GNB1	0	0	0	0	0	5
ILMN_1658928	GNB2	0	0.00519481	0.00519481	0.0038961	0	5
ILMN_1686235	GNPNAT1	0	0	0	0	0	5
ILMN_1662719	GPBP1L1	0	0	0	0	0	5
ILMN_1651642	GPC2	0	0	0.0012987	0	0	5
ILMN_1805216	GPC6	0	0	0	0	0.00649351	5
ILMN_1735438	GPM6B	0	0	0	0	0	5
ILMN_1704665	GPM6B	0	0	0	0	0	5
ILMN_1670308	GPM6B	0.0012987	0	0	0.0025974	0	5
ILMN_1804332	GPR137	0	0	0	0	0	5
ILMN_1804938	GPR175	0	0	0	0	0	5
ILMN_1749662	GPX1	0	0	0	0	0	5
ILMN_2378952	GPX4	0	0	0	0	0	5
ILMN_1660372	GRIA2	0	0	0	0	0	5
ILMN_1796490	GRINA	0	0	0	0	0	5
ILMN_1728830	GRK5	0.012987	0.00779221	0	0	0.0038961	5
ILMN_2096719	GRK5	0	0	0	0.00909091	0.00779221	5
ILMN_1779376	GSK3B	0	0	0	0	0	5
ILMN_1753719	GTF2A2	0	0	0	0	0	5
ILMN_1800308	GTF2H4	0	0	0	0	0	5
ILMN_1739497	GTF2H5	0	0	0	0	0	5
ILMN_1708728	H2AFJ	0	0	0	0	0	5
ILMN_1674034	H2AFY	0	0	0	0	0	5
ILMN_1707858	H2AFZ	0	0	0	0	0	5
ILMN_1656082	H3F3A	0	0	0	0	0	5
ILMN_1699015	H3F3A	0	0	0	0	0	5
ILMN_2106331	H3F3A	0	0	0	0	0	5
ILMN_1740217	HACE1	0.0025974	0.0402597	0	0.0103896	0.0246753	5
ILMN_2220518	HBXIP	0	0	0.0103896	0	0	5
ILMN_1660923	HCG4	0	0	0	0	0	5
ILMN_2189314	HDGFL1	0	0	0	0	0	5
ILMN_1806692	HEXB	0	0	0	0	0	5
ILMN_1763007	HIAT1	0	0	0	0	0	5
ILMN_3235410	HIATL2	0	0.00649351	0.0025974	0.0025974	0.0103896	5
ILMN_1807710	HINT1	0	0	0	0	0	5
ILMN_1753524	HIST1H2AB	0	0	0	0	0	5
ILMN_1756849	HIST1H2AE	0	0	0	0	0	5
ILMN_1680937	HIST1H2BC	0.0181818	0	0.038961	0.0025974	0	5
ILMN_1779648	HIST3H2A	0	0	0	0	0	5
ILMN_1707173	HIST3H3	0	0	0	0	0	5
ILMN_1807833	HM13	0	0	0	0	0	5
ILMN_2311537	HMGA1	0	0	0	0	0	5
ILMN_2211800	HMGB1L1	0	0	0	0	0	5
ILMN_1809439	HMGB1L1	0	0	0	0	0	5
ILMN_1654268	HMGB2	0	0	0.00779221	0	0.0012987	5
ILMN_1657395	HMGCR	0	0	0	0	0	5
ILMN_1776879	HMGN2	0	0	0	0	0	5
ILMN_1728803	HMP19	0.0181818	0.0012987	0	0	0	5
ILMN_1815882	HNRNPA1	0	0	0	0	0	5
ILMN_3178792	HNRNPA2B1	0	0	0	0	0	5
ILMN_2174574	HNRNPA3P1	0	0	0	0	0	5
ILMN_1696485	HNRNPAB	0	0	0	0	0	5
ILMN_1651262	HNRNPAB	0	0	0	0	0	5
ILMN_1751368	HNRNPD	0	0	0	0	0	5
ILMN_2321451	HNRNPD	0	0	0	0	0	5
ILMN_3246409	HNRNPH1	0	0	0	0	0	5
ILMN_3260017	HNRNPK	0	0	0	0	0	5
ILMN_3192791	HNRNPM	0.00649351	0.00519481	0.0142857	0.0025974	0	5
ILMN_3269405	HNRNPM	0	0	0	0	0	5
ILMN_3177285	HNRNPR	0	0	0	0	0	5
ILMN_2370135	HNRNPU	0	0	0	0	0	5
ILMN_1690586	HNRPA1P4	0	0	0	0	0	5
ILMN_2369682	HNRPA2B1	0	0	0	0	0	5
ILMN_1695588	HNRPC	0	0	0	0	0.0038961	5
ILMN_1653432	HNRPDL	0	0	0	0	0	5
ILMN_2101920	HNRPH1	0	0	0	0	0.0025974	5
ILMN_1712357	HNRPK	0	0	0.00519481	0.0012987	0.0441558	5
ILMN_1745385	HNRPM	0	0	0	0	0	5
ILMN_2175894	HNRPR	0	0	0	0	0	5
ILMN_1810327	HNRPUL2	0	0.0012987	0	0	0.00779221	5
ILMN_1753613	HOXA5	0	0	0	0	0	5
ILMN_1815570	HOXA6	0.0220779	0.0207792	0	0	0	5
ILMN_1794492	HOXC6	0.0012987	0.0246753	0	0	0	5
ILMN_1792497	HRB	0	0	0	0.0012987	0	5
ILMN_1912366		0.0207792	0.00519481	0.00649351	0.0025974	0.00649351	5
ILMN_1869354		0.0246753	0.00519481	0.0025974	0.0025974	0.0116883	5
ILMN_1831098		0	0	0	0	0.00779221	5
ILMN_1833964		0.0220779	0.0207792	0.0194805	0.00779221	0.00649351	5
ILMN_1865069		0.0324675	0.00519481	0.0350649	0.0012987	0.038961	5
ILMN_1902949		0.0012987	0.0272727	0.0038961	0.0012987	0	5
ILMN_1891324		0.012987	0	0	0	0.00649351	5
ILMN_1833478		0	0	0	0	0	5
ILMN_1911487		0.0207792	0.0454546	0.0025974	0.0363636	0.00779221	5
ILMN_1867439		0.0012987	0.00779221	0.0025974	0.0025974	0.00519481	5
ILMN_1869109		0	0	0	0	0	5
ILMN_1826531		0	0	0	0	0	5
ILMN_1874016		0.012987	0.0038961	0	0.0025974	0.0012987	5
ILMN_1846072		0	0	0	0.0116883	0.0038961	5
ILMN_1876838		0.0012987	0	0.0012987	0.0025974	0.0012987	5
ILMN_1915188		0	0	0	0	0	5
ILMN_1907705		0	0.0012987	0	0.0025974	0	5
ILMN_1848552		0	0	0	0	0	5
ILMN_1872456		0	0	0	0	0	5
ILMN_1851639		0	0	0	0	0	5
ILMN_1873540		0	0.0025974	0	0.0012987	0	5
ILMN_1880406		0	0	0	0	0	5
ILMN_1829362		0	0.00779221	0.00649351	0.0116883	0.0012987	5
ILMN_1819805		0	0.0207792	0	0.0012987	0	5
ILMN_1851453		0	0.00519481	0	0.0025974	0.0103896	5
ILMN_1821280		0	0	0	0	0	5
ILMN_1908530		0.0142857	0.0168831	0	0	0.00649351	5
ILMN_1878459		0.0428571	0.0454546	0.0012987	0.0467533	0.0038961	5
ILMN_1821681		0.00909091	0.00519481	0	0	0	5
ILMN_1857768		0.0012987	0	0	0	0	5
ILMN_1886493		0	0	0	0	0	5
ILMN_1875887		0	0	0	0	0	5
ILMN_1900929		0	0	0	0	0	5
ILMN_1916642		0.0350649	0.0493507	0.0363636	0.0025974	0.0038961	5
ILMN_1892765		0.0038961	0.0025974	0	0.0116883	0.0038961	5
ILMN_1863939		0	0	0	0	0	5
ILMN_1909073		0.0012987	0	0	0	0	5
ILMN_1822571		0.00779221	0.0155844	0.00519481	0.0467533	0.0038961	5
ILMN_1857569		0.0012987	0	0	0.0142857	0.0493507	5
ILMN_1880704		0	0	0	0	0	5
ILMN_1860084		0	0	0	0	0	5
ILMN_1836570		0.0012987	0	0	0.0025974	0	5
ILMN_1882560		0	0.00519481	0.0103896	0.0025974	0	5
ILMN_1904111		0.0012987	0.025974	0.0103896	0.0025974	0	5
ILMN_1879482		0.0038961	0.0142857	0	0	0.00909091	5
ILMN_1906842		0.0493507	0.0168831	0	0	0	5
ILMN_1848166		0.0012987	0.00519481	0.0454546	0.0116883	0.0103896	5
ILMN_1854015		0	0.0207792	0.00779221	0.0012987	0.0116883	5
ILMN_1880103		0	0	0	0	0	5
ILMN_1906743		0.0324675	0	0.00519481	0.0025974	0.0142857	5
ILMN_1866255		0.0493507	0.0207792	0	0.0025974	0	5
ILMN_1903345		0	0.0012987	0	0.0038961	0	5
ILMN_1831826		0.0493507	0.0194805	0	0	0.0012987	5
ILMN_1839193		0	0.0012987	0	0	0.0142857	5
ILMN_1848461		0	0.0025974	0	0.0012987	0.0012987	5
ILMN_1888264		0.0012987	0.0103896	0.0194805	0.0168831	0.00649351	5
ILMN_1881909		0	0	0	0	0	5
ILMN_1907620		0.00519481	0.00519481	0	0	0.0142857	5
ILMN_1864421		0.0324675	0.025974	0.0142857	0	0.00649351	5
ILMN_1834803		0.0181818	0	0.0103896	0.0142857	0	5
ILMN_1673795	HSD17B4	0	0	0	0	0	5
ILMN_1715324	HSD17B8	0	0	0	0	0	5
ILMN_1673711	HSP90AB1	0	0	0	0	0	5
ILMN_1696289	HSP90AB6P	0	0	0	0	0	5
ILMN_2096116	HSP90B1	0	0	0	0	0	5
ILMN_1766499	HSPA2	0	0	0	0	0.0012987	5
ILMN_1658383	HSPA6	0	0	0.00649351	0	0.00779221	5
ILMN_1686367	HSPA8	0	0	0	0	0	5
ILMN_2092536	HSPE1	0	0	0	0.0246753	0	5
ILMN_1785574	HTRA2	0	0	0	0	0	5
ILMN_1685870	HYDIN	0.0012987	0	0.0025974	0.0012987	0	5
ILMN_2217329	IAH1	0	0	0	0	0	5
ILMN_1814787	ICA1	0	0	0	0	0	5
ILMN_2373632	IDH3B	0	0	0	0	0	5
ILMN_1802706	IDH3G	0	0	0	0	0	5
ILMN_1670572	IDO2	0.0142857	0	0	0	0	5
ILMN_1755620	IER5L	0	0	0	0	0	5
ILMN_2347798	IFI6	0	0	0	0.0025974	0.0285714	5
ILMN_1801246	IFITM1	0	0	0	0	0	5
ILMN_1673352	IFITM2	0	0	0	0.0025974	0	5
ILMN_1770071	IFITM4P	0	0	0	0	0	5
ILMN_1893909	IKZF2	0.0142857	0.0467533	0	0.0142857	0.00649351	5
ILMN_1813572	IL16	0.00649351	0.0038961	0	0	0.0441558	5
ILMN_1788109	IL17C	0	0.0012987	0	0.0025974	0.0142857	5
ILMN_1759141	IL1F5	0.0181818	0.0207792	0.0272727	0.012987	0.0038961	5
ILMN_1669584	ILF3	0	0	0	0	0	5
ILMN_2364376	ILK	0	0	0	0	0	5
ILMN_2358980	ILK	0	0	0	0	0	5
ILMN_2388363	IMPDH1	0.0025974	0.00519481	0.0103896	0.0025974	0.00649351	5
ILMN_1719273	INPP5A	0.0142857	0.0194805	0.0025974	0	0.0467533	5
ILMN_1813650	INPP5F	0	0	0	0	0	5
ILMN_1797668	INSM1	0	0	0	0	0	5
ILMN_1660844	INTS4	0	0	0	0	0	5
ILMN_1655557	INTS6	0.00909091	0.0207792	0.0272727	0.0285714	0.00909091	5
ILMN_1652378	IPO7	0	0	0	0	0	5
ILMN_1735353	IRX1	0	0	0	0	0	5
ILMN_1693310	ITFG1	0	0	0	0	0	5
ILMN_2383934	ITGB1	0	0	0	0	0	5
ILMN_1751708	ITM2B	0	0	0.0272727	0.0285714	0.0246753	5
ILMN_2407482	ITPA	0	0	0	0	0	5
ILMN_1747241	IWS1	0	0	0	0	0	5
ILMN_3238036	JAGN1	0	0	0	0	0.0038961	5
ILMN_3236838	JMJD7	0	0	0.0454546	0.0025974	0	5
ILMN_1802434	JPH2	0	0	0	0	0	5
ILMN_1810214	JUND	0	0	0	0	0	5
ILMN_1777584	KARS	0	0	0	0	0	5
ILMN_1784540	KBTBD2	0	0	0	0	0	5
ILMN_1808272	KCNJ10	0.0142857	0.00519481	0.0012987	0	0.00909091	5
ILMN_1651464	KDM2B	0.0363636	0.00779221	0.0025974	0	0.0103896	5
ILMN_2285996	KIAA0101	0	0	0	0	0	5
ILMN_1807767	KIAA0182	0	0	0	0	0	5
ILMN_1728676	KIAA0196	0	0	0	0	0	5
ILMN_1703969	KIAA0251	0	0	0	0.0025974	0.0038961	5
ILMN_1693668	KIAA0261	0	0	0	0	0	5
ILMN_1683277	KIAA0319L	0.0311688	0.0402597	0.0194805	0.0181818	0.0220779	5
ILMN_1668469	KIAA0922	0	0	0	0	0	5
ILMN_2200636	KIAA1267	0	0	0	0	0	5
ILMN_1678235	KIAA1267	0	0	0.0038961	0	0.0012987	5
ILMN_1796751	KIAA1274	0	0	0.00519481	0	0.0012987	5
ILMN_1700733	KIAA1370	0.0012987	0	0.00519481	0.0038961	0.0142857	5
ILMN_1741841	KIAA1429	0.0207792	0.0012987	0.0376623	0.0038961	0.0337662	5
ILMN_1668619	KIAA1467	0.0493507	0.0272727	0.012987	0.0025974	0.00649351	5
ILMN_1732988	KIAA1666	0	0.0272727	0	0	0.0194805	5
ILMN_1803254	KIAA2010	0	0	0	0	0	5
ILMN_1788400	KIAA2022	0	0.00519481	0	0.0168831	0.00649351	5
ILMN_1811472	KIF23	0	0	0	0	0	5
ILMN_1726901	KLC1	0	0	0	0	0	5
ILMN_1659122	KLF10	0	0	0	0	0	5
ILMN_1683133	KLF15	0	0.0038961	0	0.0038961	0.00519481	5
ILMN_1664756	KPNA4	0	0	0	0	0	5
ILMN_3191922	KRT8P9	0	0	0	0	0	5
ILMN_1776412	KRTAP10-11	0.0181818	0.0246753	0.0142857	0.0038961	0.038961	5
ILMN_1797201	KRTAP10-2	0	0	0	0	0	5
ILMN_1703335	LACTB	0	0	0	0	0	5
ILMN_2389211	LAIR1	0	0	0	0	0.0038961	5
ILMN_1810852	LAMC1	0	0	0	0	0	5
ILMN_1673282	LAMP2	0	0	0	0	0	5
ILMN_1659753	LAMP2	0	0	0	0.0038961	0	5
ILMN_1745110	LAPTM4A	0	0	0	0	0	5
ILMN_1811507	LBH	0.0012987	0	0.0142857	0.00909091	0	5
ILMN_1768969	LBR	0	0	0	0	0	5
ILMN_1689817	LCOR	0	0.0012987	0	0	0.0103896	5
ILMN_1727361	LEMD3	0	0	0	0	0	5
ILMN_1723978	LGALS1	0	0	0	0	0	5
ILMN_2266214	LGALS8	0.025974	0.0012987	0	0	0	5
ILMN_1656869	LGALS9B	0	0	0	0	0	5
ILMN_1767448	LHFP	0	0	0	0.00519481	0.0038961	5
ILMN_1756755	LINGO1	0	0	0	0.0038961	0	5
ILMN_1717524	LIPT1	0	0	0	0	0	5
ILMN_1715814	LMAN1	0	0.00519481	0	0	0.0012987	5
ILMN_1652128	LMBRD1	0	0	0	0	0	5
ILMN_1696749	LMNA	0.0012987	0	0	0.0025974	0	5
ILMN_1703487	LMO4	0	0	0	0.0025974	0.00649351	5
ILMN_2117171	LMO4	0	0	0	0	0	5
ILMN_3243593	LOC100008588	0	0	0	0	0	5
ILMN_1733559	LOC100008589	0	0	0	0	0	5
ILMN_3251587	LOC100008589	0	0	0	0	0	5
ILMN_3239689	LOC100093631	0	0	0	0.0285714	0	5
ILMN_3188005	LOC100127913	0.0012987	0	0	0.0025974	0	5
ILMN_3252941	LOC100127918	0	0	0	0	0	5
ILMN_3271412	LOC100127922	0	0	0	0	0	5
ILMN_3187425	LOC100127975	0	0	0	0	0	5
ILMN_3262025	LOC100127993	0	0	0	0	0	5
ILMN_3195372	LOC100128056	0	0	0	0	0	5
ILMN_3188076	LOC100128060	0	0	0	0	0	5
ILMN_3260618	LOC100128086	0.0012987	0	0.00519481	0.0025974	0.0038961	5
ILMN_3266666	LOC100128196	0	0	0	0	0.0012987	5
ILMN_3191695	LOC100128266	0	0	0	0	0	5
ILMN_3268165	LOC100128353	0	0	0	0	0	5
ILMN_3268914	LOC100128410	0	0	0	0	0	5
ILMN_3252093	LOC100128548	0	0	0	0	0	5
ILMN_3268083	LOC100128689	0	0	0	0	0	5
ILMN_3247452	LOC100128731	0	0	0	0	0	5
ILMN_3267017	LOC100129028	0	0	0	0	0	5
ILMN_3258424	LOC100129118	0	0	0	0.0025974	0.0038961	5
ILMN_3270676	LOC100129139	0	0	0	0	0	5
ILMN_3266482	LOC100129158	0	0	0	0	0	5
ILMN_3255931	LOC100129297	0	0.0025974	0	0	0	5
ILMN_3178252	LOC100129379	0	0	0	0	0	5
ILMN_3194217	LOC100129424	0	0	0	0	0	5
ILMN_3190596	LOC100129552	0	0	0	0	0.0025974	5
ILMN_3266128	LOC100129553	0	0	0	0	0	5
ILMN_3266471	LOC100129566	0	0	0	0	0	5
ILMN_3177271	LOC100129585	0	0	0	0	0	5
ILMN_3256868	LOC100129585	0	0	0	0	0	5
ILMN_3263007	LOC100129608	0.0012987	0	0	0.0025974	0	5
ILMN_3254492	LOC100129650	0	0	0	0.0025974	0	5
ILMN_3193623	LOC100129657	0	0	0	0	0	5
ILMN_3268697	LOC100129882	0	0	0	0	0	5
ILMN_3256742	LOC100129902	0	0	0	0	0	5
ILMN_3252395	LOC100129934	0	0	0	0.00909091	0	5
ILMN_3259712	LOC100129952	0.0012987	0	0	0.0025974	0	5
ILMN_3261875	LOC100129977	0	0	0	0	0	5
ILMN_3187479	LOC100129982	0	0	0	0	0	5
ILMN_3264073	LOC100130070	0	0	0	0	0	5
ILMN_3232282	LOC100130445	0.0012987	0	0	0	0.0038961	5
ILMN_3176040	LOC100130446	0	0	0	0	0	5
ILMN_3246360	LOC100130553	0	0	0	0	0	5
ILMN_3265797	LOC100130561	0	0	0	0	0	5
ILMN_3269537	LOC100130562	0	0	0	0	0	5
ILMN_3268246	LOC100130701	0	0	0	0	0	5
ILMN_3271244	LOC100130775	0	0	0	0	0	5
ILMN_3195253	LOC100130892	0	0	0	0	0	5
ILMN_3199916	LOC100130980	0	0	0	0	0	5
ILMN_3204874	LOC100131009	0.025974	0.00779221	0.0012987	0	0.0285714	5
ILMN_3211746	LOC100131166	0	0	0	0	0	5
ILMN_3202673	LOC100131196	0	0	0	0	0	5
ILMN_3278070	LOC100131336	0	0	0	0	0	5
ILMN_3218721	LOC100131349	0	0	0	0	0	5
ILMN_3215367	LOC100131360	0	0.00649351	0	0	0	5
ILMN_3242572	LOC100131368	0.0142857	0.00779221	0.0207792	0.00779221	0.0246753	5
ILMN_3279144	LOC100131672	0	0	0	0	0.0116883	5
ILMN_3208233	LOC100131735	0	0	0.0142857	0.0012987	0	5
ILMN_3280294	LOC100131737	0	0	0	0.0116883	0	5
ILMN_3206827	LOC100131737	0	0.00779221	0.025974	0.0285714	0.0012987	5
ILMN_3293244	LOC100131744	0.0012987	0.00519481	0	0	0.00779221	5
ILMN_3208014	LOC100131866	0	0	0	0	0	5
ILMN_3275489	LOC100131905	0	0	0	0	0	5
ILMN_3283664	LOC100132037	0	0	0	0	0	5
ILMN_3287058	LOC100132086	0	0	0	0	0	5
ILMN_3239004	LOC100132213	0.0012987	0	0	0.0025974	0	5
ILMN_3275345	LOC100132291	0	0	0	0	0	5
ILMN_3249578	LOC100132394	0	0	0	0	0	5
ILMN_3284177	LOC100132425	0	0	0	0	0	5
ILMN_3288161	LOC100132488	0	0	0	0	0	5
ILMN_3236130	LOC100132547	0	0	0	0	0	5
ILMN_3243644	LOC100132564	0	0	0	0	0	5
ILMN_3294222	LOC100132673	0	0	0	0.0025974	0.0181818	5
ILMN_3248403	LOC100132717	0.0142857	0	0.0194805	0.0025974	0.00519481	5
ILMN_3279306	LOC100132742	0	0	0	0	0	5
ILMN_3280019	LOC100132795	0	0	0	0	0	5
ILMN_3201986	LOC100132795	0	0	0	0	0	5
ILMN_3292244	LOC100132804	0	0	0	0	0	5
ILMN_3205271	LOC100132863	0	0	0	0	0	5
ILMN_3288830	LOC100132918	0	0	0	0	0	5
ILMN_3279875	LOC100132973	0	0	0	0	0	5
ILMN_3283015	LOC100133185	0.0012987	0.00519481	0.0025974	0.00909091	0.0285714	5
ILMN_3235357	LOC100133329	0	0	0	0	0	5
ILMN_3249618	LOC100133477	0	0	0	0	0	5
ILMN_3285616	LOC100133478	0	0	0	0	0	5
ILMN_3239610	LOC100133565	0	0	0	0	0	5
ILMN_3203189	LOC100133591	0	0	0	0	0.00519481	5
ILMN_3246424	LOC100133600	0	0	0	0	0	5
ILMN_3274470	LOC100133607	0	0	0	0	0	5
ILMN_3246315	LOC100133697	0	0	0	0	0	5
ILMN_3238640	LOC100133812	0	0	0	0	0	5
ILMN_3236675	LOC100133823	0	0	0	0	0.0012987	5
ILMN_3202483	LOC100133876	0	0	0	0	0	5
ILMN_3246514	LOC100134182	0	0	0	0.0025974	0.0038961	5
ILMN_3244920	LOC100134188	0.0038961	0.0454546	0.0012987	0.0168831	0.0441558	5
ILMN_3244907	LOC100134201	0	0	0	0.0025974	0	5
ILMN_3239785	LOC100134304	0.0181818	0.025974	0.0038961	0.0038961	0.00649351	5
ILMN_3246805	LOC100134364	0	0	0	0	0	5
ILMN_3240626	LOC100134424	0	0	0	0	0	5
ILMN_1744347	LOC127295	0	0	0	0	0	5
ILMN_3214256	LOC128192	0.0181818	0.025974	0	0.0467533	0	5
ILMN_1747389	LOC128322	0	0	0	0	0	5
ILMN_1672009	LOC130773	0	0	0	0	0	5
ILMN_1738858	LOC131055	0	0	0	0	0	5
ILMN_1668228	LOC136143	0	0	0	0	0	5
ILMN_1671372	LOC137107	0	0	0.00909091	0	0.00909091	5
ILMN_1655311	LOC145853	0	0	0	0	0	5
ILMN_1807556	LOC146177	0.0012987	0.00779221	0	0.0025974	0.00909091	5
ILMN_1764186	LOC146517	0	0	0	0	0	5
ILMN_3211079	LOC148430	0	0	0	0	0	5
ILMN_1679470	LOC149224	0	0	0.00649351	0.0116883	0.0298701	5
ILMN_1735172	LOC151121	0	0	0	0	0	5
ILMN_1685538	LOC158345	0	0	0	0	0	5
ILMN_1795243	LOC220433	0	0	0	0	0	5
ILMN_3274904	LOC284230	0	0	0	0	0	5
ILMN_1680208	LOC284821	0	0	0	0	0	5
ILMN_1695261	LOC285176	0	0	0	0	0	5
ILMN_3216336	LOC285741	0	0	0	0.0142857	0	5
ILMN_3292551	LOC286157	0	0	0	0	0.0012987	5
ILMN_3293685	LOC286444	0	0	0	0	0	5
ILMN_3217172	LOC286444	0	0	0	0	0	5
ILMN_3274596	LOC286512	0	0	0	0	0	5
ILMN_3294074	LOC338870	0	0	0	0	0	5
ILMN_3201221	LOC341315	0	0	0	0	0	5
ILMN_1688127	LOC341457	0	0	0	0	0	5
ILMN_3284063	LOC341965	0	0	0	0	0	5
ILMN_1750081	LOC342541	0	0	0	0	0	5
ILMN_3283680	LOC345041	0.0012987	0	0	0	0.0038961	5
ILMN_1704385	LOC347376	0	0	0	0	0	5
ILMN_1801795	LOC347544	0	0.0012987	0.00649351	0.0168831	0.00649351	5
ILMN_1677402	LOC387763	0.0012987	0	0	0	0.0038961	5
ILMN_3200322	LOC387791	0	0	0	0	0.00649351	5
ILMN_1660376	LOC387841	0	0	0	0	0.00519481	5
ILMN_1710885	LOC387867	0	0	0	0	0	5
ILMN_1734149	LOC388122	0	0	0	0	0	5
ILMN_1682873	LOC388474	0	0	0	0	0	5
ILMN_1749834	LOC388588	0	0	0	0	0	5
ILMN_1659550	LOC388654	0	0	0	0	0	5
ILMN_3198247	LOC388707	0	0.00779221	0	0.0025974	0.0233766	5
ILMN_1754990	LOC388720	0	0	0	0	0	5
ILMN_3276990	LOC389141	0	0	0	0	0	5
ILMN_3280943	LOC389156	0	0	0	0	0	5
ILMN_3210171	LOC389156	0	0	0	0	0	5
ILMN_3210917	LOC389168	0	0	0	0	0	5
ILMN_3285198	LOC389168	0	0	0	0	0	5
ILMN_3279017	LOC389223	0	0	0	0	0	5
ILMN_3217285	LOC389322	0	0	0	0	0	5
ILMN_3199798	LOC389342	0	0	0	0.0038961	0	5
ILMN_3215715	LOC389386	0	0	0.00519481	0	0.00779221	5
ILMN_3200661	LOC389404	0	0	0	0	0	5
ILMN_1704315	LOC389435	0	0	0	0	0	5
ILMN_1679700	LOC389672	0	0	0	0	0	5
ILMN_1665823	LOC389787	0	0	0	0	0	5
ILMN_3277715	LOC389873	0	0	0	0	0	5
ILMN_3292572	LOC390183	0	0	0	0	0	5
ILMN_3199929	LOC390183	0	0	0	0	0	5
ILMN_1676765	LOC390354	0	0	0	0	0	5
ILMN_1665781	LOC390466	0	0	0	0	0	5
ILMN_3241354	LOC390660	0.0350649	0.0038961	0	0.0103896	0	5
ILMN_3285753	LOC390671	0	0.00519481	0	0	0	5
ILMN_1718997	LOC390956	0.0012987	0	0.0207792	0.0025974	0	5
ILMN_3205656	LOC391075	0	0	0	0	0	5
ILMN_1770854	LOC391124	0	0	0	0	0	5
ILMN_3205762	LOC391132	0	0	0	0	0.00909091	5
ILMN_3293367	LOC391370	0	0	0	0	0	5
ILMN_3292163	LOC391532	0	0	0.0025974	0	0	5
ILMN_1743207	LOC391692	0	0	0.0012987	0	0	5
ILMN_3278627	LOC391769	0	0.00519481	0.00779221	0.0025974	0.00649351	5
ILMN_3280952	LOC391777	0	0	0	0	0	5
ILMN_3290577	LOC391833	0	0	0	0	0	5
ILMN_3203976	LOC392008	0	0	0.0025974	0.0012987	0.00649351	5
ILMN_3201975	LOC392285	0	0	0	0	0	5
ILMN_3279652	LOC392301	0	0	0	0	0	5
ILMN_3276676	LOC392382	0	0	0	0	0	5
ILMN_3274711	LOC392501	0	0	0	0	0	5
ILMN_1693465	LOC392506	0	0	0.00519481	0	0	5
ILMN_3284084	LOC392522	0	0	0	0	0	5
ILMN_3284119	LOC399804	0	0	0	0	0	5
ILMN_1701314	LOC399900	0	0.0142857	0	0.00909091	0.0350649	5
ILMN_3200330	LOC399988	0	0	0	0	0	5
ILMN_3199609	LOC400013	0	0	0	0	0	5
ILMN_1754865	LOC400455	0	0	0	0	0	5
ILMN_1783712	LOC400506	0	0	0	0	0	5
ILMN_3289247	LOC400750	0	0	0.0012987	0	0	5
ILMN_1739335	LOC400948	0	0	0	0	0	5
ILMN_1688749	LOC400963	0	0	0	0	0	5
ILMN_1656962	LOC401019	0	0	0	0	0	5
ILMN_3276859	LOC401127	0	0	0	0	0.00909091	5
ILMN_1792528	LOC401206	0	0	0	0	0	5
ILMN_3274271	LOC401537	0	0	0	0	0	5
ILMN_3292008	LOC401676	0	0	0	0	0	5
ILMN_1669233	LOC401677	0	0	0	0	0	5
ILMN_3203515	LOC401717	0	0	0	0	0	5
ILMN_3274586	LOC401817	0	0	0.00519481	0	0	5
ILMN_2407235	LOC402057	0	0	0	0	0	5
ILMN_1664610	LOC402057	0	0	0	0	0	5
ILMN_1811909	LOC402221	0	0	0	0	0	5
ILMN_1687080	LOC402251	0	0	0	0	0	5
ILMN_1686811	LOC402644	0	0	0	0	0	5
ILMN_1738356	LOC402694	0	0	0	0	0.0038961	5
ILMN_3213792	LOC439953	0	0	0	0	0	5
ILMN_3290298	LOC439953	0	0	0.00519481	0	0	5
ILMN_1671045	LOC439992	0	0	0	0	0	5
ILMN_3276794	LOC440027	0	0	0	0	0	5
ILMN_1706434	LOC440359	0	0.00519481	0	0	0.00649351	5
ILMN_3287157	LOC440575	0	0	0	0	0	5
ILMN_1652768	LOC440589	0	0	0	0	0	5
ILMN_1737074	LOC440589	0	0	0	0	0	5
ILMN_3218248	LOC440595	0	0	0	0	0	5
ILMN_1671217	LOC440733	0	0	0	0	0	5
ILMN_2402930	LOC440926	0	0	0	0	0	5
ILMN_2402936	LOC440926	0	0	0	0	0	5
ILMN_1689712	LOC440927	0	0	0	0	0	5
ILMN_1716601	LOC441032	0	0	0	0	0	5
ILMN_1683498	LOC441034	0	0	0	0	0	5
ILMN_3290199	LOC441073	0	0	0	0	0.0038961	5
ILMN_1742163	LOC441087	0	0	0	0	0	5
ILMN_3200597	LOC441154	0.0012987	0	0.0376623	0.0012987	0.0298701	5
ILMN_1749907	LOC441241	0	0.00519481	0.0363636	0	0.00779221	5
ILMN_1793430	LOC441426	0.0493507	0.0272727	0.00519481	0	0.0038961	5
ILMN_3280020	LOC441506	0	0	0	0	0	5
ILMN_3201216	LOC441550	0	0	0	0	0	5
ILMN_3197732	LOC441642	0	0	0	0	0	5
ILMN_2110829	LOC441743	0	0	0	0	0	5
ILMN_1703337	LOC441763	0	0	0	0	0	5
ILMN_1695598	LOC441775	0	0	0	0	0	5
ILMN_1672320	LOC441907	0	0.0012987	0.0103896	0.0103896	0.0324675	5
ILMN_3201365	LOC442232	0	0	0	0	0	5
ILMN_3293503	LOC442270	0	0	0	0	0	5
ILMN_3248008	LOC442308	0	0	0.0142857	0	0.00649351	5
ILMN_3237507	LOC552889	0	0	0	0	0	5
ILMN_1780502	LOC641798	0.0116883	0.0116883	0.0025974	0.0025974	0	5
ILMN_3243297	LOC641814	0	0	0.0025974	0	0	5
ILMN_1697626	LOC641819	0.0012987	0.00519481	0.0025974	0.0116883	0.0038961	5
ILMN_1679025	LOC641848	0	0	0	0.0025974	0	5
ILMN_1701641	LOC642017	0.00909091	0.00519481	0	0.0025974	0.0298701	5
ILMN_1672830	LOC642082	0.0012987	0	0	0.0012987	0.0012987	5
ILMN_1715926	LOC642210	0	0	0	0	0	5
ILMN_1663416	LOC642250	0	0	0	0	0	5
ILMN_3283155	LOC642357	0	0	0	0	0	5
ILMN_1737297	LOC642377	0.0012987	0.00519481	0	0	0	5
ILMN_3202093	LOC642446	0.0012987	0	0	0.0012987	0.00909091	5
ILMN_3275771	LOC642567	0	0	0	0	0	5
ILMN_1799207	LOC642691	0.0012987	0.00519481	0	0	0.0012987	5
ILMN_3208229	LOC642738	0	0	0	0	0	5
ILMN_1765640	LOC642773	0	0	0	0.0025974	0.0103896	5
ILMN_1695034	LOC642817	0	0	0	0	0	5
ILMN_3291986	LOC642892	0	0	0	0	0	5
ILMN_1652242	LOC643206	0.0025974	0.0012987	0.0207792	0.00909091	0	5
ILMN_1739263	LOC643284	0	0	0	0	0	5
ILMN_1756139	LOC643310	0	0	0	0	0.00649351	5
ILMN_1760338	LOC643357	0	0	0	0	0	5
ILMN_3201480	LOC643358	0	0	0	0	0.0025974	5
ILMN_3200717	LOC643387	0	0	0	0	0	5
ILMN_1759872	LOC643509	0	0	0	0.0025974	0.0233766	5
ILMN_1664118	LOC643665	0	0	0	0	0	5
ILMN_1721659	LOC643668	0	0	0	0	0	5
ILMN_1718699	LOC643752	0	0	0	0	0	5
ILMN_1734031	LOC643757	0	0.00519481	0	0.0116883	0.00779221	5
ILMN_3290497	LOC643863	0	0	0	0	0	5
ILMN_1782611	LOC643870	0	0	0	0	0	5
ILMN_1665630	LOC643872	0	0	0	0	0	5
ILMN_1788272	LOC643935	0.0012987	0	0.0207792	0.0025974	0	5
ILMN_1759708	LOC643959	0	0.00519481	0	0.0025974	0.0025974	5
ILMN_1679280	LOC643997	0.025974	0	0.0285714	0	0	5
ILMN_1661917	LOC644039	0	0	0	0.0116883	0	5
ILMN_1795474	LOC644131	0	0.0012987	0	0	0.0467533	5
ILMN_1691402	LOC644162	0	0	0	0	0	5
ILMN_3209193	LOC644191	0	0	0	0	0	5
ILMN_3209676	LOC644315	0	0	0	0	0	5
ILMN_1676719	LOC644330	0	0	0	0	0	5
ILMN_1721895	LOC644338	0	0	0	0	0	5
ILMN_1796099	LOC644380	0	0	0	0	0	5
ILMN_3274677	LOC644384	0	0	0	0	0	5
ILMN_1742833	LOC644436	0	0	0	0	0	5
ILMN_3278906	LOC644464	0	0	0	0	0	5
ILMN_3202432	LOC644464	0	0	0	0	0	5
ILMN_1666853	LOC644482	0	0	0	0	0	5
ILMN_1789809	LOC644511	0	0	0	0	0	5
ILMN_1679044	LOC644584	0	0	0	0	0	5
ILMN_3201843	LOC644604	0	0	0	0	0	5
ILMN_1661743	LOC644760	0	0	0	0	0	5
ILMN_1719606	LOC644762	0	0	0	0	0	5
ILMN_1722409	LOC644816	0	0	0	0	0	5
ILMN_1661078	LOC644844	0.0012987	0	0.048052	0.0012987	0.0142857	5
ILMN_1701696	LOC644863	0	0	0	0	0	5
ILMN_3241051	LOC644907	0	0	0	0	0	5
ILMN_3282587	LOC644914	0	0	0	0	0	5
ILMN_3206343	LOC644914	0	0	0	0	0	5
ILMN_3248833	LOC644928	0	0	0	0	0	5
ILMN_1678522	LOC644934	0	0	0	0	0	5
ILMN_1675830	LOC644950	0	0	0.0103896	0.0142857	0.0012987	5
ILMN_1760089	LOC645018	0	0	0	0	0	5
ILMN_1756599	LOC645038	0	0.00519481	0.00519481	0.0194805	0.00649351	5
ILMN_3291921	LOC645086	0	0	0	0	0	5
ILMN_1676792	LOC645138	0	0	0	0	0	5
ILMN_3279322	LOC645174	0	0	0	0	0	5
ILMN_1705982	LOC645284	0.0012987	0	0	0.0025974	0.00909091	5
ILMN_1753925	LOC645609	0	0	0	0	0	5
ILMN_3288529	LOC645630	0	0	0	0.0324675	0.00909091	5
ILMN_1659771	LOC645683	0	0	0	0	0	5
ILMN_3213573	LOC645715	0	0	0	0	0	5
ILMN_3243334	LOC645762	0	0	0	0	0	5
ILMN_1726469	LOC646119	0	0	0	0	0	5
ILMN_1692916	LOC646135	0	0	0	0	0	5
ILMN_1776047	LOC646197	0	0	0	0	0	5
ILMN_3287178	LOC646272	0	0.0038961	0	0.0012987	0.0181818	5
ILMN_3294335	LOC646294	0	0	0	0	0	5
ILMN_3217815	LOC646294	0	0	0	0	0	5
ILMN_3198367	LOC646347	0	0	0	0	0	5
ILMN_1673738	LOC646483	0	0	0	0	0	5
ILMN_1805833	LOC646508	0	0.00519481	0	0	0.038961	5
ILMN_1669424	LOC646531	0	0	0	0	0	5
ILMN_1665970	LOC646562	0.0181818	0.00779221	0.038961	0.0116883	0.00649351	5
ILMN_1691449	LOC646630	0.0012987	0.00519481	0.00649351	0	0.0428571	5
ILMN_3205162	LOC646688	0	0	0	0	0	5
ILMN_3290019	LOC646753	0	0	0	0	0	5
ILMN_1775243	LOC646766	0	0	0	0	0	5
ILMN_3199655	LOC646784	0	0	0	0	0	5
ILMN_3210538	LOC646785	0	0	0	0	0	5
ILMN_3283742	LOC646791	0	0	0	0	0	5
ILMN_3199755	LOC646821	0	0	0.0311688	0	0	5
ILMN_3275033	LOC646841	0	0	0	0	0	5
ILMN_1692545	LOC646849	0	0	0	0	0.0194805	5
ILMN_1674021	LOC646869	0.0012987	0.00779221	0	0.0025974	0.0207792	5
ILMN_3279935	LOC646909	0	0	0	0	0	5
ILMN_3211302	LOC646909	0	0	0	0	0	5
ILMN_3200299	LOC646942	0	0	0	0	0	5
ILMN_3216979	LOC646949	0	0	0	0	0	5
ILMN_3219631	LOC647081	0	0	0	0	0	5
ILMN_3246292	LOC647099	0	0	0	0	0	5
ILMN_1663096	LOC647246	0.0012987	0.0012987	0	0.0038961	0.00909091	5
ILMN_3283573	LOC647276	0	0	0	0	0	5
ILMN_1687572	LOC647328	0	0	0.00519481	0.0025974	0	5
ILMN_1685774	LOC647340	0	0	0	0	0	5
ILMN_1658911	LOC647349	0	0	0	0	0	5
ILMN_1652230	LOC647361	0	0	0	0	0	5
ILMN_1772998	LOC647436	0	0	0	0	0	5
ILMN_1703369	LOC647474	0	0	0	0	0	5
ILMN_1795159	LOC647741	0	0	0	0	0	5
ILMN_1740088	LOC647920	0	0	0	0	0	5
ILMN_1667813	LOC648000	0	0	0	0.00779221	0.0038961	5
ILMN_1665736	LOC648024	0	0	0	0	0	5
ILMN_1682968	LOC648196	0	0	0	0	0.0467533	5
ILMN_1661346	LOC648210	0	0	0	0	0	5
ILMN_1709054	LOC648237	0	0	0	0	0	5
ILMN_1665148	LOC648249	0	0	0	0	0	5
ILMN_3208056	LOC648294	0	0	0	0	0	5
ILMN_3284570	LOC648294	0	0	0	0	0	5
ILMN_1690295	LOC648343	0	0	0	0	0	5
ILMN_3287583	LOC648390	0	0	0.0025974	0	0.0025974	5
ILMN_1652955	LOC648622	0	0	0	0	0	5
ILMN_1699011	LOC648682	0	0.0012987	0.0025974	0	0	5
ILMN_1783684	LOC648695	0	0	0	0	0	5
ILMN_3281563	LOC648771	0	0	0	0	0	5
ILMN_1806075	LOC648855	0	0	0.00519481	0.0025974	0.0012987	5
ILMN_1751726	LOC649049	0	0	0	0	0	5
ILMN_3238818	LOC649076	0	0	0	0	0	5
ILMN_1651680	LOC649150	0	0	0	0	0	5
ILMN_1741259	LOC649209	0	0	0	0	0.0116883	5
ILMN_1779765	LOC649318	0	0	0	0	0	5
ILMN_1672755	LOC649548	0	0	0	0	0	5
ILMN_1803799	LOC649555	0	0	0	0	0	5
ILMN_1700679	LOC649661	0.00909091	0.0116883	0.0207792	0.0025974	0.0194805	5
ILMN_1676036	LOC649679	0	0	0	0.0181818	0	5
ILMN_1671152	LOC649801	0	0	0	0	0	5
ILMN_3246097	LOC649839	0	0	0	0	0	5
ILMN_3203868	LOC649873	0	0	0	0	0	5
ILMN_1725407	LOC649956	0.0012987	0.0207792	0.0207792	0.0285714	0.0285714	5
ILMN_1778381	LOC650029	0	0	0	0	0	5
ILMN_1805300	LOC650132	0	0.0012987	0	0	0.0025974	5
ILMN_3287493	LOC650157	0	0	0	0	0	5
ILMN_1687738	LOC650276	0	0	0	0	0	5
ILMN_1737991	LOC650298	0	0	0	0	0	5
ILMN_1683664	LOC650369	0	0	0	0	0	5
ILMN_1675852	LOC650518	0	0	0	0.0012987	0.0142857	5
ILMN_1726647	LOC650646	0	0	0	0	0	5
ILMN_1812236	LOC650739	0	0	0	0	0	5
ILMN_1782417	LOC651064	0	0	0	0	0	5
ILMN_1660439	LOC651149	0	0	0	0.0025974	0.0428571	5
ILMN_3205924	LOC651198	0	0	0	0	0	5
ILMN_1679587	LOC651202	0	0	0	0	0	5
ILMN_1769277	LOC651436	0	0	0	0.0025974	0.0038961	5
ILMN_1709948	LOC651453	0	0	0	0	0	5
ILMN_1701871	LOC651520	0	0.0168831	0	0.0025974	0.0441558	5
ILMN_1729115	LOC651816	0	0	0	0	0	5
ILMN_1738249	LOC651820	0	0	0	0	0	5
ILMN_1687805	LOC651894	0	0	0	0	0	5
ILMN_1748265	LOC652048	0.0012987	0	0.0025974	0.00909091	0.0142857	5
ILMN_1683597	LOC652071	0	0	0	0	0	5
ILMN_1719415	LOC652140	0	0	0	0	0	5
ILMN_1692597	LOC652489	0	0	0	0	0	5
ILMN_1666564	LOC652489	0	0	0	0	0	5
ILMN_1764528	LOC652515	0.0012987	0	0.00779221	0.0025974	0.0038961	5
ILMN_1672961	LOC652624	0	0	0	0	0	5
ILMN_1800131	LOC652826	0.00909091	0.0493507	0.0454546	0.0285714	0.0103896	5
ILMN_1674364	LOC652839	0	0	0.00649351	0.00779221	0.00649351	5
ILMN_3215954	LOC653079	0	0	0	0	0	5
ILMN_1785900	LOC653108	0	0.0038961	0	0	0.0207792	5
ILMN_3208973	LOC653162	0	0	0	0	0	5
ILMN_1651606	LOC653210	0.0493507	0.00519481	0.00519481	0.0467533	0.0428571	5
ILMN_1708627	LOC653226	0	0	0	0	0	5
ILMN_1716014	LOC653232	0	0	0	0	0	5
ILMN_2053546	LOC653314	0	0	0	0	0	5
ILMN_1781481	LOC653325	0	0	0.0012987	0	0	5
ILMN_1806631	LOC653383	0	0	0	0	0	5
ILMN_1781601	LOC653421	0.0012987	0.00519481	0	0.0025974	0.00649351	5
ILMN_1766832	LOC653463	0	0.0116883	0.0025974	0	0.0220779	5
ILMN_1776260	LOC653505	0	0	0	0	0	5
ILMN_1720819	LOC653566	0	0	0	0	0	5
ILMN_1664706	LOC653604	0	0	0	0.00909091	0.00909091	5
ILMN_1658531	LOC653702	0	0	0	0	0	5
ILMN_1659405	LOC653773	0	0	0	0	0	5
ILMN_1701882	LOC653820	0	0.00649351	0	0	0.00519481	5
ILMN_1737586	LOC653994	0	0	0	0	0	5
ILMN_1729832	LOC653994	0	0	0	0	0	5
ILMN_1652459	LOC654161	0	0	0	0.0012987	0	5
ILMN_1696946	LOC654174	0	0	0	0	0	5
ILMN_1657022	LOC654174	0	0.0012987	0	0	0.0012987	5
ILMN_1725981	LOC654189	0	0	0	0	0	5
ILMN_3198499	LOC654350	0	0	0	0	0	5
ILMN_3231026	LOC654780	0	0	0	0	0	5
ILMN_1768558	LOC727848	0	0	0	0	0.0012987	5
ILMN_1799837	LOC727848	0	0	0.00519481	0	0	5
ILMN_3199737	LOC727865	0	0	0	0	0	5
ILMN_3276209	LOC727865	0	0	0	0.0025974	0	5
ILMN_3236249	LOC727877	0	0	0	0	0	5
ILMN_3296519	LOC728002	0	0	0	0	0	5
ILMN_3235036	LOC728024	0.00909091	0.025974	0.0350649	0.0038961	0.00779221	5
ILMN_3231881	LOC728026	0	0	0	0	0	5
ILMN_3287068	LOC728031	0	0	0	0	0	5
ILMN_3289090	LOC728059	0	0.0285714	0	0	0	5
ILMN_3276019	LOC728060	0	0	0	0	0	5
ILMN_3201445	LOC728128	0	0	0	0	0	5
ILMN_3212833	LOC728139	0	0	0	0	0	5
ILMN_3284607	LOC728207	0	0	0.00519481	0.0285714	0.00909091	5
ILMN_1785919	LOC728229	0.0038961	0.0025974	0.0012987	0	0.0012987	5
ILMN_3238782	LOC728244	0	0	0	0	0	5
ILMN_3228639	LOC728324	0	0	0	0	0	5
ILMN_3225941	LOC728368	0	0	0	0	0	5
ILMN_3297947	LOC728368	0	0	0	0	0	5
ILMN_3299478	LOC728428	0	0	0	0	0	5
ILMN_3298037	LOC728453	0.0012987	0	0	0.0038961	0.0324675	5
ILMN_1802761	LOC728505	0.0012987	0	0	0	0	5
ILMN_3234841	LOC728517	0	0	0	0	0	5
ILMN_3225505	LOC728553	0	0	0	0	0	5
ILMN_1771734	LOC728564	0	0	0	0	0	5
ILMN_3305899	LOC728572	0	0	0	0	0.00909091	5
ILMN_3227912	LOC728576	0	0	0	0	0	5
ILMN_3301065	LOC728590	0	0	0	0	0	5
ILMN_3305993	LOC728602	0	0	0	0	0	5
ILMN_3232828	LOC728620	0	0	0	0	0	5
ILMN_3297317	LOC728658	0	0	0	0	0	5
ILMN_3220792	LOC728658	0	0	0	0	0	5
ILMN_3223317	LOC728666	0	0	0	0	0	5
ILMN_3300744	LOC728666	0	0	0	0	0	5
ILMN_3224907	LOC728672	0	0	0	0	0	5
ILMN_3228108	LOC728693	0	0	0	0	0	5
ILMN_3298070	LOC728698	0	0	0.0415584	0.0038961	0.00519481	5
ILMN_3226012	LOC728698	0	0	0	0	0	5
ILMN_3225634	LOC728782	0	0	0	0	0	5
ILMN_3299187	LOC728782	0	0	0	0	0	5
ILMN_1667970	LOC728825	0	0	0	0	0	5
ILMN_3298582	LOC728873	0	0	0	0	0	5
ILMN_3244395	LOC728877	0	0	0	0	0	5
ILMN_3248758	LOC728934	0.012987	0.025974	0	0	0.00909091	5
ILMN_3229652	LOC728953	0	0	0	0	0	5
ILMN_3300190	LOC728992	0.0012987	0	0.0025974	0.0025974	0.0194805	5
ILMN_1749612	LOC729101	0	0	0	0.0012987	0	5
ILMN_3304022	LOC729102	0	0	0	0	0	5
ILMN_3304130	LOC729236	0	0	0	0	0	5
ILMN_3226899	LOC729259	0	0	0	0.0103896	0	5
ILMN_3301324	LOC729301	0	0	0.0025974	0	0	5
ILMN_3221807	LOC729313	0	0	0	0	0	5
ILMN_1699253	LOC729317	0	0	0	0	0	5
ILMN_3304203	LOC729342	0	0	0	0	0	5
ILMN_3230260	LOC729348	0.00519481	0.0207792	0.0363636	0.0025974	0.0038961	5
ILMN_3299365	LOC729406	0	0	0	0	0	5
ILMN_3304887	LOC729423	0	0	0	0	0	5
ILMN_1809347	LOC729466	0	0	0	0	0	5
ILMN_3229570	LOC729500	0	0	0	0	0	5
ILMN_3245578	LOC729510	0	0	0	0	0.00519481	5
ILMN_3226814	LOC729646	0	0	0	0	0	5
ILMN_3225449	LOC729677	0	0	0	0	0	5
ILMN_3226613	LOC729686	0	0	0	0	0	5
ILMN_3302139	LOC729687	0	0	0	0	0	5
ILMN_1691106	LOC729692	0	0	0	0	0	5
ILMN_3235118	LOC729760	0	0	0	0	0	5
ILMN_1686060	LOC729777	0	0	0	0	0	5
ILMN_3227732	LOC729789	0	0	0	0	0	5
ILMN_3302905	LOC729798	0	0	0	0	0	5
ILMN_3224952	LOC729903	0	0	0	0	0	5
ILMN_3239659	LOC729907	0.0012987	0	0	0.0025974	0	5
ILMN_3227250	LOC729941	0	0	0	0	0	5
ILMN_3220769	LOC729964	0	0	0	0	0	5
ILMN_3227994	LOC729992	0	0	0	0	0	5
ILMN_3225784	LOC730029	0	0	0	0	0	5
ILMN_3302456	LOC730029	0	0	0	0	0	5
ILMN_3306482	LOC730107	0	0	0	0	0.0012987	5
ILMN_3225309	LOC730176	0	0	0	0	0	5
ILMN_3296979	LOC730187	0	0	0.00779221	0	0.0025974	5
ILMN_1829131	LOC730226	0.0142857	0.00519481	0.0142857	0.0012987	0.0103896	5
ILMN_3305949	LOC730246	0	0	0	0	0	5
ILMN_3235013	LOC730288	0.0142857	0.0025974	0.0103896	0.0012987	0	5
ILMN_3234116	LOC730382	0	0	0	0	0	5
ILMN_1748767	LOC730740	0	0	0	0	0.00519481	5
ILMN_1680437	LOC731096	0	0	0	0	0	5
ILMN_1656662	LOC731365	0	0	0	0.0116883	0	5
ILMN_3227321	LOC731542	0	0	0	0	0	5
ILMN_1814011	LOC731985	0	0	0	0	0	5
ILMN_1700025	LOC732007	0	0	0	0	0	5
ILMN_1652160	LRBA	0	0	0	0	0	5
ILMN_1670272	LRP10	0	0	0	0	0	5
ILMN_2214997	LRRFIP1	0	0	0	0	0.00519481	5
ILMN_1682368	LRWD1	0	0	0	0	0	5
ILMN_1734428	LSM12	0	0	0	0	0	5
ILMN_1719032	LSM3	0	0	0	0	0	5
ILMN_2229242	LSM3	0	0	0	0	0	5
ILMN_1690342	LTA4H	0	0	0	0	0	5
ILMN_1677920	LTF	0.0168831	0.00519481	0.0454546	0.012987	0.0454546	5
ILMN_1714159	LUZP1	0	0	0	0	0	5
ILMN_1666713	LYPLA1	0	0	0	0	0	5
ILMN_1662824	MADCAM1	0.0012987	0	0.0025974	0.012987	0.0025974	5
ILMN_1775522	MAGED1	0	0	0	0	0	5
ILMN_2306189	MAGED1	0	0	0	0	0	5
ILMN_2205032	MAGEE1	0	0	0.0012987	0.0025974	0	5
ILMN_1657478	MAGEL2	0	0	0	0	0	5
ILMN_1663986	MAGI3	0	0	0	0	0	5
ILMN_1781104	MAP2K7	0	0	0	0.0025974	0.0103896	5
ILMN_1723020	MAP3K1	0	0	0	0	0	5
ILMN_1651788	MAP3K11	0	0	0	0	0.00909091	5
ILMN_1724070	MAP3K14	0	0.00519481	0	0	0	5
ILMN_1678087	MAP3K4	0	0	0	0.0103896	0	5
ILMN_1767320	MAPK1	0	0	0	0	0	5
ILMN_2339655	MAPK7	0	0	0	0	0	5
ILMN_1691526	MAPKAP1	0	0	0	0.0012987	0	5
ILMN_1774844	MAPKAPK2	0	0	0	0	0	5
ILMN_1777721	MAPRE1	0	0	0	0	0	5
ILMN_1807042	MARCKS	0	0	0	0	0	5
ILMN_1714433	MARCKSL1	0	0	0	0	0	5
ILMN_1737298	MAT2A	0	0	0	0	0	5
ILMN_1815107	MATR3	0	0	0	0	0	5
ILMN_1706546	MAX	0.012987	0.0272727	0	0	0	5
ILMN_1684316	MBNL2	0	0	0	0	0	5
ILMN_2101651	MBTD1	0	0	0	0	0	5
ILMN_1767256	MBTPS1	0	0	0.0142857	0.0116883	0.0142857	5
ILMN_1715745	MCART6	0	0	0	0	0	5
ILMN_1806818	MCM3	0	0	0	0	0	5
ILMN_1713147	MCRS1	0	0	0.00519481	0	0	5
ILMN_1656913	MDH1	0	0	0	0	0	5
ILMN_2079004	MDH2	0	0	0	0	0	5
ILMN_1727073	MEA1	0	0	0	0	0	5
ILMN_3248122	MED1	0.0012987	0	0.0233766	0.0025974	0.0181818	5
ILMN_1793386	MED12	0	0	0	0	0	5
ILMN_1792860	MED22	0	0	0	0	0	5
ILMN_1811823	MED25	0	0	0	0	0	5
ILMN_1671603	MED30	0	0	0	0	0	5
ILMN_3229552	MED7	0	0	0	0	0	5
ILMN_3306173	MED7	0.0025974	0.0207792	0	0.0233766	0.0337662	5
ILMN_1736847	MED8	0	0	0	0	0	5
ILMN_1705685	MEIS1	0	0	0	0	0	5
ILMN_1695945	MEIS2	0	0	0	0	0	5
ILMN_2398077	MEIS2	0	0.0012987	0	0.0142857	0	5
ILMN_2278590	MEST	0	0	0	0	0	5
ILMN_1715175	MET	0	0	0	0.0012987	0	5
ILMN_2258004	METRNL	0.012987	0.00779221	0.0441558	0.0246753	0.0441558	5
ILMN_1782257	METT11D1	0	0	0	0	0	5
ILMN_1691570	METTL5	0	0.00519481	0	0.0025974	0.038961	5
ILMN_3239177	MEX3A	0.0025974	0.0012987	0	0	0	5
ILMN_1766914	MFAP4	0	0.0038961	0	0.0025974	0	5
ILMN_1744623	MGC57359	0.0298701	0.00779221	0.0142857	0	0	5
ILMN_1801168	MGC57359	0.0181818	0.00519481	0.0454546	0.0142857	0.0298701	5
ILMN_1658847	MGC61598	0	0	0	0	0	5
ILMN_1751956	MGST3	0.0012987	0	0.0337662	0.0025974	0	5
ILMN_2282077	MIB2	0	0	0	0	0	5
ILMN_1668960	MID1IP1	0	0	0	0	0	5
ILMN_1807074	MIF	0	0	0	0	0	5
ILMN_3309164	MIR1185-1	0	0.0012987	0	0	0	5
ILMN_3310306	MIR1224	0.0025974	0	0	0	0	5
ILMN_3308743	MIR125B2	0.00519481	0.0012987	0	0.0025974	0.00909091	5
ILMN_3310151	MIR1909	0	0	0.0454546	0	0.0038961	5
ILMN_3309664	MIR300	0.00909091	0	0	0.012987	0.00519481	5
ILMN_3310386	MIR345	0.0142857	0	0.00519481	0.0116883	0.0012987	5
ILMN_3309514	MIR574	0	0.0012987	0	0	0	5
ILMN_3310371	MIR939	0	0.00519481	0	0	0	5
ILMN_1654060	MKNK2	0	0	0	0.0103896	0.0142857	5
ILMN_1783606	MLL5	0	0	0	0	0	5
ILMN_1789240	MLST8	0	0	0	0	0	5
ILMN_1689156	MMAB	0	0.0025974	0.0142857	0	0.00649351	5
ILMN_1792910	MNT	0	0	0	0	0	5
ILMN_1812726	MORF4L1	0	0.0207792	0.0025974	0.038961	0.0103896	5
ILMN_1805345	MOSPD3	0.0012987	0	0	0.0012987	0.00909091	5
ILMN_1652085	MPHOSPH10	0	0	0	0	0	5
ILMN_2193214	MPND	0	0	0.00519481	0	0.0220779	5
ILMN_1714980	MRGPRD	0.00519481	0	0	0.0012987	0	5
ILMN_1699603	MRPL12	0	0	0	0	0	5
ILMN_1730685	MRPL16	0	0	0	0	0	5
ILMN_1806123	MRPL23	0.00909091	0	0.0311688	0	0	5
ILMN_1726743	MRPS30	0	0	0	0	0	5
ILMN_1654552	MRPS31	0	0	0	0	0	5
ILMN_1670723	MSL3	0.0038961	0.00779221	0	0	0.0298701	5
ILMN_1676159	MST4	0	0.00519481	0	0.0038961	0.00779221	5
ILMN_1691156	MT1A	0	0	0	0	0	5
ILMN_1785324	MTHFD1	0	0	0	0	0	5
ILMN_1739641	MTMR3	0	0	0	0	0	5
ILMN_2180682	MTPN	0	0	0	0	0	5
ILMN_2073289	MTSS1	0	0	0	0	0	5
ILMN_1719403	MTX1	0	0.0194805	0	0	0.00909091	5
ILMN_1680618	MYC	0	0	0	0	0	5
ILMN_1815154	MYH10	0	0	0	0	0	5
ILMN_1805526	MYL1	0	0	0	0	0	5
ILMN_1809013	MYL6	0	0	0	0.0025974	0	5
ILMN_2158548	NACA2	0	0.00519481	0	0	0.0181818	5
ILMN_3244960	NACC1	0	0	0	0	0	5
ILMN_1689665	NAE1	0	0	0	0	0	5
ILMN_1689097	NAT5	0	0	0	0	0	5
ILMN_1705346	NBEA	0	0	0	0	0	5
ILMN_1777528	NCBP1	0	0	0	0	0	5
ILMN_2359500	NCDN	0.0012987	0.00519481	0.0038961	0.0116883	0.0103896	5
ILMN_1724718	NCK2	0	0	0.0025974	0.0116883	0.0181818	5
ILMN_2121437	NCL	0	0	0	0	0	5
ILMN_1695422	NCL	0	0	0	0	0	5
ILMN_3243274	NCRNA00200	0.00909091	0.0012987	0	0	0	5
ILMN_1735180	NCSTN	0	0	0.00779221	0.0025974	0	5
ILMN_1767139	NDUFA13	0	0	0	0	0	5
ILMN_1754421	NDUFAF1	0	0	0	0	0	5
ILMN_1813604	NDUFB7	0	0	0	0	0	5
ILMN_1812312	NDUFS4	0	0.00779221	0	0.0012987	0	5
ILMN_1794132	NDUFS8	0	0	0	0	0	5
ILMN_1786718	NDUFV1	0	0	0	0	0	5
ILMN_1749738	NECAB3	0	0.00519481	0	0	0	5
ILMN_2058070	NEDD8	0	0	0	0	0	5
ILMN_1696702	NEO1	0	0	0	0	0	5
ILMN_1778991	NFIB	0	0	0	0	0	5
ILMN_1654942	NFIC	0	0	0	0	0	5
ILMN_1694325	NFIX	0	0	0	0	0	5
ILMN_1773154	NFKBIA	0	0	0	0	0	5
ILMN_1761314	NFS1	0	0	0	0	0	5
ILMN_2406468	NFU1	0	0.00519481	0	0.0116883	0.0493507	5
ILMN_1690049	NGDN	0	0	0	0	0	5
ILMN_1729208	NGFRAP1	0	0	0	0	0	5
ILMN_2264625	NIPBL	0	0	0	0	0	5
ILMN_1741133	NME1	0	0	0	0	0	5
ILMN_1662905	NME1-NME2	0	0	0	0	0	5
ILMN_1657884	NME2	0	0.0038961	0	0	0	5
ILMN_1799856	NOMO2	0	0	0	0	0	5
ILMN_1787628	NOP56	0	0	0	0	0	5
ILMN_2199313	NPDC1	0	0	0	0.0025974	0	5
ILMN_2336982	NPTN	0.0012987	0.00779221	0.0272727	0.00909091	0.0038961	5
ILMN_1745785	NR2F2	0	0	0	0	0	5
ILMN_1697666	NRARP	0	0	0.0025974	0	0	5
ILMN_1670096	NRBP1	0	0	0	0	0	5
ILMN_1718629	NRIP1	0	0	0	0.0012987	0	5
ILMN_1687392	NRK	0	0.00519481	0	0	0.0142857	5
ILMN_1665319	NRTN	0	0	0	0.0116883	0	5
ILMN_1738684	NRXN2	0	0.00519481	0	0	0.0350649	5
ILMN_1680687	NSF	0	0	0	0.0025974	0.0012987	5
ILMN_1708743	NT5DC2	0	0	0	0	0	5
ILMN_1815924	NUP107	0	0	0	0	0	5
ILMN_1705907	NUP153	0	0	0	0	0	5
ILMN_1734826	NUP88	0	0	0	0	0	5
ILMN_1745669	NY-REN-7	0.0207792	0.00519481	0	0.0142857	0	5
ILMN_1658247	OAS1	0	0.0038961	0	0	0	5
ILMN_2364828	OGT	0	0	0	0	0	5
ILMN_2072401	OR11H1	0	0	0	0.0116883	0.0181818	5
ILMN_1716249	OR1K1	0	0	0	0	0	5
ILMN_1738976	OR2A20P	0.0012987	0	0	0	0	5
ILMN_1744109	OR2A42	0.0272727	0	0	0	0	5
ILMN_1702824	OR52W1	0	0	0	0	0.0142857	5
ILMN_1739155	OR9A4	0.0155844	0.0012987	0	0	0.0025974	5
ILMN_1705093	ORC5L	0	0	0	0	0	5
ILMN_2405602	OSBPL1A	0	0	0.0025974	0	0.00909091	5
ILMN_2313856	OSBPL9	0	0	0	0	0	5
ILMN_1742456	OSTF1	0.0012987	0	0	0	0	5
ILMN_1663347	OTOF	0	0	0	0	0.00909091	5
ILMN_2354855	OTUB1	0	0	0	0	0	5
ILMN_1677610	OVCA2	0	0	0	0.0025974	0	5
ILMN_1692936	OVOL1	0.0012987	0	0.0025974	0.0012987	0	5
ILMN_2136133	PABPC1	0	0	0	0	0	5
ILMN_1761155	PABPC1	0	0	0	0	0.00519481	5
ILMN_1718128	PABPC3	0	0	0	0	0	5
ILMN_1757343	PABPC4	0	0	0	0	0	5
ILMN_1796926	PABPC5	0	0	0	0	0	5
ILMN_1759154	PABPN1	0	0	0	0	0	5
ILMN_1782094	PAIP2	0	0	0	0	0.025974	5
ILMN_2313901	PAM	0	0	0	0	0	5
ILMN_1798354	PAPOLA	0	0	0	0	0	5
ILMN_1686871	PARP1	0	0	0	0	0	5
ILMN_1771832	PARP6	0	0	0	0	0	5
ILMN_2312296	PCBP2	0	0	0	0	0	5
ILMN_1724825	PCBP2	0	0	0	0	0	5
ILMN_1805132	PCDH19	0	0	0	0	0	5
ILMN_1666659	PCDHA1	0.0324675	0.00519481	0.0220779	0.0142857	0.00909091	5
ILMN_1690487	PCM1	0	0	0	0	0.0038961	5
ILMN_1740010	PCNX	0	0	0	0.0025974	0.00909091	5
ILMN_1699545	PCSK7	0	0	0.0298701	0.0012987	0.0025974	5
ILMN_1797684	PDCD2	0	0	0	0	0	5
ILMN_2228710	PDCD5	0	0	0	0	0	5
ILMN_2342695	PDGFA	0	0	0	0	0	5
ILMN_1685982	PDGFA	0	0	0	0	0	5
ILMN_1695763	PDIA5	0	0	0	0	0	5
ILMN_1680626	PDIA6	0	0	0	0	0	5
ILMN_1814985	PDLIM7	0	0	0	0	0	5
ILMN_1690125	PDLIM7	0	0	0	0	0	5
ILMN_2387799	PDPK1	0	0	0	0	0	5
ILMN_1729650	PEX7	0.0181818	0	0.00779221	0.0012987	0.0038961	5
ILMN_1661490	PFDN6	0	0	0	0	0	5
ILMN_1660847	PFKFB3	0	0	0	0	0	5
ILMN_1712950	PFN1	0	0	0	0	0	5
ILMN_2151817	PFN1	0	0	0	0	0	5
ILMN_1775448	PFN2	0	0	0	0	0	5
ILMN_1661366	PGAM1	0	0	0	0	0	5
ILMN_2112417	PGAM1	0	0	0	0	0	5
ILMN_2161955	PGK2	0	0	0	0	0	5
ILMN_2401769	PHF14	0	0	0	0	0.0025974	5
ILMN_1655194	PHF17	0	0	0	0	0	5
ILMN_1756676	PHF19	0	0	0.00649351	0.0116883	0.0012987	5
ILMN_1726426	PHF2	0	0.0012987	0	0.0116883	0.00649351	5
ILMN_1694799	PIAS2	0	0	0	0	0	5
ILMN_1802905	PIAS4	0	0	0	0	0	5
ILMN_1715273	PICALM	0	0	0	0	0	5
ILMN_1799860	PIGM	0.0246753	0.0194805	0.0025974	0.0246753	0.00649351	5
ILMN_2052891	PKD2	0	0	0	0	0	5
ILMN_1672650	PKM2	0	0	0	0	0	5
ILMN_1766658	PKMYT1	0	0	0	0	0	5
ILMN_1661325	PKP4	0	0.00779221	0.025974	0.0285714	0.0025974	5
ILMN_2397294	PLCB4	0	0	0	0	0	5
ILMN_2105033	PLDN	0.0012987	0.0194805	0	0.00909091	0.00779221	5
ILMN_1796339	PLEKHA2	0.0012987	0.00519481	0.00779221	0.0012987	0.0038961	5
ILMN_2106449	PLEKHF2	0.0012987	0	0.00779221	0.00909091	0.00519481	5
ILMN_1736176	PLK1	0	0	0	0	0	5
ILMN_1799139	PLOD2	0	0	0	0	0.0038961	5
ILMN_1790106	PLP1	0.0012987	0.00779221	0	0.0402597	0.00649351	5
ILMN_1749634	PLRG1	0	0	0	0	0	5
ILMN_1763447	PLXNB2	0	0	0	0	0	5
ILMN_1792589	PMCHL1	0.00909091	0.0025974	0.0415584	0.0103896	0.0103896	5
ILMN_1652161	PNKD	0.0025974	0	0	0	0	5
ILMN_2276758	POFUT1	0	0	0	0	0	5
ILMN_3305304	POLD2	0	0	0	0	0	5
ILMN_1745885	POLR2F	0	0	0	0	0	5
ILMN_1720542	POLR2I	0	0	0	0	0.0038961	5
ILMN_1677768	POR	0.0012987	0.025974	0.0025974	0	0.00779221	5
ILMN_1805827	PPA1	0	0	0	0	0	5
ILMN_2343278	PPAP2A	0	0	0	0.0116883	0.00649351	5
ILMN_1767281	PPBP	0.0012987	0.0207792	0.0025974	0.0337662	0.0025974	5
ILMN_3236259	PPIAL4A	0	0	0	0	0	5
ILMN_1680341	PPIE	0	0	0	0	0	5
ILMN_1729690	PPIL2	0	0	0.0155844	0	0	5
ILMN_2410516	PPM1A	0	0	0	0	0	5
ILMN_1806867	PPM1G	0	0	0	0	0	5
ILMN_1701855	PPP1CC	0	0	0	0	0	5
ILMN_1659888	PPP1R14B	0	0	0	0	0	5
ILMN_1712659	PPP2CB	0	0	0	0	0	5
ILMN_1810467	PPP2R1A	0	0.0012987	0.0454546	0.0012987	0.0025974	5
ILMN_1788961	PPP2R2A	0	0	0	0	0	5
ILMN_1662617	PPP2R3C	0	0	0	0	0	5
ILMN_1789283	PPP2R5C	0	0	0	0	0	5
ILMN_1666761	PPP2R5E	0	0	0	0	0	5
ILMN_1802669	PPP3CB	0	0	0	0	0	5
ILMN_1796962	PPP3R1	0	0	0	0	0	5
ILMN_2345512	PPP4R1	0	0	0	0	0	5
ILMN_1660337	PPT2	0	0.00519481	0.0025974	0	0.00519481	5
ILMN_1750664	PPT2	0	0	0	0	0	5
ILMN_1720578	PRAF2	0.0012987	0	0	0	0	5
ILMN_1809818	PRCC	0	0	0	0.0025974	0	5
ILMN_2366391	PRDX1	0	0	0	0	0	5
ILMN_2222234	PRDX4	0	0	0	0	0	5
ILMN_1815024	PRDX5	0	0	0	0	0	5
ILMN_1813594	PREI3	0	0	0	0	0	5
ILMN_1694502	PRIM1	0	0	0	0	0	5
ILMN_1716563	PRKCB1	0	0	0	0	0	5
ILMN_1777794	PRKCSH	0	0	0	0	0	5
ILMN_1737813	PRNPIP	0	0	0	0	0	5
ILMN_1715392	PRPF3	0	0	0	0	0	5
ILMN_1655155	PRPS1L1	0	0	0	0	0	5
ILMN_1669718	PSENEN	0	0	0	0	0	5
ILMN_2387553	PSMA3	0	0.00519481	0	0	0	5
ILMN_1759952	PSMA5	0	0	0	0	0	5
ILMN_1789176	PSMB1	0	0	0	0	0	5
ILMN_1764794	PSMB2	0	0	0.0311688	0	0	5
ILMN_1748651	PSMB3	0	0	0	0	0	5
ILMN_1744649	PSMB5	0	0	0	0	0	5
ILMN_1710406	PSMC1	0	0	0	0	0	5
ILMN_2396948	PSMC3IP	0	0	0	0	0	5
ILMN_2395389	PSMC4	0	0	0	0	0	5
ILMN_1687887	PSMC4	0	0	0	0	0	5
ILMN_1780189	PSMC5	0	0	0.0012987	0	0.0038961	5
ILMN_1655316	PSMC6	0	0	0	0	0	5
ILMN_2281128	PSMD10	0	0	0	0	0	5
ILMN_2383435	PSMD10	0	0	0	0	0	5
ILMN_1800952	PSMD11	0	0	0	0	0	5
ILMN_1737396	PSMD14	0	0	0	0	0	5
ILMN_1712432	PSMD2	0	0	0	0	0	5
ILMN_2344130	PSMD4	0	0	0	0	0	5
ILMN_1728355	PSMD4	0	0	0	0	0	5
ILMN_3307799	PSMD4	0	0	0	0	0	5
ILMN_3224204	PSMG4	0	0	0	0	0	5
ILMN_1776105	PSPH	0	0	0	0	0	5
ILMN_2142979	PTBP2	0	0	0	0	0	5
ILMN_1707240	PTBP2	0	0	0	0	0	5
ILMN_1759954	PTMA	0	0	0	0	0	5
ILMN_2154654	PTP4A1	0	0	0	0	0	5
ILMN_2338997	PTP4A2	0	0	0	0	0	5
ILMN_1662427	PTP4A3	0.012987	0	0.0350649	0	0.0025974	5
ILMN_2222074	PTPN12	0	0	0	0	0	5
ILMN_2400030	PTPN2	0	0	0	0	0	5
ILMN_1694923	PTPN9	0	0	0.00519481	0.0116883	0	5
ILMN_1762766	PTPRA	0	0	0	0	0	5
ILMN_1695461	PTPRA	0.0012987	0.00519481	0.025974	0.0025974	0.0220779	5
ILMN_1676616	PTPRZ1	0	0	0	0	0	5
ILMN_2311548	PTRH2	0	0	0.0025974	0	0	5
ILMN_1750079	PURB	0	0	0	0	0	5
ILMN_1810591	PUS10	0	0	0	0	0	5
ILMN_1694147	PUS3	0	0	0	0	0	5
ILMN_1718303	PVRL2	0	0	0	0	0	5
ILMN_1799015	PXMP2	0	0	0	0	0	5
ILMN_1664025	PXMP4	0	0	0	0	0	5
ILMN_1684440	PXN	0	0	0	0	0	5
ILMN_1696187	PYGL	0	0.00779221	0	0	0.0038961	5
ILMN_1773485	QKI	0	0	0	0	0	5
ILMN_1690476	QKI	0	0	0	0.0142857	0.00909091	5
ILMN_1735474	R3HCC1	0.025974	0.00519481	0.0220779	0.0025974	0.0324675	5
ILMN_2052383	R3HDM1	0	0.00649351	0.0285714	0.00909091	0	5
ILMN_1793433	RAB10	0	0	0	0	0	5
ILMN_2081210	RAB12	0	0	0	0	0	5
ILMN_1677843	RAB24	0	0	0	0	0	5
ILMN_1810486	RAB34	0	0	0	0	0	5
ILMN_1716524	RAB7A	0	0.0194805	0	0	0.00779221	5
ILMN_1779710	RAB9P1	0	0	0	0	0	5
ILMN_2207363	RABAC1	0	0	0	0	0	5
ILMN_1790354	RABGGTB	0	0	0	0	0	5
ILMN_1760635	RAD51C	0	0.0025974	0	0	0.0012987	5
ILMN_1739810	RAI1	0.00649351	0.00519481	0	0	0.0025974	5
ILMN_1755364	RALA	0	0	0	0	0	5
ILMN_3307930	RAN	0	0	0	0	0	5
ILMN_1667306	RANBP10	0.0012987	0.0454546	0.0363636	0.0467533	0.0493507	5
ILMN_2141157	RANBP9	0	0	0	0.0025974	0	5
ILMN_3242120	RAP1BL	0	0	0	0	0	5
ILMN_3247261	RAPGEF2	0	0	0	0	0	5
ILMN_1751378	RARS	0	0	0	0	0	5
ILMN_3249546	RASA4P	0	0.00519481	0	0	0.00649351	5
ILMN_1788813	RASL10B	0.0207792	0.0181818	0.00779221	0	0.0350649	5
ILMN_2148469	RASL11B	0	0.0038961	0	0	0	5
ILMN_1683239	RASSF1	0	0.0012987	0	0.0012987	0	5
ILMN_2362902	RASSF5	0	0	0	0	0	5
ILMN_1653514	RBBP4	0.0012987	0.00519481	0	0	0.0103896	5
ILMN_2363621	RBBP8	0	0	0	0	0	5
ILMN_1668065	RBED1	0.0337662	0.0012987	0	0	0	5
ILMN_2329834	RBM12	0	0	0	0	0	5
ILMN_1802355	RBM18	0	0	0	0	0	5
ILMN_1757439	RBM4	0	0	0	0	0	5
ILMN_1743104	RBM4B	0	0	0	0	0	5
ILMN_1745130	RBM9	0	0	0	0	0	5
ILMN_2358541	RBMS1	0	0	0	0.0363636	0.0142857	5
ILMN_2124951	RBMX	0	0	0	0	0	5
ILMN_1678203	RBMX2	0	0	0	0	0	5
ILMN_1765532	RDBP	0	0.0012987	0	0.0012987	0.0194805	5
ILMN_1780057	RENBP	0	0	0	0	0	5
ILMN_1753008	REXO1	0	0	0	0	0	5
ILMN_2370365	RFC4	0	0	0	0	0	5
ILMN_3251477	RG9MTD3	0.0012987	0.00519481	0	0	0	5
ILMN_1717636	RGMA	0	0	0	0	0	5
ILMN_1668559	RGS10	0	0	0	0	0	5
ILMN_1735792	RHBDF2	0	0	0	0	0	5
ILMN_2338480	RHOT1	0	0	0	0	0.0142857	5
ILMN_3245707	RIMKLB	0	0.0272727	0	0	0.0376623	5
ILMN_1680018	RIPK4	0.0220779	0	0.00649351	0.0467533	0.0038961	5
ILMN_3234762	RN5S9	0	0	0	0	0	5
ILMN_2041368	RN7SL1	0	0	0	0	0	5
ILMN_1782488	RNASEH2B	0	0	0	0	0	5
ILMN_3247728	RNF115	0.0012987	0	0	0.025974	0.0116883	5
ILMN_1792389	RNF165	0	0	0	0	0	5
ILMN_1812327	RNF19A	0	0	0	0	0	5
ILMN_2381197	RNF19A	0.00909091	0.00519481	0.00519481	0.0012987	0.0038961	5
ILMN_2070210	RNF219	0	0	0	0	0	5
ILMN_1660079	RNF44	0	0	0	0	0	5
ILMN_1684549	RNPC2	0	0	0	0	0	5
ILMN_3246273	RNU1-3	0	0	0	0	0	5
ILMN_3236653	RNU1-5	0	0	0	0	0	5
ILMN_3245678	RNU1A3	0	0	0	0	0	5
ILMN_3240220	RNU1F1	0	0	0	0	0	5
ILMN_3244646	RNU1G2	0	0	0	0	0	5
ILMN_3308335	RNU6-1	0	0	0	0	0	5
ILMN_3310351	RNU6-15	0	0	0	0	0	5
ILMN_3308310	RNU86	0	0	0	0	0	5
ILMN_1723743	ROM1	0	0	0	0	0	5
ILMN_3234993	ROMO1	0	0	0	0	0	5
ILMN_1702055	ROPN1B	0.0012987	0.00519481	0.0025974	0.0142857	0.0103896	5
ILMN_1787830	RP11-49G10.8	0.0324675	0.00909091	0.0116883	0.0025974	0.00649351	5
ILMN_2154566	RPL10A	0	0	0	0	0	5
ILMN_1672446	RPL11	0	0	0	0	0	5
ILMN_2114876	RPL11	0	0	0	0	0	5
ILMN_2116366	RPL12	0	0	0	0	0	5
ILMN_1653469	RPL12	0	0	0	0	0	5
ILMN_3226244	RPL12P6	0	0	0	0	0	5
ILMN_3302177	RPL14L	0	0	0	0	0	5
ILMN_2383097	RPL17	0	0	0	0	0	5
ILMN_2230624	RPL18	0	0	0	0	0	5
ILMN_2290808	RPL21	0	0	0	0	0	5
ILMN_2124757	RPL23AP13	0	0	0	0	0	5
ILMN_2222750	RPL23AP7	0	0	0	0	0	5
ILMN_2160388	RPL24	0	0	0	0	0	5
ILMN_2110532	RPL26L1	0	0	0	0.0168831	0.0038961	5
ILMN_1656807	RPL27	0	0	0	0	0	5
ILMN_1713086	RPL27A	0	0	0	0	0	5
ILMN_2319994	RPL3	0	0	0	0	0	5
ILMN_2319996	RPL3	0.0012987	0	0	0	0	5
ILMN_1754303	RPL30	0	0	0	0	0	5
ILMN_1754195	RPL31	0	0	0	0	0	5
ILMN_1756360	RPL35A	0	0	0	0	0	5
ILMN_1690494	RPL6	0	0	0	0	0	5
ILMN_1815292	RPL7	0	0	0	0	0	5
ILMN_1709880	RPLP0	0	0	0	0	0	5
ILMN_1689725	RPLP1	0	0	0	0	0	5
ILMN_2247594	RPLP1	0	0	0	0	0	5
ILMN_1755733	RPLP2	0	0	0	0	0	5
ILMN_1810423	RPP40	0	0	0	0	0	5
ILMN_1777906	RPRC1	0	0	0	0	0	5
ILMN_1686954	RPS10	0	0	0	0	0	5
ILMN_1782621	RPS12	0	0	0	0	0	5
ILMN_1666635	RPS14	0	0	0	0	0	5
ILMN_2338785	RPS14	0	0	0	0	0	5
ILMN_2219134	RPS15	0.00909091	0	0	0.0194805	0.00519481	5
ILMN_1787949	RPS15A	0	0	0	0.0012987	0.00649351	5
ILMN_1651850	RPS16	0	0	0	0	0	5
ILMN_2207539	RPS17	0	0	0	0	0	5
ILMN_2207533	RPS17	0.0246753	0.00519481	0	0.0025974	0.0233766	5
ILMN_1784717	RPS19	0	0	0	0	0	5
ILMN_1701596	RPS20	0	0	0	0	0	5
ILMN_1656625	RPS24	0	0	0	0	0	5
ILMN_2209027	RPS26	0	0	0	0	0	5
ILMN_1695585	RPS26L	0	0	0	0	0.0012987	5
ILMN_2310703	RPS26L	0	0	0	0	0	5
ILMN_1750636	RPS26L	0	0	0	0	0	5
ILMN_2180866	RPS26P11	0	0	0	0	0	5
ILMN_1660498	RPS27	0	0	0	0	0	5
ILMN_2160819	RPS27	0	0	0	0	0	5
ILMN_1696839	RPS27	0	0.0116883	0	0.0116883	0.0012987	5
ILMN_2048326	RPS27A	0	0	0	0	0	5
ILMN_1755883	RPS27A	0.0285714	0.0103896	0.0207792	0.0285714	0.0493507	5
ILMN_1712678	RPS27L	0	0	0	0.0038961	0	5
ILMN_2415722	RPS29	0	0	0	0	0	5
ILMN_2298818	RPS29	0	0	0	0	0	5
ILMN_1694742	RPS29	0	0	0	0	0	5
ILMN_1760714	RPS3	0	0	0	0	0	5
ILMN_2139943	RPS3A	0	0	0	0	0	5
ILMN_2166831	RPS4X	0	0	0	0	0	5
ILMN_1810577	RPS4X	0	0	0	0	0	5
ILMN_2191331	RPS4Y2	0	0	0.0012987	0	0.00649351	5
ILMN_1707810	RPS5	0	0	0	0	0	5
ILMN_1806294	RPS6KA3	0	0.00519481	0	0.0012987	0	5
ILMN_1761175	RPS6KB2	0.0012987	0.0194805	0.0012987	0.0025974	0.025974	5
ILMN_2038772	RPS9	0	0	0.0038961	0.0038961	0.0012987	5
ILMN_1791097	RSBN1	0	0	0	0	0	5
ILMN_1763694	RSPRY1	0	0	0	0	0	5
ILMN_1808305	RTCD1	0	0.00519481	0	0	0.0103896	5
ILMN_1803162	RTEL1	0	0	0	0	0	5
ILMN_2281786	RTN1	0	0	0	0	0	5
ILMN_1656540	RUVBL1	0	0	0	0	0	5
ILMN_1693108	RUVBL1	0	0	0	0	0	5
ILMN_2120340	RUVBL2	0	0	0	0	0	5
ILMN_1698233	RWDD2B	0.0012987	0.0194805	0	0	0.0285714	5
ILMN_2363439	RYK	0	0	0	0	0	5
ILMN_2407168	S100A13	0	0	0	0	0	5
ILMN_2294274	S100PBP	0	0	0	0	0	5
ILMN_1740842	SALL2	0	0	0	0	0	5
ILMN_1767801	SAMD10	0	0	0	0.0116883	0	5
ILMN_1738657	SATB2	0	0	0	0	0	5
ILMN_2402499	SC4MOL	0	0	0	0	0	5
ILMN_1654893	SCAMP2	0	0	0.0038961	0.0038961	0.0103896	5
ILMN_1800543	SCFD1	0	0	0	0	0	5
ILMN_1746598	SCNM1	0	0	0	0	0.0038961	5
ILMN_1701621	SCO2	0	0	0	0	0	5
ILMN_1667257	SDHB	0	0	0	0	0	5
ILMN_1746241	SDHC	0	0	0	0	0	5
ILMN_3223181	SEC13	0	0	0	0.0012987	0.0038961	5
ILMN_1659564	SEC61A1	0.0220779	0	0.0311688	0	0.00909091	5
ILMN_1708619	SEH1L	0	0	0	0	0	5
ILMN_2134110	SELK	0	0	0.0233766	0	0	5
ILMN_1787680	SELS	0	0	0	0	0	5
ILMN_1765641	SEMA3A	0.0181818	0.0142857	0.00519481	0.00909091	0	5
ILMN_1712914	SEMA6B	0	0	0	0	0	5
ILMN_2399264	2011-09-06	0.0012987	0	0.0025974	0	0	5
ILMN_1729019	2011-09-07	0	0	0	0.0116883	0	5
ILMN_1789136	SERF2	0	0	0	0	0	5
ILMN_1651347	SERTAD2	0	0	0	0	0	5
ILMN_1724495	SESTD1	0.0012987	0	0.0025974	0	0.0415584	5
ILMN_1714327	SETD1A	0	0	0	0	0	5
ILMN_1654637	SETD5	0.00909091	0	0.0103896	0.0012987	0.00649351	5
ILMN_1706075	SF3B1	0	0	0	0	0	5
ILMN_1703720	SF3B14	0	0	0	0	0	5
ILMN_1811560	SF4	0	0	0	0	0	5
ILMN_1795341	SFRS1	0	0	0	0	0	5
ILMN_1742798	SFRS10	0	0	0	0	0	5
ILMN_1677162	SFRS13A	0	0	0	0	0	5
ILMN_3224934	SFRS18	0	0	0	0	0	5
ILMN_3299558	SFRS18	0	0	0	0	0	5
ILMN_1696407	SFRS2	0	0	0	0	0	5
ILMN_1772702	SFRS2B	0	0	0	0	0	5
ILMN_1761996	SFRS5	0	0	0	0	0	5
ILMN_2378868	SFRS5	0	0	0	0	0	5
ILMN_1760683	SFRS9	0	0	0	0	0	5
ILMN_1689114	SFTPA2B	0	0	0	0	0	5
ILMN_1674620	SGCE	0	0	0	0	0	5
ILMN_1702487	SGK	0	0	0	0	0	5
ILMN_1779171	SGSM2	0	0	0	0	0	5
ILMN_1672795	SH2D5	0	0	0	0.0025974	0	5
ILMN_1743103	SH3PXD2A	0	0	0	0	0	5
ILMN_2128128	SHFM1	0	0	0	0	0	5
ILMN_1695949	SIGLEC12	0	0	0	0	0	5
ILMN_3229733	SIGMAR1	0	0	0	0	0	5
ILMN_1765872	SIPA1L3	0.0363636	0	0	0	0	5
ILMN_1710598	SKI	0	0	0	0	0	5
ILMN_1666512	SKIV2L	0	0	0	0	0	5
ILMN_2201668	SLC19A2	0	0	0	0	0	5
ILMN_1653200	SLC22A17	0	0.0025974	0.0025974	0.0012987	0.00519481	5
ILMN_3227263	SLC22A23	0.0012987	0.0012987	0	0.0194805	0	5
ILMN_1679949	SLC25A23	0	0.0025974	0	0.0103896	0	5
ILMN_1782890	SLC25A3	0	0	0	0	0	5
ILMN_2332713	SLC25A3	0	0	0.0012987	0	0.0012987	5
ILMN_2211780	SLC25A4	0	0	0	0	0	5
ILMN_1681670	SLC25A4	0.0012987	0	0.0454546	0.0012987	0	5
ILMN_1774062	SLC25A5	0	0	0	0	0	5
ILMN_1798885	SLC35A2	0.0012987	0	0.0038961	0.0285714	0.00649351	5
ILMN_1754235	SLC35C2	0	0	0	0	0	5
ILMN_1700695	SLC44A1	0	0	0	0	0	5
ILMN_1750876	SLC4A1AP	0	0	0	0	0.00909091	5
ILMN_2412849	SLC5A10	0	0.00519481	0	0.00909091	0.00909091	5
ILMN_1783120	SLMAP	0	0	0	0	0	5
ILMN_2081682	SMAP2	0	0	0	0	0	5
ILMN_1791702	SMARCA2	0	0	0	0	0	5
ILMN_1814173	SMARCA4	0	0	0	0	0	5
ILMN_2403458	SMARCB1	0.0012987	0	0	0.0012987	0	5
ILMN_1718807	SMC3	0	0	0	0	0	5
ILMN_2225318	SMS	0	0	0	0	0	5
ILMN_1694305	SMS	0	0	0	0	0	5
ILMN_1764803	SMU1	0.0025974	0.00519481	0	0.0038961	0	5
ILMN_1791884	SNHG11	0.00909091	0.0194805	0.0467533	0.00909091	0.0103896	5
ILMN_3248890	SNORA24	0	0	0.0142857	0	0.0155844	5
ILMN_1787326	SNORA65	0	0	0	0	0	5
ILMN_1669210	SNORD16	0	0	0	0	0	5
ILMN_1774661	SNRPB	0	0	0	0	0	5
ILMN_1688413	SNW1	0	0	0	0	0	5
ILMN_1683950	SNX11	0	0.00779221	0.00519481	0.0025974	0.0428571	5
ILMN_1691575	SNX2	0	0	0	0	0	5
ILMN_2080760	SNX22	0	0	0	0	0	5
ILMN_2224444	SNX25	0	0	0	0	0	5
ILMN_1714401	SNX27	0	0	0	0	0	5
ILMN_1662438	SOD1	0	0.00909091	0	0.0025974	0.0207792	5
ILMN_2336781	SOD2	0	0	0	0	0	5
ILMN_1663090	SON	0	0	0	0	0	5
ILMN_1703427	SON	0	0	0	0	0	5
ILMN_1653055	SOX3	0	0	0	0	0	5
ILMN_1815745	SOX4	0	0	0	0.0025974	0.0116883	5
ILMN_1778599	SP140	0.0493507	0.0454546	0	0	0	5
ILMN_1795251	SPARCL1	0.0012987	0	0.00519481	0	0	5
ILMN_2203463	SPATS2	0	0.0207792	0.0025974	0.0363636	0.00519481	5
ILMN_1683678	SPATS2L	0	0	0	0	0	5
ILMN_1665280	SPCS1	0	0	0	0	0	5
ILMN_1809488	SPCS2	0	0	0	0	0	5
ILMN_1802611	SPEN	0	0.0025974	0	0	0	5
ILMN_1696463	SPI1	0	0	0	0	0	5
ILMN_1804277	SPRED1	0	0	0	0	0	5
ILMN_1716591	SPRR1A	0	0	0	0	0.00909091	5
ILMN_1807609	SPTBN5	0	0.025974	0	0.0025974	0.00649351	5
ILMN_1663035	SREBF1	0.0012987	0.0012987	0	0	0	5
ILMN_2328986	SREBF1	0	0	0	0	0	5
ILMN_2234758	SRP14	0	0	0	0	0	5
ILMN_2312275	SRP54	0	0	0	0	0	5
ILMN_1695468	SRPK2	0	0	0	0	0.00649351	5
ILMN_1711608	SSBP2	0	0	0	0	0	5
ILMN_2361163	SSBP3	0	0	0	0	0	5
ILMN_1670185	SSH3	0	0	0.0285714	0.0025974	0.0103896	5
ILMN_1785037	SSR2	0.0181818	0.0012987	0	0	0	5
ILMN_1783226	SSR2	0	0	0	0	0	5
ILMN_2151048	STAG1	0	0	0	0	0	5
ILMN_1782609	STAG2	0	0	0	0	0	5
ILMN_1789510	STIP1	0	0.00519481	0.00649351	0.0246753	0.025974	5
ILMN_1791328	STK39	0	0	0	0	0	5
ILMN_1745593	STMN1	0	0	0	0	0	5
ILMN_1808783	STRBP	0	0	0	0	0	5
ILMN_1749882	STRN	0	0	0	0	0	5
ILMN_1746090	STT3A	0	0	0	0	0	5
ILMN_2157421	STUB1	0	0	0	0	0	5
ILMN_1803698	STX16	0	0	0	0	0	5
ILMN_1808860	STX5	0	0	0	0	0	5
ILMN_1707804	SULT1A3	0	0.00519481	0	0.0285714	0.00519481	5
ILMN_1738150	SUMO2	0	0	0	0	0	5
ILMN_2333594	SUMO2	0	0	0	0	0	5
ILMN_1710682	SUOX	0.0493507	0.0012987	0	0	0	5
ILMN_1703866	SUPT5H	0	0	0	0	0	5
ILMN_1806306	SV2B	0.0246753	0.0402597	0.00779221	0.0116883	0.0285714	5
ILMN_2394498	SYF2	0	0	0	0	0	5
ILMN_1810875	SYNGR1	0	0	0	0.0116883	0.0428571	5
ILMN_1691458	SYPL1	0	0	0.0025974	0.00909091	0.0025974	5
ILMN_1717934	SYT11	0	0	0	0	0	5
ILMN_1792176	TADA3	0	0	0	0	0	5
ILMN_1721093	TAF10	0	0	0	0	0	5
ILMN_1653367	TAF12	0	0	0	0	0	5
ILMN_1678707	TAF15	0	0	0	0	0	5
ILMN_2402131	TAF15	0	0	0	0	0	5
ILMN_1737535	TAF4	0	0	0	0	0	5
ILMN_1715069	TANK	0	0	0	0	0	5
ILMN_1692844	TBC1D19	0	0	0	0	0	5
ILMN_3223246	TBC1D3F	0	0	0	0	0	5
ILMN_1661622	TBC1D7	0	0	0	0	0	5
ILMN_1726239	TBCA	0	0.0038961	0	0	0.0142857	5
ILMN_1692714	TBX21	0.0207792	0	0.0012987	0.0142857	0.0012987	5
ILMN_2357770	TCEA1	0	0	0	0	0	5
ILMN_1726928	TCEA3	0	0	0	0	0	5
ILMN_1733927	TCEB2	0	0.0207792	0	0	0.0324675	5
ILMN_1808110	TCEB3	0.0012987	0.0012987	0.00909091	0.0025974	0	5
ILMN_2398039	TCERG1	0	0	0	0	0	5
ILMN_2314007	TCF12	0	0	0	0	0	5
ILMN_1669832	TCF12	0	0	0	0.0012987	0	5
ILMN_1814194	TCF4	0	0	0	0	0	5
ILMN_1776347	TCP1	0	0	0	0	0.0038961	5
ILMN_1700955	TCTEX1D2	0	0	0	0	0	5
ILMN_1777096	TDG	0	0	0	0	0	5
ILMN_1720799	TECR	0	0	0	0	0	5
ILMN_1653529	TEX10	0	0	0	0	0	5
ILMN_1781623	TEX264	0	0	0	0	0	5
ILMN_1812474	TFG	0	0	0	0	0	5
ILMN_2318638	TGIF1	0	0	0	0	0.00909091	5
ILMN_1656761	TGIF1	0	0	0	0	0	5
ILMN_1780699	THAP11	0	0	0	0	0	5
ILMN_1696883	THOC2	0	0.0012987	0	0	0.0181818	5
ILMN_2415926	THOC3	0	0	0	0	0	5
ILMN_1679880	THOC6	0	0	0.0038961	0.0168831	0	5
ILMN_1661683	THRA	0	0	0	0	0	5
ILMN_1718182	THRA	0	0	0	0	0	5
ILMN_1673746	TIMM23	0	0	0	0	0	5
ILMN_1749078	TIMP2	0	0	0	0	0	5
ILMN_1765578	TIPARP	0	0.00519481	0	0.0116883	0.0103896	5
ILMN_1784655	TLCD1	0	0	0	0	0	5
ILMN_2103761	TLE4	0	0	0	0	0	5
ILMN_1663486	TLK2	0.00909091	0.0285714	0.0142857	0.0337662	0.0324675	5
ILMN_1697472	TM2D3	0	0	0	0	0.0038961	5
ILMN_1750961	TM6SF1	0	0.00519481	0	0	0.0103896	5
ILMN_1803995	TM7SF3	0	0	0	0	0	5
ILMN_1709334	TM9SF1	0	0	0	0	0	5
ILMN_1737164	TM9SF1	0	0	0	0	0	5
ILMN_2333440	TM9SF1	0	0	0	0.0038961	0	5
ILMN_1804148	TMED4	0	0	0	0	0	5
ILMN_3240187	TMEM111	0	0	0	0	0	5
ILMN_2317923	TMEM132A	0	0	0	0	0	5
ILMN_2340721	TMEM134	0	0	0	0	0	5
ILMN_1803624	TMEM147	0	0	0	0	0.0142857	5
ILMN_2299612	TMEM150A	0	0	0	0	0	5
ILMN_2208373	TMEM164	0	0	0.00519481	0.0038961	0.0025974	5
ILMN_2210386	TMEM17	0	0	0	0	0	5
ILMN_3239055	TMEM208	0	0	0.00779221	0.0246753	0	5
ILMN_1685602	TMEM41A	0	0	0.0025974	0.0116883	0.00649351	5
ILMN_1749930	TMEM48	0	0	0.0038961	0	0	5
ILMN_1692754	TMEM49	0.0012987	0.0272727	0.00519481	0.0103896	0	5
ILMN_1689704	TMEM5	0	0	0	0	0	5
ILMN_1718831	TMEM57	0	0	0	0	0	5
ILMN_1752213	TMEM60	0	0	0	0	0	5
ILMN_2373010	TMEM70	0	0	0.0038961	0	0.0363636	5
ILMN_1798874	TMEM85	0	0	0	0	0	5
ILMN_1812392	TMSB10	0	0	0	0	0	5
ILMN_2222688	TMSB4X	0	0	0	0	0	5
ILMN_1683271	TMSB4X	0	0	0	0	0	5
ILMN_2066858	TNFSF13B	0.0012987	0.0025974	0	0.0324675	0.0038961	5
ILMN_1690826	TNKS1BP1	0	0	0	0.0168831	0	5
ILMN_1786347	TNPO1	0	0	0.0194805	0	0.0038961	5
ILMN_1656066	TNPO2	0	0	0	0	0	5
ILMN_1683811	TNPO3	0	0	0	0	0	5
ILMN_1672004	TOB1	0	0	0	0	0	5
ILMN_1746426	TOMM70A	0	0	0	0	0	5
ILMN_2192316	TOP1	0	0	0	0	0.0012987	5
ILMN_1664440	TP53BP1	0	0	0	0	0	5
ILMN_2323633	TPD52L2	0	0	0	0.0025974	0	5
ILMN_1707627	TPI1	0	0.00519481	0.0142857	0	0	5
ILMN_2353754	TPM3	0.0181818	0.00519481	0	0.0285714	0.00909091	5
ILMN_2094718	TPT1	0	0	0	0	0	5
ILMN_1789614	TPT1	0	0	0	0	0	5
ILMN_1699737	TRAP1	0.0012987	0	0.0454546	0.0181818	0	5
ILMN_1751627	TRAPPC3	0	0	0	0	0	5
ILMN_2369104	TRAPPC6B	0	0	0	0	0	5
ILMN_1655482	TRIM27	0	0	0	0	0	5
ILMN_1810441	TRIM3	0	0	0	0	0	5
ILMN_1736562	TRIM39	0	0	0	0	0	5
ILMN_1729495	TRIM41	0	0	0	0	0	5
ILMN_1796063	TRIM44	0	0	0	0	0	5
ILMN_1770865	TRIM46	0	0	0	0	0	5
ILMN_3235584	TRIM66	0	0	0	0	0	5
ILMN_1719254	TRIM9	0	0	0	0	0.00909091	5
ILMN_1661173	TRIP4	0	0	0	0	0	5
ILMN_1690802	TRMT112	0	0.0194805	0	0.012987	0.0428571	5
ILMN_1787567	TSC22D1	0	0	0	0	0	5
ILMN_1692177	TSC22D1	0	0	0	0	0	5
ILMN_1718907	TSHZ1	0	0	0	0	0	5
ILMN_1655469	TSPAN3	0	0	0	0	0	5
ILMN_2319234	TTC23	0	0	0.0025974	0.0012987	0.00779221	5
ILMN_2083593	TTC32	0	0	0	0	0	5
ILMN_1746720	TTC39C	0	0.0285714	0	0.00909091	0.0324675	5
ILMN_1718971	TTC7B	0	0.00519481	0	0.0025974	0.00779221	5
ILMN_1680899	TTLL3	0	0	0	0	0	5
ILMN_1742981	TUBA1A	0	0	0	0	0	5
ILMN_2148819	TUBA1A	0	0	0	0	0	5
ILMN_1742167	TUBA1C	0	0	0	0	0	5
ILMN_2215640	TUBA3D	0	0	0	0	0	5
ILMN_1652464	TUBA3E	0	0	0	0	0	5
ILMN_1665583	TUBB	0	0	0	0	0	5
ILMN_1680874	TUBB2B	0	0	0	0	0	5
ILMN_1750100	TUBB4Q	0	0.0207792	0.0233766	0.00909091	0.0025974	5
ILMN_1728024	TUBG1	0	0	0	0	0	5
ILMN_2354547	TUSC3	0	0	0	0	0	5
ILMN_2191568	TUSC4	0	0	0.0025974	0	0.0038961	5
ILMN_1788108	TXNDC5	0.00909091	0.0272727	0	0	0.0038961	5
ILMN_1768930	U2AF2	0	0	0	0	0	5
ILMN_3297945	UBA1	0	0	0	0.0142857	0	5
ILMN_2324157	UBA3	0	0	0	0	0	5
ILMN_1782977	UBA52	0	0	0	0	0	5
ILMN_1814789	UBAP2L	0	0	0	0	0	5
ILMN_2191428	UBB	0	0	0	0	0	5
ILMN_2038773	UBC	0	0	0	0	0	5
ILMN_2331501	UBC	0	0	0	0	0	5
ILMN_2320853	UBE2D3	0	0	0	0	0	5
ILMN_2390338	UBE2E3	0	0	0	0	0	5
ILMN_1701331	UBE2M	0	0	0	0	0	5
ILMN_1772925	UBE2NL	0	0	0	0	0	5
ILMN_1700811	UBFD1	0	0	0	0	0	5
ILMN_2340065	UBL5	0	0	0	0	0	5
ILMN_2399503	UBN1	0	0	0	0	0	5
ILMN_1663489	UBR2	0	0	0	0	0	5
ILMN_3242176	UBR3	0	0	0	0	0	5
ILMN_1699226	UBR4	0	0	0	0	0	5
ILMN_1741253	UBR5	0	0	0	0	0	5
ILMN_1812769	UBXN1	0	0	0	0	0	5
ILMN_1679495	ULK3	0.0038961	0.0207792	0	0.00649351	0.0142857	5
ILMN_2383693	UPF2	0	0	0	0	0	5
ILMN_1717852	USH1G	0.0181818	0	0	0	0	5
ILMN_2397230	USP16	0	0	0	0	0	5
ILMN_2397231	USP16	0.0012987	0.0025974	0	0	0.0025974	5
ILMN_1718679	USP19	0	0	0	0	0	5
ILMN_1755502	USP2	0	0	0	0	0	5
ILMN_2349006	USP21	0	0	0	0	0	5
ILMN_1780887	USP21	0	0	0	0	0	5
ILMN_1801931	USP41	0.0012987	0.0207792	0.0025974	0.0038961	0	5
ILMN_1671314	UXT	0	0	0	0	0	5
ILMN_1804676	VAMP4	0	0	0.0441558	0	0.00649351	5
ILMN_1696601	VARS	0	0	0	0	0	5
ILMN_2175601	VDAC1	0.0012987	0.0012987	0	0	0	5
ILMN_1705310	VEZF1	0	0.0038961	0	0.0025974	0	5
ILMN_1782538	VIM	0	0	0	0	0	5
ILMN_2122926	VN1R2	0.012987	0.0025974	0	0	0	5
ILMN_1736751	VPS26B	0	0	0	0	0	5
ILMN_1704619	VPS29	0	0	0	0	0	5
ILMN_1692865	VPS37D	0	0	0	0	0	5
ILMN_1806510	VPS53	0	0	0	0	0	5
ILMN_2340935	WBP5	0.0012987	0.0194805	0	0.0025974	0.0142857	5
ILMN_2045729	WDR12	0	0	0	0	0	5
ILMN_1735402	WDR22	0	0	0	0	0	5
ILMN_1670172	WDR33	0	0	0	0	0	5
ILMN_3244963	WDR42A	0	0	0	0	0	5
ILMN_1799814	WDR57	0	0	0	0	0	5
ILMN_2131392	WDR70	0	0	0	0	0	5
ILMN_1747759	WSB1	0	0	0	0.00909091	0	5
ILMN_1748904	WTAP	0	0	0	0	0	5
ILMN_1734544	WTAP	0	0	0	0	0	5
ILMN_1764034	XCR1	0.0207792	0.00649351	0	0	0	5
ILMN_1764573	XIST	0	0	0	0	0	5
ILMN_2054928	XPNPEP3	0	0	0	0	0	5
ILMN_2124769	YBX1	0	0	0	0	0	5
ILMN_1712975	YIF1A	0	0	0	0	0	5
ILMN_1773687	YIF1B	0	0.0038961	0.0012987	0.0012987	0.0116883	5
ILMN_1730658	YTHDF2	0.0012987	0.00519481	0.00519481	0.00909091	0.0025974	5
ILMN_1694385	YWHAB	0	0	0	0	0	5
ILMN_1728512	YWHAH	0	0	0	0	0	5
ILMN_2181540	YY1	0	0	0	0	0	5
ILMN_1674838	ZAP70	0.0012987	0.0207792	0.0246753	0.00779221	0.0428571	5
ILMN_1711048	ZBTB17	0	0.0012987	0.00519481	0.0038961	0.0103896	5
ILMN_1689456	ZBTB20	0	0	0	0	0	5
ILMN_3241524	ZBTB22	0.0012987	0.0038961	0	0	0	5
ILMN_1656118	ZBTB7A	0	0.00519481	0	0.0025974	0	5
ILMN_1686414	ZC3H14	0	0	0	0	0	5
ILMN_1655137	ZCCHC11	0	0	0	0	0	5
ILMN_1762231	ZEB1	0	0	0	0.0285714	0.0103896	5
ILMN_1795228	ZFAND5	0	0	0	0	0	5
ILMN_1803590	ZFC3H1	0	0	0	0	0	5
ILMN_1808587	ZFHX3	0	0	0	0	0	5
ILMN_2150258	ZFP36L2	0	0	0	0	0	5
ILMN_2340439	ZFP64	0	0	0.00649351	0.0324675	0	5
[truncated: 45,232 more rows]

## Sheet: Clonetech
PROBE_ID	SYMBOL	Clontech1.Detection Pval	Clontech2.Detection Pval	Clontech3.Detection Pval
ILMN_3241953	A2LD1	0.0025974	0.0038961	0.00519481	3
ILMN_1745607	A2M	0	0	0	3
ILMN_1698554	AACS	0.00779221	0.0025974	0.0038961	3
ILMN_2061446	AADACL1	0	0	0	3
ILMN_1676336	AADACL1	0	0	0	3
ILMN_1726986	AADAT	0.0025974	0.0012987	0	3
ILMN_3237396	AAGAB	0.0012987	0	0	3
ILMN_1880387	AAK1	0.0025974	0.0038961	0.0155844	3
ILMN_1653165	AAMP	0.0012987	0	0	3
ILMN_1662364	AARS	0	0	0	3
ILMN_1674698	AARS2	0.0025974	0	0	3
ILMN_1700461	AARSD1	0	0	0	3
ILMN_1784269	AASDH	0.0012987	0.0012987	0.00519481	3
ILMN_1698189	AASDHPPT	0	0	0	3
ILMN_2096191	AASDHPPT	0	0	0	3
ILMN_1678323	AASS	0.0220779	0.0311688	0.00519481	3
ILMN_1703743	AATF	0.0012987	0	0	3
ILMN_1687609	AATK	0.0012987	0	0	3
ILMN_1699334	AATK	0.0038961	0.0038961	0.0025974	3
ILMN_1805104	ABAT	0	0	0	3
ILMN_2404407	ABAT	0	0	0	3
ILMN_1766054	ABCA1	0	0	0	3
ILMN_1747627	ABCA2	0	0	0	3
ILMN_1758523	ABCA3	0	0	0	3
ILMN_1743205	ABCA7	0.0207792	0.0103896	0.00519481	3
ILMN_1796801	ABCA8	0	0	0	3
ILMN_1720501	ABCA9	0.0012987	0.0038961	0.0012987	3
ILMN_1812070	ABCB1	0.0012987	0	0	3
ILMN_2094875	ABCB1	0.00779221	0.0181818	0.0324675	3
ILMN_1665730	ABCB10	0.0025974	0.0012987	0.0025974	3
ILMN_2193980	ABCB6	0.0012987	0	0	3
ILMN_1687840	ABCB7	0.0025974	0.0012987	0.00519481	3
ILMN_2343047	ABCB9	0.0025974	0	0	3
ILMN_2343048	ABCB9	0.0012987	0	0	3
ILMN_1776119	ABCC10	0.0350649	0.0142857	0.0376623	3
ILMN_1788457	ABCC4	0.0025974	0.0012987	0.0025974	3
ILMN_2194009	ABCC4	0.00519481	0.0038961	0.00779221	3
ILMN_1706531	ABCC5	0	0	0	3
ILMN_1651964	ABCC5	0	0.0012987	0	3
ILMN_1767129	ABCC8	0.0012987	0	0	3
ILMN_1746196	ABCC9	0.0337662	0.0103896	0.0038961	3
ILMN_1674032	ABCD3	0.0012987	0	0.0025974	3
ILMN_2330267	ABCE1	0	0	0	3
ILMN_1676846	ABCE1	0.0012987	0.0012987	0.00519481	3
ILMN_2392635	ABCF1	0.0012987	0	0	3
ILMN_1763875	ABCF1	0	0	0	3
ILMN_1781999	ABCF2	0.0025974	0.0012987	0.0012987	3
ILMN_1669201	ABCF2	0.0025974	0.0012987	0.0025974	3
ILMN_1810085	ABCF3	0.0246753	0.0012987	0.0025974	3
ILMN_1658176	ABCG1	0.00779221	0.0454546	0.0246753	3
ILMN_2329927	ABCG1	0.0025974	0.0012987	0.0012987	3
ILMN_1794782	ABCG1	0	0	0	3
ILMN_1789641	ABCG2	0.0012987	0.00779221	0.00779221	3
ILMN_1779470	ABCG4	0.0012987	0	0	3
ILMN_1743371	ABHD1	0.00779221	0.00649351	0.00519481	3
ILMN_1770031	ABHD10	0	0	0	3
ILMN_1745116	ABHD12	0	0	0	3
ILMN_2318685	ABHD12	0.0012987	0	0	3
ILMN_2245305	ABHD12	0	0	0	3
ILMN_1794213	ABHD14A	0	0	0	3
ILMN_1723662	ABHD2	0.0025974	0.0012987	0.0025974	3
ILMN_1801767	ABHD3	0.0012987	0.0012987	0.0155844	3
ILMN_1700633	ABHD4	0.00909091	0.0038961	0.00519481	3
ILMN_1706344	ABHD6	0	0	0	3
ILMN_1719498	ABHD7	0.0025974	0.0012987	0.0025974	3
ILMN_1712707	ABHD8	0	0	0	3
ILMN_2329958	ABI1	0	0	0	3
ILMN_1724497	ABI2	0.0012987	0	0	3
ILMN_1755658	ABI3	0.0025974	0.00649351	0.00519481	3
ILMN_1673639	ABI3BP	0.0025974	0.0103896	0.0103896	3
ILMN_1713732	ABL1	0	0	0	3
ILMN_1785424	ABLIM1	0	0	0	3
ILMN_2396672	ABLIM1	0	0	0	3
ILMN_1758825	ABLIM2	0	0	0	3
ILMN_1656940	ABLIM3	0.0025974	0.0012987	0	3
ILMN_1672878	ABR	0	0	0	3
ILMN_1802096	ABTB1	0	0	0	3
ILMN_1753370	ABTB2	0.0012987	0	0	3
ILMN_1738921	ACAA1	0	0	0	3
ILMN_1660199	ACAA2	0	0	0	3
ILMN_2331636	ACACA	0	0	0	3
ILMN_1772123	ACACA	0	0	0	3
ILMN_1763852	ACACB	0	0	0	3
ILMN_1687303	ACAD10	0.00779221	0.0012987	0.0025974	3
ILMN_1761058	ACAD11	0	0	0	3
ILMN_2225595	ACAD8	0.0012987	0	0	3
ILMN_1775579	ACAD9	0	0	0	3
ILMN_1778104	ACADM	0	0	0	3
ILMN_2053679	ACADM	0	0	0	3
ILMN_1795104	ACADS	0.00779221	0.0025974	0.0025974	3
ILMN_1806408	ACADVL	0	0	0	3
ILMN_2352009	ACADVL	0	0	0	3
ILMN_3236270	ACAP2	0.0025974	0.0012987	0.0038961	3
ILMN_1800008	ACAT1	0	0	0	3
ILMN_1708672	ACAT2	0	0	0	3
ILMN_1665945	ACBD3	0	0	0	3
ILMN_1684271	ACBD6	0.0025974	0.0012987	0	3
ILMN_1726388	ACBD7	0	0	0	3
ILMN_1779685	ACCN1	0.0012987	0	0	3
ILMN_1769694	ACCN2	0	0	0	3
ILMN_1734479	ACCN3	0.0350649	0.0220779	0.00519481	3
ILMN_3187680	ACCS	0.0012987	0.0012987	0.0038961	3
ILMN_1716480	ACD	0.0025974	0	0.0012987	3
ILMN_3237774	ACER3	0	0	0	3
ILMN_2333219	ACHE	0.0012987	0	0	3
ILMN_1735471	ACHE	0.0025974	0	0	3
ILMN_1699636	ACIN1	0.0012987	0	0	3
ILMN_2371379	ACLY	0	0	0	3
ILMN_1749014	ACLY	0	0	0	3
ILMN_1771348	ACN9	0.0025974	0.0012987	0.0025974	3
ILMN_2134039	ACN9	0	0	0	3
ILMN_1750800	ACO1	0	0	0	3
ILMN_1654861	ACO2	0	0	0	3
ILMN_1715543	ACOT1	0.0025974	0.00519481	0.0038961	3
ILMN_1739594	ACOT11	0.0025974	0.0038961	0.00519481	3
ILMN_1716237	ACOT2	0.0025974	0.0116883	0.00649351	3
ILMN_1764321	ACOT4	0.0012987	0	0	3
ILMN_1740265	ACOT7	0	0	0	3
ILMN_2332250	ACOT7	0	0	0	3
ILMN_1679600	ACOT8	0.00779221	0	0	3
ILMN_2367070	ACOT9	0.0025974	0.0012987	0.00519481	3
ILMN_1658995	ACOT9	0.0025974	0.0038961	0.0038961	3
ILMN_1750158	ACOX1	0.0012987	0.0012987	0.0025974	3
ILMN_1685703	ACOX2	0.0025974	0.0012987	0	3
ILMN_1743396	ACOX3	0.0025974	0	0.0012987	3
ILMN_1669633	ACP1	0	0	0	3
ILMN_2344956	ACP1	0	0	0	3
ILMN_2104830	ACP2	0.0012987	0	0	3
ILMN_2234343	ACP6	0.0168831	0.00779221	0.0311688	3
ILMN_1706598	ACPL2	0.0025974	0.0012987	0.0025974	3
ILMN_2306955	ACPL2	0.0025974	0.0025974	0.00519481	3
ILMN_2227011	ACSBG1	0	0	0	3
ILMN_3236756	ACSF2	0.00779221	0.0012987	0.0012987	3
ILMN_1684585	ACSL1	0	0	0	3
ILMN_2360705	ACSL3	0	0	0	3
ILMN_1654414	ACSL3	0.00779221	0.0207792	0.00779221	3
ILMN_1666096	ACSL3	0.0012987	0	0	3
ILMN_2391458	ACSL4	0.0025974	0.0038961	0.00519481	3
ILMN_1683598	ACSL4	0	0	0	3
ILMN_1705247	ACSL5	0.0012987	0	0	3
ILMN_1737418	ACSL6	0.0025974	0.0038961	0.0207792	3
ILMN_1766966	ACSM5	0.00779221	0.0012987	0.0025974	3
ILMN_1752269	ACSS1	0	0	0	3
ILMN_2336595	ACSS2	0	0	0	3
ILMN_1714197	ACSS2	0	0	0	3
ILMN_2125869	ACTA1	0.00779221	0.0012987	0.0025974	3
ILMN_1671703	ACTA2	0	0	0	3
ILMN_2152131	ACTB	0	0	0	3
ILMN_1777296	ACTB	0	0	0	3
ILMN_2038777	ACTB	0	0	0	3
ILMN_1658660	ACTC1	0.00909091	0.0103896	0.00519481	3
ILMN_2053178	ACTG1	0	0	0	3
ILMN_1704961	ACTG1	0	0	0	3
ILMN_1795325	ACTG2	0	0	0	3
ILMN_1749297	ACTL6A	0	0	0	3
ILMN_2328280	ACTL6A	0.0012987	0.0012987	0	3
ILMN_1657855	ACTL6B	0.0038961	0	0	3
ILMN_2232177	ACTN1	0.0025974	0	0	3
ILMN_1654422	ACTN2	0.0025974	0.0181818	0.00519481	3
ILMN_1725534	ACTN4	0.0012987	0	0	3
ILMN_1798254	ACTR10	0	0	0	3
ILMN_1792314	ACTR1A	0	0	0	3
ILMN_1695821	ACTR1B	0.0012987	0	0	3
ILMN_2388605	ACTR2	0	0	0	3
ILMN_1657153	ACTR3	0	0	0	3
ILMN_2260392	ACTR3B	0.0233766	0.0142857	0.0298701	3
ILMN_1697585	ACTR6	0	0	0	3
ILMN_1689162	ACTR8	0.0025974	0.0012987	0	3
ILMN_1815392	ACTRT1	0.0025974	0.0012987	0.0155844	3
ILMN_1760490	ACVR1	0	0	0	3
ILMN_2243308	ACVR1B	0	0	0	3
ILMN_2152711	ACVR2A	0.00779221	0.00779221	0.00649351	3
ILMN_3250257	ACVRL1	0.0012987	0	0	3
ILMN_1683883	ACY1	0.0038961	0	0.0012987	3
ILMN_1670193	ACY3	0.0402597	0.0012987	0.0025974	3
ILMN_2319825	ACYP1	0.0012987	0	0	3
ILMN_1694233	ACYP1	0	0	0	3
ILMN_1697550	ACYP2	0.00519481	0.0194805	0.0025974	3
ILMN_2158705	ACYP2	0	0	0	3
ILMN_1803686	ADA	0.0025974	0	0	3
ILMN_1725043	ADAL	0.0025974	0.0012987	0.0025974	3
ILMN_1718946	ADAM10	0.0012987	0.0038961	0.0038961	3
ILMN_2384544	ADAM15	0.00519481	0	0	3
ILMN_1756920	ADAM15	0	0	0	3
ILMN_1799728	ADAM15	0.0025974	0.0012987	0.0012987	3
ILMN_1751500	ADAM15	0.00909091	0.00519481	0.0233766	3
ILMN_2121068	ADAM17	0	0	0	3
ILMN_1713751	ADAM19	0.0012987	0	0	3
ILMN_2060086	ADAM23	0.0025974	0.0012987	0.00519481	3
ILMN_1673566	ADAMTS1	0	0	0	3
ILMN_1672403	ADAMTS8	0.0025974	0.0012987	0.00519481	3
ILMN_1721495	ADAMTSL2	0	0	0	3
ILMN_1798690	ADAMTSL3	0.0038961	0.00649351	0.0025974	3
ILMN_3247424	ADAP1	0.0012987	0	0	3
ILMN_1763000	ADAP2	0	0	0	3
ILMN_1776777	ADAR	0	0	0	3
ILMN_2320964	ADAR	0	0	0	3
ILMN_2319326	ADARB1	0.0012987	0	0	3
ILMN_1679797	ADARB1	0	0	0	3
ILMN_1749493	ADARB2	0.0012987	0	0	3
ILMN_1657139	ADAT1	0.0012987	0	0	3
ILMN_1659599	ADC	0.0012987	0	0	3
ILMN_1698777	ADCK1	0.0025974	0	0	3
ILMN_1663132	ADCK2	0	0	0	3
ILMN_1700349	ADCK4	0.0025974	0.0012987	0.0012987	3
ILMN_2120555	ADCY1	0	0	0	3
ILMN_1742073	ADCY1	0.0038961	0.0116883	0.0025974	3
ILMN_1676893	ADCY3	0	0	0	3
ILMN_2148944	ADCY4	0.00519481	0.0012987	0.0025974	3
ILMN_1708588	ADCY5	0.0038961	0.00649351	0.00519481	3
ILMN_2311674	ADCY6	0.00519481	0.0116883	0.0142857	3
ILMN_1685156	ADCY6	0.0012987	0	0	3
ILMN_1655935	ADCY7	0.0038961	0.0038961	0.0116883	3
ILMN_1754440	ADCY8	0.0025974	0	0.0025974	3
ILMN_1654287	ADCY9	0.0025974	0.0038961	0.00519481	3
ILMN_1763344	ADCYAP1	0.0012987	0.0012987	0	3
ILMN_2356786	ADD1	0	0	0	3
ILMN_1759252	ADD1	0	0	0	3
ILMN_1787378	ADD3	0.0025974	0.0025974	0.00519481	3
ILMN_1814526	ADD3	0	0	0	3
ILMN_2311278	ADD3	0	0	0	3
ILMN_1738604	ADH5	0.0012987	0.0012987	0	3
ILMN_1702858	ADHFE1	0	0	0	3
ILMN_2363634	ADHFE1	0.0012987	0.0012987	0	3
ILMN_1813975	ADI1	0.0012987	0.0012987	0.0025974	3
ILMN_2096322	ADIPOR1	0	0	0	3
ILMN_1688322	ADIPOR1	0	0	0	3
ILMN_2224833	ADIPOR2	0	0	0	3
ILMN_2358626	ADK	0	0	0	3
ILMN_1708934	ADM	0	0	0	3
ILMN_1657993	ADNP	0.0012987	0	0	3
ILMN_2080751	ADNP2	0.0012987	0	0	3
ILMN_1690352	ADO	0	0	0	3
ILMN_2373444	ADORA1	0.0025974	0.0012987	0	3
ILMN_1747227	ADORA1	0	0	0	3
ILMN_1807372	ADORA2A	0.00519481	0.0025974	0.0038961	3
ILMN_1703946	ADORA2B	0.048052	0.0233766	0.0168831	3
ILMN_1733259	ADORA3	0	0	0	3
ILMN_1730710	ADORA3	0.0012987	0	0.0012987	3
ILMN_1793959	ADPGK	0.0012987	0	0	3
ILMN_1811480	ADPRHL2	0	0	0	3
ILMN_1679754	ADRA1B	0.0025974	0.0038961	0.00779221	3
ILMN_1659371	ADRA2A	0.0025974	0.0012987	0.0012987	3
ILMN_1677868	ADRA2B	0.0220779	0.0038961	0.0012987	3
ILMN_1695590	ADRB2	0.0012987	0	0	3
ILMN_3307926	ADRBK1	0	0	0	3
ILMN_2389013	ADRM1	0.0012987	0	0	3
ILMN_1760143	ADRM1	0	0	0	3
ILMN_1790757	ADSL	0	0	0	3
ILMN_2092664	ADSS	0	0	0	3
ILMN_1778796	ADSS	0	0	0.0012987	3
ILMN_1720235	ADSSL1	0.0012987	0	0	3
ILMN_1736178	AEBP1	0	0	0	3
ILMN_1803376	AEBP2	0.0012987	0	0	3
ILMN_3240321	AEN	0.0025974	0.0155844	0	3
ILMN_1712944	AES	0	0	0	3
ILMN_2333107	AES	0	0	0	3
ILMN_1701998	AFAP1	0.0012987	0	0	3
ILMN_1730995	AFAP1L2	0	0	0	3
ILMN_2404917	AFAP1L2	0.0012987	0.0012987	0.0038961	3
ILMN_2129015	AFF1	0.0012987	0.0012987	0.0038961	3
ILMN_1725889	AFF2	0	0	0	3
ILMN_1775235	AFF3	0	0	0	3
ILMN_1708502	AFF4	0	0	0	3
ILMN_1705447	AFG3L1	0.0025974	0.0025974	0.012987	3
ILMN_2066124	AFG3L2	0	0	0	3
ILMN_2095653	AFMID	0.00779221	0.0233766	0.00519481	3
ILMN_1707551	AFMID	0.0012987	0	0	3
ILMN_2402766	AFTPH	0.0012987	0	0.0012987	3
ILMN_1767722	AFTPH	0.0025974	0.0012987	0.0012987	3
ILMN_2342841	AFTPH	0.0025974	0.0012987	0.0012987	3
ILMN_1802631	AGA	0	0	0	3
ILMN_2269136	AGAP3	0	0	0	3
ILMN_3239130	AGAP6	0.0025974	0.0012987	0.0025974	3
ILMN_3242883	AGAP8	0.0012987	0	0	3
ILMN_2308689	AGBL5	0.0025974	0.0012987	0	3
ILMN_3260345	AGFG1	0.0012987	0.0012987	0	3
ILMN_1703228	AGFG2	0.0025974	0.0012987	0	3
ILMN_2064917	AGGF1	0	0	0	3
ILMN_1776153	AGGF1	0.00779221	0.00519481	0.00779221	3
ILMN_1772645	AGK	0	0	0	3
ILMN_2371825	AGL	0	0	0	3
ILMN_1664006	AGL	0.0038961	0.0142857	0.0025974	3
ILMN_1679520	AGPAT1	0	0	0	3
ILMN_1732176	AGPAT2	0.00779221	0.0103896	0.0012987	3
ILMN_1730504	AGPAT4	0	0	0	3
ILMN_1662049	AGPAT5	0.0012987	0.0012987	0.0012987	3
ILMN_1740752	AGPAT6	0.00779221	0.0311688	0.00519481	3
ILMN_1794875	AGPAT9	0.0025974	0.0012987	0.0038961	3
ILMN_1698209	AGPS	0.0012987	0.00649351	0.00519481	3
ILMN_1770454	AGRN	0.0012987	0	0	3
ILMN_1813530	AGT	0	0	0	3
ILMN_1718071	AGTPBP1	0	0	0	3
ILMN_1814327	AGTR1	0.0012987	0.0012987	0.0038961	3
ILMN_2341343	AGTR1	0.0012987	0.0012987	0.0025974	3
ILMN_2307656	AGTRAP	0.0402597	0.0012987	0.0181818	3
ILMN_2134801	AGXT2L1	0	0	0	3
ILMN_1757807	AGXT2L1	0	0	0	3
ILMN_1673529	AGXT2L2	0.0038961	0.0012987	0	3
ILMN_1809139	AHCTF1	0.0012987	0	0.0012987	3
ILMN_1657862	AHCY	0	0	0	3
ILMN_1770412	AHCYL1	0	0	0	3
ILMN_1712786	AHCYL2	0	0	0	3
ILMN_1791006	AHI1	0	0	0	3
ILMN_1714567	AHNAK	0	0	0	3
ILMN_1752159	AHNAK	0.0038961	0.00519481	0.0038961	3
ILMN_3243156	AHNAK2	0	0	0	3
ILMN_1812640	AHR	0	0	0	3
ILMN_1703617	AHSA1	0	0	0	3
ILMN_1798308	AHSA2	0	0	0	3
ILMN_1696512	AHSP	0.0155844	0.0220779	0.00779221	3
ILMN_3240117	AIDA	0	0	0	3
ILMN_1703538	AIF1	0	0	0	3
ILMN_1792473	AIF1	0	0	0	3
ILMN_3246401	AIF1L	0	0	0	3
ILMN_1770725	AIF1L	0	0	0	3
ILMN_2313821	AIFM1	0	0	0	3
ILMN_1668408	AIFM1	0.0025974	0.0012987	0	3
ILMN_1704173	AIFM3	0.0025974	0	0	3
ILMN_1797974	AIG1	0	0	0	3
ILMN_1673252	AIMP2	0	0	0	3
ILMN_2103841	AIP	0.0012987	0	0	3
ILMN_2261519	AIRE	0	0	0	3
ILMN_1723521	AJAP1	0.0012987	0.0012987	0.0025974	3
ILMN_2312764	AJAP1	0.048052	0.0025974	0.00519481	3
ILMN_1779965	AK1	0.0012987	0	0	3
ILMN_1670542	AK2	0	0	0	3
ILMN_1716053	AK2	0	0	0	3
ILMN_3236458	AK2P2	0.0025974	0.0012987	0	3
ILMN_1778173	AK3	0	0	0	3
ILMN_2338038	AK3L1	0.0012987	0.0012987	0	3
ILMN_1764090	AK3L1	0.0025974	0	0	3
ILMN_2387712	AK5	0	0	0	3
ILMN_1712530	AKAP1	0.0025974	0.0038961	0.0103896	3
ILMN_1718808	AKAP10	0.0025974	0.0038961	0.00519481	3
ILMN_2293758	AKAP11	0	0	0	3
ILMN_1693220	AKAP11	0	0	0	3
ILMN_1684836	AKAP12	0.0012987	0	0	3
ILMN_2308950	AKAP12	0.0012987	0.0012987	0.0038961	3
ILMN_2396956	AKAP13	0	0	0	3
ILMN_1770758	AKAP6	0.0012987	0.0012987	0.0025974	3
ILMN_1733690	AKAP7	0	0	0	3
ILMN_1741572	AKAP8	0.0025974	0.0012987	0	3
ILMN_1768962	AKAP8L	0.0038961	0.0012987	0	3
ILMN_1802799	AKIRIN1	0.0012987	0	0	3
ILMN_1658337	AKIRIN1	0.00779221	0.0012987	0.0012987	3
ILMN_2148847	AKIRIN2	0	0	0	3
ILMN_1770673	AKNA	0.0025974	0.0012987	0	3
ILMN_1728047	AKR1A1	0	0	0	3
ILMN_2380771	AKR1A1	0	0	0	3
ILMN_1701731	AKR1B1	0	0	0	3
ILMN_2412336	AKR1C2	0	0	0	3
ILMN_1713124	AKR1C3	0	0	0	3
ILMN_1687757	AKR1C4	0	0	0	3
ILMN_2157277	AKR1D1	0	0	0	3
ILMN_1677043	AKR7A2	0	0	0	3
ILMN_2145396	AKR7A3	0	0	0	3
ILMN_2388507	AKT1	0	0	0	3
ILMN_2410909	AKT1	0	0	0	3
ILMN_1748661	AKT1	0.0012987	0.0012987	0	3
ILMN_1726906	AKT1S1	0.0467533	0.0441558	0.0285714	3
ILMN_2377240	AKTIP	0	0	0	3
ILMN_1665982	AKTIP	0	0	0	3
ILMN_1747577	ALAD	0	0	0	3
ILMN_2367126	ALAS2	0.00519481	0.00519481	0.00779221	3
ILMN_1782939	ALB	0.0012987	0.0012987	0.0012987	3
ILMN_1670870	ALCAM	0	0	0	3
ILMN_2051381	ALDH16A1	0.0116883	0.0207792	0.00519481	3
ILMN_2302716	ALDH18A1	0.0025974	0	0	3
ILMN_2096372	ALDH1A1	0	0	0	3
ILMN_1709348	ALDH1A1	0	0	0	3
ILMN_1748538	ALDH1A2	0.0025974	0.0038961	0.00779221	3
ILMN_1807439	ALDH1A3	0.0012987	0.0025974	0.0025974	3
ILMN_2139970	ALDH1A3	0.0012987	0	0.0012987	3
ILMN_2150894	ALDH1B1	0.0025974	0.0038961	0.00519481	3
ILMN_1802167	ALDH1L1	0	0	0	3
ILMN_1793859	ALDH2	0	0	0	3
ILMN_1794825	ALDH3A2	0	0	0	3
ILMN_2401641	ALDH3A2	0.0012987	0	0	3
ILMN_2244841	ALDH4A1	0.0233766	0.0025974	0.0025974	3
ILMN_1656368	ALDH4A1	0	0	0	3
ILMN_1696099	ALDH4A1	0.0012987	0	0	3
ILMN_2406557	ALDH4A1	0.0025974	0	0	3
ILMN_2372403	ALDH5A1	0	0	0	3
ILMN_2372398	ALDH5A1	0	0	0	3
ILMN_1785284	ALDH6A1	0	0	0	3
ILMN_2096985	ALDH6A1	0	0	0	3
ILMN_1687508	ALDH7A1	0	0	0	3
ILMN_1763461	ALDH7A1	0	0	0	3
ILMN_2365176	ALDH8A1	0.0012987	0	0	3
ILMN_1761804	ALDH9A1	0	0	0	3
ILMN_1736700	ALDOA	0	0	0	3
ILMN_2251253	ALDOA	0.0025974	0.00649351	0.00909091	3
ILMN_1741148	ALDOA	0	0	0	3
ILMN_1755974	ALDOC	0	0	0	3
ILMN_1660856	ALG11	0.0025974	0.00649351	0.0285714	3
ILMN_1761456	ALG13	0.0012987	0	0	3
ILMN_1743635	ALG14	0.0012987	0.0012987	0	3
ILMN_2191822	ALG14	0.0025974	0.0220779	0.0324675	3
ILMN_2131293	ALG1L	0.0012987	0.00519481	0.0324675	3
ILMN_1711886	ALG3	0.0012987	0	0	3
ILMN_1664449	ALG5	0	0	0	3
ILMN_1771411	ALG6	0.0012987	0.0038961	0.0311688	3
ILMN_2365686	ALG8	0.0012987	0.0012987	0.0025974	3
ILMN_1685413	ALG8	0	0	0	3
ILMN_1732809	ALG9	0.0012987	0	0	3
ILMN_1753135	ALK	0.0012987	0.0012987	0.00519481	3
ILMN_1758038	ALKBH1	0.00519481	0.00649351	0.00519481	3
ILMN_2375973	ALKBH1	0.0025974	0.0012987	0.0038961	3
ILMN_1690252	ALKBH2	0.0025974	0	0	3
ILMN_2134062	ALKBH3	0.0012987	0	0	3
ILMN_1805673	ALKBH4	0.0038961	0.0038961	0.0038961	3
ILMN_1657283	ALKBH5	0	0	0	3
ILMN_1808792	ALKBH6	0.0012987	0	0	3
ILMN_1761764	ALKBH7	0.0012987	0	0	3
ILMN_1680996	ALOX5	0	0	0	3
ILMN_1797875	ALOX5AP	0	0	0	3
ILMN_1752669	ALPI	0.00779221	0.0116883	0.00519481	3
ILMN_1701603	ALPL	0	0	0	3
ILMN_1693789	ALPP	0	0	0	3
ILMN_1750256	ALS2	0	0	0	3
ILMN_1787314	ALS2CR14	0	0	0	3
ILMN_1800958	ALS2CR4	0.0012987	0	0	3
ILMN_1729325	ALX3	0.025974	0.0454546	0.0441558	3
ILMN_1759670	AMACR	0.00519481	0.0025974	0.0103896	3
ILMN_2367172	AMACR	0.0038961	0.0272727	0.0233766	3
ILMN_1788462	AMD1	0	0	0	3
ILMN_1667994	AMD1	0.0012987	0.0012987	0	3
ILMN_1723116	AMFR	0	0	0	3
ILMN_1727023	AMMECR1L	0.0025974	0.0012987	0.0025974	3
ILMN_1750880	AMN1	0.0025974	0.0012987	0.0038961	3
ILMN_1792409	AMOT	0	0	0	3
ILMN_1778788	AMOTL2	0.00779221	0.0012987	0	3
ILMN_1685834	AMPH	0	0	0	3
ILMN_1665331	AMT	0.0012987	0	0	3
ILMN_2294762	AMY1A	0	0	0	3
ILMN_1726327	AMY1B	0	0	0	3
ILMN_1663313	AMY1C	0	0	0	3
ILMN_1801303	AMY2A	0.0012987	0.0025974	0.0025974	3
ILMN_1801606	AMZ2	0	0	0	3
ILMN_1804812	ANAPC1	0.0012987	0	0	3
ILMN_1659553	ANAPC1	0.0025974	0.0012987	0.0038961	3
ILMN_1770378	ANAPC10	0.0012987	0	0	3
ILMN_2343563	ANAPC11	0	0	0	3
ILMN_1722102	ANAPC11	0	0	0	3
ILMN_1793894	ANAPC13	0	0	0	3
ILMN_1802973	ANAPC4	0.0012987	0	0	3
ILMN_1723177	ANAPC5	0	0	0	3
ILMN_1696974	ANG	0.0025974	0.0103896	0.0025974	3
ILMN_1760727	ANG	0.0025974	0	0	3
ILMN_1665871	ANGEL1	0.0012987	0	0	3
ILMN_1736340	ANGEL2	0	0	0	3
ILMN_1677723	ANGPT1	0.012987	0.0038961	0.00519481	3
ILMN_1772612	ANGPTL2	0	0	0	3
ILMN_2386444	ANGPTL4	0.0012987	0.0012987	0	3
ILMN_1707727	ANGPTL4	0	0	0	3
ILMN_1684694	ANK1	0.0025974	0	0	3
ILMN_1776363	ANK2	0	0	0	3
ILMN_1661875	ANK3	0.0168831	0.00649351	0.00519481	3
ILMN_2390609	ANK3	0.0012987	0	0	3
ILMN_1813139	ANKDD1A	0	0	0	3
ILMN_1794470	ANKFY1	0	0	0	3
ILMN_1801464	ANKFY1	0.0025974	0.0012987	0.0025974	3
ILMN_1765091	ANKHD1	0.0012987	0	0.0012987	3
ILMN_3241218	ANKIB1	0	0	0	3
ILMN_3249608	ANKLE2	0.0012987	0	0	3
ILMN_1675483	ANKMY1	0.0012987	0.0012987	0.0012987	3
ILMN_1784292	ANKMY2	0.0012987	0	0	3
ILMN_1687351	ANKRA2	0.0012987	0	0	3
ILMN_2185563	ANKRA2	0.0012987	0	0	3
ILMN_1711828	ANKRD10	0.0012987	0.0012987	0	3
ILMN_2115218	ANKRD10	0.0012987	0	0	3
ILMN_2108709	ANKRD11	0	0	0	3
ILMN_1661833	ANKRD12	0.0012987	0	0	3
ILMN_1689908	ANKRD13A	0	0	0	3
ILMN_1794070	ANKRD13B	0.038961	0.00779221	0.00519481	3
ILMN_2148507	ANKRD13C	0.0025974	0.0038961	0.0025974	3
ILMN_1672356	ANKRD13D	0.00779221	0.0012987	0.0025974	3
ILMN_1659156	ANKRD16	0.0012987	0.0012987	0.0025974	3
ILMN_2406335	ANKRD17	0.0012987	0.0012987	0.0025974	3
ILMN_1712019	ANKRD17	0.0012987	0	0	3
ILMN_2132599	ANKRD22	0.025974	0.00649351	0.00519481	3
ILMN_1768202	ANKRD24	0.0012987	0	0	3
ILMN_1794063	ANKRD27	0.0025974	0.0012987	0.0038961	3
ILMN_1697594	ANKRD28	0.00779221	0.00779221	0.0038961	3
ILMN_2232520	ANKRD28	0.0012987	0	0.0012987	3
ILMN_2075643	ANKRD29	0	0	0	3
ILMN_1749338	ANKRD29	0.0025974	0.0038961	0.00519481	3
ILMN_1730678	ANKRD30B	0	0	0	3
ILMN_1667748	ANKRD33	0	0	0	3
ILMN_2119793	ANKRD34A	0.0012987	0	0	3
ILMN_2145153	ANKRD35	0.0012987	0	0	3
ILMN_1798006	ANKRD35	0	0	0	3
ILMN_1756417	ANKRD37	0.0012987	0	0	3
ILMN_1776936	ANKRD38	0	0	0	3
ILMN_1710979	ANKRD39	0.0012987	0	0	3
ILMN_1758846	ANKRD40	0.0012987	0	0	3
ILMN_1779882	ANKRD43	0	0	0	3
ILMN_2059844	ANKRD44	0.0025974	0	0	3
ILMN_1712298	ANKRD46	0	0	0	3
ILMN_1755588	ANKRD47	0.0025974	0.0025974	0.0038961	3
ILMN_1669259	ANKRD49	0.0025974	0.0103896	0.0233766	3
ILMN_2226304	ANKRD50	0.0025974	0.0012987	0.0025974	3
ILMN_3244029	ANKRD52	0.0324675	0.00519481	0.00779221	3
ILMN_1766309	ANKRD54	0.0012987	0	0	3
ILMN_1724040	ANKRD57	0	0	0	3
ILMN_2178587	ANKRD6	0.0012987	0	0.0012987	3
ILMN_2048607	ANKRD9	0	0	0	3
ILMN_1813669	ANKS1A	0	0	0	3
ILMN_1758392	ANKS1B	0	0	0	3
ILMN_2340974	ANKS1B	0	0	0	3
ILMN_1751636	ANKS3	0.0350649	0.0038961	0.0038961	3
ILMN_1677487	ANKZF1	0.0025974	0.0012987	0.0025974	3
ILMN_1739645	ANLN	0	0	0	3
ILMN_1767111	ANO10	0.0025974	0	0	3
ILMN_2228215	ANO4	0.0025974	0.0025974	0.0103896	3
ILMN_1674941	ANO6	0.0012987	0.0012987	0	3
ILMN_1709124	ANO8	0.00779221	0.0012987	0.0038961	3
ILMN_1807945	ANP32A	0.0025974	0.048052	0.0025974	3
ILMN_1684293	ANP32B	0	0	0	3
ILMN_1670379	ANTXR1	0	0	0	3
ILMN_1811877	ANTXR1	0.0025974	0.0025974	0.0038961	3
ILMN_1812926	ANTXR2	0.0025974	0.0038961	0.0246753	3
ILMN_2184184	ANXA1	0.0012987	0	0	3
ILMN_2380494	ANXA11	0.0025974	0.0233766	0.0428571	3
ILMN_1685170	ANXA11	0.00519481	0.0025974	0.0038961	3
ILMN_2409167	ANXA2	0	0	0	3
ILMN_1698100	ANXA2P1	0.0025974	0.00519481	0.00649351	3
ILMN_2041101	ANXA2P1	0	0	0	3
ILMN_3235632	ANXA2P2	0	0	0	3
ILMN_1694548	ANXA3	0.0025974	0.0012987	0.0012987	3
ILMN_1741003	ANXA5	0	0	0	3
ILMN_2326591	ANXA6	0.00519481	0.00649351	0.0038961	3
ILMN_1678612	ANXA6	0.0012987	0.0012987	0.0012987	3
ILMN_1703791	ANXA7	0	0	0	3
ILMN_1709820	AOAH	0.025974	0.0207792	0.0207792	3
ILMN_1813840	AOF2	0.0012987	0	0	3
ILMN_1781983	AP1B1	0	0	0	3
ILMN_2399627	AP1G1	0.0012987	0.0012987	0	3
ILMN_2399622	AP1G1	0	0	0	3
ILMN_1754738	AP1M1	0	0	0	3
ILMN_1751345	AP1S1	0.0025974	0.0012987	0	3
ILMN_1712806	AP1S1	0.0012987	0	0	3
ILMN_2316173	AP1S1	0.0025974	0.0012987	0	3
ILMN_1766411	AP1S2	0	0	0	3
ILMN_2120273	AP1S2	0	0	0	3
ILMN_1815306	AP2A1	0.0155844	0	0	3
ILMN_1803779	AP2A2	0.0012987	0	0	3
ILMN_1681998	AP2B1	0.0025974	0	0	3
ILMN_2331735	AP2B1	0.0012987	0	0	3
ILMN_1699598	AP2M1	0	0	0	3
ILMN_2402798	AP2M1	0	0	0	3
ILMN_1662426	AP2S1	0	0	0	3
ILMN_1809957	AP2S1	0	0	0	3
ILMN_1768867	AP3B1	0	0	0	3
ILMN_1679256	AP3B2	0.0012987	0	0	3
ILMN_1764945	AP3D1	0.0012987	0	0	3
ILMN_2390114	AP3D1	0.0012987	0	0	3
ILMN_2362122	AP3M1	0.0012987	0	0	3
ILMN_1667086	AP3M1	0.0012987	0	0	3
ILMN_1676946	AP3M2	0	0	0	3
ILMN_2311761	AP3S1	0	0	0	3
ILMN_1731596	AP3S2	0.0012987	0	0	3
ILMN_1669377	AP4B1	0	0	0	3
ILMN_1754531	AP4E1	0.0012987	0.0012987	0	3
ILMN_1659463	APAF1	0.0012987	0	0	3
ILMN_1723626	APBA2	0.0012987	0	0	3
ILMN_2364928	APBA2BP	0.00909091	0.0103896	0.00519481	3
ILMN_1686610	APBA3	0.00519481	0	0	3
ILMN_1769918	APBB1	0.038961	0.0012987	0.0025974	3
ILMN_1801710	APBB1IP	0.0012987	0	0	3
ILMN_1740772	APBB3	0	0	0	3
ILMN_2320513	APBB3	0.0012987	0	0	3
ILMN_1659950	APC2	0.0012987	0	0	3
ILMN_1656951	APCDD1	0	0	0	3
ILMN_1740052	APEG1	0.0012987	0.0038961	0.0038961	3
ILMN_1718023	APEH	0	0	0	3
ILMN_2319344	APEX1	0	0	0	3
ILMN_1661886	APEX1	0	0	0	3
ILMN_1652505	APEX2	0.00779221	0	0	3
ILMN_1658472	APH1A	0	0	0	3
ILMN_2398388	APH1A	0.0012987	0.0012987	0.0025974	3
ILMN_1767816	APH1B	0.0025974	0.0012987	0	3
ILMN_1815051	API5	0	0	0	3
ILMN_1793598	APIP	0	0	0	3
ILMN_2128293	APIP	0.0012987	0.0012987	0.0025974	3
ILMN_1793360	APITD1	0.0025974	0.0038961	0.00519481	3
ILMN_1689353	APLN	0.0012987	0	0	3
ILMN_1700183	APLNR	0	0	0	3
ILMN_2396198	APLP1	0	0	0	3
ILMN_1763834	APLP1	0	0	0	3
ILMN_2081465	APLP2	0.0012987	0.0012987	0.0025974	3
ILMN_1710482	APLP2	0	0	0	3
ILMN_1796737	APM-1	0.0012987	0.0025974	0.0038961	3
ILMN_1729533	APOA1BP	0	0	0	3
ILMN_1675684	APOBEC3C	0.0220779	0.00779221	0.0233766	3
ILMN_2412172	APOBEC3F	0.0025974	0.0012987	0	3
ILMN_2232478	APOBEC3G	0.0025974	0.0207792	0.00519481	3
ILMN_1789007	APOC1	0	0	0	3
ILMN_1802923	APOC2	0.0012987	0	0	3
ILMN_1780170	APOD	0	0	0	3
ILMN_1740938	APOE	0	0	0	3
ILMN_2325338	APOL2	0.0025974	0.0012987	0	3
ILMN_2325337	APOL2	0.0025974	0	0	3
ILMN_1756862	APOL3	0.0025974	0.0012987	0	3
ILMN_1723522	APOLD1	0	0	0	3
ILMN_1721623	APOO	0	0	0	3
ILMN_2404065	APP	0	0	0	3
ILMN_2404063	APP	0	0	0	3
ILMN_2149766	APPBP2	0	0	0	3
ILMN_1763730	APPL1	0.0012987	0	0	3
ILMN_1765076	APPL2	0	0	0	3
ILMN_1722491	APRT	0.0012987	0	0	3
ILMN_1726410	APRT	0.0246753	0.0012987	0	3
ILMN_2317348	APTX	0	0	0	3
ILMN_1726752	APTX	0	0	0	3
ILMN_1776857	AQP1	0.0025974	0.0012987	0.0025974	3
ILMN_1681103	AQP1	0	0	0	3
ILMN_1762606	AQP11	0.0012987	0	0	3
ILMN_1676649	AQP4	0.0025974	0.0025974	0.00519481	3
ILMN_1747683	AQP4	0	0	0	3
ILMN_3245829	AQP7P1	0.00519481	0.00649351	0.00519481	3
ILMN_1717154	AQR	0.0025974	0.0012987	0	3
ILMN_1767351	AR	0.0324675	0.00519481	0.00779221	3
ILMN_1658883	ARAF	0.0012987	0	0	3
ILMN_3269719	ARAP1	0.0025974	0.0012987	0	3
ILMN_3244434	ARAP2	0	0.0012987	0.0025974	3
ILMN_1812618	ARAP3	0.0012987	0	0	3
ILMN_1699703	ARCN1	0	0	0	3
ILMN_1721977	ARD1A	0.0025974	0	0	3
ILMN_2330948	ARF1	0.0012987	0	0	3
ILMN_1802203	ARF1	0	0	0	3
ILMN_1682938	ARF3	0	0	0	3
ILMN_1723884	ARF4	0.0012987	0	0	3
ILMN_1719518	ARF4	0	0	0	3
ILMN_1752340	ARF5	0	0	0	3
ILMN_1675709	ARFGAP1	0.0025974	0	0	3
ILMN_1769250	ARFGAP2	0	0	0	3
ILMN_1731287	ARFGAP3	0.0012987	0	0	3
ILMN_1728471	ARFGEF1	0	0	0	3
ILMN_2403906	ARFIP1	0	0	0	3
ILMN_1800898	ARG2	0.0025974	0.0194805	0.00519481	3
ILMN_1788468	ARGLU1	0	0	0	3
ILMN_1732060	ARHGAP1	0	0	0	3
ILMN_2395913	ARHGAP11A	0.00519481	0.0038961	0.00779221	3
ILMN_1753500	ARHGAP12	0	0	0	3
ILMN_2208413	ARHGAP15	0.0012987	0.0012987	0.0012987	3
ILMN_1718610	ARHGAP17	0	0	0	3
ILMN_2398847	ARHGAP17	0.0324675	0.0207792	0.00519481	3
ILMN_1688953	ARHGAP19	0.0012987	0	0	3
ILMN_1782761	ARHGAP20	0.0025974	0.0012987	0.00519481	3
ILMN_1811592	ARHGAP21	0	0	0	3
ILMN_1676361	ARHGAP22	0.0012987	0	0	3
ILMN_1764571	ARHGAP23	0	0	0	3
ILMN_1775441	ARHGAP24	0.0025974	0.00649351	0.0428571	3
ILMN_2352633	ARHGAP24	0.0025974	0.0116883	0.00779221	3
ILMN_1765876	ARHGAP24	0.0025974	0.0012987	0.0025974	3
ILMN_1801833	ARHGAP24	0.0012987	0	0	3
ILMN_1777998	ARHGAP25	0.0038961	0.0012987	0.0025974	3
ILMN_1750805	ARHGAP30	0.0025974	0.0012987	0.0025974	3
ILMN_1770824	ARHGAP4	0.0025974	0.0012987	0	3
ILMN_2322747	ARHGAP5	0.0025974	0.0012987	0.00779221	3
ILMN_1663916	ARHGAP9	0.0025974	0	0	3
ILMN_1734742	ARHGDIA	0	0	0	3
ILMN_1678143	ARHGDIB	0	0	0	3
ILMN_2049274	ARHGDIG	0.0012987	0	0	3
ILMN_2405129	ARHGEF1	0.00779221	0.0012987	0	3
ILMN_2132809	ARHGEF10	0	0	0	3
ILMN_1727205	ARHGEF10L	0	0	0	3
ILMN_2389445	ARHGEF10L	0.0324675	0.0207792	0.00519481	3
ILMN_2347380	ARHGEF11	0.0025974	0.0025974	0.0025974	3
ILMN_1733861	ARHGEF11	0.0025974	0.0012987	0	3
ILMN_1810712	ARHGEF12	0.0012987	0	0	3
ILMN_1669928	ARHGEF16	0.00779221	0.0012987	0.0038961	3
ILMN_1754562	ARHGEF17	0.0012987	0	0	3
ILMN_1664016	ARHGEF18	0	0	0	3
ILMN_1703477	ARHGEF2	0	0	0	3
ILMN_1781010	ARHGEF3	0	0	0	3
ILMN_1666076	ARHGEF4	0	0	0	3
ILMN_2342282	ARHGEF4	0.0311688	0.0012987	0.00519481	3
ILMN_1803423	ARHGEF6	0	0	0	3
ILMN_1796912	ARHGEF7	0	0	0	3
ILMN_2235679	ARHGEF7	0.0012987	0	0.0012987	3
ILMN_1798587	ARHGEF7	0	0	0	3
ILMN_1779370	ARHGEF9	0.0012987	0	0.0012987	3
ILMN_1797341	ARID1A	0	0	0	3
ILMN_1670130	ARID3A	0.0012987	0	0.0012987	3
ILMN_1696956	ARID3B	0.012987	0.0038961	0.0025974	3
ILMN_1810229	ARID4A	0.0025974	0.00779221	0.0038961	3
ILMN_1721626	ARID5B	0	0	0	3
ILMN_1694219	ARIH1	0.0025974	0.0181818	0.00519481	3
ILMN_1792825	ARIH2	0	0	0	3
ILMN_1813091	ARL1	0	0	0	3
ILMN_2403047	ARL13B	0.00779221	0.0220779	0.00519481	3
ILMN_1774161	ARL15	0.00779221	0.0194805	0.0233766	3
ILMN_2188119	ARL16	0	0	0	3
ILMN_1679917	ARL16	0.0012987	0	0	3
ILMN_3231952	ARL17B	0.0025974	0.0025974	0.0038961	3
ILMN_1698680	ARL17P1	0.0025974	0.0025974	0.0168831	3
ILMN_1787879	ARL2	0	0	0	3
ILMN_1755391	ARL2BP	0	0	0	3
ILMN_1780444	ARL3	0.0012987	0	0	3
ILMN_1775405	ARL4A	0.0025974	0.0038961	0.0155844	3
ILMN_1768391	ARL4C	0.0025974	0.0428571	0.00779221	3
ILMN_1771738	ARL5A	0.00519481	0.0038961	0.0038961	3
ILMN_2332558	ARL5A	0.0012987	0	0	3
ILMN_1688526	ARL5A	0	0	0	3
ILMN_1708416	ARL6IP1	0	0	0	3
ILMN_2113362	ARL6IP1	0.0012987	0.0012987	0.0012987	3
ILMN_1791149	ARL6IP4	0	0	0	3
ILMN_2393144	ARL6IP4	0	0	0	3
ILMN_1769810	ARL6IP5	0	0	0	3
ILMN_1797964	ARL6IP6	0	0	0	3
ILMN_1752837	ARL8B	0	0	0	3
ILMN_1722066	ARMC1	0.0012987	0	0	3
ILMN_1689296	ARMC10	0.0012987	0.0012987	0.0025974	3
ILMN_2052598	ARMC10	0	0	0	3
ILMN_1697088	ARMC5	0.00779221	0.0038961	0.00779221	3
ILMN_1697118	ARMC6	0.0025974	0.0012987	0.0012987	3
ILMN_1781151	ARMC8	0.0012987	0.0012987	0.0025974	3
ILMN_2180677	ARMCX1	0.0012987	0	0.0025974	3
ILMN_1788192	ARMCX1	0	0	0	3
ILMN_1785170	ARMCX2	0	0	0	3
ILMN_2334760	ARMCX3	0	0	0	3
ILMN_2334765	ARMCX3	0	0.0012987	0	3
ILMN_1741156	ARMCX5	0.0025974	0.00649351	0.0207792	3
ILMN_2414533	ARMCX6	0.0012987	0	0	3
ILMN_1716026	ARMCX6	0.0025974	0.0012987	0.0025974	3
ILMN_2183510	ARMET	0	0	0	3
ILMN_2347314	ARNT	0.0012987	0.00779221	0.00519481	3
ILMN_1718046	ARNT2	0	0	0	3
ILMN_2405305	ARNTL	0.0025974	0.0025974	0.0168831	3
ILMN_1759915	ARPC1A	0	0	0	3
ILMN_2085760	ARPC1B	0.0025974	0.0012987	0.0025974	3
ILMN_1792489	ARPC2	0	0	0	3
ILMN_1655561	ARPC3	0	0	0	3
ILMN_2393763	ARPC4	0.0012987	0	0	3
ILMN_1707336	ARPC4	0	0	0	3
ILMN_1768394	ARPC5	0	0	0	3
ILMN_2043816	ARPC5L	0	0	0	3
ILMN_1772798	ARPP19	0	0	0	3
ILMN_2059505	ARPP19	0	0	0	3
ILMN_2289825	ARPP-21	0.0012987	0	0	3
ILMN_1672161	ARPP-21	0.0025974	0.0012987	0.0012987	3
ILMN_2325168	ARRB1	0.0025974	0	0	3
ILMN_1730620	ARRB1	0.0025974	0	0	3
ILMN_1715181	ARRDC2	0.0012987	0.0012987	0.0025974	3
ILMN_1655612	ARRDC2	0.0012987	0	0	3
ILMN_2198515	ARRDC3	0.0025974	0.012987	0.00519481	3
ILMN_1660544	ARRDC4	0.0012987	0.0012987	0.0025974	3
ILMN_2358202	ARS2	0	0	0	3
ILMN_2047240	ARSA	0.0012987	0	0	3
ILMN_2242937	ARSB	0.0012987	0.0012987	0	3
ILMN_1684873	ARSD	0.0025974	0	0	3
ILMN_1657050	ARSK	0.00779221	0.00779221	0.00519481	3
ILMN_1693218	ART3	0.0038961	0.0207792	0.0181818	3
ILMN_1805773	ART4	0.0272727	0.0467533	0.0207792	3
ILMN_1800935	ARV1	0	0	0	3
ILMN_1771732	AS3MT	0.00519481	0.0311688	0.00779221	3
ILMN_1684054	ASAH1	0.0025974	0.0012987	0	3
ILMN_2233366	ASAP1	0.0012987	0	0	3
ILMN_3245057	ASAP1	0	0	0	3
ILMN_1690963	ASAP1	0	0	0	3
ILMN_3270972	ASAP2	0.0012987	0.0012987	0.0012987	3
ILMN_3194508	ASAP2	0	0	0	3
ILMN_1685441	ASAP3	0	0	0	3
ILMN_1683096	ASB1	0	0	0	3
ILMN_1654385	ASB13	0.0025974	0.0012987	0	3
ILMN_2358784	ASB3	0	0	0	3
ILMN_2358783	ASB3	0	0	0	3
ILMN_1699606	ASB3	0.0025974	0.00649351	0.0025974	3
ILMN_1806705	ASB6	0.0025974	0.0012987	0.0012987	3
ILMN_2397776	ASB6	0.0025974	0.0025974	0.0038961	3
ILMN_2173740	ASB8	0	0	0	3
ILMN_1783675	ASB8	0	0	0	3
ILMN_1685097	ASCC1	0	0	0	3
ILMN_1679919	ASCC2	0	0	0	3
ILMN_1745772	ASCC3	0.0012987	0.0012987	0	3
ILMN_2294751	ASCC3	0.0025974	0.00519481	0.00519481	3
ILMN_1701653	ASCL1	0	0	0	3
ILMN_1714737	ASF1A	0.0012987	0	0.0012987	3
ILMN_1769013	ASGR1	0.0025974	0	0	3
ILMN_1782032	ASH1L	0.00519481	0.0025974	0.00519481	3
ILMN_1666933	ASH2L	0	0	0	3
ILMN_2379393	ASL	0.00779221	0.00779221	0.00779221	3
ILMN_1804384	ASMTL	0.0025974	0.0012987	0	3
ILMN_1732615	ASMTL	0.0012987	0	0	3
ILMN_1689786	ASMTL	0.0012987	0	0	3
ILMN_1657571	ASNA1	0.0142857	0.0272727	0.0168831	3
ILMN_1796417	ASNS	0	0	0	3
ILMN_2398107	ASNS	0	0	0	3
ILMN_2221673	ASNSD1	0	0	0	3
ILMN_1692824	ASPA	0	0	0	3
ILMN_1662390	ASPHD1	0	0	0	3
ILMN_1708950	ASPHD1	0	0	0	3
ILMN_2167426	ASPHD2	0.0025974	0.0012987	0	3
ILMN_1762284	ASPRV1	0.00779221	0.00649351	0.0025974	3
ILMN_1688180	ASPSCR1	0.0337662	0.0207792	0.0038961	3
ILMN_1660749	ASPSCR1	0	0	0	3
ILMN_1810199	ASRGL1	0.0012987	0	0	3
ILMN_1708778	ASS1	0.0012987	0	0	3
ILMN_2395451	ASS1	0	0	0	3
ILMN_1803813	ASTE1	0.0233766	0.012987	0.00779221	3
ILMN_1684959	ASTN1	0	0	0	3
ILMN_1744118	ASTN2	0	0	0	3
ILMN_2381559	ASTN2	0.00519481	0.0038961	0.0038961	3
ILMN_1726025	ASXL1	0.0012987	0	0	3
ILMN_1698968	ASXL2	0.0012987	0	0	3
ILMN_1654497	ATAD1	0	0	0	3
ILMN_2169983	ATAD1	0	0	0	3
ILMN_1738530	ATAD3A	0.00779221	0.0012987	0	3
ILMN_1801923	ATF1	0.0402597	0.0181818	0.00519481	3
ILMN_1748271	ATF2	0.0155844	0.0168831	0.0142857	3
ILMN_2374865	ATF3	0	0	0	3
ILMN_1672128	ATF4	0	0	0	3
ILMN_2358457	ATF4	0.0012987	0	0	3
ILMN_1669113	ATF5	0.0012987	0	0	3
ILMN_1703471	ATF6	0.0012987	0	0	3
ILMN_3194911	ATF6B	0.0415584	0.0376623	0.0298701	3
ILMN_1748968	ATG10	0	0	0	3
ILMN_2188204	ATG12	0	0	0	3
ILMN_1725707	ATG16L1	0	0	0	3
ILMN_2365881	ATG16L1	0	0	0	3
ILMN_1664644	ATG16L2	0.0025974	0.0012987	0.0025974	3
ILMN_1756006	ATG2A	0.00779221	0	0	3
ILMN_1769566	ATG3	0	0	0	3
ILMN_2313782	ATG4A	0.0012987	0.0025974	0.0025974	3
ILMN_3307158	ATG4A	0.0025974	0.0012987	0.0012987	3
ILMN_2411915	ATG4B	0.0025974	0.0012987	0	3
ILMN_1700923	ATG4C	0	0	0	3
ILMN_1801905	ATG4D	0.0246753	0.00779221	0.0025974	3
ILMN_1718265	ATG5	0.0025974	0.0012987	0.0038961	3
ILMN_1790978	ATG7	0	0	0	3
ILMN_2410975	ATG9A	0	0	0	3
ILMN_1739008	ATG9A	0.0012987	0	0	3
ILMN_1673991	ATIC	0	0	0	3
ILMN_3255124	ATL1	0	0	0	3
ILMN_3181411	ATL1	0	0	0	3
ILMN_1751086	ATL3	0.00519481	0.0116883	0.00519481	3
ILMN_2370825	ATM	0.0012987	0	0	3
ILMN_1779214	ATM	0.0012987	0	0	3
ILMN_1772540	ATMIN	0.0012987	0	0	3
ILMN_2223720	ATMIN	0	0	0.0012987	3
ILMN_1737833	ATN1	0.0012987	0	0	3
ILMN_1654065	ATOH8	0.00779221	0.0012987	0.0012987	3
ILMN_1670609	ATOX1	0	0	0	3
ILMN_3307935	ATP10A	0.0025974	0.0012987	0.0025974	3
ILMN_1698804	ATP10B	0	0	0	3
ILMN_2124155	ATP11B	0.0025974	0.00649351	0.00519481	3
ILMN_1804137	ATP11C	0.0233766	0.0103896	0.00649351	3
ILMN_2134224	ATP13A1	0	0	0	3
ILMN_1704164	ATP13A2	0.0012987	0	0	3
ILMN_1651303	ATP13A4	0.00779221	0.0038961	0.00649351	3
ILMN_1731783	ATP1A1	0	0	0	3
ILMN_2415189	ATP1A1	0	0	0	3
ILMN_1775566	ATP1A1	0	0	0	3
ILMN_1777411	ATP1A2	0	0	0	3
ILMN_1689098	ATP1A3	0.00519481	0.0012987	0	3
ILMN_1658071	ATP1B1	0	0	0	3
ILMN_2407824	ATP1B1	0	0	0	3
ILMN_1730291	ATP1B1	0	0	0	3
ILMN_1747271	ATP1B2	0	0	0	3
ILMN_1783304	ATP1B3	0	0	0	3
ILMN_1654322	ATP1B3	0.0025974	0.0012987	0.0012987	3
ILMN_1759628	ATP1B3	0	0	0	3
ILMN_1655884	ATP2A2	0	0	0	3
ILMN_1687375	ATP2A2	0	0	0	3
ILMN_1815666	ATP2A2	0	0	0	3
ILMN_2401933	ATP2B1	0.0012987	0.0012987	0.00519481	3
ILMN_1802223	ATP2B2	0	0	0	3
ILMN_2381938	ATP2B2	0	0	0	3
ILMN_1693481	ATP2B3	0.00779221	0.00779221	0.0246753	3
ILMN_1660741	ATP2B3	0.00519481	0.0116883	0.0311688	3
ILMN_2415073	ATP2B3	0.00519481	0.0038961	0.0207792	3
ILMN_1664772	ATP2B4	0.00519481	0.0038961	0.00779221	3
ILMN_1680579	ATP2B4	0	0	0	3
ILMN_2367753	ATP2B4	0	0	0	3
ILMN_1696568	ATP2C1	0	0	0	3
ILMN_1758784	ATP2C1	0.0025974	0.0012987	0.00519481	3
ILMN_2340565	ATP2C1	0	0	0	3
ILMN_1785413	ATP2C2	0.0402597	0.0194805	0.0272727	3
ILMN_2341363	ATP5A1	0	0	0	3
ILMN_1764494	ATP5A1	0	0	0	3
ILMN_1772132	ATP5B	0	0	0	3
ILMN_1701269	ATP5C1	0	0	0	3
ILMN_1679178	ATP5D	0.0025974	0	0	3
ILMN_1653599	ATP5D	0	0	0	3
ILMN_3261197	ATP5E	0	0	0	3
ILMN_1756674	ATP5EP2	0	0	0	3
ILMN_2225887	ATP5EP2	0	0	0	3
ILMN_1672191	ATP5F1	0	0	0	3
ILMN_1721989	ATP5F1	0	0	0	3
ILMN_1712430	ATP5G1	0.0012987	0.0012987	0	3
ILMN_1676393	ATP5G1	0	0	0	3
ILMN_1807798	ATP5G2	0.0350649	0.0220779	0.012987	3
ILMN_1669102	ATP5G2	0.00519481	0.0012987	0.0025974	3
ILMN_1660577	ATP5G2	0	0	0	3
ILMN_1770466	ATP5G3	0.0012987	0.0038961	0.0311688	3
ILMN_1794912	ATP5H	0	0	0	3
ILMN_1666372	ATP5H	0	0	0	3
ILMN_1726603	ATP5I	0	0	0	3
ILMN_1772506	ATP5I	0	0	0	3
ILMN_1652806	ATP5J	0	0	0	3
ILMN_1772929	ATP5J	0	0	0	3
ILMN_2348093	ATP5J	0	0	0	3
ILMN_2307883	ATP5J2	0	0	0	3
ILMN_2310621	ATP5J2	0	0	0	3
ILMN_2079285	ATP5L	0	0	0	3
ILMN_1812638	ATP5L	0	0	0	3
ILMN_1791332	ATP5O	0	0	0	3
ILMN_1700625	ATP5S	0.0025974	0.0012987	0.0025974	3
ILMN_1679188	ATP5S	0.0012987	0	0	3
ILMN_2299843	ATP5S	0.0025974	0.0012987	0.0038961	3
ILMN_1809027	ATP5SL	0	0	0	3
ILMN_1697694	ATP6AP1	0	0	0	3
ILMN_1677440	ATP6AP2	0	0	0	3
ILMN_1752579	ATP6V0A1	0	0	0	3
ILMN_1700380	ATP6V0A2	0.0012987	0.0012987	0.0012987	3
ILMN_1721391	ATP6V0B	0	0	0	3
ILMN_2353642	ATP6V0B	0	0	0	3
ILMN_1773849	ATP6V0C	0	0	0	3
ILMN_1789005	ATP6V0C	0	0	0	3
ILMN_1795826	ATP6V0D1	0	0	0	3
ILMN_1715635	ATP6V0E1	0	0	0	3
ILMN_2071937	ATP6V0E1	0	0	0	3
ILMN_1785095	ATP6V0E2	0	0	0	3
ILMN_1711516	ATP6V1A	0	0	0	3
ILMN_1787705	ATP6V1B2	0	0	0	3
ILMN_1659801	ATP6V1C1	0	0	0	3
ILMN_1797310	ATP6V1D	0	0	0	3
ILMN_2339779	ATP6V1E1	0	0	0	3
ILMN_1798485	ATP6V1E1	0	0	0	3
ILMN_1810235	ATP6V1E2	0.0025974	0.0012987	0.0025974	3
ILMN_2099783	ATP6V1F	0	0	0	3
ILMN_1784523	ATP6V1G1	0	0	0	3
ILMN_1654541	ATP6V1G2	0	0	0	3
ILMN_1674778	ATP6V1G2	0	0	0	3
ILMN_2403730	ATP6V1H	0	0	0	3
ILMN_1722056	ATP7B	0.00779221	0.0038961	0.0038961	3
ILMN_1782057	ATP8B2	0.0012987	0	0	3
ILMN_1783956	ATP8B4	0.0012987	0	0	3
ILMN_2089073	ATP9A	0	0	0	3
ILMN_1658684	ATP9B	0.0038961	0.0012987	0.0025974	3
ILMN_1790603	ATPAF1	0	0	0	3
ILMN_2395055	ATPAF1	0	0	0	3
ILMN_1721741	ATPBD1B	0	0	0	3
ILMN_2140207	ATPBD4	0.0012987	0.0038961	0.0038961	3
ILMN_1782085	ATPBD4	0.0324675	0.00649351	0.0038961	3
ILMN_1725746	ATPGD1	0	0	0	3
ILMN_3237981	ATPGD1	0	0	0	3
ILMN_1727332	ATPIF1	0	0	0	3
ILMN_1685978	ATPIF1	0.0012987	0.0012987	0.0012987	3
ILMN_2370464	ATRIP	0.0402597	0.0012987	0.0025974	3
ILMN_1772124	ATRN	0	0	0	3
ILMN_1800951	ATXN1	0	0	0	3
ILMN_2153332	ATXN1	0	0	0	3
ILMN_1705900	ATXN10	0.0012987	0.0012987	0	3
ILMN_2169676	ATXN10	0.00779221	0.00519481	0.0428571	3
ILMN_3233871	ATXN1L	0.0012987	0	0	3
ILMN_1743829	ATXN2	0	0	0	3
ILMN_2393497	ATXN3	0.0025974	0	0	3
ILMN_1777260	ATXN7L1	0.0025974	0.0038961	0.0038961	3
ILMN_1862018	ATXN7L3	0.0012987	0	0	3
ILMN_2231911	AUH	0	0	0	3
ILMN_1651378	AUP1	0.0012987	0	0	3
ILMN_1768396	AURKAIP1	0	0	0	3
ILMN_1749081	AUTS2	0	0	0	3
ILMN_1671731	AVPI1	0	0	0	3
ILMN_1698324	AVPR2	0.00779221	0.0025974	0.00779221	3
ILMN_1766185	AXIN1	0.0025974	0	0	3
ILMN_1724480	AXIN2	0.0012987	0	0	3
ILMN_1701877	AXL	0	0	0	3
ILMN_2364521	AXL	0	0	0	3
ILMN_1703123	AXUD1	0	0	0	3
ILMN_1754400	AYP1p1	0.0012987	0	0	3
ILMN_1797154	AZGP1	0.0025974	0.0012987	0.0012987	3
ILMN_1746206	AZI1	0	0	0	3
ILMN_1733680	AZI2	0.0012987	0.0025974	0.0012987	3
ILMN_1656682	AZIN1	0	0	0	3
ILMN_2327994	AZIN1	0.0012987	0.0012987	0	3
ILMN_2148459	B2M	0	0	0	3
ILMN_1725427	B2M	0	0	0	3
ILMN_1787595	B3GALNT1	0.0012987	0	0	3
ILMN_2325347	B3GALNT1	0	0	0	3
ILMN_1709907	B3GALT2	0.0025974	0.0155844	0.0246753	3
ILMN_1690682	B3GALT4	0.00779221	0.0038961	0.00649351	3
ILMN_1739749	B3GALT6	0.0025974	0	0	3
ILMN_1764813	B3GALTL	0.0025974	0.0012987	0.0038961	3
ILMN_2371440	B3GAT1	0	0	0	3
ILMN_1761093	B3GAT1	0	0	0	3
ILMN_3246214	B3GNT1	0	0	0	3
ILMN_1711102	B3GNT2	0.0038961	0.0337662	0.0311688	3
ILMN_1715384	B3GNT6	0	0	0	3
ILMN_1805725	B4GALNT1	0.0012987	0.0012987	0.0025974	3
ILMN_1796663	B4GALNT4	0.0025974	0.0012987	0.0012987	3
ILMN_1692267	B4GALT3	0.0012987	0	0	3
ILMN_1661500	B4GALT4	0.0025974	0.0012987	0.0025974	3
ILMN_1685824	B4GALT5	0	0	0	3
ILMN_1732555	B4GALT6	0.0012987	0.0012987	0.00519481	3
ILMN_1663541	B4GALT7	0.0012987	0	0	3
ILMN_3239284	B9D1	0.00519481	0.0012987	0.0038961	3
ILMN_1806999	B9D2	0	0	0	3
ILMN_1687751	BAALC	0	0	0	3
ILMN_1707717	BAALC	0.0025974	0.0012987	0	3
ILMN_2320349	BACE1	0	0	0	3
ILMN_1797804	BACE1	0.0025974	0.0012987	0	3
ILMN_1669323	BACE2	0.0025974	0.0012987	0.0038961	3
ILMN_1738652	BAD	0.0012987	0	0	3
ILMN_1659766	BAG3	0	0	0	3
ILMN_2361695	BAG5	0	0	0	3
ILMN_1728514	BAG5	0.0012987	0.0012987	0	3
ILMN_1739256	BAHD1	0.0337662	0.0311688	0.0324675	3
ILMN_1729529	BAI1	0.00519481	0.0012987	0	3
ILMN_1773109	BAI2	0.00779221	0.0207792	0.0038961	3
ILMN_1671076	BAI3	0	0	0	3
ILMN_1705922	BAIAP2	0.0038961	0.0012987	0.0012987	3
ILMN_1771652	BAIAP2L2	0.0025974	0.0116883	0.0246753	3
ILMN_1691410	BAMBI	0	0	0	3
ILMN_2179837	BANF1	0	0	0	3
ILMN_1663631	BANP	0	0	0	3
ILMN_1701216	BANP	0.00519481	0.0012987	0	3
ILMN_1768363	BAP1	0.0025974	0	0	3
ILMN_2074258	BARD1	0.00519481	0.0012987	0.0012987	3
ILMN_1737662	BARHL1	0.0168831	0.0012987	0.0012987	3
ILMN_1651826	BASP1	0	0	0	3
ILMN_1686626	BAT1	0	0	0	3
ILMN_1760563	BAT2	0.0025974	0	0	3
ILMN_2408179	BAT2	0.0025974	0.0012987	0	3
ILMN_1743137	BAT2D1	0	0	0	3
ILMN_3247802	BAT2L	0.0012987	0	0	3
ILMN_1705364	BAT3	0.0025974	0	0	3
ILMN_2390416	BAT3	0.0012987	0	0	3
ILMN_2152402	BAT5	0.0012987	0	0	3
ILMN_2321064	BAX	0.0012987	0	0	3
ILMN_1658327	BAZ1A	0.0168831	0.048052	0.0246753	3
ILMN_1680831	BAZ1B	0	0	0	3
ILMN_1720850	BAZ2B	0	0	0	3
ILMN_1729645	BBC3	0.0025974	0.0012987	0.0012987	3
ILMN_1734929	BBOX1	0	0	0	3
ILMN_1800590	BBS1	0.0012987	0	0	3
ILMN_1741985	BBS10	0.0025974	0.0038961	0.00779221	3
ILMN_2230035	BBS2	0	0	0	3
ILMN_1767612	BBS2	0	0	0	3
ILMN_1762466	BBS4	0.0012987	0	0	3
ILMN_1775012	BBS7	0.0012987	0.0012987	0.0025974	3
ILMN_2257833	BBS7	0	0	0	3
ILMN_1794956	BBS9	0.0025974	0.0012987	0.0012987	3
ILMN_1745415	BBX	0.0012987	0	0	3
ILMN_2246131	BCAN	0	0	0	3
ILMN_1732154	BCAN	0	0	0	3
ILMN_2342084	BCAP29	0.0012987	0.0038961	0.00519481	3
ILMN_1737380	BCAP29	0.0012987	0	0	3
ILMN_1812403	BCAP31	0	0	0	3
ILMN_1672596	BCAR1	0.00519481	0	0	3
ILMN_1763638	BCAR3	0.0012987	0	0	3
ILMN_1733042	BCAS1	0	0	0	3
ILMN_2136147	BCAS1	0	0	0	3
ILMN_1808059	BCAS4	0.0012987	0	0	3
ILMN_2325506	BCAS4	0	0	0	3
ILMN_1766169	BCAT1	0	0	0	3
ILMN_1695110	BCAT2	0.0012987	0	0	3
ILMN_1771966	BCCIP	0	0	0	3
ILMN_1811188	BCCIP	0.0012987	0.0012987	0	3
ILMN_1786433	BCCIP	0.0012987	0.0012987	0	3
ILMN_1796113	BCDIN3D	0.0012987	0.0012987	0	3
ILMN_2176592	BCHE	0.0012987	0	0	3
ILMN_1685641	BCHE	0.0025974	0.0207792	0.00519481	3
ILMN_1735979	BCKDHA	0	0	0	3
ILMN_1764166	BCKDHB	0.0012987	0	0	3
ILMN_1655433	BCKDHB	0.0025974	0.0025974	0.0415584	3
ILMN_1693394	BCKDK	0	0	0	3
ILMN_2255133	BCL11A	0.0012987	0.00519481	0.0025974	3
ILMN_1752899	BCL11A	0.0012987	0.0012987	0	3
ILMN_2342271	BCL11A	0.00649351	0.00649351	0.0168831	3
ILMN_1801119	BCL2	0	0	0	3
ILMN_2246956	BCL2	0	0	0	3
ILMN_1654118	BCL2L1	0	0	0	3
ILMN_1742410	BCL2L1	0.0311688	0.0376623	0.00779221	3
ILMN_2396982	BCL2L12	0.00519481	0.0012987	0.0038961	3
ILMN_1752953	BCL2L12	0.00779221	0.00519481	0.0168831	3
ILMN_2181445	BCL2L13	0	0	0	3
ILMN_1746561	BCL2L2	0	0	0	3
ILMN_1737314	BCL6	0	0	0	3
ILMN_1651285	BCL6B	0.0038961	0.0012987	0.00519481	3
ILMN_1706886	BCL7A	0.0324675	0.0038961	0.00909091	3
ILMN_1754199	BCL7B	0.0025974	0.00519481	0.0012987	3
ILMN_2367275	BCL7B	0.00519481	0	0	3
ILMN_2371147	BCL7C	0.0025974	0	0	3
ILMN_1704452	BCL9	0	0	0	3
ILMN_1775192	BCLAF1	0	0	0	3
ILMN_2357272	BCLAF1	0.0012987	0.0038961	0.0025974	3
ILMN_1773117	BCOR	0	0	0	3
ILMN_1767015	BCORL1	0.0012987	0.0012987	0.0025974	3
ILMN_1670398	BCR	0.0116883	0.0012987	0.0025974	3
ILMN_1738529	BCS1L	0.0025974	0	0	3
ILMN_1678757	BCYRN1	0	0	0	3
ILMN_1799280	BDH1	0.0402597	0.0116883	0.0207792	3
ILMN_1684086	BDKRB2	0.0415584	0.0337662	0.0142857	3
ILMN_1751276	BDNF	0.0025974	0.0038961	0.00779221	3
ILMN_1744822	BECN1	0	0	0	3
ILMN_1668924	BEGAIN	0.0012987	0	0	3
ILMN_3237256	BEND4	0.0025974	0.0012987	0.0012987	3
ILMN_3237448	BEND5	0.0012987	0	0	3
ILMN_1706969	BEND6	0	0	0	3
ILMN_3230880	BEND7	0.0025974	0.0012987	0	3
ILMN_1718982	BEST1	0	0	0	3
ILMN_1684042	BET1	0.0012987	0.00649351	0.00779221	3
ILMN_2060652	BET1L	0.0025974	0.00519481	0.00649351	3
ILMN_1702637	BEX1	0	0	0	3
ILMN_2234697	BEX1	0	0	0	3
ILMN_2181892	BEX2	0	0	0	3
ILMN_2351638	BEX4	0	0	0	3
ILMN_1806473	BEX5	0	0	0	3
ILMN_1804798	BEXL1	0	0	0	3
ILMN_1814808	BFAR	0.0025974	0	0	3
ILMN_1755818	BGLAP	0.0350649	0.00649351	0.0038961	3
ILMN_2206746	BGN	0	0	0	3
ILMN_1768534	BHLHB2	0	0	0	3
ILMN_1726809	BHLHB3	0	0	0	3
ILMN_1708131	BHLHB9	0	0	0	3
ILMN_1699585	BHLHE22	0.0012987	0.0012987	0	3
ILMN_2380418	BICD2	0.0012987	0	0	3
ILMN_1763386	BID	0.0025974	0.0012987	0.0012987	3
ILMN_2309245	BIN1	0	0	0	3
ILMN_1674160	BIN1	0	0	0	3
ILMN_2182704	BIRC2	0	0	0	3
ILMN_1768194	BIRC2	0.0025974	0.0103896	0.00649351	3
ILMN_2405684	BIRC3	0	0	0	3
ILMN_1801605	BIRC6	0.0012987	0	0.0012987	3
ILMN_1805826	BIVM	0.0012987	0	0	3
ILMN_2214098	BIVM	0.0012987	0	0	3
ILMN_1675612	BLCAP	0	0	0	3
ILMN_1721921	BLMH	0	0	0	3
ILMN_2157510	BLOC1S1	0	0	0	3
ILMN_1679782	BLOC1S2	0.0012987	0.0012987	0.0012987	3
ILMN_1691436	BLVRA	0	0	0	3
ILMN_1797793	BLVRB	0	0	0	3
ILMN_2106656	BLZF1	0	0	0	3
ILMN_2106658	BLZF1	0	0	0	3
ILMN_1700915	BMI1	0	0	0	3
ILMN_1800412	BMP1	0.00909091	0.0038961	0.0038961	3
ILMN_1740900	BMP4	0.00779221	0.0207792	0.00519481	3
ILMN_1747650	BMP6	0.0025974	0.0012987	0.00519481	3
ILMN_1741566	BMP7	0	0	0	3
ILMN_2123415	BMP8B	0	0	0	3
ILMN_1706957	BMPR1A	0.0012987	0.0012987	0.0025974	3
ILMN_2070896	BMPR2	0	0	0	3
ILMN_1789095	BMPR2	0	0	0	3
ILMN_1772713	BMS1	0	0	0	3
ILMN_3238183	BMS1P5	0	0	0	3
ILMN_1734410	BNIP1	0.0025974	0.0038961	0.0025974	3
ILMN_2318733	BNIP1	0.0025974	0.0012987	0.0025974	3
ILMN_1770803	BNIP2	0.0012987	0	0	3
ILMN_1724658	BNIP3	0	0	0	3
ILMN_2045419	BNIP3L	0.0012987	0	0	3
ILMN_1718961	BNIP3L	0	0	0	3
ILMN_1689172	BOAT	0.0233766	0.00649351	0.0038961	3
ILMN_1730032	BOK	0	0	0	3
ILMN_1782633	BOLA2	0	0	0	3
ILMN_1656382	BOLA2	0.0376623	0.0142857	0.0467533	3
ILMN_2298511	BOLA2	0	0	0	3
ILMN_1659343	BOLA2	0	0	0	3
ILMN_1810680	BOLA2	0.0038961	0.0012987	0	3
ILMN_1786658	BOLA3	0	0	0	3
ILMN_2343010	BOLA3	0	0	0	3
ILMN_1715583	BOP1	0	0	0	3
ILMN_2352921	BPGM	0.0012987	0.0012987	0.0038961	3
ILMN_1657746	BPHL	0	0	0	3
ILMN_1738027	BRCA1	0.00779221	0.0038961	0.00519481	3
ILMN_1730019	BRD1	0.0038961	0.0012987	0	3
ILMN_1758918	BRD2	0	0	0	3
ILMN_1785635	BRD3	0.0012987	0	0	3
ILMN_1696420	BRD7	0	0	0	3
ILMN_2082810	BRD7	0	0	0	3
ILMN_3262031	BRD7P2	0.0012987	0	0	3
ILMN_2349600	BRD8	0.0012987	0	0	3
ILMN_1701711	BRD8	0.0012987	0	0	3
ILMN_1651405	BRD9	0	0	0	3
ILMN_2363489	BRE	0.0012987	0	0	3
ILMN_1778684	BRE	0.0012987	0	0	3
ILMN_1665554	BRF2	0.0012987	0	0	3
ILMN_1781580	BRI3	0	0	0	3
ILMN_1797693	BRI3BP	0.00779221	0.0038961	0.0025974	3
ILMN_1803570	BRI3BP	0.0324675	0.00519481	0.00779221	3
ILMN_1693410	BRI3BP	0	0	0	3
ILMN_3253304	BRI3P1	0	0	0	3
ILMN_2155172	BRIX1	0.0012987	0.0012987	0.0025974	3
ILMN_1679800	BRIX1	0	0	0	3
ILMN_2398432	BRMS1	0	0	0	3
ILMN_1775943	BRMS1L	0	0	0	3
ILMN_1727813	BRP44	0	0	0	3
ILMN_1666967	BRP44L	0	0	0	3
ILMN_2226324	BRP44L	0	0	0	3
ILMN_1669308	BRPF1	0.0298701	0.0012987	0.0025974	3
ILMN_2365549	BRPF1	0	0	0	3
ILMN_1658800	BRPF3	0	0	0	3
ILMN_2185845	BRSK1	0	0	0	3
ILMN_1708496	BRSK2	0.0012987	0	0	3
ILMN_2305249	BRUNOL4	0.0025974	0.0038961	0.0025974	3
ILMN_1656045	BRUNOL6	0.00519481	0	0	3
ILMN_1805111	BRWD1	0.00519481	0.0038961	0.0324675	3
ILMN_1673518	BRWD1	0	0	0	3
ILMN_1662896	BRWD2	0.0012987	0	0.0012987	3
ILMN_1774596	BSCL2	0	0	0	3
ILMN_1734483	BSDC1	0	0	0	3
ILMN_1778374	BSG	0	0	0	3
ILMN_1760246	BSN	0	0	0	3
ILMN_1723480	BST2	0	0	0	3
ILMN_1676842	BTAF1	0.0012987	0	0	3
ILMN_2411264	BTBD1	0	0	0	3
ILMN_1691927	BTBD1	0.0025974	0.00519481	0.0038961	3
ILMN_1809344	BTBD10	0	0	0	3
ILMN_1705066	BTBD11	0	0	0	3
ILMN_1732885	BTBD12	0.0012987	0	0	3
ILMN_1707481	BTBD15	0.0012987	0.0012987	0	3
ILMN_1677684	BTBD16	0.0012987	0.0012987	0.0012987	3
ILMN_2286987	BTBD17	0	0	0	3
ILMN_3238274	BTBD2	0	0	0	3
ILMN_1713964	BTBD3	0	0	0	3
ILMN_2334350	BTBD3	0	0	0	3
ILMN_1744725	BTBD6	0	0	0	3
ILMN_1687743	BTBD7	0.00519481	0.00649351	0.00649351	3
ILMN_1757298	BTBD7	0.00519481	0.0012987	0.00519481	3
ILMN_1699728	BTD	0.00519481	0.0038961	0.00519481	3
ILMN_2319414	BTF3	0	0	0	3
ILMN_1659762	BTF3	0	0	0	3
ILMN_2245676	BTF3	0.0025974	0.0012987	0.0025974	3
ILMN_2072140	BTF3L4	0	0	0	3
ILMN_1759359	BTF3L4	0	0	0	3
ILMN_1775743	BTG1	0	0	0	3
ILMN_1770085	BTG2	0	0	0	3
ILMN_1707339	BTG3	0	0	0	3
ILMN_2154836	BTG3	0.0012987	0.0038961	0.0025974	3
ILMN_1662026	BTK	0.0025974	0.0038961	0.0038961	3
ILMN_2364852	BTN2A1	0	0	0	3
ILMN_1802708	BTN3A1	0.00779221	0.0025974	0.00519481	3
ILMN_1676528	BTN3A2	0.00779221	0.0025974	0.00779221	3
ILMN_1815718	BTRC	0.0012987	0	0	3
ILMN_1693145	BUB3	0	0	0	3
ILMN_1778764	BUB3	0	0	0	3
ILMN_2386100	BUB3	0.0012987	0.0012987	0.0025974	3
ILMN_1749210	BUD13	0.0012987	0.0012987	0	3
ILMN_1710697	BUD31	0	0	0	3
ILMN_1689237	BVES	0.0012987	0	0	3
ILMN_1682792	BYSL	0.00779221	0.0012987	0.0038961	3
ILMN_2111229	BZRAP1	0.0025974	0	0	3
ILMN_1676548	BZW2	0.0012987	0	0	3
ILMN_1767556	C10orf10	0.0012987	0	0	3
ILMN_1738955	C10orf104	0.0012987	0.0038961	0.0038961	3
ILMN_3181538	C10orf105	0	0	0	3
ILMN_1770399	C10orf107	0.0038961	0.0038961	0.0025974	3
ILMN_1654413	C10orf108	0.0350649	0.0142857	0.0441558	3
ILMN_1783247	C10orf11	0.0025974	0.0012987	0.00519481	3
ILMN_1799204	C10orf110	0.00909091	0.0220779	0.0246753	3
ILMN_1680110	C10orf116	0	0	0	3
ILMN_1674046	C10orf128	0.0025974	0.0012987	0.0038961	3
ILMN_1791656	C10orf137	0.0025974	0.0025974	0.00519481	3
ILMN_3239861	C10orf140	0.0025974	0.0025974	0.0038961	3
ILMN_2071682	C10orf141	0.0012987	0.0012987	0.0012987	3
ILMN_1701243	C10orf2	0.00519481	0.0012987	0.0025974	3
ILMN_1658830	C10orf26	0.0025974	0.0012987	0.0012987	3
ILMN_2158594	C10orf28	0.0038961	0.0038961	0.0038961	3
ILMN_1723921	C10orf30	0.00909091	0.0103896	0.0233766	3
ILMN_1772706	C10orf32	0.0012987	0	0	3
ILMN_2151056	C10orf32	0	0	0	3
ILMN_1684497	C10orf33	0.0272727	0.0012987	0.0025974	3
ILMN_1662470	C10orf35	0	0	0	3
ILMN_1753490	C10orf39	0	0	0	3
ILMN_2375141	C10orf4	0.0025974	0.0337662	0.00779221	3
ILMN_1765480	C10orf4	0.00779221	0.0454546	0.00649351	3
ILMN_2205963	C10orf54	0.0012987	0	0	3
ILMN_1672717	C10orf57	0.0012987	0	0	3
ILMN_2118472	C10orf58	0	0	0	3
ILMN_1754538	C10orf58	0	0	0	3
ILMN_1718520	C10orf59	0.0012987	0.0038961	0.00519481	3
ILMN_1783873	C10orf59	0.00519481	0.0038961	0.00779221	3
ILMN_1710207	C10orf6	0	0	0	3
ILMN_1678652	C10orf61	0.00519481	0.0181818	0.00519481	3
ILMN_1768077	C10orf61	0.0038961	0.0038961	0.00519481	3
ILMN_1777591	C10orf65	0.0012987	0	0	3
ILMN_3192411	C10orf75	0.0012987	0	0	3
ILMN_3268880	C10orf75	0.0012987	0	0	3
ILMN_1792110	C10orf76	0.0012987	0	0	3
ILMN_1671905	C10orf78	0.0025974	0.0012987	0	3
ILMN_1665207	C10orf85	0.0012987	0	0.0012987	3
ILMN_1775423	C10orf88	0.0012987	0.0012987	0.00519481	3
ILMN_1680367	C10orf90	0.0012987	0	0	3
ILMN_1692568	C10orf92	0.00519481	0.0376623	0.0103896	3
ILMN_2128967	C11orf1	0	0	0	3
ILMN_1786759	C11orf10	0	0	0	3
ILMN_1788356	C11orf17	0.0012987	0	0	3
ILMN_2359029	C11orf17	0.0012987	0	0	3
ILMN_1752988	C11orf17	0	0	0	3
ILMN_2077094	C11orf2	0	0	0	3
ILMN_1808163	C11orf24	0.00909091	0.0012987	0.0012987	3
ILMN_1653836	C11orf41	0.0012987	0	0	3
ILMN_1767642	C11orf46	0.0025974	0.0038961	0.0324675	3
ILMN_1739345	C11orf48	0	0	0	3
ILMN_1664773	C11orf49	0.0415584	0.0038961	0.0142857	3
ILMN_2341487	C11orf49	0.0012987	0.0012987	0	3
ILMN_1726104	C11orf51	0.0012987	0	0	3
ILMN_2213297	C11orf54	0.0012987	0	0	3
ILMN_1664738	C11orf54	0.0012987	0.0012987	0.0038961	3
ILMN_1728965	C11orf57	0.0012987	0	0	3
ILMN_3249949	C11orf58	0	0	0	3
ILMN_3250798	C11orf58	0.00519481	0.012987	0.0155844	3
ILMN_1815878	C11orf59	0	0	0	3
ILMN_1677080	C11orf60	0.0025974	0.0012987	0	3
ILMN_1773148	C11orf61	0.00779221	0.0454546	0.0038961	3
ILMN_2243516	C11orf63	0	0	0	3
ILMN_1680659	C11orf63	0.0233766	0.0298701	0.0155844	3
ILMN_1779163	C11orf67	0	0	0	3
ILMN_1757847	C11orf68	0.0025974	0	0	3
ILMN_2049693	C11orf71	0.00519481	0.00519481	0.0038961	3
ILMN_1781419	C11orf73	0	0	0	3
ILMN_1659017	C11orf74	0	0	0	3
ILMN_1798270	C11orf75	0.0012987	0	0	3
ILMN_1790637	C11orf80	0.0012987	0.0012987	0.0025974	3
ILMN_3240370	C11orf83	0.00519481	0.0025974	0.0025974	3
ILMN_1810376	C11orf87	0.0025974	0.0012987	0.0025974	3
ILMN_1811437	C11orf9	0	0	0	3
ILMN_1777765	C12orf10	0	0	0	3
ILMN_2196337	C12orf11	0.0012987	0.0012987	0.0038961	3
ILMN_1804611	C12orf23	0.0025974	0.0220779	0.00779221	3
ILMN_2180371	C12orf24	0.0012987	0	0	3
ILMN_1745497	C12orf26	0.0025974	0.0181818	0.0155844	3
ILMN_1792671	C12orf29	0.0012987	0	0	3
ILMN_1788810	C12orf30	0.0012987	0	0	3
ILMN_2122176	C12orf31	0.0012987	0.0012987	0.0012987	3
ILMN_2105923	C12orf32	0.0012987	0	0	3
ILMN_1772446	C12orf34	0.0012987	0	0	3
ILMN_2229922	C12orf35	0.0025974	0.0012987	0	3
ILMN_1763311	C12orf39	0.0025974	0.0220779	0.00779221	3
ILMN_1751898	C12orf4	0.0025974	0.0012987	0	3
ILMN_1713189	C12orf41	0	0	0	3
ILMN_1737818	C12orf43	0.0025974	0.0012987	0.0012987	3
ILMN_2169856	C12orf43	0.0025974	0.0012987	0.0025974	3
ILMN_1772527	C12orf44	0.0012987	0	0	3
ILMN_1728435	C12orf45	0.0012987	0.0012987	0	3
ILMN_1798957	C12orf47	0	0	0	3
ILMN_1654429	C12orf48	0.0025974	0.00649351	0.00649351	3
ILMN_2161556	C12orf49	0.0038961	0.00649351	0.0207792	3
ILMN_1791792	C12orf5	0.0025974	0.0012987	0.0038961	3
ILMN_3244516	C12orf51	0	0	0	3
ILMN_1667857	C12orf52	0	0	0	3
ILMN_1706186	C12orf53	0.0402597	0.00519481	0.0025974	3
ILMN_1812191	C12orf57	0	0	0	3
ILMN_1804656	C12orf62	0.0012987	0	0	3
ILMN_1667510	C12orf65	0.0012987	0	0	3
ILMN_3245006	C12orf68	0.0012987	0	0	3
ILMN_2152429	C12orf76	0	0	0	3
ILMN_1753265	C12orf76	0	0	0	3
ILMN_2223350	C13orf1	0.0012987	0	0	3
ILMN_1658494	C13orf15	0	0	0	3
ILMN_1773388	C13orf18	0.00779221	0.0116883	0.0246753	3
ILMN_2196550	C13orf18	0.0116883	0.0220779	0.0298701	3
ILMN_2391551	C13orf23	0.0012987	0.0012987	0.0012987	3
ILMN_1795128	C13orf23	0.0012987	0.0012987	0	3
ILMN_1726054	C13orf26	0.0233766	0.00649351	0.00519481	3
ILMN_1682774	C13orf27	0.0012987	0.0012987	0.00519481	3
ILMN_3243945	C13orf37	0.0012987	0.0038961	0.00519481	3
ILMN_1755882	C13orf7	0.00779221	0.0220779	0.00519481	3
ILMN_1700276	C14orf100	0	0	0	3
ILMN_1740165	C14orf102	0.0025974	0	0	3
ILMN_2374076	C14orf102	0.0012987	0	0	3
ILMN_1769757	C14orf104	0.00519481	0.0233766	0.00779221	3
ILMN_3269775	C14orf109	0.0012987	0.0012987	0.0012987	3
ILMN_3193306	C14orf109	0.0012987	0	0	3
ILMN_1706305	C14orf112	0	0	0	3
ILMN_1777708	C14orf121	0.0116883	0.0025974	0.0025974	3
ILMN_1771629	C14orf124	0.0025974	0.0025974	0	3
ILMN_1712748	C14orf129	0.0012987	0	0	3
ILMN_2181883	C14orf129	0.0012987	0.0038961	0.0038961	3
ILMN_2186858	C14orf131	0.0012987	0	0	3
ILMN_1713744	C14orf132	0	0	0	3
ILMN_1734440	C14orf133	0.0025974	0.0012987	0.0012987	3
ILMN_2111918	C14orf135	0	0	0	3
ILMN_1680781	C14orf135	0	0	0	3
ILMN_1781102	C14orf138	0.0025974	0.0038961	0.0038961	3
ILMN_2394193	C14orf138	0.0012987	0.0012987	0.0025974	3
ILMN_1684357	C14orf139	0.0025974	0.0012987	0.00519481	3
ILMN_1685781	C14orf142	0.0025974	0.0012987	0	3
ILMN_2193315	C14orf143	0.0025974	0.0025974	0.00519481	3
ILMN_1699676	C14orf147	0.0012987	0	0	3
ILMN_2053281	C14orf149	0.0025974	0.0012987	0.00519481	3
ILMN_1667374	C14orf149	0.00779221	0.0467533	0.00649351	3
ILMN_1662895	C14orf153	0.0350649	0.0038961	0.00519481	3
ILMN_2078724	C14orf153	0	0	0	3
ILMN_1661945	C14orf156	0	0	0	3
ILMN_1721106	C14orf159	0	0	0	3
ILMN_1696708	C14orf166	0	0	0	3
ILMN_3261811	C14orf167	0.0012987	0.0012987	0.0025974	3
ILMN_3187771	C14orf167	0.0012987	0	0	3
ILMN_1711543	C14orf169	0.0012987	0	0.0012987	3
ILMN_2393450	C14orf173	0	0	0	3
ILMN_3243606	C14orf174	0.0025974	0.0012987	0	3
ILMN_1756877	C14orf179	0.0012987	0	0	3
ILMN_1652722	C14orf2	0	0	0	3
ILMN_1807031	C14orf28	0.0025974	0.0012987	0.0025974	3
ILMN_1779279	C14orf32	0	0	0	3
ILMN_1796377	C14orf37	0.0025974	0.0012987	0.0012987	3
ILMN_2138745	C14orf37	0.0025974	0.0103896	0.00779221	3
ILMN_1804396	C14orf4	0	0	0	3
ILMN_2412922	C14orf43	0.00519481	0.00779221	0.0025974	3
ILMN_1763091	C14orf43	0	0	0	3
ILMN_1806456	C14orf45	0.0025974	0.0038961	0	3
ILMN_1657111	C14orf78	0	0	0	3
ILMN_1686082	C14orf79	0.00779221	0.0012987	0.0038961	3
ILMN_1653553	C14orf80	0.0025974	0	0	3
ILMN_1690443	C14orf82	0.0012987	0	0	3
ILMN_2134381	C14orf85	0	0	0	3
ILMN_1724897	C14orf93	0.0025974	0.0012987	0.0025974	3
ILMN_1657744	C15orf17	0	0	0	3
ILMN_2141807	C15orf23	0.0025974	0.0142857	0.0155844	3
ILMN_2150000	C15orf24	0	0	0	3
ILMN_1686662	C15orf28	0.0025974	0.0012987	0	3
ILMN_1739854	C15orf29	0.0025974	0.0038961	0.00519481	3
ILMN_2189406	C15orf38	0.0025974	0	0	3
ILMN_1660585	C15orf40	0.0025974	0.00649351	0.0025974	3
ILMN_1700169	C15orf44	0.00779221	0.00649351	0.00519481	3
ILMN_1771326	C15orf44	0.0025974	0.0038961	0.0038961	3
ILMN_2268026	C15orf44	0.00519481	0.0272727	0.0428571	3
ILMN_1795524	C15orf44	0.0038961	0.00519481	0.0025974	3
ILMN_1775330	C15orf52	0	0	0	3
ILMN_2413318	C15orf57	0.0025974	0.0012987	0.0038961	3
ILMN_1811264	C15orf57	0	0	0	3
ILMN_2141118	C15orf59	0	0	0	3
ILMN_1663484	C15orf63	0.0038961	0.0142857	0.0324675	3
ILMN_2073543	C15orf63	0	0	0	3
ILMN_1774990	C16orf13	0.0012987	0	0	3
ILMN_2369826	C16orf13	0.0025974	0.0012987	0	3
ILMN_1801118	C16orf33	0	0	0	3
ILMN_2369580	C16orf35	0	0	0	3
ILMN_1733581	C16orf35	0.00779221	0.0012987	0.0038961	3
ILMN_1713884	C16orf42	0.0025974	0	0	3
ILMN_1687821	C16orf45	0.0012987	0	0	3
ILMN_1787324	C16orf48	0	0	0	3
ILMN_1815812	C16orf5	0.0025974	0.0012987	0	3
ILMN_2194828	C16orf53	0.0012987	0	0	3
ILMN_1727444	C16orf53	0.0012987	0.0012987	0.0012987	3
ILMN_1777129	C16orf56	0.00779221	0	0	3
ILMN_1765880	C16orf57	0.0012987	0	0	3
ILMN_1685289	C16orf58	0	0	0	3
ILMN_1783333	C16orf61	0	0	0	3
ILMN_1729450	C16orf62	0.0025974	0.0038961	0.00519481	3
ILMN_1790650	C16orf63	0	0	0	3
ILMN_1658290	C16orf68	0.0025974	0	0	3
ILMN_1693630	C16orf7	0.0025974	0	0	3
ILMN_1711703	C16orf70	0.00779221	0.0012987	0.00519481	3
ILMN_1773407	C16orf72	0.0012987	0	0	3
ILMN_2112599	C16orf80	0	0	0	3
ILMN_1806657	C16orf85	0.0168831	0.0376623	0.0155844	3
ILMN_1690911	C16orf87	0.0012987	0.0038961	0.0025974	3
ILMN_1676222	C16orf89	0.0025974	0.0103896	0.00649351	3
ILMN_1759325	C16orf91	0.0012987	0	0.0012987	3
ILMN_2179726	C16orf93	0	0	0	3
ILMN_3237452	C17orf100	0.0025974	0.0012987	0.0012987	3
ILMN_3195203	C17orf101	0.00779221	0	0	3
ILMN_1811991	C17orf101	0.0233766	0.0103896	0.00519481	3
ILMN_2388539	C17orf101	0.00779221	0.0012987	0.0012987	3
ILMN_1765923	C17orf101	0.0246753	0.0025974	0.0025974	3
ILMN_3239959	C17orf106	0.0142857	0.00519481	0.038961	3
ILMN_2099487	C17orf108	0.0038961	0.0012987	0.0025974	3
ILMN_1654013	C17orf28	0.0012987	0	0	3
ILMN_1727078	C17orf37	0.00779221	0.0025974	0	3
ILMN_1656427	C17orf39	0.0012987	0.0038961	0.0025974	3
ILMN_3307733	C17orf42	0.0012987	0.0012987	0.0012987	3
ILMN_1719224	C17orf45	0	0	0	3
ILMN_1763688	C17orf49	0.0012987	0	0	3
ILMN_1757693	C17orf51	0.0025974	0.0038961	0.0038961	3
ILMN_2398926	C17orf58	0	0	0	3
ILMN_1700515	C17orf58	0.0012987	0	0.0012987	3
ILMN_1712985	C17orf58	0.0012987	0	0	3
ILMN_2225746	C17orf59	0.0038961	0.0012987	0.0025974	3
ILMN_2201533	C17orf61	0	0	0	3
ILMN_1750401	C17orf62	0.0012987	0	0	3
ILMN_1812441	C17orf63	0.0012987	0	0	3
ILMN_1707292	C17orf67	0.0337662	0.00649351	0.00779221	3
ILMN_1755711	C17orf68	0.0025974	0.0012987	0.0025974	3
ILMN_1702676	C17orf68	0.0116883	0.00519481	0.00779221	3
ILMN_1743621	C17orf69	0.00519481	0.0012987	0.00519481	3
ILMN_1711823	C17orf70	0	0	0	3
ILMN_1807533	C17orf71	0.0012987	0	0	3
ILMN_1752947	C17orf79	0	0	0	3
ILMN_1762071	C17orf80	0.00519481	0.0038961	0.0168831	3
ILMN_1705414	C17orf81	0.048052	0.00519481	0.0142857	3
ILMN_2341690	C17orf81	0.0025974	0.0012987	0	3
ILMN_1672554	C17orf81	0.0012987	0.0012987	0	3
ILMN_2221076	C17orf85	0.0025974	0.0012987	0.0012987	3
ILMN_3263062	C17orf88	0.00909091	0.0012987	0.0038961	3
ILMN_2043615	C17orf90	0	0	0	3
ILMN_1805131	C17orf90	0.0038961	0.0038961	0.0324675	3
ILMN_2390310	C17orf91	0.0025974	0.00649351	0.038961	3
ILMN_2382724	C17orf95	0.0012987	0	0	3
ILMN_3247139	C17orf96	0.00779221	0.0038961	0.0038961	3
ILMN_1713803	C17orf97	0.0025974	0.0012987	0.0025974	3
ILMN_1707137	C17orf97	0	0	0	3
ILMN_2351795	C18orf1	0.0012987	0.0038961	0.00519481	3
ILMN_1671693	C18orf10	0	0	0	3
ILMN_2207328	C18orf10	0	0	0	3
ILMN_1805998	C18orf21	0.0012987	0.0012987	0.0025974	3
ILMN_1736130	C18orf22	0.0194805	0.00649351	0.0025974	3
ILMN_1801822	C18orf25	0	0	0	3
ILMN_2196588	C18orf32	0	0	0	3
ILMN_1670718	C18orf51	0	0	0	3
ILMN_2173500	C18orf51	0	0	0	3
ILMN_1748916	C18orf55	0	0	0	3
ILMN_2182531	C18orf55	0	0	0	3
ILMN_1796074	C18orf56	0	0	0	3
ILMN_1719097	C18orf8	0.0012987	0	0	3
ILMN_1787844	C19orf10	0	0	0	3
ILMN_1703695	C19orf12	0.0025974	0	0	3
ILMN_1664920	C19orf12	0	0	0	3
ILMN_2406892	C19orf2	0	0	0	3
ILMN_1798728	C19orf2	0	0	0	3
ILMN_1808202	C19orf22	0.0012987	0	0	3
ILMN_1678052	C19orf24	0.0038961	0.0012987	0.0012987	3
ILMN_1813374	C19orf28	0.00519481	0.0012987	0	3
ILMN_2262462	C19orf29	0.00779221	0.0025974	0.0025974	3
ILMN_2350421	C19orf29	0.0402597	0.00519481	0.025974	3
ILMN_1730818	C19orf30	0.0012987	0.0012987	0	3
ILMN_2233279	C19orf31	0	0	0	3
ILMN_1734346	C19orf36	0.0402597	0.0012987	0.00519481	3
ILMN_1730945	C19orf4	0.0012987	0	0	3
ILMN_2173891	C19orf40	0.0025974	0.0012987	0.0038961	3
ILMN_1694759	C19orf42	0	0	0	3
ILMN_1784299	C19orf43	0.0012987	0	0	3
ILMN_3251733	C19orf43	0	0	0	3
ILMN_1801697	C19orf46	0.0025974	0.0038961	0.0038961	3
ILMN_1759184	C19orf48	0.0025974	0	0	3
ILMN_1790951	C19orf50	0	0	0	3
ILMN_1726181	C19orf52	0.0025974	0.0012987	0.0025974	3
ILMN_1671374	C19orf53	0	0	0	3
ILMN_1729546	C19orf54	0.00779221	0.0012987	0.0025974	3
ILMN_1757914	C19orf56	0	0	0	3
ILMN_1703288	C19orf6	0.0012987	0	0	3
ILMN_2326282	C19orf6	0.0012987	0	0	3
ILMN_3268564	C19orf60	0.0025974	0	0	3
ILMN_3188110	C19orf60	0	0	0	3
ILMN_1737005	C19orf61	0.00779221	0.0038961	0.0038961	3
ILMN_2396813	C19orf62	0.0012987	0	0	3
ILMN_1806937	C19orf62	0	0	0	3
ILMN_1786707	C19orf63	0.00519481	0.0038961	0.0038961	3
ILMN_3253728	C19orf64	0.0168831	0.00779221	0.0311688	3
ILMN_1750400	C19orf66	0.0012987	0.0012987	0	3
ILMN_1765684	C19orf70	0	0	0	3
ILMN_1662578	C1GALT1	0.0025974	0.0012987	0.00519481	3
ILMN_2401730	C1GALT1C1	0.0025974	0.00779221	0.0285714	3
ILMN_1751234	C1GALT1C1	0	0	0	3
ILMN_1658206	C1orf102	0.0038961	0.00649351	0.00649351	3
ILMN_2089656	C1orf107	0.0025974	0.0025974	0.0012987	3
ILMN_2077886	C1orf109	0.0025974	0.0012987	0.0012987	3
ILMN_1674817	C1orf115	0.0012987	0.0012987	0	3
ILMN_1786273	C1orf122	0	0	0	3
ILMN_2082130	C1orf123	0	0	0	3
ILMN_1655485	C1orf124	0.0025974	0.0025974	0.00779221	3
ILMN_1784207	C1orf128	0	0	0	3
ILMN_1805474	C1orf131	0.0012987	0	0	3
ILMN_3241665	C1orf133	0.0012987	0	0	3
ILMN_1707503	C1orf144	0	0	0	3
ILMN_2076940	C1orf149	0.0012987	0	0	3
ILMN_1657860	C1orf151	0.0038961	0.00649351	0.0038961	3
ILMN_1734915	C1orf156	0.00519481	0.0207792	0.0324675	3
ILMN_1754894	C1orf162	0	0	0	3
ILMN_1757415	C1orf163	0.00909091	0.0038961	0.0038961	3
ILMN_1675024	C1orf165	0.0025974	0.00519481	0.0246753	3
ILMN_1675055	C1orf166	0.0025974	0	0	3
ILMN_1751569	C1orf173	0.0025974	0.00779221	0.0233766	3
ILMN_3236244	C1orf174	0.0012987	0	0	3
ILMN_1734486	C1orf19	0	0	0	3
ILMN_1742738	C1orf190	0.0025974	0	0.0012987	3
ILMN_1691299	C1orf192	0.00909091	0.0012987	0.0272727	3
ILMN_3251643	C1orf194	0.00779221	0.0012987	0.0025974	3
ILMN_1657683	C1orf198	0	0	0	3
ILMN_1703119	C1orf200	0.0337662	0.0038961	0.00649351	3
ILMN_3256801	C1orf203	0.00779221	0.0038961	0.00649351	3
ILMN_1797735	C1orf21	0.0012987	0	0	3
ILMN_1693226	C1orf212	0.0012987	0.0441558	0.0025974	3
ILMN_1659975	C1orf216	0	0	0	3
ILMN_1789436	C1orf218	0.0012987	0	0	3
ILMN_1667966	C1orf24	0.0012987	0	0	3
ILMN_1665300	C1orf25	0.0025974	0.0038961	0.00519481	3
ILMN_1681741	C1orf31	0.00519481	0.0116883	0.0207792	3
ILMN_1790202	C1orf35	0.0025974	0	0	3
ILMN_1681340	C1orf41	0.0012987	0.0012987	0	3
ILMN_1729509	C1orf43	0	0	0	3
ILMN_1660602	C1orf43	0.0012987	0.0012987	0.0025974	3
ILMN_1801941	C1orf50	0	0	0	3
ILMN_1742611	C1orf52	0	0	0	3
ILMN_1661595	C1orf53	0.0168831	0.00519481	0.00779221	3
ILMN_1702231	C1orf54	0	0	0	3
ILMN_1748291	C1orf55	0.0012987	0	0	3
ILMN_1657446	C1orf57	0	0	0	3
ILMN_1682428	C1orf59	0	0	0	3
ILMN_1759652	C1orf61	0	0	0	3
ILMN_1749915	C1orf63	0	0	0	3
ILMN_1760556	C1orf63	0.0012987	0.0012987	0.0012987	3
ILMN_2066088	C1orf64	0.0012987	0	0	3
ILMN_1706413	C1orf66	0.0025974	0	0	3
ILMN_1670263	C1orf71	0	0	0	3
ILMN_1786470	C1orf74	0.0025974	0.0012987	0.00649351	3
ILMN_1736234	C1orf77	0	0	0	3
ILMN_1673544	C1orf83	0.0038961	0.0012987	0.0012987	3
ILMN_1698243	C1orf85	0	0	0	3
ILMN_2097790	C1orf86	0.0025974	0	0	3
ILMN_1726989	C1orf86	0.0012987	0	0	3
ILMN_2097943	C1orf87	0.0272727	0.0103896	0.00779221	3
ILMN_1761278	C1orf88	0.00519481	0.038961	0.0233766	3
ILMN_2064237	C1orf88	0.0220779	0.0038961	0.00649351	3
ILMN_1673752	C1orf91	0.00519481	0.0311688	0.00519481	3
ILMN_3243682	C1orf93	0.0012987	0	0	3
ILMN_1699217	C1orf96	0.0025974	0.0025974	0.0428571	3
ILMN_2047354	C1orf97	0.0025974	0.0194805	0.0103896	3
ILMN_1808769	C1orf97	0.0012987	0	0	3
ILMN_1737918	C1QA	0.0012987	0	0	3
ILMN_1796409	C1QB	0	0	0	3
ILMN_1668996	C1QBP	0	0	0	3
ILMN_1785902	C1QC	0	0	0	3
ILMN_1716957	C1QL1	0.00779221	0	0	3
ILMN_1756236	C1QL2	0.00779221	0.0025974	0.0038961	3
ILMN_2380237	C1QTNF1	0.0012987	0	0	3
ILMN_2195462	C1QTNF4	0.00519481	0	0	3
ILMN_1744487	C1QTNF5	0.0012987	0	0	3
ILMN_1733288	C1RL	0.0220779	0.00779221	0.00649351	3
ILMN_1781626	C1S	0.0012987	0	0	3
ILMN_1710740	C2	0.00779221	0.00519481	0.038961	3
ILMN_2082209	C20orf100	0	0	0	3
ILMN_1713561	C20orf103	0.0012987	0	0	3
ILMN_1708016	C20orf108	0	0	0	3
ILMN_1755909	C20orf11	0	0	0	3
ILMN_2049727	C20orf111	0	0	0	3
ILMN_1693004	C20orf117	0	0	0	3
ILMN_1662640	C20orf127	0	0	0	3
ILMN_1748206	C20orf160	0.0025974	0	0	3
ILMN_1718712	C20orf177	0	0	0	3
ILMN_2044027	C20orf191	0.0025974	0.0012987	0	3
ILMN_1689585	C20orf194	0.0012987	0	0	3
ILMN_1793002	C20orf196	0.00779221	0.00519481	0.038961	3
ILMN_3188984	C20orf199	0	0	0	3
ILMN_1790136	C20orf20	0	0	0	3
ILMN_2387599	C20orf24	0	0	0	3
ILMN_1679195	C20orf24	0	0	0	3
ILMN_2283388	C20orf24	0	0	0	3
ILMN_1697363	C20orf27	0	0	0	3
ILMN_1785644	C20orf29	0.0025974	0	0	3
ILMN_1674394	C20orf3	0	0	0	3
ILMN_2404539	C20orf30	0	0	0	3
ILMN_1806312	C20orf30	0	0	0	3
ILMN_1721225	C20orf4	0.0012987	0	0	3
ILMN_1771815	C20orf43	0	0	0	3
ILMN_1728168	C20orf45	0.0012987	0	0	3
ILMN_1751228	C20orf46	0.0012987	0	0	3
ILMN_1801633	C20orf52	0	0	0	3
ILMN_1740923	C20orf54	0.00779221	0.0025974	0.0025974	3
ILMN_1782095	C20orf55	0.0025974	0.0012987	0	3
ILMN_3196687	C20orf56	0.00779221	0.0194805	0.00519481	3
ILMN_1813344	C20orf7	0	0	0	3
ILMN_2350607	C20orf7	0.0012987	0.0012987	0.0012987	3
ILMN_2176251	C20orf72	0.0025974	0.0012987	0	3
ILMN_1728403	C21orf119	0.0025974	0.0038961	0.00519481	3
ILMN_1764503	C21orf124	0.038961	0.0441558	0.0246753	3
ILMN_3177348	C21orf126	0.00779221	0.0038961	0.0246753	3
ILMN_1663893	C21orf128	0.0025974	0.0012987	0.0038961	3
ILMN_3243121	C21orf130	0	0	0	3
ILMN_3235163	C21orf131	0.0025974	0.0233766	0.00649351	3
ILMN_1758806	C21orf2	0	0	0	3
ILMN_2211724	C21orf24	0	0	0	3
ILMN_1682812	C21orf33	0.0012987	0	0	3
ILMN_1737588	C21orf33	0	0	0	3
ILMN_2386205	C21orf33	0.0012987	0	0	3
ILMN_1690703	C21orf34	0	0	0	3
ILMN_1675632	C21orf37	0.0012987	0	0	3
ILMN_1712386	C21orf45	0.0025974	0.0038961	0.0350649	3
ILMN_2171183	C21orf45	0.0246753	0.0038961	0.0363636	3
ILMN_2356311	C21orf51	0.0012987	0	0	3
ILMN_2266005	C21orf51	0.0025974	0.0012987	0.0025974	3
ILMN_1777221	C21orf51	0	0	0	3
ILMN_1814204	C21orf55	0	0	0	3
ILMN_2411127	C21orf57	0.0025974	0.0012987	0.0025974	3
ILMN_1656297	C21orf57	0.0012987	0	0	3
ILMN_1795836	C21orf57	0.0012987	0	0	3
ILMN_2310296	C21orf58	0.0142857	0.048052	0.00779221	3
ILMN_3307877	C21orf58	0	0	0	3
ILMN_1764329	C21orf59	0.0038961	0.0220779	0.0428571	3
ILMN_1776147	C21orf59	0.0012987	0	0	3
ILMN_1695959	C21orf63	0.0012987	0	0	3
ILMN_2251978	C21orf66	0	0	0	3
ILMN_1699071	C21orf7	0.0025974	0.0012987	0	3
ILMN_2104924	C21orf70	0.00779221	0.0012987	0.0012987	3
ILMN_3246107	C21orf71	0.0025974	0.0038961	0.00519481	3
ILMN_2110496	C21orf91	0.0311688	0.0207792	0.00779221	3
ILMN_1764410	C22orf13	0	0	0	3
ILMN_1789405	C22orf25	0.0012987	0	0	3
ILMN_3196690	C22orf27	0.0025974	0.00649351	0.00519481	3
ILMN_1795991	C22orf28	0	0	0	3
ILMN_1759595	C22orf29	0.0025974	0.0012987	0.0012987	3
ILMN_3307887	C22orf30	0	0	0	3
ILMN_1706859	C22orf32	0.0012987	0	0	3
ILMN_1737255	C22orf36	0.0324675	0.0012987	0.0025974	3
ILMN_1804884	C22orf39	0.0025974	0	0	3
ILMN_2325112	C22orf40	0.00909091	0.0142857	0.0038961	3
ILMN_1759195	C22orf9	0.0272727	0.00649351	0.00519481	3
ILMN_1757347	C22orf9	0.0012987	0	0	3
ILMN_2384513	C2CD2	0.0025974	0.0025974	0.0038961	3
ILMN_1652512	C2CD2	0	0	0	3
ILMN_3248551	C2CD4B	0.0350649	0.00649351	0.00649351	3
ILMN_1732404	C2orf15	0.0337662	0.012987	0.00519481	3
ILMN_1812688	C2orf18	0.0025974	0.0012987	0.0012987	3
ILMN_2073520	C2orf21	0.025974	0.0207792	0.0246753	3
ILMN_1795419	C2orf24	0.0012987	0	0	3
ILMN_1810759	C2orf25	0	0	0	3
ILMN_2090558	C2orf25	0	0	0	3
ILMN_1774584	C2orf28	0	0	0	3
ILMN_2386016	C2orf28	0	0	0	3
ILMN_1708906	C2orf29	0	0	0	3
ILMN_1724376	C2orf30	0	0	0	3
ILMN_2182148	C2orf32	0.0012987	0	0	3
ILMN_1738099	C2orf34	0.0012987	0	0	3
ILMN_1676822	C2orf40	0.0012987	0	0	3
ILMN_1661594	C2orf42	0	0	0	3
ILMN_1730631	C2orf44	0.0012987	0	0	3
ILMN_1795007	C2orf47	0.0012987	0	0	3
ILMN_1701131	C2orf49	0.00779221	0.0038961	0.00519481	3
ILMN_3243366	C2orf55	0.0025974	0.0012987	0	3
ILMN_1722186	C2orf56	0.0012987	0.0012987	0.0025974	3
ILMN_1805148	C2orf63	0.0038961	0.00519481	0.0246753	3
ILMN_1683065	C2orf64	0	0	0	3
ILMN_3247681	C2orf68	0.0038961	0.0012987	0.00519481	3
ILMN_3236377	C2orf69	0	0	0	3
ILMN_2229940	C2orf7	0.0012987	0	0	3
ILMN_1726729	C2orf76	0.0012987	0.0012987	0.0025974	3
ILMN_1692707	C2orf79	0.0012987	0.0012987	0	3
ILMN_3240957	C2orf80	0	0	0	3
ILMN_1774265	C2orf82	0	0	0	3
ILMN_1762260	C3	0.0025974	0.0012987	0.0012987	3
ILMN_1787529	C3AR1	0.0012987	0.0012987	0.00779221	3
ILMN_2193175	C3orf1	0.0012987	0.0012987	0.0038961	3
ILMN_1764500	C3orf10	0	0	0	3
ILMN_1761882	C3orf14	0.0038961	0.00649351	0.00779221	3
ILMN_2224486	C3orf14	0	0	0	3
ILMN_2331658	C3orf17	0.0012987	0	0.0038961	3
ILMN_1728581	C3orf18	0.0025974	0	0	3
ILMN_1750144	C3orf19	0.0012987	0	0	3
ILMN_1671116	C3orf21	0.0025974	0	0	3
ILMN_1754423	C3orf23	0.0025974	0.0038961	0.0012987	3
ILMN_1705753	C3orf26	0.0012987	0	0	3
ILMN_2215545	C3orf26	0	0	0	3
ILMN_1793724	C3orf31	0.0012987	0.0012987	0.0025974	3
ILMN_1665217	C3orf34	0.00519481	0.0038961	0.0103896	3
ILMN_2288483	C3orf34	0	0	0	3
ILMN_1815682	C3orf37	0.0012987	0	0	3
ILMN_1696597	C3orf37	0	0	0	3
ILMN_1697742	C3orf38	0.0025974	0.00649351	0.00519481	3
ILMN_2078264	C3orf38	0.0012987	0.0012987	0.0012987	3
ILMN_1792415	C3orf39	0	0	0	3
ILMN_3238618	C3orf50	0.0012987	0	0	3
ILMN_1690454	C3orf54	0.0025974	0.0012987	0	3
ILMN_1797372	C3orf58	0.0012987	0.0012987	0.0012987	3
ILMN_1700967	C3orf59	0.0012987	0.0025974	0.0038961	3
ILMN_1691557	C3orf60	0.025974	0.0038961	0.0038961	3
ILMN_1661409	C3orf63	0.0025974	0.0038961	0.00519481	3
ILMN_1660519	C3orf70	0	0	0	3
ILMN_2135339	C3orf70	0	0	0	3
ILMN_3241169	C3orf75	0	0	0	3
ILMN_1708382	C3orf75	0	0	0	3
ILMN_1724990	C3orf75	0.0025974	0.0012987	0	3
ILMN_3247844	C4orf10	0.0350649	0.0038961	0.0038961	3
ILMN_1665066	C4orf14	0.0012987	0	0	3
ILMN_1672124	C4orf18	0	0	0	3
ILMN_1761941	C4orf18	0	0	0	3
ILMN_1798129	C4orf23	0.00519481	0.00649351	0.0168831	3
ILMN_1698677	C4orf27	0	0	0	3
ILMN_1689176	C4orf31	0.00519481	0.00649351	0.00779221	3
ILMN_1700257	C4orf32	0.0025974	0.0311688	0.00519481	3
ILMN_1812701	C4orf33	0.0012987	0.0038961	0.00519481	3
ILMN_2224907	C4orf34	0	0	0	3
ILMN_1713892	C4orf34	0	0	0	3
ILMN_2338921	C4orf41	0	0	0	3
ILMN_1752086	C4orf41	0.0012987	0	0	3
ILMN_3239531	C4orf48	0.0012987	0	0	3
ILMN_1746819	C5	0.0012987	0.0012987	0	3
ILMN_1689836	C5AR1	0.00779221	0.0220779	0.00519481	3
ILMN_1680738	C5orf13	0	0	0	3
ILMN_1695917	C5orf15	0	0	0	3
ILMN_1654542	C5orf21	0	0	0	3
ILMN_1796595	C5orf22	0.0025974	0.0038961	0.00779221	3
ILMN_1743939	C5orf24	0.0012987	0.0181818	0	3
ILMN_1763326	C5orf25	0.00519481	0.00649351	0.00519481	3
ILMN_3253599	C5orf27	0.0116883	0.0012987	0.0324675	3
ILMN_2150465	C5orf28	0	0	0	3
ILMN_1677292	C5orf30	0.0012987	0.0012987	0.0012987	3
ILMN_1761566	C5orf32	0	0	0	3
ILMN_1698770	C5orf33	0.0012987	0.0012987	0.0025974	3
ILMN_1757636	C5orf35	0.0012987	0.0012987	0.0012987	3
ILMN_2225577	C5orf37	0.0012987	0.0012987	0	3
ILMN_2098616	C5orf39	0.00519481	0.0142857	0.0038961	3
ILMN_1728742	C5orf4	0	0	0	3
ILMN_1776788	C5orf41	0.0025974	0	0	3
ILMN_2195821	C5orf41	0.0012987	0	0	3
ILMN_1677303	C5orf42	0.0402597	0.0363636	0.0038961	3
ILMN_1658439	C5orf44	0.0337662	0.012987	0.00649351	3
ILMN_1726930	C5orf44	0.0012987	0	0	3
ILMN_1673478	C5orf5	0	0	0	3
ILMN_3237850	C5orf51	0	0	0	3
ILMN_1783023	C5orf51	0	0	0	3
ILMN_1685854	C5orf53	0	0	0	3
ILMN_1727553	C5orf54	0.0012987	0.0038961	0.00519481	3
ILMN_1684368	C5orf62	0.0272727	0.0038961	0.0025974	3
ILMN_2370685	C6orf1	0.0012987	0	0	3
ILMN_1704253	C6orf106	0.0012987	0	0	3
ILMN_2380588	C6orf108	0	0	0	3
ILMN_2161357	C6orf111	0.0012987	0.0012987	0.0012987	3
ILMN_1720858	C6orf115	0.0012987	0	0	3
ILMN_1794829	C6orf117	0	0	0	3
ILMN_1790461	C6orf125	0	0	0	3
ILMN_1651987	C6orf129	0.0012987	0	0	3
ILMN_1804834	C6orf130	0	0	0	3
ILMN_1752476	C6orf134	0.0025974	0	0	3
ILMN_1813236	C6orf136	0	0	0	3
ILMN_1709026	C6orf145	0.00779221	0.0220779	0.00779221	3
ILMN_1815039	C6orf153	0	0	0	3
ILMN_1653794	C6orf160	0	0	0	3
ILMN_2413141	C6orf162	0.0025974	0.0038961	0.00519481	3
ILMN_1693323	C6orf162	0.0025974	0.0012987	0.0324675	3
ILMN_1715096	C6orf168	0.0025974	0.0012987	0.0025974	3
ILMN_2228196	C6orf170	0	0	0	3
ILMN_1669831	C6orf192	0	0	0	3
ILMN_1778951	C6orf203	0.0025974	0.0012987	0.0025974	3
ILMN_1798108	C6orf211	0.0025974	0.0038961	0.00519481	3
ILMN_1686889	C6orf225	0.0025974	0.0012987	0.0012987	3
ILMN_3248941	C6orf225	0.0025974	0	0	3
ILMN_1709799	C6orf25	0.00519481	0.0038961	0.0038961	3
ILMN_1712836	C6orf27	0.00779221	0.0012987	0.0038961	3
ILMN_1795286	C6orf47	0	0	0	3
ILMN_1766446	C6orf48	0.0012987	0	0	3
ILMN_2391765	C6orf48	0	0	0	3
ILMN_1722945	C6orf52	0.0025974	0.0038961	0.00649351	3
ILMN_1728057	C6orf57	0.00779221	0.0025974	0.00779221	3
ILMN_1655572	C6orf59	0.0012987	0	0	3
ILMN_3241996	C6orf59	0.0012987	0	0	3
ILMN_1680867	C6orf61	0.0025974	0.0012987	0.0025974	3
ILMN_1653797	C6orf62	0	0	0	3
ILMN_1716728	C6orf64	0.0012987	0.0012987	0	3
ILMN_1659524	C6orf66	0.0012987	0	0	3
ILMN_2205350	C6orf66	0.0025974	0.0012987	0.00519481	3
ILMN_1657064	C6orf70	0.0025974	0	0	3
ILMN_1705116	C6orf85	0	0	0	3
ILMN_1665117	C6orf89	0.0038961	0.0038961	0.0168831	3
ILMN_1745119	C7orf11	0.0025974	0.0012987	0	3
ILMN_1701724	C7orf20	0.00519481	0.0012987	0	3
ILMN_1800632	C7orf20	0.0246753	0.0246753	0.0246753	3
ILMN_1751143	C7orf23	0.0012987	0	0	3
ILMN_1751051	C7orf25	0.0012987	0	0	3
ILMN_1730048	C7orf26	0.0012987	0	0	3
ILMN_1804498	C7orf27	0	0	0	3
ILMN_2259292	C7orf28A	0.0246753	0.0337662	0.00649351	3
ILMN_1660270	C7orf28A	0.0012987	0	0	3
ILMN_1708604	C7orf28A	0.0012987	0	0	3
ILMN_2246083	C7orf28B	0	0	0	3
ILMN_1713322	C7orf28B	0.0012987	0	0	3
ILMN_1739798	C7orf30	0	0	0	3
ILMN_1793508	C7orf36	0.0012987	0.0038961	0.0025974	3
ILMN_3235912	C7orf38	0.0012987	0	0	3
ILMN_3248773	C7orf40	0.0012987	0	0	3
ILMN_1672605	C7orf41	0	0	0	3
ILMN_1729130	C7orf42	0.0025974	0.0038961	0.0038961	3
ILMN_1770030	C7orf43	0.0025974	0	0	3
ILMN_2081335	C7orf44	0	0	0	3
ILMN_1741475	C7orf47	0.0025974	0.0012987	0	3
ILMN_1740903	C7orf49	0.00519481	0.0012987	0.0025974	3
ILMN_1718336	C7orf50	0	0	0	3
ILMN_1655961	C7orf54	0.00779221	0.00519481	0.0246753	3
ILMN_1779751	C7orf55	0.0012987	0	0	3
ILMN_3238680	C7orf55	0	0	0	3
ILMN_1779735	C7orf59	0	0	0	3
ILMN_1659990	C7orf68	0	0	0	3
ILMN_1717219	C7orf70	0	0	0	3
ILMN_1687213	C8orf13	0	0	0	3
ILMN_2098325	C8orf33	0	0	0	3
ILMN_1706275	C8orf33	0	0	0	3
ILMN_2091084	C8orf37	0	0	0	3
ILMN_1727618	C8orf38	0.0012987	0.0038961	0.0025974	3
ILMN_1677385	C8orf40	0	0	0	3
ILMN_1760400	C8orf41	0.0012987	0	0	3
ILMN_2113738	C8orf45	0	0	0	3
ILMN_1657149	C8orf46	0	0	0	3
ILMN_1784408	C8orf48	0.0025974	0.0012987	0.0246753	3
ILMN_1777740	C8orf55	0	0	0	3
ILMN_1653205	C8orf59	0	0	0	3
ILMN_1742074	C8orf76	0	0	0	3
ILMN_3243899	C8orf83	0.0012987	0.0012987	0.0038961	3
ILMN_1791306	C9orf103	0	0	0	3
ILMN_1695485	C9orf109	0.00779221	0.0415584	0.00649351	3
ILMN_1750969	C9orf10OS	0.0012987	0	0	3
ILMN_1803317	C9orf114	0	0	0	3
ILMN_1723709	C9orf116	0.0025974	0	0	3
ILMN_2329569	C9orf116	0.0025974	0.0012987	0	3
ILMN_1811555	C9orf119	0.0012987	0	0	3
ILMN_1769409	C9orf123	0.0012987	0	0	3
ILMN_1809323	C9orf125	0.0025974	0.0012987	0	3
ILMN_1708029	C9orf127	0.0012987	0	0	3
ILMN_1738678	C9orf130	0	0	0	3
ILMN_1702197	C9orf140	0.00519481	0.0012987	0	3
ILMN_1761138	C9orf142	0	0	0	3
ILMN_1700028	C9orf156	0.0012987	0	0	3
ILMN_1782618	C9orf16	0.0025974	0.0012987	0	3
ILMN_1733221	C9orf164	0	0	0	3
ILMN_1814106	C9orf169	0.0337662	0.0038961	0.00519481	3
ILMN_1717229	C9orf21	0.0025974	0.00519481	0.0038961	3
ILMN_1683175	C9orf23	0.0012987	0	0	3
ILMN_2365023	C9orf24	0	0	0	3
ILMN_1763695	C9orf24	0.0012987	0	0	3
ILMN_1746633	C9orf25	0	0	0	3
ILMN_1674629	C9orf3	0.00519481	0.0012987	0.00519481	3
ILMN_1714278	C9orf30	0.0012987	0	0	3
ILMN_1799320	C9orf37	0.0012987	0	0.0012987	3
ILMN_1711799	C9orf40	0.0025974	0.0012987	0.0025974	3
ILMN_1719998	C9orf45	0.0012987	0	0	3
ILMN_1709043	C9orf46	0.0012987	0	0	3
ILMN_1788384	C9orf5	0	0	0	3
ILMN_1701873	C9orf50	0.00779221	0.0025974	0.0025974	3
ILMN_2323508	C9orf58	0	0	0	3
ILMN_2191929	C9orf6	0.0012987	0	0	3
ILMN_1685104	C9orf6	0.0012987	0.0012987	0	3
ILMN_2179717	C9orf61	0.0012987	0	0	3
ILMN_1815635	C9orf62	0.00519481	0.0012987	0.00519481	3
ILMN_1777318	C9orf64	0.0012987	0	0	3
ILMN_3244065	C9orf69	0.0012987	0	0	3
ILMN_1814856	C9orf7	0.0025974	0.0012987	0	3
ILMN_1762508	C9orf72	0.0025974	0.0012987	0.0025974	3
ILMN_1741881	C9orf72	0.0012987	0.0012987	0	3
ILMN_1664283	C9orf75	0.0012987	0	0	3
ILMN_1697166	C9orf78	0	0	0	3
ILMN_1688621	C9orf80	0.0012987	0	0	3
ILMN_2079098	C9orf80	0	0	0	3
ILMN_1760628	C9orf86	0.0025974	0	0	3
ILMN_1659189	C9orf89	0.0012987	0	0	3
ILMN_1813837	C9orf9	0.0012987	0	0	3
ILMN_1714148	C9orf90	0.0025974	0.0012987	0	3
ILMN_1803652	C9orf91	0.0025974	0.0012987	0.0012987	3
ILMN_1674650	C9orf95	0.0012987	0.0012987	0	3
ILMN_1665856	CA10	0	0	0	3
ILMN_1743219	CA11	0.0012987	0	0	3
ILMN_1720998	CA12	0.0012987	0	0	3
ILMN_1802414	CA13	0.0025974	0.0454546	0.0038961	3
ILMN_1742358	CA14	0.0012987	0	0	3
ILMN_1662795	CA2	0	0	0	3
ILMN_2199439	CA2	0	0	0	3
ILMN_1695157	CA4	0	0	0	3
ILMN_1672807	CA5B	0.0025974	0.0012987	0.0012987	3
ILMN_1765858	CAB39	0	0	0	3
ILMN_1783598	CAB39L	0.0025974	0	0	3
ILMN_1731064	CABC1	0	0	0	3
ILMN_1814044	CABIN1	0.00519481	0.0012987	0.0012987	3
ILMN_1653001	CABLES1	0.0012987	0	0	3
ILMN_1762407	CABLES2	0.0311688	0.00649351	0.00779221	3
ILMN_1677746	CABP1	0.0402597	0.025974	0.0428571	3
ILMN_1754078	CABP7	0.0012987	0	0	3
ILMN_2412139	CABYR	0.0025974	0.0012987	0.0025974	3
ILMN_1738854	CACHD1	0.0012987	0.0012987	0.0012987	3
ILMN_1761851	CACNA1A	0.0402597	0.0207792	0.00519481	3
ILMN_1666775	CACNA1C	0.00779221	0.00779221	0.0025974	3
ILMN_1664047	CACNA1E	0.0012987	0.0012987	0.0025974	3
ILMN_1703016	CACNA1G	0.0025974	0.0012987	0	3
ILMN_1671263	CACNA1H	0.0012987	0.0012987	0	3
ILMN_2300664	CACNA1I	0.0012987	0	0	3
ILMN_1711049	CACNA2D2	0.0012987	0	0	3
ILMN_1754076	CACNA2D3	0.0012987	0.0012987	0.0038961	3
ILMN_2406106	CACNB2	0.0025974	0.0025974	0.0038961	3
ILMN_2195482	CACNB3	0	0	0	3
ILMN_1769492	CACNG2	0.0402597	0.0012987	0.0038961	3
ILMN_1768758	CACNG3	0.0025974	0	0	3
ILMN_1669816	CACNG7	0.0168831	0.0181818	0.0025974	3
ILMN_1726574	CACYBP	0	0	0	3
ILMN_1691340	CACYBP	0.00779221	0	0	3
ILMN_1810992	CAD	0.025974	0.0038961	0.00519481	3
ILMN_1680132	CADM1	0	0	0	3
ILMN_1664679	CADM2	0	0	0	3
ILMN_1701827	CADM3	0.0012987	0	0	3
ILMN_1812096	CADM4	0	0	0	3
ILMN_1665547	CADPS	0	0	0	3
ILMN_1688188	CADPS	0.0025974	0.0025974	0.0012987	3
ILMN_1684461	CADPS2	0	0	0	3
ILMN_1748840	CALB2	0	0	0	3
ILMN_1774427	CALCOCO1	0.00519481	0.0012987	0	3
ILMN_1755504	CALCOCO2	0.0025974	0.0012987	0.0025974	3
ILMN_1730487	CALD1	0	0	0	3
ILMN_2324002	CALD1	0.00519481	0.0012987	0.0025974	3
ILMN_1717990	CALD1	0.00779221	0.0207792	0.0025974	3
ILMN_1766200	CALHM2	0.0025974	0.0038961	0.00779221	3
ILMN_1778242	CALM1	0	0	0	3
ILMN_1687858	CALM2	0	0	0	3
ILMN_1666385	CALM3	0	0	0	3
ILMN_1815707	CALML4	0.025974	0.0012987	0.0025974	3
ILMN_1778121	CALN1	0.0012987	0	0	3
ILMN_1736256	CALR	0	0	0	3
ILMN_1727194	CALU	0.0012987	0	0	3
ILMN_3238986	CALY	0	0	0	3
ILMN_2140990	CAMK1	0.00519481	0	0	3
[truncated: 45,232 more rows]

## Sheet: heNSC
PROBE_ID	SYMBOL	BG03 NSC_1.Detection Pval	BG03 NSC_2.Detection Pval	BG03 NSC_3.Detection Pval
ILMN_1745607	A2M	0	0	0	3
ILMN_2061446	AADACL1	0	0	0	3
ILMN_1676336	AADACL1	0	0	0	3
ILMN_1726986	AADAT	0	0	0	3
ILMN_3237396	AAGAB	0	0	0	3
ILMN_1653165	AAMP	0	0	0	3
ILMN_1662364	AARS	0	0	0	3
ILMN_1674698	AARS2	0	0	0	3
ILMN_1700461	AARSD1	0	0	0	3
ILMN_1784269	AASDH	0.0142857	0.0038961	0	3
ILMN_1698189	AASDHPPT	0	0	0	3
ILMN_2096191	AASDHPPT	0	0	0	3
ILMN_1678323	AASS	0.0142857	0.0272727	0.0012987	3
ILMN_1703743	AATF	0	0	0	3
ILMN_1805104	ABAT	0	0	0	3
ILMN_2404407	ABAT	0	0	0	3
ILMN_1766054	ABCA1	0	0	0	3
ILMN_1758523	ABCA3	0	0	0	3
ILMN_1796801	ABCA8	0.00519481	0.00649351	0.00519481	3
ILMN_1665730	ABCB10	0	0	0	3
ILMN_2193980	ABCB6	0	0	0	3
ILMN_1687840	ABCB7	0	0	0	3
ILMN_2343047	ABCB9	0.0012987	0.0025974	0.00909091	3
ILMN_2343048	ABCB9	0	0	0	3
ILMN_1776119	ABCC10	0.0025974	0.0168831	0.0467533	3
ILMN_1677814	ABCC3	0	0	0	3
ILMN_1788457	ABCC4	0.0025974	0.0038961	0.0012987	3
ILMN_1706531	ABCC5	0.0012987	0.0025974	0.0012987	3
ILMN_1651964	ABCC5	0.0025974	0	0	3
ILMN_1674032	ABCD3	0	0	0	3
ILMN_1651501	ABCD4	0	0.0168831	0.0220779	3
ILMN_2330267	ABCE1	0	0	0	3
ILMN_1676846	ABCE1	0	0	0	3
ILMN_2392635	ABCF1	0	0	0	3
ILMN_1763875	ABCF1	0	0	0	3
ILMN_1781999	ABCF2	0	0	0	3
ILMN_1669201	ABCF2	0	0	0	3
ILMN_1810085	ABCF3	0.00519481	0.00649351	0.00519481	3
ILMN_1658176	ABCG1	0.0025974	0	0	3
ILMN_1770031	ABHD10	0	0	0	3
ILMN_1745116	ABHD12	0	0.0012987	0	3
ILMN_2318685	ABHD12	0	0	0	3
ILMN_2245305	ABHD12	0	0	0	3
ILMN_1794213	ABHD14A	0	0	0	3
ILMN_1769390	ABHD15	0.0142857	0.0220779	0.0181818	3
ILMN_1723662	ABHD2	0.0012987	0.00519481	0	3
ILMN_1801767	ABHD3	0	0	0	3
ILMN_1700633	ABHD4	0	0	0	3
ILMN_1655702	ABHD5	0.0012987	0	0	3
ILMN_1706344	ABHD6	0	0	0	3
ILMN_1719498	ABHD7	0	0	0	3
ILMN_1712707	ABHD8	0	0	0	3
ILMN_2329958	ABI1	0	0	0	3
ILMN_1724497	ABI2	0	0	0	3
ILMN_1713732	ABL1	0	0	0	3
ILMN_1785424	ABLIM1	0	0	0	3
ILMN_2396672	ABLIM1	0	0	0	3
ILMN_1672878	ABR	0	0	0	3
ILMN_1658083	ABT1	0.00649351	0.00519481	0	3
ILMN_1753370	ABTB2	0	0.0025974	0	3
ILMN_1738921	ACAA1	0	0	0	3
ILMN_1660199	ACAA2	0	0	0	3
ILMN_2331636	ACACA	0	0	0	3
ILMN_1772123	ACACA	0	0	0	3
ILMN_1687303	ACAD10	0.0012987	0.00519481	0	3
ILMN_1761058	ACAD11	0	0	0	3
ILMN_2225595	ACAD8	0	0	0	3
ILMN_1775579	ACAD9	0	0	0	3
ILMN_1778104	ACADM	0	0	0	3
ILMN_2053679	ACADM	0	0	0	3
ILMN_1806408	ACADVL	0	0	0	3
ILMN_2352009	ACADVL	0	0	0	3
ILMN_3236270	ACAP2	0.0012987	0	0	3
ILMN_1800008	ACAT1	0	0	0	3
ILMN_2133799	ACAT2	0	0	0	3
ILMN_1708672	ACAT2	0	0	0	3
ILMN_1665945	ACBD3	0	0	0	3
ILMN_1693250	ACBD5	0.0142857	0.0155844	0.0246753	3
ILMN_2410362	ACBD5	0.0012987	0.00649351	0	3
ILMN_1684271	ACBD6	0	0	0	3
ILMN_1726388	ACBD7	0.00649351	0.00519481	0	3
ILMN_1769694	ACCN2	0	0	0	3
ILMN_1716480	ACD	0	0	0	3
ILMN_3235340	ACER2	0.0012987	0.00649351	0.00519481	3
ILMN_2333219	ACHE	0	0.0168831	0.0207792	3
ILMN_1735471	ACHE	0.00909091	0.0350649	0.0246753	3
ILMN_1699636	ACIN1	0	0	0	3
ILMN_2371379	ACLY	0	0	0	3
ILMN_1749014	ACLY	0	0	0	3
ILMN_1771348	ACN9	0	0	0	3
ILMN_2134039	ACN9	0	0	0	3
ILMN_1750800	ACO1	0	0	0	3
ILMN_1654861	ACO2	0	0	0	3
ILMN_1740265	ACOT7	0	0	0	3
ILMN_2332250	ACOT7	0	0	0	3
ILMN_1679600	ACOT8	0	0.0025974	0.00519481	3
ILMN_2367070	ACOT9	0	0	0	3
ILMN_1658995	ACOT9	0	0	0	3
ILMN_1750158	ACOX1	0	0	0	3
ILMN_1685703	ACOX2	0	0	0	3
ILMN_1743396	ACOX3	0	0	0	3
ILMN_1669633	ACP1	0	0	0	3
ILMN_2344956	ACP1	0	0	0	3
ILMN_2104830	ACP2	0	0	0	3
ILMN_2234343	ACP6	0	0	0	3
ILMN_1706598	ACPL2	0	0	0	3
ILMN_2306955	ACPL2	0	0	0	3
ILMN_2227011	ACSBG1	0	0	0	3
ILMN_2360705	ACSL3	0	0	0	3
ILMN_1666096	ACSL3	0	0	0	3
ILMN_1683598	ACSL4	0	0	0	3
ILMN_2336595	ACSS2	0	0	0	3
ILMN_1714197	ACSS2	0	0	0	3
ILMN_1671703	ACTA2	0	0	0	3
ILMN_2152131	ACTB	0	0	0	3
ILMN_1777296	ACTB	0	0	0	3
ILMN_2038777	ACTB	0	0	0	3
ILMN_2053178	ACTG1	0	0	0	3
ILMN_1704961	ACTG1	0	0	0	3
ILMN_1749297	ACTL6A	0	0	0	3
ILMN_2328280	ACTL6A	0	0	0	3
ILMN_2232177	ACTN1	0	0	0	3
ILMN_1725534	ACTN4	0	0	0	3
ILMN_1798254	ACTR10	0	0	0	3
ILMN_1792314	ACTR1A	0	0	0	3
ILMN_1695821	ACTR1B	0	0	0	3
ILMN_2388605	ACTR2	0	0	0	3
ILMN_1657153	ACTR3	0	0	0	3
ILMN_2260392	ACTR3B	0.0012987	0.0025974	0.00519481	3
ILMN_2346451	ACTR3B	0.0415584	0.0168831	0.0103896	3
ILMN_1652594	ACTR5	0	0.0025974	0.0038961	3
ILMN_1697585	ACTR6	0	0	0	3
ILMN_1689162	ACTR8	0	0	0	3
ILMN_1760490	ACVR1	0	0	0	3
ILMN_2243308	ACVR1B	0	0	0	3
ILMN_1670912	ACVR2A	0.00909091	0.00519481	0.0012987	3
ILMN_2152711	ACVR2A	0	0	0	3
ILMN_1683883	ACY1	0	0.0012987	0	3
ILMN_2319825	ACYP1	0	0	0	3
ILMN_1694233	ACYP1	0	0	0	3
ILMN_1697550	ACYP2	0	0	0	3
ILMN_2158705	ACYP2	0	0	0	3
ILMN_1803686	ADA	0	0	0	3
ILMN_1725043	ADAL	0	0.0012987	0	3
ILMN_1718946	ADAM10	0	0	0	3
ILMN_1726266	ADAM12	0.0142857	0.00649351	0.0142857	3
ILMN_1705689	ADAM12	0	0	0.0012987	3
ILMN_2384544	ADAM15	0	0	0	3
ILMN_1756920	ADAM15	0	0	0	3
ILMN_1751500	ADAM15	0.0012987	0.00519481	0.00519481	3
ILMN_2121068	ADAM17	0	0	0	3
ILMN_1765779	ADAM17	0.012987	0.0168831	0.0194805	3
ILMN_1713751	ADAM19	0	0	0	3
ILMN_1675210	ADAM22	0.0363636	0.0376623	0.0311688	3
ILMN_2060086	ADAM23	0.0298701	0.0233766	0.0207792	3
ILMN_1673566	ADAMTS1	0.0142857	0	0	3
ILMN_1703803	ADAMTS3	0	0	0	3
ILMN_2092933	ADAMTS4	0.0038961	0.0012987	0	3
ILMN_1805543	ADAMTS9	0.0012987	0	0	3
ILMN_1776777	ADAR	0	0	0	3
ILMN_2320964	ADAR	0	0	0	3
ILMN_2319326	ADARB1	0.048052	0.0233766	0.00909091	3
ILMN_1679797	ADARB1	0	0	0	3
ILMN_1657139	ADAT1	0	0	0	3
ILMN_1806275	ADAT3	0.0025974	0.0285714	0	3
ILMN_1698777	ADCK1	0	0	0	3
ILMN_1663132	ADCK2	0	0	0	3
ILMN_1700349	ADCK4	0	0	0	3
ILMN_2120555	ADCY1	0	0	0	3
ILMN_1742073	ADCY1	0	0	0	3
ILMN_1676893	ADCY3	0	0	0	3
ILMN_2311674	ADCY6	0	0.00519481	0	3
ILMN_1685156	ADCY6	0	0	0	3
ILMN_1754440	ADCY8	0	0	0	3
ILMN_1654287	ADCY9	0.0025974	0.0025974	0	3
ILMN_2356786	ADD1	0	0	0	3
ILMN_1759252	ADD1	0	0	0	3
ILMN_1814526	ADD3	0	0	0	3
ILMN_1738604	ADH5	0	0	0	3
ILMN_1813975	ADI1	0.0038961	0.0012987	0	3
ILMN_2096322	ADIPOR1	0	0	0	3
ILMN_1688322	ADIPOR1	0	0	0	3
ILMN_2224833	ADIPOR2	0	0	0	3
ILMN_2358626	ADK	0	0	0	3
ILMN_1801020	ADK	0	0	0.0103896	3
ILMN_1708934	ADM	0	0	0	3
ILMN_1657993	ADNP	0	0	0	3
ILMN_2080751	ADNP2	0	0	0	3
ILMN_1690352	ADO	0	0	0	3
ILMN_2373444	ADORA1	0	0	0	3
ILMN_1747227	ADORA1	0	0	0	3
ILMN_1703946	ADORA2B	0.0012987	0.00519481	0	3
ILMN_1793959	ADPGK	0	0	0	3
ILMN_1811480	ADPRHL2	0	0	0	3
ILMN_1679754	ADRA1B	0.00779221	0.0038961	0	3
ILMN_1659371	ADRA2A	0.0025974	0.00649351	0.00909091	3
ILMN_1677868	ADRA2B	0.0012987	0.00779221	0.0181818	3
ILMN_3307926	ADRBK1	0	0	0	3
ILMN_2389013	ADRM1	0	0	0	3
ILMN_1760143	ADRM1	0	0	0	3
ILMN_1790757	ADSL	0	0	0	3
ILMN_2092664	ADSS	0	0	0	3
ILMN_1778796	ADSS	0	0	0	3
ILMN_1736178	AEBP1	0	0	0	3
ILMN_1803376	AEBP2	0	0	0	3
ILMN_3240321	AEN	0	0	0	3
ILMN_1712944	AES	0	0	0	3
ILMN_2333107	AES	0	0	0	3
ILMN_1701998	AFAP1	0	0	0	3
ILMN_1730995	AFAP1L2	0	0	0	3
ILMN_2404917	AFAP1L2	0.00779221	0.012987	0.0103896	3
ILMN_1673119	AFF1	0.0246753	0.0168831	0.0363636	3
ILMN_2129015	AFF1	0.00779221	0.0116883	0.00909091	3
ILMN_1725889	AFF2	0	0	0	3
ILMN_1775235	AFF3	0	0	0	3
ILMN_1708502	AFF4	0	0	0	3
ILMN_2066124	AFG3L2	0	0	0	3
ILMN_2095653	AFMID	0	0.0012987	0	3
ILMN_2402766	AFTPH	0	0	0	3
ILMN_1767722	AFTPH	0.0142857	0.00519481	0	3
ILMN_2342841	AFTPH	0	0.00519481	0.0012987	3
ILMN_1802631	AGA	0	0	0	3
ILMN_2269136	AGAP3	0	0	0	3
ILMN_3239130	AGAP6	0.0376623	0.025974	0.025974	3
ILMN_3242883	AGAP8	0.00519481	0.00519481	0.0142857	3
ILMN_2308689	AGBL5	0	0	0	3
ILMN_2290776	AGBL5	0	0.0025974	0	3
ILMN_3181215	AGFG1	0.0025974	0.00649351	0.0415584	3
ILMN_3260345	AGFG1	0	0	0	3
ILMN_1703228	AGFG2	0.00519481	0.0038961	0	3
ILMN_2064917	AGGF1	0	0	0	3
ILMN_1776153	AGGF1	0	0.0038961	0	3
ILMN_1772645	AGK	0	0	0	3
ILMN_2371825	AGL	0	0	0	3
ILMN_1664006	AGL	0.0012987	0	0.0181818	3
ILMN_1679520	AGPAT1	0	0	0	3
ILMN_1732176	AGPAT2	0.0025974	0.00519481	0.00519481	3
ILMN_1654010	AGPAT3	0.00519481	0.012987	0.0207792	3
ILMN_1730504	AGPAT4	0	0	0	3
ILMN_1662049	AGPAT5	0	0	0	3
ILMN_1740752	AGPAT6	0	0.0025974	0	3
ILMN_1794875	AGPAT9	0	0	0	3
ILMN_1698209	AGPS	0	0	0	3
ILMN_1770454	AGRN	0	0	0	3
ILMN_1813530	AGT	0	0	0	3
ILMN_1718071	AGTPBP1	0	0	0	3
ILMN_1802458	AGTRAP	0	0	0	3
ILMN_2307656	AGTRAP	0	0	0	3
ILMN_1673529	AGXT2L2	0.00519481	0.00519481	0.00519481	3
ILMN_1809139	AHCTF1	0	0	0	3
ILMN_1747504	AHCTF1	0	0	0	3
ILMN_1657862	AHCY	0	0	0	3
ILMN_1770412	AHCYL1	0	0	0	3
ILMN_1712786	AHCYL2	0	0.0012987	0	3
ILMN_1791006	AHI1	0.0012987	0	0	3
ILMN_1714567	AHNAK	0	0	0	3
ILMN_1752159	AHNAK	0.0142857	0.00649351	0.0025974	3
ILMN_3243156	AHNAK2	0	0	0	3
ILMN_1812640	AHR	0	0	0	3
ILMN_1703617	AHSA1	0	0	0	3
ILMN_1696512	AHSP	0.0038961	0.00519481	0.0181818	3
ILMN_3240117	AIDA	0	0	0	3
ILMN_1703538	AIF1	0.0142857	0.0272727	0.038961	3
ILMN_1792473	AIF1	0.0012987	0	0.00519481	3
ILMN_3246401	AIF1L	0	0	0	3
ILMN_1770725	AIF1L	0	0	0	3
ILMN_2313821	AIFM1	0	0	0	3
ILMN_1717357	AIFM1	0.0012987	0.00519481	0.0181818	3
ILMN_1668408	AIFM1	0	0	0	3
ILMN_1667183	AIFM1	0.0142857	0.00519481	0.0012987	3
ILMN_1797974	AIG1	0	0	0	3
ILMN_1681301	AIM2	0.0025974	0.00519481	0	3
ILMN_1673252	AIMP2	0	0	0	3
ILMN_2103841	AIP	0	0	0	3
ILMN_2261519	AIRE	0	0	0	3
ILMN_1723521	AJAP1	0.0415584	0.00519481	0.0025974	3
ILMN_1779965	AK1	0	0	0	3
ILMN_1670542	AK2	0	0	0	3
ILMN_1655645	AK2	0.0298701	0.0168831	0.00909091	3
ILMN_1716053	AK2	0	0	0	3
ILMN_1778173	AK3	0	0	0	3
ILMN_2338038	AK3L1	0.0012987	0.0025974	0	3
ILMN_2387712	AK5	0	0.0012987	0	3
ILMN_1718808	AKAP10	0.0025974	0.0025974	0.00519481	3
ILMN_2293758	AKAP11	0	0	0	3
ILMN_1693220	AKAP11	0	0	0	3
ILMN_1684836	AKAP12	0	0	0	3
ILMN_2308950	AKAP12	0	0	0	3
ILMN_1709101	AKAP13	0.0025974	0	0	3
ILMN_2396956	AKAP13	0	0	0	3
ILMN_1733690	AKAP7	0	0	0	3
ILMN_1741572	AKAP8	0	0	0	3
ILMN_1768962	AKAP8L	0	0.0025974	0	3
ILMN_1802799	AKIRIN1	0	0	0	3
ILMN_2148847	AKIRIN2	0	0	0	3
ILMN_1770673	AKNA	0.0272727	0.00519481	0.0025974	3
ILMN_1728047	AKR1A1	0	0	0	3
ILMN_2380771	AKR1A1	0	0	0	3
ILMN_1701731	AKR1B1	0	0	0	3
ILMN_2412336	AKR1C2	0	0	0	3
ILMN_1713124	AKR1C3	0	0	0	3
ILMN_1687757	AKR1C4	0	0	0	3
ILMN_2157277	AKR1D1	0	0	0	3
ILMN_1677043	AKR7A2	0	0	0	3
ILMN_2145396	AKR7A3	0	0	0	3
ILMN_2388507	AKT1	0	0	0	3
ILMN_2410909	AKT1	0	0	0	3
ILMN_1726906	AKT1S1	0.0012987	0.0168831	0.0103896	3
ILMN_2377240	AKTIP	0	0	0	3
ILMN_1665982	AKTIP	0	0	0	3
ILMN_1747577	ALAD	0	0	0	3
ILMN_1700047	ALAS1	0.0285714	0.0285714	0.0103896	3
ILMN_2385647	ALAS1	0.0012987	0.0116883	0	3
ILMN_1782939	ALB	0.00649351	0.0233766	0.0038961	3
ILMN_1670870	ALCAM	0	0	0	3
ILMN_2051381	ALDH16A1	0	0.0025974	0	3
ILMN_2302716	ALDH18A1	0	0	0	3
ILMN_2150894	ALDH1B1	0	0	0	3
ILMN_1675398	ALDH1B1	0.00909091	0.0025974	0.00909091	3
ILMN_1793859	ALDH2	0	0	0	3
ILMN_1667564	ALDH3A2	0	0	0	3
ILMN_1794825	ALDH3A2	0	0	0	3
ILMN_2401641	ALDH3A2	0	0	0	3
ILMN_1728662	ALDH3B1	0	0.00519481	0	3
ILMN_1656368	ALDH4A1	0	0	0	3
ILMN_2372403	ALDH5A1	0	0	0	3
ILMN_2372398	ALDH5A1	0	0	0	3
ILMN_1785284	ALDH6A1	0	0	0	3
ILMN_1687508	ALDH7A1	0	0	0	3
ILMN_1763461	ALDH7A1	0	0	0	3
ILMN_1761804	ALDH9A1	0	0	0	3
ILMN_1736700	ALDOA	0	0	0	3
ILMN_2251253	ALDOA	0.0181818	0.00519481	0.00519481	3
ILMN_1741148	ALDOA	0	0	0	3
ILMN_1755974	ALDOC	0	0	0	3
ILMN_3243268	ALG10	0.0246753	0.0168831	0.0181818	3
ILMN_1666325	ALG10B	0.00519481	0.0012987	0	3
ILMN_3251482	ALG10B	0	0	0	3
ILMN_2147503	ALG13	0.0012987	0.0025974	0	3
ILMN_1761456	ALG13	0	0	0	3
ILMN_1743635	ALG14	0	0	0	3
ILMN_2191822	ALG14	0	0	0	3
ILMN_1711886	ALG3	0	0	0	3
ILMN_1664449	ALG5	0	0	0	3
ILMN_1771411	ALG6	0	0	0	3
ILMN_2365686	ALG8	0	0	0	3
ILMN_1685413	ALG8	0	0	0	3
ILMN_1732809	ALG9	0	0	0	3
ILMN_1753135	ALK	0	0	0	3
ILMN_1758038	ALKBH1	0	0	0	3
ILMN_2375973	ALKBH1	0	0	0	3
ILMN_1690252	ALKBH2	0	0	0	3
ILMN_2134062	ALKBH3	0	0	0	3
ILMN_1805673	ALKBH4	0.0025974	0.0012987	0	3
ILMN_1657283	ALKBH5	0	0	0	3
ILMN_1808792	ALKBH6	0	0	0	3
ILMN_1761764	ALKBH7	0	0	0	3
ILMN_1709474	ALMS1	0.0012987	0.0012987	0	3
ILMN_1811238	ALPK2	0	0	0	3
ILMN_1701603	ALPL	0.0012987	0	0	3
ILMN_1693789	ALPP	0	0	0	3
ILMN_1750256	ALS2	0	0	0	3
ILMN_1787314	ALS2CR14	0.0025974	0	0	3
ILMN_1800958	ALS2CR4	0	0	0	3
ILMN_3236443	ALX1	0	0	0	3
ILMN_1759670	AMACR	0	0.0012987	0	3
ILMN_2367172	AMACR	0.0038961	0.0025974	0.0181818	3
ILMN_1751092	AMBN	0.0181818	0.0155844	0.0246753	3
ILMN_1788462	AMD1	0	0	0	3
ILMN_1667994	AMD1	0	0	0	3
ILMN_1695759	AMDHD2	0	0	0	3
ILMN_1723116	AMFR	0	0	0.00519481	3
ILMN_1666258	AMFR	0.00519481	0.0220779	0.0233766	3
ILMN_1779374	AMMECR1	0	0	0	3
ILMN_2394242	AMMECR1	0.0025974	0	0.0025974	3
ILMN_1727023	AMMECR1L	0	0	0	3
ILMN_1792409	AMOT	0	0	0	3
ILMN_1685834	AMPH	0	0	0	3
ILMN_1665331	AMT	0.0038961	0	0	3
ILMN_2294762	AMY1A	0	0	0	3
ILMN_1726327	AMY1B	0	0	0	3
ILMN_1663313	AMY1C	0	0	0	3
ILMN_2309549	AMZ2	0.00779221	0.0168831	0.0415584	3
ILMN_1801606	AMZ2	0	0	0	3
ILMN_1804812	ANAPC1	0	0	0	3
ILMN_1659553	ANAPC1	0	0	0	3
ILMN_1770378	ANAPC10	0	0	0	3
ILMN_2343563	ANAPC11	0	0	0	3
ILMN_1722102	ANAPC11	0	0	0	3
ILMN_1793894	ANAPC13	0	0	0	3
ILMN_1802973	ANAPC4	0	0	0	3
ILMN_1723177	ANAPC5	0	0	0	3
ILMN_2199284	ANAPC7	0.0038961	0.00519481	0.038961	3
ILMN_1696974	ANG	0	0.0025974	0.0233766	3
ILMN_1760727	ANG	0.0142857	0.00519481	0.00519481	3
ILMN_1665871	ANGEL1	0.00519481	0.00649351	0	3
ILMN_1736340	ANGEL2	0	0	0	3
ILMN_1772612	ANGPTL2	0	0	0	3
ILMN_2386444	ANGPTL4	0	0	0.00779221	3
ILMN_1707727	ANGPTL4	0	0	0	3
ILMN_1776363	ANK2	0	0	0	3
ILMN_2390609	ANK3	0.0142857	0.00519481	0.00519481	3
ILMN_1794470	ANKFY1	0	0	0	3
ILMN_1765091	ANKHD1	0	0	0	3
ILMN_1766560	ANKHD1-EIF4EBP3	0.0142857	0.0038961	0.0103896	3
ILMN_3241218	ANKIB1	0	0	0	3
ILMN_3249608	ANKLE2	0	0	0	3
ILMN_1675483	ANKMY1	0.0038961	0.0012987	0	3
ILMN_1784292	ANKMY2	0	0	0	3
ILMN_1687351	ANKRA2	0	0	0	3
ILMN_2185563	ANKRA2	0	0	0	3
ILMN_1711828	ANKRD10	0.0012987	0.0025974	0.012987	3
ILMN_2115218	ANKRD10	0	0.00519481	0	3
ILMN_2108709	ANKRD11	0	0	0	3
ILMN_1661833	ANKRD12	0	0	0	3
ILMN_1689908	ANKRD13A	0	0	0	3
ILMN_1794070	ANKRD13B	0.0038961	0.00649351	0.0012987	3
ILMN_2148507	ANKRD13C	0	0	0	3
ILMN_1659156	ANKRD16	0	0	0	3
ILMN_2353431	ANKRD16	0	0.0025974	0	3
ILMN_2406335	ANKRD17	0	0	0	3
ILMN_1712019	ANKRD17	0	0	0	3
ILMN_2132599	ANKRD22	0.0454546	0.00649351	0.0220779	3
ILMN_1794063	ANKRD27	0.00519481	0.0181818	0.00909091	3
ILMN_2232520	ANKRD28	0.0038961	0.0012987	0	3
ILMN_1730678	ANKRD30B	0	0	0	3
ILMN_2214278	ANKRD32	0	0	0	3
ILMN_1805985	ANKRD32	0.0025974	0	0	3
ILMN_1667748	ANKRD33	0	0	0	3
ILMN_2145153	ANKRD35	0.00909091	0.0233766	0.00779221	3
ILMN_1780806	ANKRD36B	0.0142857	0.0181818	0.0311688	3
ILMN_1710979	ANKRD39	0	0	0	3
ILMN_1758846	ANKRD40	0	0	0	3
ILMN_1712298	ANKRD46	0	0	0	3
ILMN_1669259	ANKRD49	0	0	0	3
ILMN_2226304	ANKRD50	0	0	0	3
ILMN_3244029	ANKRD52	0	0	0	3
ILMN_1766309	ANKRD54	0	0	0	3
ILMN_1724040	ANKRD57	0	0	0	3
ILMN_1698159	ANKRD6	0.0025974	0.0168831	0.025974	3
ILMN_2178587	ANKRD6	0	0	0	3
ILMN_2048607	ANKRD9	0	0	0	3
ILMN_1813669	ANKS1A	0	0	0	3
ILMN_1758392	ANKS1B	0	0	0	3
ILMN_2340974	ANKS1B	0	0	0	3
ILMN_1677487	ANKZF1	0.0025974	0.012987	0.0025974	3
ILMN_1739645	ANLN	0	0	0	3
ILMN_1767111	ANO10	0	0	0.0012987	3
ILMN_1674941	ANO6	0	0	0	3
ILMN_1683824	ANO7	0.0038961	0.0012987	0.00519481	3
ILMN_1807945	ANP32A	0	0	0	3
ILMN_1684293	ANP32B	0	0	0	3
ILMN_1655868	ANP32C	0	0	0.038961	3
ILMN_1670379	ANTXR1	0	0	0	3
ILMN_1811877	ANTXR1	0	0	0	3
ILMN_2387995	ANTXR1	0	0.0025974	0.0012987	3
ILMN_1780894	ANTXR1	0.0025974	0.0012987	0.038961	3
ILMN_1812926	ANTXR2	0	0	0	3
ILMN_2184184	ANXA1	0	0	0	3
ILMN_1711899	ANXA2	0	0	0	3
ILMN_1755937	ANXA2	0	0	0	3
ILMN_2409167	ANXA2	0	0	0	3
ILMN_1698100	ANXA2P1	0	0	0	3
ILMN_2041101	ANXA2P1	0	0	0	3
ILMN_3235632	ANXA2P2	0	0	0	3
ILMN_1798372	ANXA2P3	0	0	0	3
ILMN_1741003	ANXA5	0	0	0	3
ILMN_2326591	ANXA6	0.0298701	0.0116883	0.0155844	3
ILMN_1678612	ANXA6	0.0012987	0.0012987	0	3
ILMN_1703791	ANXA7	0	0	0	3
ILMN_1813840	AOF2	0	0	0	3
ILMN_1781983	AP1B1	0	0	0	3
ILMN_2399627	AP1G1	0	0	0	3
ILMN_2399622	AP1G1	0	0	0	3
ILMN_1754738	AP1M1	0	0	0	3
ILMN_1751345	AP1S1	0	0	0	3
ILMN_1712806	AP1S1	0	0	0	3
ILMN_2316173	AP1S1	0	0	0	3
ILMN_1766411	AP1S2	0	0	0	3
ILMN_2120273	AP1S2	0	0	0	3
ILMN_1815306	AP2A1	0	0.00519481	0	3
ILMN_2359211	AP2A1	0.0038961	0.0155844	0.00909091	3
ILMN_1803779	AP2A2	0	0.00519481	0.00519481	3
ILMN_1681998	AP2B1	0	0	0	3
ILMN_2331735	AP2B1	0	0	0	3
ILMN_1699598	AP2M1	0	0	0	3
ILMN_2402798	AP2M1	0	0	0	3
ILMN_1662426	AP2S1	0	0	0	3
ILMN_1809957	AP2S1	0	0	0	3
ILMN_1768867	AP3B1	0	0	0	3
ILMN_1679256	AP3B2	0	0	0	3
ILMN_1764945	AP3D1	0	0	0	3
ILMN_2390114	AP3D1	0	0	0	3
ILMN_2362122	AP3M1	0	0	0	3
ILMN_1667086	AP3M1	0	0	0	3
ILMN_1676946	AP3M2	0	0	0	3
ILMN_2311761	AP3S1	0	0	0	3
ILMN_1731596	AP3S2	0	0	0	3
ILMN_1669377	AP4B1	0	0	0	3
ILMN_1754531	AP4E1	0	0	0	3
ILMN_1779512	AP4M1	0	0	0	3
ILMN_1659463	APAF1	0	0	0	3
ILMN_1723626	APBA2	0	0	0	3
ILMN_1686610	APBA3	0	0	0	3
ILMN_1801710	APBB1IP	0	0	0	3
ILMN_1740772	APBB3	0	0.0025974	0	3
ILMN_2320513	APBB3	0.0038961	0.00519481	0	3
ILMN_1659950	APC2	0.0025974	0.00519481	0.00519481	3
ILMN_1656951	APCDD1	0	0	0	3
ILMN_1740052	APEG1	0	0	0	3
ILMN_1718023	APEH	0	0	0	3
ILMN_2319344	APEX1	0	0	0	3
ILMN_1661886	APEX1	0	0	0	3
ILMN_1652505	APEX2	0	0	0	3
ILMN_1658472	APH1A	0	0	0	3
ILMN_2398388	APH1A	0	0	0	3
ILMN_1767816	APH1B	0	0	0	3
ILMN_1815051	API5	0	0	0	3
ILMN_1793598	APIP	0	0	0	3
ILMN_2128293	APIP	0	0	0	3
ILMN_1788135	APITD1	0	0	0	3
ILMN_1793360	APITD1	0	0	0	3
ILMN_2396198	APLP1	0	0	0	3
ILMN_1763834	APLP1	0	0	0	3
ILMN_2081465	APLP2	0	0	0	3
ILMN_1710482	APLP2	0	0	0	3
ILMN_1796737	APM-1	0.0038961	0	0	3
ILMN_1729533	APOA1BP	0	0	0	3
ILMN_2219466	APOBEC3B	0.0012987	0	0	3
ILMN_1675684	APOBEC3C	0.0012987	0.00519481	0.00779221	3
ILMN_2412172	APOBEC3F	0.0012987	0	0	3
ILMN_2296950	APOBEC3F	0	0	0	3
ILMN_2232478	APOBEC3G	0.0363636	0.0376623	0.0454546	3
ILMN_1731941	APOM	0	0	0	3
ILMN_1721623	APOO	0	0	0	3
ILMN_1777483	APOOL	0.0038961	0.0038961	0.0012987	3
ILMN_2404065	APP	0	0	0	3
ILMN_1653283	APP	0.0038961	0.0233766	0.00519481	3
ILMN_2404063	APP	0	0	0	3
ILMN_1694875	APPBP2	0.0025974	0	0.00519481	3
ILMN_2149766	APPBP2	0	0	0	3
ILMN_1763730	APPL1	0	0	0	3
ILMN_1765076	APPL2	0	0	0	3
ILMN_1722491	APRT	0	0	0	3
ILMN_1726410	APRT	0	0	0	3
ILMN_2317348	APTX	0	0	0	3
ILMN_1726752	APTX	0	0	0	3
ILMN_1762606	AQP11	0	0	0	3
ILMN_1747683	AQP4	0	0	0	3
ILMN_2177460	AQR	0.0142857	0.00519481	0	3
ILMN_1717154	AQR	0	0	0	3
ILMN_1767351	AR	0.0246753	0.00649351	0.00909091	3
ILMN_1658883	ARAF	0	0	0	3
ILMN_3269719	ARAP1	0.0038961	0.00519481	0	3
ILMN_3244434	ARAP2	0.0012987	0.0025974	0.038961	3
ILMN_3240997	ARAP3	0.00519481	0	0	3
ILMN_1812618	ARAP3	0	0	0	3
ILMN_1711120	ARC	0	0	0	3
ILMN_1699703	ARCN1	0	0	0	3
ILMN_1721977	ARD1A	0	0	0	3
ILMN_2330948	ARF1	0	0	0	3
ILMN_1802203	ARF1	0	0	0	3
ILMN_1682938	ARF3	0	0	0	3
ILMN_1723884	ARF4	0	0	0	3
ILMN_1719518	ARF4	0	0	0	3
ILMN_1752340	ARF5	0	0	0	3
ILMN_1675709	ARFGAP1	0	0	0	3
ILMN_1769250	ARFGAP2	0	0	0	3
ILMN_1731287	ARFGAP3	0	0	0	3
ILMN_2221408	ARFGEF1	0.0025974	0	0	3
ILMN_1728471	ARFGEF1	0	0	0	3
ILMN_2403906	ARFIP1	0	0	0	3
ILMN_1788468	ARGLU1	0	0	0	3
ILMN_1732060	ARHGAP1	0	0	0	3
ILMN_2395913	ARHGAP11A	0.0363636	0.00519481	0	3
ILMN_2101810	ARHGAP12	0	0	0	3
ILMN_1753500	ARHGAP12	0	0	0	3
ILMN_2208413	ARHGAP15	0.0142857	0.0233766	0.0103896	3
ILMN_1718610	ARHGAP17	0	0	0	3
ILMN_2398847	ARHGAP17	0	0.0038961	0	3
ILMN_1688953	ARHGAP19	0	0	0	3
ILMN_1811592	ARHGAP21	0	0	0	3
ILMN_1676361	ARHGAP22	0	0	0	3
ILMN_1764571	ARHGAP23	0	0	0	3
ILMN_1734742	ARHGDIA	0	0	0	3
ILMN_1678143	ARHGDIB	0	0	0	3
ILMN_2405129	ARHGEF1	0.0038961	0.00649351	0.0272727	3
ILMN_2132809	ARHGEF10	0	0	0	3
ILMN_1727205	ARHGEF10L	0.0012987	0.0025974	0.00519481	3
ILMN_2347380	ARHGEF11	0.00779221	0.00519481	0	3
ILMN_1733861	ARHGEF11	0.0012987	0.00519481	0.0246753	3
ILMN_1810712	ARHGEF12	0	0	0	3
ILMN_1754562	ARHGEF17	0.0012987	0.0233766	0.00519481	3
ILMN_1664016	ARHGEF18	0	0	0	3
ILMN_1703477	ARHGEF2	0	0	0	3
ILMN_1781010	ARHGEF3	0	0	0	3
ILMN_1666076	ARHGEF4	0.0025974	0.0168831	0	3
ILMN_1803423	ARHGEF6	0	0	0	3
ILMN_1796912	ARHGEF7	0	0	0	3
ILMN_1779370	ARHGEF9	0	0	0	3
ILMN_1797341	ARID1A	0	0	0	3
ILMN_1795247	ARID2	0.0012987	0	0	3
ILMN_2182335	ARID2	0	0	0	3
ILMN_1670130	ARID3A	0.0025974	0.0025974	0	3
ILMN_1696956	ARID3B	0.00519481	0.00519481	0.00519481	3
ILMN_1810229	ARID4A	0	0	0	3
ILMN_1721626	ARID5B	0	0	0	3
ILMN_1694219	ARIH1	0	0	0	3
ILMN_1792825	ARIH2	0	0	0	3
ILMN_1813091	ARL1	0	0	0	3
ILMN_2403047	ARL13B	0.0012987	0	0	3
ILMN_1774161	ARL15	0.0454546	0.00909091	0.0116883	3
ILMN_2188119	ARL16	0	0	0	3
ILMN_1679917	ARL16	0	0	0	3
ILMN_3231952	ARL17B	0	0	0	3
ILMN_1787879	ARL2	0	0	0	3
ILMN_1755391	ARL2BP	0	0	0	3
ILMN_1780444	ARL3	0	0	0	3
ILMN_1775405	ARL4A	0	0	0.0025974	3
ILMN_1743241	ARL4A	0.00519481	0.0155844	0.00909091	3
ILMN_1768391	ARL4C	0	0	0	3
ILMN_1719010	ARL4D	0.0025974	0.00519481	0.0103896	3
ILMN_2332558	ARL5A	0	0	0	3
ILMN_1688526	ARL5A	0	0	0	3
ILMN_2120022	ARL5B	0	0	0	3
ILMN_1708416	ARL6IP1	0	0	0	3
ILMN_2113362	ARL6IP1	0	0	0	3
ILMN_1791149	ARL6IP4	0	0	0	3
ILMN_2393144	ARL6IP4	0	0	0	3
ILMN_1769810	ARL6IP5	0	0	0	3
ILMN_1797964	ARL6IP6	0	0	0	3
ILMN_1752837	ARL8B	0	0	0	3
ILMN_1722066	ARMC1	0	0	0	3
ILMN_1689296	ARMC10	0	0	0	3
ILMN_2052598	ARMC10	0	0	0	3
ILMN_1697118	ARMC6	0	0	0	3
ILMN_1797298	ARMC7	0	0	0	3
ILMN_1781151	ARMC8	0	0	0	3
ILMN_2385318	ARMC8	0.0298701	0.00519481	0.00519481	3
ILMN_2180677	ARMCX1	0	0	0	3
ILMN_1788192	ARMCX1	0	0	0	3
ILMN_1785170	ARMCX2	0	0	0	3
ILMN_2334760	ARMCX3	0	0	0	3
ILMN_2334765	ARMCX3	0	0	0	3
ILMN_2414533	ARMCX6	0	0	0	3
ILMN_1716026	ARMCX6	0	0	0	3
ILMN_2183510	ARMET	0	0	0	3
ILMN_2347314	ARNT	0	0.0012987	0	3
ILMN_1718046	ARNT2	0	0	0	3
ILMN_2405305	ARNTL	0	0	0	3
ILMN_1759915	ARPC1A	0	0	0	3
ILMN_2085760	ARPC1B	0.0025974	0.00649351	0	3
ILMN_1792489	ARPC2	0	0	0	3
ILMN_1655561	ARPC3	0	0	0	3
ILMN_2393763	ARPC4	0	0	0	3
ILMN_1707336	ARPC4	0	0	0	3
ILMN_1768394	ARPC5	0	0	0	3
ILMN_2043816	ARPC5L	0	0	0	3
ILMN_1772798	ARPP19	0	0	0	3
ILMN_2059505	ARPP19	0	0	0	3
ILMN_2289825	ARPP-21	0.0337662	0.012987	0.0272727	3
ILMN_1730620	ARRB1	0.0207792	0.0350649	0.00779221	3
ILMN_1715181	ARRDC2	0.0012987	0	0	3
ILMN_2198515	ARRDC3	0	0	0.00649351	3
ILMN_1660544	ARRDC4	0.0012987	0.0012987	0	3
ILMN_2358202	ARS2	0	0	0	3
ILMN_2047240	ARSA	0	0	0	3
ILMN_1656477	ARSA	0.0285714	0.0350649	0.00519481	3
ILMN_2242937	ARSB	0	0	0	3
ILMN_1712587	ARSB	0	0	0	3
ILMN_1684873	ARSD	0	0	0	3
ILMN_1679318	ARSJ	0	0	0	3
ILMN_1807913	ART1	0.0012987	0.0233766	0.00519481	3
ILMN_1805773	ART4	0.00519481	0.0233766	0.0103896	3
ILMN_1800935	ARV1	0	0	0	3
ILMN_1771732	AS3MT	0	0	0	3
ILMN_1684054	ASAH1	0	0.0025974	0	3
ILMN_3242048	ASAH2C	0.0181818	0.0272727	0.00519481	3
ILMN_2233366	ASAP1	0	0	0	3
ILMN_3245057	ASAP1	0	0	0	3
ILMN_1690963	ASAP1	0	0	0	3
ILMN_3270972	ASAP2	0	0	0	3
ILMN_3194508	ASAP2	0	0	0	3
ILMN_1685441	ASAP3	0	0	0	3
ILMN_1683096	ASB1	0	0	0	3
ILMN_1654385	ASB13	0	0	0	3
ILMN_2358784	ASB3	0	0	0	3
ILMN_2358783	ASB3	0	0	0	3
ILMN_1699606	ASB3	0	0	0	3
ILMN_1806705	ASB6	0.0012987	0.0025974	0	3
ILMN_2397776	ASB6	0.0025974	0	0	3
ILMN_2173740	ASB8	0	0	0	3
ILMN_1783675	ASB8	0	0	0	3
ILMN_1685097	ASCC1	0	0	0	3
ILMN_1679919	ASCC2	0	0	0	3
ILMN_1745772	ASCC3	0	0	0	3
ILMN_2294751	ASCC3	0	0	0	3
ILMN_1701653	ASCL1	0	0	0	3
ILMN_1714737	ASF1A	0	0	0	3
ILMN_1695414	ASF1B	0	0	0	3
ILMN_1769013	ASGR1	0	0	0	3
ILMN_1782032	ASH1L	0.00519481	0.0025974	0.00519481	3
ILMN_1666933	ASH2L	0	0	0	3
ILMN_2379393	ASL	0.0038961	0	0	3
ILMN_1804384	ASMTL	0.00519481	0.0285714	0.0181818	3
ILMN_1732615	ASMTL	0	0	0	3
ILMN_1689786	ASMTL	0	0	0	3
ILMN_1657571	ASNA1	0.00519481	0.0012987	0	3
ILMN_1796417	ASNS	0	0	0	3
ILMN_2398107	ASNS	0	0	0	3
ILMN_2221673	ASNSD1	0	0	0	3
ILMN_1708950	ASPHD1	0.0012987	0.0038961	0.0142857	3
ILMN_1815184	ASPM	0	0	0	3
ILMN_1660749	ASPSCR1	0	0	0	3
ILMN_1708778	ASS1	0	0	0	3
ILMN_2395451	ASS1	0	0	0	3
ILMN_1684959	ASTN1	0	0.0012987	0	3
ILMN_1744118	ASTN2	0	0	0	3
ILMN_1726025	ASXL1	0	0	0	3
ILMN_1698968	ASXL2	0.00779221	0.0025974	0	3
ILMN_1654497	ATAD1	0	0	0	3
ILMN_2169983	ATAD1	0	0	0	3
ILMN_2048700	ATAD2	0	0	0	3
ILMN_3235282	ATAD2B	0.012987	0.00649351	0	3
ILMN_1738530	ATAD3A	0	0	0	3
ILMN_1812479	ATE1	0.0025974	0.00519481	0	3
ILMN_1801923	ATF1	0.0038961	0	0.00519481	3
ILMN_1748271	ATF2	0.0012987	0.0025974	0	3
ILMN_2374865	ATF3	0	0	0	3
ILMN_1672128	ATF4	0	0	0	3
ILMN_2358457	ATF4	0	0	0	3
ILMN_1669113	ATF5	0	0	0	3
ILMN_1703471	ATF6	0	0	0	3
ILMN_3194911	ATF6B	0.00519481	0.0025974	0	3
ILMN_1748968	ATG10	0	0	0	3
ILMN_2188204	ATG12	0	0	0	3
ILMN_1673898	ATG12	0.00649351	0.0025974	0	3
ILMN_1725707	ATG16L1	0	0	0	3
ILMN_2365881	ATG16L1	0	0	0	3
ILMN_1664644	ATG16L2	0.0298701	0.012987	0.00519481	3
ILMN_1756006	ATG2A	0	0	0	3
ILMN_1769566	ATG3	0	0	0	3
ILMN_2163732	ATG3	0.048052	0.0233766	0.0246753	3
ILMN_2313782	ATG4A	0	0	0	3
ILMN_3307158	ATG4A	0	0	0	3
ILMN_2411915	ATG4B	0	0	0	3
ILMN_1700923	ATG4C	0	0	0	3
ILMN_2180315	ATG4D	0.00519481	0.0272727	0.0181818	3
ILMN_1801905	ATG4D	0	0.00519481	0	3
ILMN_1718265	ATG5	0	0	0	3
ILMN_1790978	ATG7	0	0	0	3
ILMN_2410975	ATG9A	0	0	0	3
ILMN_1739008	ATG9A	0	0	0	3
ILMN_1673991	ATIC	0	0	0	3
ILMN_3255124	ATL1	0	0	0	3
ILMN_3181411	ATL1	0	0	0	3
ILMN_1751086	ATL3	0	0	0	3
ILMN_2370825	ATM	0	0	0	3
ILMN_1779214	ATM	0	0	0	3
ILMN_1772540	ATMIN	0	0	0	3
ILMN_2223720	ATMIN	0	0	0	3
ILMN_1737833	ATN1	0	0	0	3
ILMN_1670609	ATOX1	0	0	0	3
ILMN_3307935	ATP10A	0	0	0	3
ILMN_1658884	ATP11B	0.0012987	0.012987	0	3
ILMN_2124155	ATP11B	0.0012987	0	0	3
ILMN_2389810	ATP11C	0.0012987	0.00519481	0.0025974	3
ILMN_2134224	ATP13A1	0	0	0	3
ILMN_1704164	ATP13A2	0	0.00779221	0	3
ILMN_1731783	ATP1A1	0	0	0	3
ILMN_2415189	ATP1A1	0	0	0	3
ILMN_1775566	ATP1A1	0	0	0	3
ILMN_1777411	ATP1A2	0.0142857	0.0233766	0.00909091	3
ILMN_1658071	ATP1B1	0	0	0	3
ILMN_2407824	ATP1B1	0	0	0	3
ILMN_1730291	ATP1B1	0	0	0	3
ILMN_1747271	ATP1B2	0	0	0	3
ILMN_1783304	ATP1B3	0	0	0	3
ILMN_1654322	ATP1B3	0	0	0	3
ILMN_1759628	ATP1B3	0	0	0	3
ILMN_1655884	ATP2A2	0	0	0	3
ILMN_1687375	ATP2A2	0	0	0	3
ILMN_1815666	ATP2A2	0	0	0	3
ILMN_2401933	ATP2B1	0	0	0	3
ILMN_1813399	ATP2B1	0	0	0	3
ILMN_1802223	ATP2B2	0.012987	0.00519481	0	3
ILMN_2381938	ATP2B2	0	0	0	3
ILMN_1664772	ATP2B4	0	0	0	3
ILMN_1680579	ATP2B4	0	0	0	3
ILMN_2367753	ATP2B4	0	0	0	3
ILMN_1696568	ATP2C1	0	0	0	3
ILMN_1758784	ATP2C1	0.0012987	0	0	3
ILMN_2340565	ATP2C1	0	0	0	3
ILMN_2341363	ATP5A1	0	0	0	3
ILMN_1764494	ATP5A1	0	0	0	3
ILMN_1772132	ATP5B	0	0	0	3
ILMN_1701269	ATP5C1	0	0	0	3
ILMN_1679178	ATP5D	0	0	0	3
ILMN_1653599	ATP5D	0	0	0	3
ILMN_3261197	ATP5E	0	0	0	3
ILMN_1756674	ATP5EP2	0	0	0	3
ILMN_2225887	ATP5EP2	0	0	0	3
ILMN_1672191	ATP5F1	0	0	0	3
ILMN_1721989	ATP5F1	0	0	0	3
ILMN_1712430	ATP5G1	0	0	0	3
ILMN_1676393	ATP5G1	0	0	0	3
ILMN_1660577	ATP5G2	0	0	0	3
ILMN_1770466	ATP5G3	0.0025974	0	0	3
ILMN_1794912	ATP5H	0	0	0	3
ILMN_1666372	ATP5H	0	0	0	3
ILMN_1726603	ATP5I	0	0	0	3
ILMN_1772506	ATP5I	0	0	0	3
ILMN_1652806	ATP5J	0	0	0	3
ILMN_1772929	ATP5J	0	0	0	3
ILMN_2348093	ATP5J	0	0	0	3
ILMN_2307883	ATP5J2	0	0	0	3
ILMN_2310621	ATP5J2	0	0	0	3
ILMN_2079285	ATP5L	0	0	0	3
ILMN_1812638	ATP5L	0	0	0	3
ILMN_1791332	ATP5O	0	0	0	3
ILMN_1700625	ATP5S	0	0	0	3
ILMN_1679188	ATP5S	0	0	0	3
ILMN_2299843	ATP5S	0	0	0	3
ILMN_1809027	ATP5SL	0	0	0	3
ILMN_1697694	ATP6AP1	0	0	0	3
ILMN_1677440	ATP6AP2	0	0	0	3
ILMN_1752579	ATP6V0A1	0	0	0	3
ILMN_1700380	ATP6V0A2	0	0	0	3
ILMN_1721391	ATP6V0B	0	0	0	3
ILMN_2353642	ATP6V0B	0	0	0	3
ILMN_1773849	ATP6V0C	0	0	0	3
ILMN_1789005	ATP6V0C	0	0	0	3
ILMN_1795826	ATP6V0D1	0	0	0	3
ILMN_1715635	ATP6V0E1	0	0	0	3
ILMN_2071937	ATP6V0E1	0	0	0	3
ILMN_1785095	ATP6V0E2	0	0	0	3
ILMN_1711516	ATP6V1A	0	0	0	3
ILMN_1787705	ATP6V1B2	0	0	0	3
ILMN_1659801	ATP6V1C1	0	0	0	3
ILMN_1797310	ATP6V1D	0	0	0	3
ILMN_2339779	ATP6V1E1	0	0	0	3
ILMN_1798485	ATP6V1E1	0	0	0	3
ILMN_1810235	ATP6V1E2	0.0025974	0.0025974	0	3
ILMN_2099783	ATP6V1F	0	0	0	3
ILMN_1784523	ATP6V1G1	0	0	0	3
ILMN_1654541	ATP6V1G2	0	0	0	3
ILMN_2403730	ATP6V1H	0	0	0	3
ILMN_1782057	ATP8B2	0	0	0	3
ILMN_2089073	ATP9A	0	0	0	3
ILMN_1658684	ATP9B	0.0363636	0.00519481	0	3
ILMN_1790603	ATPAF1	0	0	0	3
ILMN_2395055	ATPAF1	0	0	0	3
ILMN_1727390	ATPAF2	0.0012987	0.0012987	0	3
ILMN_1721741	ATPBD1B	0	0	0	3
ILMN_1682375	ATPBD3	0.0298701	0.00519481	0.0467533	3
ILMN_2140207	ATPBD4	0	0	0	3
ILMN_1782085	ATPBD4	0	0	0	3
ILMN_1727332	ATPIF1	0	0	0	3
ILMN_1685978	ATPIF1	0	0	0	3
ILMN_2370464	ATRIP	0	0	0	3
ILMN_1653896	ATRIP	0	0	0	3
ILMN_2355586	ATRN	0.0025974	0	0	3
ILMN_1761850	ATRN	0	0	0	3
ILMN_1772124	ATRN	0	0	0	3
ILMN_1800951	ATXN1	0	0	0	3
ILMN_2153332	ATXN1	0	0	0	3
ILMN_1705900	ATXN10	0	0	0	3
ILMN_2169676	ATXN10	0	0	0	3
ILMN_3233871	ATXN1L	0	0	0	3
ILMN_1743829	ATXN2	0	0	0	3
ILMN_2393497	ATXN3	0	0	0	3
ILMN_1664177	ATXN7L2	0.0038961	0.0337662	0.0012987	3
ILMN_1862018	ATXN7L3	0	0	0	3
ILMN_2231911	AUH	0.0012987	0.0025974	0.00519481	3
ILMN_1651378	AUP1	0	0	0	3
ILMN_1680955	AURKA	0	0	0	3
ILMN_2357438	AURKA	0	0	0	3
ILMN_1768396	AURKAIP1	0	0	0	3
ILMN_1684217	AURKB	0	0	0	3
ILMN_1749081	AUTS2	0	0	0	3
ILMN_1710216	AVEN	0	0	0	3
ILMN_3237977	AVL9	0.0142857	0.0168831	0	3
ILMN_1722292	AVL9	0.0168831	0.00519481	0.0207792	3
ILMN_1811443	AVP	0.0168831	0.025974	0.00519481	3
ILMN_1671731	AVPI1	0	0	0	3
ILMN_1698324	AVPR2	0.00519481	0.00519481	0	3
ILMN_1766185	AXIN1	0	0	0	3
ILMN_1724480	AXIN2	0	0	0	3
ILMN_1701877	AXL	0	0	0	3
ILMN_2364521	AXL	0	0	0	3
ILMN_1703123	AXUD1	0	0	0	3
ILMN_1754400	AYP1p1	0	0	0	3
ILMN_1746206	AZI1	0	0	0	3
ILMN_1733680	AZI2	0	0	0	3
ILMN_1656682	AZIN1	0	0	0	3
ILMN_2327994	AZIN1	0	0	0	3
ILMN_2148459	B2M	0	0	0	3
ILMN_1725427	B2M	0	0	0	3
ILMN_1780188	B3GALNT2	0.00519481	0.0233766	0.00519481	3
ILMN_1709907	B3GALT2	0.00519481	0.0168831	0.00909091	3
ILMN_1739749	B3GALT6	0	0	0	3
ILMN_2371440	B3GAT1	0	0	0	3
ILMN_1761093	B3GAT1	0	0	0	3
ILMN_2210581	B3GAT3	0.0025974	0.0415584	0.012987	3
ILMN_3246214	B3GNT1	0	0	0	3
ILMN_1702609	B3GNT5	0.0142857	0.0155844	0	3
ILMN_1715384	B3GNT6	0	0	0	3
ILMN_1680081	B3Gn-T6	0.0155844	0.0233766	0.00649351	3
ILMN_1702817	B3GNTL1	0.0142857	0.0233766	0.0181818	3
ILMN_1805725	B4GALNT1	0	0	0	3
ILMN_1796663	B4GALNT4	0	0	0	3
ILMN_1766221	B4GALT1	0.00909091	0.0038961	0	3
ILMN_1753755	B4GALT2	0	0	0	3
ILMN_1692267	B4GALT3	0	0	0	3
ILMN_1661500	B4GALT4	0	0	0	3
ILMN_2380688	B4GALT4	0.00909091	0.0168831	0.0181818	3
ILMN_1685824	B4GALT5	0	0	0	3
ILMN_1663541	B4GALT7	0	0	0	3
ILMN_3239284	B9D1	0	0	0	3
ILMN_1806999	B9D2	0	0	0	3
ILMN_1687751	BAALC	0	0	0	3
ILMN_1707717	BAALC	0	0	0	3
ILMN_2320349	BACE1	0	0	0	3
ILMN_1797804	BACE1	0.0012987	0	0	3
ILMN_2326712	BACE2	0.00649351	0.0116883	0.038961	3
ILMN_1669323	BACE2	0	0	0	3
ILMN_1670695	BACH2	0	0	0	3
ILMN_2058468	BACH2	0	0	0	3
ILMN_1738652	BAD	0	0	0	3
ILMN_3244893	BAG2	0.0012987	0	0	3
ILMN_1659766	BAG3	0	0	0	3
ILMN_2221014	BAG4	0.0012987	0.0168831	0.0168831	3
ILMN_1727996	BAG4	0.0142857	0.0116883	0.038961	3
ILMN_2361695	BAG5	0	0	0	3
ILMN_1728514	BAG5	0	0	0	3
ILMN_1739256	BAHD1	0.0012987	0	0	3
ILMN_1729529	BAI1	0	0.0025974	0.0168831	3
ILMN_1773109	BAI2	0	0	0	3
ILMN_1671076	BAI3	0	0	0	3
ILMN_1705922	BAIAP2	0	0	0	3
ILMN_1699727	BAIAP2	0	0	0	3
ILMN_2258749	BAIAP2	0	0	0	3
ILMN_1805990	BAK1	0.0012987	0.0038961	0.00909091	3
ILMN_1691410	BAMBI	0	0	0	3
ILMN_2179837	BANF1	0	0	0	3
ILMN_1749243	BANF1	0	0.0025974	0.00519481	3
ILMN_1663631	BANP	0	0	0	3
ILMN_1701216	BANP	0.0012987	0.0038961	0	3
ILMN_1768363	BAP1	0	0	0	3
ILMN_1782004	BAPX1	0.0012987	0	0	3
ILMN_2074258	BARD1	0	0	0	3
ILMN_1651826	BASP1	0	0	0	3
ILMN_1686626	BAT1	0	0	0	3
ILMN_1760563	BAT2	0	0	0	3
ILMN_2408179	BAT2	0	0	0	3
ILMN_1743137	BAT2D1	0	0	0	3
ILMN_3247802	BAT2L	0	0	0	3
ILMN_1705364	BAT3	0	0	0	3
ILMN_2390416	BAT3	0	0	0	3
ILMN_1742782	BAT4	0.0025974	0.0324675	0.0181818	3
ILMN_2152402	BAT5	0	0	0	3
ILMN_1763207	BATF3	0	0	0	3
ILMN_2321064	BAX	0	0	0	3
ILMN_1683300	BAX	0	0	0	3
ILMN_1742230	BAZ1A	0	0	0	3
ILMN_1680831	BAZ1B	0	0	0	3
ILMN_1720850	BAZ2B	0	0	0	3
ILMN_1729645	BBC3	0.0025974	0.00519481	0.00519481	3
ILMN_1734929	BBOX1	0	0	0	3
ILMN_1800590	BBS1	0	0	0	3
ILMN_1741985	BBS10	0	0	0	3
ILMN_2166972	BBS12	0.0025974	0.0194805	0.0285714	3
ILMN_2230035	BBS2	0	0	0	3
ILMN_1767612	BBS2	0	0	0	3
ILMN_1762466	BBS4	0	0	0	3
ILMN_1703111	BBS7	0.0155844	0.00649351	0.0181818	3
ILMN_1776656	BBS7	0.0012987	0	0	3
ILMN_1775012	BBS7	0	0	0	3
ILMN_2257833	BBS7	0	0	0	3
ILMN_1794956	BBS9	0	0	0	3
ILMN_1745415	BBX	0.0012987	0	0	3
ILMN_2246131	BCAN	0	0	0	3
ILMN_1680300	BCAN	0.0142857	0.0038961	0.0415584	3
ILMN_1732154	BCAN	0	0	0	3
ILMN_1697642	BCAP29	0	0	0	3
ILMN_2342084	BCAP29	0	0	0	3
ILMN_1737380	BCAP29	0	0	0	3
ILMN_1812403	BCAP31	0	0	0	3
ILMN_1672596	BCAR1	0	0	0	3
ILMN_1763638	BCAR3	0	0	0	3
ILMN_1751760	BCAS2	0.00519481	0	0	3
ILMN_2148452	BCAS2	0.0142857	0.0025974	0.0012987	3
ILMN_1808059	BCAS4	0	0	0	3
ILMN_2325506	BCAS4	0	0	0	3
ILMN_1766169	BCAT1	0	0	0	3
ILMN_1695110	BCAT2	0	0	0	3
ILMN_1771966	BCCIP	0	0	0	3
ILMN_1811188	BCCIP	0	0	0	3
ILMN_1786433	BCCIP	0	0	0	3
ILMN_1758090	BCCIP	0	0	0	3
ILMN_1796113	BCDIN3D	0	0	0	3
ILMN_2176592	BCHE	0	0	0	3
ILMN_1685641	BCHE	0	0	0	3
ILMN_1735979	BCKDHA	0	0	0	3
ILMN_1764166	BCKDHB	0	0	0	3
ILMN_1655433	BCKDHB	0.0025974	0.0025974	0	3
ILMN_1693394	BCKDK	0	0	0	3
ILMN_2255133	BCL11A	0.00519481	0.012987	0.0103896	3
ILMN_1752899	BCL11A	0.0012987	0	0	3
ILMN_1665761	BCL11B	0	0	0	3
ILMN_1801119	BCL2	0	0	0	3
ILMN_2246956	BCL2	0	0	0	3
ILMN_1654118	BCL2L1	0	0	0	3
ILMN_2359627	BCL2L11	0.0415584	0.0168831	0.0012987	3
ILMN_2396982	BCL2L12	0	0	0	3
ILMN_1752953	BCL2L12	0	0	0	3
ILMN_2181445	BCL2L13	0	0	0	3
ILMN_1746561	BCL2L2	0	0	0	3
ILMN_1737314	BCL6	0	0	0	3
ILMN_1706886	BCL7A	0.0025974	0.0025974	0	3
ILMN_1754199	BCL7B	0	0	0	3
ILMN_2367275	BCL7B	0	0	0	3
ILMN_2371147	BCL7C	0	0	0	3
ILMN_1701165	BCL7C	0.00519481	0.0025974	0	3
ILMN_1704452	BCL9	0	0	0	3
ILMN_1743966	BCL9L	0.0025974	0.0116883	0.0467533	3
ILMN_1775192	BCLAF1	0	0	0	3
ILMN_2357272	BCLAF1	0	0	0	3
ILMN_1773117	BCOR	0	0	0	3
ILMN_1670398	BCR	0.0298701	0.0272727	0.012987	3
ILMN_1738529	BCS1L	0	0	0	3
ILMN_1678757	BCYRN1	0	0	0	3
ILMN_1751276	BDNF	0	0	0	3
ILMN_1744822	BECN1	0	0	0	3
ILMN_2375032	BEND3	0	0	0	3
ILMN_3237448	BEND5	0	0	0	3
ILMN_3238319	BEND6	0.0233766	0.00519481	0.00519481	3
ILMN_1706969	BEND6	0	0	0	3
ILMN_3230880	BEND7	0	0	0	3
ILMN_1684042	BET1	0	0	0	3
ILMN_1702637	BEX1	0	0	0	3
ILMN_2234697	BEX1	0	0	0	3
ILMN_2181892	BEX2	0	0	0	3
ILMN_2351638	BEX4	0	0	0	3
ILMN_1804798	BEXL1	0	0	0	3
ILMN_1814808	BFAR	0	0	0	3
ILMN_1768534	BHLHB2	0	0	0	3
ILMN_1726809	BHLHB3	0	0	0	3
ILMN_1708131	BHLHB9	0.0155844	0.025974	0.00519481	3
ILMN_2362034	BICD1	0.0025974	0.0012987	0	3
ILMN_2380418	BICD2	0	0	0	3
ILMN_2372413	BID	0	0	0	3
ILMN_1763386	BID	0	0	0	3
ILMN_2309245	BIN1	0	0	0	3
ILMN_1674160	BIN1	0	0	0	3
ILMN_1708485	BIN3	0.0142857	0.0233766	0.00649351	3
ILMN_2182704	BIRC2	0	0	0	3
ILMN_1768194	BIRC2	0	0	0.0012987	3
ILMN_2405684	BIRC3	0	0	0	3
ILMN_2349459	BIRC5	0	0	0	3
ILMN_1801605	BIRC6	0	0	0	3
ILMN_1805826	BIVM	0	0	0	3
ILMN_2214098	BIVM	0	0	0	3
ILMN_1675612	BLCAP	0	0	0	3
ILMN_1709484	BLM	0	0	0	3
ILMN_1721921	BLMH	0	0	0	3
ILMN_2157510	BLOC1S1	0	0	0	3
ILMN_1679782	BLOC1S2	0	0	0	3
ILMN_1691436	BLVRA	0	0	0	3
ILMN_1797793	BLVRB	0.0142857	0.0103896	0	3
ILMN_2106656	BLZF1	0.0376623	0.00519481	0.00519481	3
ILMN_2106658	BLZF1	0	0	0	3
ILMN_1700915	BMI1	0	0	0	3
ILMN_1800412	BMP1	0	0	0	3
ILMN_1740900	BMP4	0.0142857	0.0376623	0.0103896	3
ILMN_1741566	BMP7	0	0	0	3
ILMN_2123415	BMP8B	0.00779221	0	0	3
ILMN_1706957	BMPR1A	0	0	0	3
ILMN_2070896	BMPR2	0	0	0	3
ILMN_1789095	BMPR2	0	0	0	3
ILMN_1772713	BMS1	0	0	0	3
ILMN_3238183	BMS1P5	0	0	0	3
ILMN_1734410	BNIP1	0	0.0012987	0	3
ILMN_2318733	BNIP1	0	0	0	3
ILMN_1770803	BNIP2	0	0	0	3
ILMN_1724658	BNIP3	0	0	0	3
ILMN_2045419	BNIP3L	0	0	0	3
ILMN_1718961	BNIP3L	0	0	0	3
ILMN_1803956	BOC	0	0.0012987	0	3
ILMN_1730032	BOK	0	0	0	3
ILMN_1793966	BOLA1	0.00649351	0.0233766	0	3
ILMN_1782633	BOLA2	0	0	0	3
ILMN_2298511	BOLA2	0	0	0	3
ILMN_1659343	BOLA2	0	0	0	3
ILMN_1810680	BOLA2	0	0	0	3
ILMN_1786658	BOLA3	0	0	0	3
ILMN_2343010	BOLA3	0	0	0	3
ILMN_1715583	BOP1	0	0	0	3
ILMN_2147920	BP75	0.0025974	0	0.0025974	3
ILMN_2352921	BPGM	0	0	0	3
ILMN_1657746	BPHL	0	0	0	3
ILMN_1712718	BPNT1	0.0155844	0.00519481	0.0142857	3
ILMN_2311089	BRCA1	0	0	0	3
ILMN_1738027	BRCA1	0	0	0	3
ILMN_1697546	BRCC3	0	0	0	3
ILMN_1730019	BRD1	0	0.0012987	0	3
ILMN_1758918	BRD2	0	0	0	3
ILMN_1785635	BRD3	0	0	0	3
ILMN_1696420	BRD7	0	0	0	3
ILMN_2082810	BRD7	0	0	0	3
ILMN_3262031	BRD7P2	0	0	0	3
ILMN_2349600	BRD8	0	0	0	3
ILMN_1701711	BRD8	0	0	0	3
ILMN_1651405	BRD9	0	0	0	3
ILMN_2363489	BRE	0	0	0	3
ILMN_1778684	BRE	0	0	0	3
ILMN_1703686	BRF1	0.0142857	0.0168831	0.0337662	3
ILMN_1665554	BRF2	0	0	0	3
ILMN_1781580	BRI3	0	0	0	3
ILMN_1797693	BRI3BP	0	0	0	3
ILMN_1803570	BRI3BP	0.0168831	0.0168831	0.00519481	3
ILMN_1800619	BRI3BP	0	0	0	3
ILMN_1693410	BRI3BP	0	0	0	3
ILMN_3253304	BRI3P1	0	0	0	3
ILMN_1760757	BRIP1	0.0168831	0.0285714	0	3
ILMN_2155172	BRIX1	0	0	0	3
ILMN_1679800	BRIX1	0	0	0	3
ILMN_2398432	BRMS1	0	0	0	3
ILMN_1719165	BRMS1	0	0	0	3
ILMN_1775943	BRMS1L	0	0	0	3
ILMN_1727813	BRP44	0	0	0	3
ILMN_1666967	BRP44L	0	0	0	3
ILMN_2226324	BRP44L	0	0	0	3
ILMN_1669308	BRPF1	0	0.0012987	0	3
ILMN_2365549	BRPF1	0	0	0	3
ILMN_1658800	BRPF3	0	0	0	3
ILMN_2185845	BRSK1	0	0	0	3
ILMN_1708496	BRSK2	0.0012987	0.0038961	0	3
ILMN_1805111	BRWD1	0	0.0012987	0	3
ILMN_1673518	BRWD1	0	0	0	3
ILMN_1662896	BRWD2	0	0	0	3
ILMN_1774596	BSCL2	0	0	0	3
ILMN_1734483	BSDC1	0	0	0	3
ILMN_1778374	BSG	0	0	0	3
ILMN_1760246	BSN	0	0	0	3
ILMN_1676842	BTAF1	0	0	0	3
ILMN_2411264	BTBD1	0	0	0	3
ILMN_1691927	BTBD1	0	0	0.00519481	3
ILMN_1809344	BTBD10	0	0	0	3
ILMN_1705066	BTBD11	0	0	0	3
ILMN_1732885	BTBD12	0	0	0	3
ILMN_1707481	BTBD15	0.00519481	0	0.00519481	3
ILMN_2286987	BTBD17	0	0	0	3
ILMN_3238274	BTBD2	0	0	0	3
ILMN_1713964	BTBD3	0	0	0	3
ILMN_2334350	BTBD3	0	0	0	3
ILMN_1744725	BTBD6	0	0	0	3
ILMN_1687743	BTBD7	0	0	0	3
ILMN_1757298	BTBD7	0	0	0	3
ILMN_2319414	BTF3	0	0	0	3
ILMN_1659762	BTF3	0	0	0	3
ILMN_2245676	BTF3	0	0	0	3
ILMN_3309354	BTF3L1	0.0181818	0.0194805	0.0220779	3
ILMN_2072140	BTF3L4	0	0	0	3
ILMN_1759359	BTF3L4	0	0	0	3
ILMN_1775743	BTG1	0	0	0	3
ILMN_1770085	BTG2	0	0	0	3
ILMN_1707339	BTG3	0	0	0	3
ILMN_2154836	BTG3	0	0	0	3
ILMN_2364852	BTN2A1	0	0	0	3
ILMN_1752758	BTN2A2	0.0038961	0.0025974	0	3
ILMN_1700067	BTN3A2	0.0181818	0.0324675	0.00909091	3
ILMN_1815718	BTRC	0	0	0	3
ILMN_2202948	BUB1	0	0	0	3
ILMN_1797307	BUB1B	0	0	0	3
ILMN_1693145	BUB3	0	0	0	3
ILMN_1778764	BUB3	0	0	0	3
ILMN_2386100	BUB3	0	0	0	3
ILMN_1749210	BUD13	0	0	0	3
ILMN_1710697	BUD31	0	0	0	3
ILMN_1689237	BVES	0	0	0	3
ILMN_1682792	BYSL	0	0	0	3
ILMN_1704760	BZW1	0.00519481	0	0	3
ILMN_1717982	BZW1	0	0	0	3
ILMN_1676548	BZW2	0	0	0	3
ILMN_1767556	C10orf10	0.0311688	0.0220779	0	3
ILMN_1738955	C10orf104	0	0	0	3
ILMN_1770399	C10orf107	0.00779221	0.00649351	0	3
ILMN_1761411	C10orf119	0	0	0	3
ILMN_1704785	C10orf125	0	0	0	3
ILMN_1674046	C10orf128	0.0025974	0.00519481	0.00519481	3
ILMN_1791656	C10orf137	0	0	0	3
ILMN_3239861	C10orf140	0.0025974	0.0025974	0	3
ILMN_2071682	C10orf141	0	0	0	3
ILMN_1730047	C10orf141	0.0181818	0	0	3
ILMN_1701243	C10orf2	0	0	0	3
ILMN_1658830	C10orf26	0	0	0	3
ILMN_2158594	C10orf28	0	0	0	3
ILMN_1772706	C10orf32	0	0	0	3
ILMN_2151056	C10orf32	0	0	0	3
ILMN_1684497	C10orf33	0.0025974	0.0181818	0.0181818	3
ILMN_1662470	C10orf35	0	0	0	3
ILMN_2375141	C10orf4	0.0038961	0.0025974	0.0012987	3
ILMN_1765480	C10orf4	0.0142857	0.00649351	0.0038961	3
ILMN_1672717	C10orf57	0	0	0	3
ILMN_2118472	C10orf58	0	0	0	3
ILMN_1754538	C10orf58	0	0	0	3
ILMN_1710207	C10orf6	0	0	0	3
ILMN_1678652	C10orf61	0	0	0	3
ILMN_1768077	C10orf61	0	0	0	3
ILMN_3192411	C10orf75	0.0025974	0.0012987	0	3
ILMN_3268880	C10orf75	0.00779221	0.0012987	0	3
ILMN_1792110	C10orf76	0	0	0	3
ILMN_2301163	C10orf78	0.00909091	0.0233766	0.0181818	3
ILMN_1671905	C10orf78	0	0	0	3
ILMN_2101719	C10orf84	0.0012987	0	0	3
ILMN_1775423	C10orf88	0.0012987	0	0	3
ILMN_1680367	C10orf90	0	0	0	3
ILMN_2128967	C11orf1	0	0	0	3
ILMN_1786759	C11orf10	0	0	0	3
ILMN_1788356	C11orf17	0	0	0	3
ILMN_2359029	C11orf17	0	0	0	3
ILMN_1752988	C11orf17	0	0	0	3
ILMN_2077094	C11orf2	0	0	0	3
ILMN_1808163	C11orf24	0	0	0	3
ILMN_1786872	C11orf31	0.0012987	0.0012987	0	3
ILMN_3306978	C11orf36	0.0142857	0.0233766	0.0103896	3
ILMN_1653836	C11orf41	0	0	0	3
ILMN_1767642	C11orf46	0	0	0	3
ILMN_1739345	C11orf48	0	0	0	3
ILMN_1664773	C11orf49	0	0	0.00779221	3
ILMN_2341487	C11orf49	0	0	0	3
ILMN_1726104	C11orf51	0	0	0	3
ILMN_2213297	C11orf54	0	0	0	3
ILMN_1664738	C11orf54	0.00519481	0.00519481	0.0103896	3
ILMN_1728965	C11orf57	0	0	0	3
ILMN_1802649	C11orf58	0	0	0	3
ILMN_3249949	C11orf58	0	0	0	3
ILMN_3250798	C11orf58	0.0142857	0.012987	0.0181818	3
ILMN_1815878	C11orf59	0	0	0	3
ILMN_1677080	C11orf60	0	0	0	3
ILMN_2073263	C11orf61	0.0207792	0.00519481	0.00519481	3
ILMN_1773148	C11orf61	0.00909091	0	0	3
ILMN_2243516	C11orf63	0	0	0	3
ILMN_1680659	C11orf63	0.00779221	0.0025974	0	3
ILMN_1779163	C11orf67	0	0	0	3
ILMN_1757847	C11orf68	0	0	0	3
ILMN_2168520	C11orf70	0	0	0	3
ILMN_1683635	C11orf70	0	0	0	3
ILMN_2049693	C11orf71	0.0012987	0	0	3
ILMN_1781419	C11orf73	0	0	0	3
ILMN_1656463	C11orf73	0	0	0	3
ILMN_1659017	C11orf74	0	0	0	3
ILMN_1790637	C11orf80	0	0	0	3
ILMN_1790100	C11orf82	0	0	0	3
ILMN_3240370	C11orf83	0	0	0	3
ILMN_1810376	C11orf87	0	0	0	3
ILMN_1777765	C12orf10	0	0	0	3
ILMN_2196335	C12orf11	0.0012987	0	0	3
ILMN_2196337	C12orf11	0	0	0	3
ILMN_1804611	C12orf23	0	0	0	3
ILMN_2180371	C12orf24	0	0	0	3
ILMN_1745497	C12orf26	0.012987	0.00909091	0.00519481	3
ILMN_1792671	C12orf29	0	0	0	3
ILMN_1788810	C12orf30	0	0	0	3
ILMN_2122176	C12orf31	0	0	0	3
ILMN_2105923	C12orf32	0	0	0	3
ILMN_1772446	C12orf34	0	0	0	3
ILMN_2229922	C12orf35	0	0	0	3
ILMN_1726289	C12orf35	0.0025974	0.0012987	0.0012987	3
ILMN_1751898	C12orf4	0	0	0	3
ILMN_1713189	C12orf41	0	0	0	3
ILMN_1737818	C12orf43	0	0	0	3
ILMN_2169856	C12orf43	0	0	0	3
ILMN_1772527	C12orf44	0	0	0	3
ILMN_1728435	C12orf45	0	0	0	3
ILMN_1798957	C12orf47	0	0	0	3
ILMN_1727055	C12orf48	0	0	0	3
ILMN_2161556	C12orf49	0.0012987	0	0	3
ILMN_1791792	C12orf5	0	0	0	3
ILMN_3244516	C12orf51	0	0	0	3
ILMN_1667857	C12orf52	0	0	0	3
ILMN_1706186	C12orf53	0.0246753	0.0324675	0.00519481	3
ILMN_1812191	C12orf57	0	0	0	3
ILMN_1804656	C12orf62	0	0	0	3
ILMN_1667510	C12orf65	0	0	0	3
ILMN_1736995	C12orf66	0.00779221	0.0194805	0	3
ILMN_3245006	C12orf68	0	0	0	3
ILMN_3241041	C12orf73	0.00519481	0.00519481	0.0168831	3
ILMN_2152429	C12orf76	0	0	0	3
ILMN_1753265	C12orf76	0	0	0	3
ILMN_2223350	C13orf1	0	0	0	3
ILMN_2391551	C13orf23	0	0	0	3
ILMN_1795128	C13orf23	0	0	0	3
ILMN_1682774	C13orf27	0	0	0	3
ILMN_1736816	C13orf3	0	0	0	3
ILMN_1761486	C13orf34	0.0207792	0.0025974	0.0038961	3
ILMN_3246728	C13orf36	0	0	0	3
ILMN_3243945	C13orf37	0	0	0	3
ILMN_1755882	C13orf7	0	0.0025974	0	3
ILMN_1700276	C14orf100	0	0	0	3
ILMN_2374076	C14orf102	0	0	0	3
ILMN_1769757	C14orf104	0	0	0	3
ILMN_1666208	C14orf106	0	0	0	3
ILMN_3269775	C14orf109	0	0	0	3
ILMN_3193306	C14orf109	0	0	0	3
ILMN_1706305	C14orf112	0	0	0	3
ILMN_1771629	C14orf124	0	0	0	3
ILMN_1692588	C14orf125	0.0142857	0.00649351	0.00909091	3
ILMN_1712748	C14orf129	0	0	0	3
ILMN_2181883	C14orf129	0	0	0	3
ILMN_2186858	C14orf131	0	0	0	3
ILMN_1713744	C14orf132	0	0	0	3
ILMN_1734440	C14orf133	0	0	0	3
ILMN_2111918	C14orf135	0	0	0	3
ILMN_1680781	C14orf135	0	0	0	3
ILMN_1781102	C14orf138	0.0038961	0.0038961	0.00909091	3
ILMN_2394193	C14orf138	0.0025974	0.0012987	0.0012987	3
ILMN_1685781	C14orf142	0	0	0	3
ILMN_2193315	C14orf143	0	0	0	3
ILMN_1806825	C14orf145	0.00519481	0.0155844	0.0103896	3
ILMN_1699676	C14orf147	0	0	0	3
ILMN_2053281	C14orf149	0	0	0	3
ILMN_1667374	C14orf149	0	0	0	3
ILMN_2078724	C14orf153	0	0	0	3
ILMN_1661945	C14orf156	0	0	0	3
ILMN_1721106	C14orf159	0	0	0	3
ILMN_1696708	C14orf166	0	0	0	3
ILMN_3261811	C14orf167	0	0	0	3
ILMN_3187771	C14orf167	0	0	0	3
ILMN_1711543	C14orf169	0	0	0	3
ILMN_2393450	C14orf173	0	0	0	3
ILMN_3243606	C14orf174	0.0025974	0.0025974	0	3
ILMN_1756877	C14orf179	0	0	0	3
ILMN_2157709	C14orf19	0.00649351	0.00649351	0.00649351	3
ILMN_1652722	C14orf2	0	0	0	3
ILMN_1779279	C14orf32	0	0	0	3
ILMN_1796377	C14orf37	0	0	0	3
ILMN_2138745	C14orf37	0	0	0	3
ILMN_1804396	C14orf4	0	0	0	3
ILMN_2412922	C14orf43	0	0	0	3
ILMN_1763091	C14orf43	0	0	0	3
ILMN_1806456	C14orf45	0	0	0	3
ILMN_1658628	C14orf72	0.0298701	0.038961	0.0220779	3
ILMN_1657111	C14orf78	0	0	0	3
ILMN_1686082	C14orf79	0	0	0	3
ILMN_1653553	C14orf80	0	0	0	3
ILMN_1690443	C14orf82	0	0	0	3
ILMN_2134381	C14orf85	0	0	0	3
ILMN_1724897	C14orf93	0	0	0	3
ILMN_1657744	C15orf17	0	0	0	3
ILMN_1696031	C15orf21	0	0.0025974	0	3
ILMN_1652008	C15orf23	0	0	0	3
ILMN_2141807	C15orf23	0	0	0	3
ILMN_2150000	C15orf24	0	0	0	3
ILMN_1739854	C15orf29	0	0	0	3
ILMN_3268535	C15orf34	0.0363636	0.0233766	0.00519481	3
ILMN_2189406	C15orf38	0	0	0	3
ILMN_1793729	C15orf39	0.0012987	0.0350649	0.0233766	3
ILMN_1660585	C15orf40	0.0025974	0.00519481	0	3
ILMN_1747217	C15orf41	0.00779221	0.0116883	0.00519481	3
ILMN_1771326	C15orf44	0	0.0025974	0	3
ILMN_2268026	C15orf44	0	0	0	3
ILMN_1795524	C15orf44	0	0	0	3
ILMN_1805410	C15orf48	0.0012987	0.00519481	0	3
ILMN_1775330	C15orf52	0	0	0	3
ILMN_2413318	C15orf57	0	0	0	3
ILMN_1811264	C15orf57	0	0	0	3
ILMN_2141118	C15orf59	0	0	0	3
ILMN_3248556	C15orf62	0.0012987	0	0	3
ILMN_1663484	C15orf63	0.00519481	0.0025974	0.00649351	3
ILMN_2073543	C15orf63	0	0	0	3
ILMN_1774990	C16orf13	0	0	0	3
ILMN_2369826	C16orf13	0	0	0	3
ILMN_1801118	C16orf33	0	0	0	3
ILMN_2369580	C16orf35	0	0	0	3
ILMN_1733581	C16orf35	0.0012987	0.00649351	0.00519481	3
ILMN_1799100	C16orf38	0.0220779	0.0168831	0.0376623	3
ILMN_1713884	C16orf42	0	0	0	3
ILMN_1687821	C16orf45	0	0	0	3
ILMN_1787324	C16orf48	0	0	0	3
ILMN_1815812	C16orf5	0.0142857	0.0272727	0	3
ILMN_1717324	C16orf52	0.0155844	0.00519481	0.0467533	3
ILMN_2194828	C16orf53	0	0	0	3
ILMN_1727444	C16orf53	0	0	0	3
ILMN_1777129	C16orf56	0	0	0	3
ILMN_1765880	C16orf57	0	0	0	3
ILMN_1685289	C16orf58	0	0	0	3
ILMN_1656452	C16orf59	0	0	0	3
ILMN_1783333	C16orf61	0	0	0	3
ILMN_1729450	C16orf62	0.0012987	0	0	3
ILMN_1790650	C16orf63	0	0	0	3
ILMN_1658290	C16orf68	0	0	0	3
ILMN_1693630	C16orf7	0	0	0	3
ILMN_1711703	C16orf70	0.00649351	0.0272727	0.0220779	3
ILMN_1773407	C16orf72	0	0	0	3
ILMN_1790537	C16orf75	0	0	0	3
ILMN_2112599	C16orf80	0	0	0	3
ILMN_1690911	C16orf87	0	0	0	3
ILMN_1759325	C16orf91	0	0	0	3
ILMN_2179726	C16orf93	0	0	0	3
ILMN_3237452	C17orf100	0	0	0	3
ILMN_3195203	C17orf101	0	0	0	3
ILMN_1811991	C17orf101	0.0025974	0.0155844	0.0012987	3
ILMN_2388539	C17orf101	0	0.0012987	0	3
ILMN_1765923	C17orf101	0.0038961	0.00519481	0	3
ILMN_3239959	C17orf106	0.0012987	0.00649351	0.0181818	3
ILMN_1727078	C17orf37	0.0012987	0.00519481	0	3
ILMN_1783645	C17orf38	0.0155844	0.025974	0.0103896	3
ILMN_1656427	C17orf39	0.0012987	0.0025974	0	3
ILMN_2113016	C17orf39	0.00649351	0.0103896	0.0103896	3
ILMN_3307733	C17orf42	0	0	0	3
ILMN_1719224	C17orf45	0	0	0	3
ILMN_2075221	C17orf47	0.0025974	0.0155844	0.0103896	3
ILMN_1702526	C17orf48	0	0	0	3
ILMN_1763688	C17orf49	0	0	0	3
ILMN_1757693	C17orf51	0.0025974	0.0168831	0.00909091	3
ILMN_1776490	C17orf53	0	0	0	3
ILMN_2398926	C17orf58	0	0	0	3
ILMN_1700515	C17orf58	0	0	0	3
ILMN_1712985	C17orf58	0	0	0	3
ILMN_2201533	C17orf61	0	0	0	3
ILMN_1750401	C17orf62	0	0	0	3
ILMN_1812441	C17orf63	0	0	0	3
ILMN_1676731	C17orf65	0.0207792	0.0168831	0.038961	3
ILMN_1772296	C17orf68	0.0025974	0.0012987	0	3
ILMN_1755711	C17orf68	0	0	0	3
ILMN_1702676	C17orf68	0.0025974	0.00519481	0	3
ILMN_1711823	C17orf70	0	0	0	3
ILMN_1807533	C17orf71	0	0	0	3
ILMN_2221784	C17orf76	0.0324675	0.0025974	0.0415584	3
ILMN_1752947	C17orf79	0	0	0	3
ILMN_1762071	C17orf80	0	0	0	3
ILMN_1705414	C17orf81	0.0025974	0.00649351	0.00779221	3
ILMN_2341690	C17orf81	0	0	0	3
ILMN_1672554	C17orf81	0	0	0	3
ILMN_2221076	C17orf85	0	0	0	3
ILMN_3263062	C17orf88	0.0155844	0.00519481	0	3
ILMN_3245824	C17orf89	0	0	0	3
ILMN_2043615	C17orf90	0	0	0	3
ILMN_1805131	C17orf90	0	0	0	3
ILMN_2280731	C17orf95	0.0038961	0.0012987	0	3
ILMN_1688727	C17orf95	0.00779221	0.0181818	0.0246753	3
ILMN_2382724	C17orf95	0	0	0	3
ILMN_3247139	C17orf96	0	0.0025974	0	3
ILMN_1713803	C17orf97	0	0	0	3
ILMN_1707137	C17orf97	0	0	0	3
ILMN_1671693	C18orf10	0	0	0	3
ILMN_2207328	C18orf10	0	0	0	3
ILMN_1805998	C18orf21	0	0	0	3
ILMN_1736130	C18orf22	0	0.0025974	0	3
ILMN_1801822	C18orf25	0	0	0	3
ILMN_2196588	C18orf32	0	0	0	3
ILMN_1670718	C18orf51	0	0	0	3
ILMN_2173500	C18orf51	0	0	0	3
ILMN_2169089	C18orf54	0	0	0	3
ILMN_1716006	C18orf54	0	0	0	3
ILMN_1748916	C18orf55	0	0	0	3
ILMN_2182531	C18orf55	0	0	0	3
ILMN_1796074	C18orf56	0	0	0	3
ILMN_1719097	C18orf8	0	0	0	3
ILMN_1787844	C19orf10	0	0	0	3
ILMN_1703695	C19orf12	0	0	0	3
ILMN_1664920	C19orf12	0	0	0	3
ILMN_2406892	C19orf2	0	0	0	3
ILMN_1798728	C19orf2	0	0	0	3
ILMN_1808202	C19orf22	0	0	0	3
ILMN_1678052	C19orf24	0	0	0	3
ILMN_1655225	C19orf25	0.0142857	0.0337662	0.0103896	3
ILMN_2408796	C19orf28	0.0012987	0.00519481	0	3
ILMN_1813374	C19orf28	0	0	0	3
ILMN_2262462	C19orf29	0.0012987	0.00779221	0	3
ILMN_2350421	C19orf29	0.00649351	0.0168831	0.0025974	3
ILMN_1730818	C19orf30	0	0	0	3
ILMN_2233279	C19orf31	0	0	0	3
ILMN_1730945	C19orf4	0	0	0	3
ILMN_2173891	C19orf40	0	0	0	3
ILMN_1694759	C19orf42	0	0	0	3
ILMN_1784299	C19orf43	0	0	0	3
ILMN_3251733	C19orf43	0	0	0	3
ILMN_1801572	C19orf44	0.0025974	0	0	3
ILMN_2383484	C19orf48	0	0	0	3
ILMN_1759184	C19orf48	0	0	0	3
ILMN_1790951	C19orf50	0	0	0	3
ILMN_1726181	C19orf52	0	0	0	3
ILMN_1671374	C19orf53	0	0	0	3
ILMN_1729546	C19orf54	0.0012987	0	0	3
ILMN_1757914	C19orf56	0	0	0	3
ILMN_1703288	C19orf6	0	0	0	3
ILMN_2326282	C19orf6	0	0	0	3
ILMN_3268564	C19orf60	0	0	0	3
ILMN_3188110	C19orf60	0	0	0	3
ILMN_1737005	C19orf61	0	0	0	3
ILMN_2396813	C19orf62	0	0	0	3
ILMN_1806937	C19orf62	0	0	0	3
ILMN_1786707	C19orf63	0.00909091	0.0233766	0.00519481	3
ILMN_1750400	C19orf66	0.00519481	0.00519481	0.00519481	3
ILMN_1765684	C19orf70	0	0	0	3
ILMN_1662578	C1GALT1	0.0168831	0.0012987	0.0025974	3
ILMN_2401730	C1GALT1C1	0.0142857	0	0	3
ILMN_1751234	C1GALT1C1	0	0	0	3
ILMN_1658206	C1orf102	0	0	0	3
ILMN_1713952	C1orf106	0	0	0	3
ILMN_2089656	C1orf107	0	0	0	3
ILMN_2077886	C1orf109	0	0	0	3
ILMN_1727540	C1orf112	0	0	0	3
ILMN_1786273	C1orf122	0	0	0	3
ILMN_2082130	C1orf123	0	0	0	3
ILMN_1655485	C1orf124	0	0	0	3
ILMN_2371470	C1orf124	0	0	0	3
ILMN_1784207	C1orf128	0	0	0	3
ILMN_1805474	C1orf131	0	0	0	3
ILMN_3241665	C1orf133	0.00909091	0.012987	0.0220779	3
ILMN_1787280	C1orf135	0.0012987	0	0	3
ILMN_1707503	C1orf144	0	0	0	3
ILMN_2076940	C1orf149	0	0	0	3
ILMN_1657860	C1orf151	0.0376623	0.0350649	0.00519481	3
ILMN_1734915	C1orf156	0.0012987	0	0	3
ILMN_1672811	C1orf159	0.0025974	0.0454546	0.0246753	3
ILMN_1754894	C1orf162	0	0	0	3
ILMN_1757415	C1orf163	0	0	0	3
ILMN_1675024	C1orf165	0	0	0	3
ILMN_1675055	C1orf166	0	0	0	3
ILMN_1676322	C1orf172	0.0298701	0.0311688	0.038961	3
ILMN_3236244	C1orf174	0	0	0	3
ILMN_1797301	C1orf183	0.0012987	0.00649351	0.0233766	3
ILMN_1669123	C1orf187	0	0	0	3
ILMN_1790713	C1orf189	0.0181818	0.0116883	0.0415584	3
ILMN_1734486	C1orf19	0	0	0	3
ILMN_1742738	C1orf190	0	0	0	3
ILMN_1691299	C1orf192	0.0324675	0.0038961	0.0025974	3
ILMN_3251643	C1orf194	0	0	0	3
ILMN_1657683	C1orf198	0	0	0	3
ILMN_3256801	C1orf203	0.00519481	0.0272727	0.0415584	3
ILMN_1797735	C1orf21	0	0	0	3
ILMN_2196232	C1orf210	0.00779221	0.012987	0	3
ILMN_1693226	C1orf212	0	0	0	3
ILMN_1659975	C1orf216	0	0	0	3
ILMN_1789436	C1orf218	0	0	0	3
ILMN_1666825	C1orf229	0.0246753	0.00519481	0.00909091	3
ILMN_1667966	C1orf24	0.0025974	0.0168831	0	3
ILMN_2193498	C1orf25	0.00519481	0.0025974	0	3
ILMN_1665300	C1orf25	0	0	0	3
ILMN_1692834	C1orf26	0.00779221	0.00519481	0.0012987	3
ILMN_1704222	C1orf27	0.0012987	0	0	3
ILMN_1681741	C1orf31	0	0	0	3
ILMN_1790202	C1orf35	0	0	0	3
ILMN_1681340	C1orf41	0	0	0	3
ILMN_1729509	C1orf43	0	0	0	3
ILMN_1660602	C1orf43	0	0	0	3
ILMN_1801941	C1orf50	0	0	0	3
ILMN_1742611	C1orf52	0	0	0	3
ILMN_1661595	C1orf53	0	0.0012987	0	3
ILMN_1702231	C1orf54	0	0	0	3
ILMN_1748291	C1orf55	0	0	0	3
ILMN_1780268	C1orf56	0.0038961	0.00519481	0.0181818	3
ILMN_1657446	C1orf57	0	0	0	3
ILMN_1759652	C1orf61	0	0	0	3
ILMN_1749915	C1orf63	0	0	0	3
ILMN_1706413	C1orf66	0	0	0	3
ILMN_1657144	C1orf69	0.0181818	0.025974	0.038961	3
ILMN_1670263	C1orf71	0	0	0	3
ILMN_1786470	C1orf74	0	0	0	3
ILMN_1736234	C1orf77	0	0	0	3
ILMN_1673544	C1orf83	0.0155844	0.0025974	0.00519481	3
ILMN_1698243	C1orf85	0	0	0	3
ILMN_2097790	C1orf86	0	0	0	3
ILMN_1726989	C1orf86	0	0	0	3
ILMN_1761278	C1orf88	0.0025974	0.0233766	0.0103896	3
ILMN_2064237	C1orf88	0	0.00649351	0.00519481	3
ILMN_1742324	C1orf9	0	0	0	3
ILMN_1673752	C1orf91	0	0	0	3
ILMN_3243682	C1orf93	0	0	0	3
ILMN_1793263	C1orf94	0	0	0	3
ILMN_1699217	C1orf96	0.00649351	0	0	3
ILMN_2047354	C1orf97	0	0	0	3
ILMN_1808769	C1orf97	0	0	0	3
ILMN_1668996	C1QBP	0	0	0	3
ILMN_1716957	C1QL1	0	0	0	3
ILMN_1729288	C1QTNF6	0	0.0025974	0	3
ILMN_1781626	C1S	0.0142857	0.0194805	0.00519481	3
ILMN_2082209	C20orf100	0	0	0	3
ILMN_1713561	C20orf103	0.0038961	0.0025974	0	3
ILMN_1708016	C20orf108	0	0	0	3
ILMN_1755909	C20orf11	0	0	0	3
ILMN_2049727	C20orf111	0	0	0	3
ILMN_1693004	C20orf117	0	0	0	3
ILMN_1662640	C20orf127	0.0012987	0.0012987	0.00519481	3
ILMN_1718712	C20orf177	0.0038961	0	0.00519481	3
ILMN_2044027	C20orf191	0.00909091	0.00519481	0.0181818	3
ILMN_1689585	C20orf194	0.0025974	0.0012987	0	3
ILMN_1793002	C20orf196	0.0025974	0.0025974	0.0012987	3
ILMN_3188984	C20orf199	0	0	0	3
ILMN_1790136	C20orf20	0	0	0	3
ILMN_2387599	C20orf24	0	0	0	3
ILMN_1679195	C20orf24	0	0	0	3
ILMN_2283388	C20orf24	0	0	0	3
ILMN_1697363	C20orf27	0	0	0	3
ILMN_1785644	C20orf29	0	0	0	3
ILMN_1674394	C20orf3	0	0	0	3
ILMN_2404539	C20orf30	0	0	0	3
ILMN_1806312	C20orf30	0	0	0	3
ILMN_1721225	C20orf4	0	0	0	3
ILMN_1771815	C20orf43	0	0	0	3
ILMN_1728168	C20orf45	0	0	0	3
ILMN_1801633	C20orf52	0	0	0	3
ILMN_1782095	C20orf55	0.0012987	0.0038961	0.0012987	3
ILMN_1813344	C20orf7	0	0	0	3
ILMN_2350607	C20orf7	0	0	0	3
ILMN_2176251	C20orf72	0	0	0	3
ILMN_1697872	C21orf121	0.0012987	0	0	3
ILMN_1749424	C21orf122	0.00519481	0.0233766	0.0025974	3
ILMN_3177348	C21orf126	0.0012987	0.00519481	0.00519481	3
ILMN_1663893	C21orf128	0	0.0155844	0.0025974	3
ILMN_1758806	C21orf2	0	0	0	3
ILMN_2211724	C21orf24	0	0	0	3
ILMN_3178967	C21orf30	0.0012987	0	0.0025974	3
ILMN_1682812	C21orf33	0	0	0	3
ILMN_1737588	C21orf33	0	0	0	3
ILMN_2386205	C21orf33	0	0	0	3
ILMN_1690703	C21orf34	0	0	0	3
ILMN_1702226	C21orf34	0	0	0	3
ILMN_2283814	C21orf34	0.0142857	0.0025974	0	3
ILMN_1675632	C21orf37	0.0025974	0.0168831	0	3
ILMN_1712386	C21orf45	0	0	0	3
ILMN_2171183	C21orf45	0	0	0	3
ILMN_2356311	C21orf51	0	0	0	3
ILMN_2266005	C21orf51	0	0	0	3
ILMN_1777221	C21orf51	0	0.00519481	0	3
ILMN_1814204	C21orf55	0	0	0	3
ILMN_1716838	C21orf56	0	0	0	3
ILMN_2411127	C21orf57	0	0	0	3
ILMN_1656297	C21orf57	0	0	0	3
ILMN_1795836	C21orf57	0	0	0	3
ILMN_2310296	C21orf58	0.0337662	0.00909091	0.012987	3
ILMN_3307877	C21orf58	0	0	0	3
ILMN_1776147	C21orf59	0	0	0	3
ILMN_1814369	C21orf62	0	0	0	3
ILMN_1695959	C21orf63	0	0	0	3
ILMN_2251978	C21orf66	0	0	0	3
ILMN_1712936	C21orf66	0.00909091	0.0350649	0.00519481	3
ILMN_1808602	C21orf67	0.0142857	0.012987	0.00519481	3
ILMN_1772575	C21orf69	0.0012987	0.00649351	0	3
ILMN_1699071	C21orf7	0	0	0	3
ILMN_2104929	C21orf70	0	0	0.00909091	3
ILMN_2104924	C21orf70	0	0	0	3
ILMN_3246107	C21orf71	0	0	0	3
ILMN_2110496	C21orf91	0.00779221	0.00519481	0.0155844	3
ILMN_1698166	C21orf91	0.0155844	0.0155844	0.0025974	3
ILMN_1764410	C22orf13	0	0	0	3
ILMN_1721338	C22orf23	0.0246753	0.00649351	0.0181818	3
ILMN_1789405	C22orf25	0.0025974	0.0025974	0	3
ILMN_3196690	C22orf27	0	0	0.0181818	3
ILMN_1795991	C22orf28	0	0	0	3
ILMN_1759595	C22orf29	0.0012987	0	0	3
ILMN_3307887	C22orf30	0	0	0	3
ILMN_1741295	C22orf30	0.0363636	0.0025974	0.00909091	3
ILMN_1706859	C22orf32	0	0	0	3
ILMN_1663417	C22orf33	0.0285714	0.0376623	0.00909091	3
ILMN_1804884	C22orf39	0	0	0	3
ILMN_2325112	C22orf40	0	0.00519481	0	3
ILMN_1652512	C2CD2	0	0	0	3
ILMN_1812688	C2orf18	0	0	0	3
ILMN_1740308	C2orf21	0.0376623	0.0272727	0.0454546	3
ILMN_2073520	C2orf21	0.0142857	0.0025974	0.0155844	3
ILMN_1795419	C2orf24	0	0	0	3
ILMN_1810759	C2orf25	0	0	0	3
ILMN_2090558	C2orf25	0	0	0	3
ILMN_1774584	C2orf28	0	0	0	3
ILMN_2386016	C2orf28	0	0	0	3
ILMN_1708906	C2orf29	0	0	0	3
ILMN_1724376	C2orf30	0	0	0	3
ILMN_2182148	C2orf32	0	0	0	3
ILMN_1738099	C2orf34	0	0	0	3
ILMN_1804597	C2orf37	0.0168831	0.00649351	0.0025974	3
ILMN_1661594	C2orf42	0	0	0	3
ILMN_1660275	C2orf43	0	0	0	3
ILMN_1730631	C2orf44	0	0	0	3
ILMN_1795007	C2orf47	0	0	0	3
ILMN_1701131	C2orf49	0	0	0	3
ILMN_1722186	C2orf56	0	0	0	3
ILMN_1787370	C2orf56	0.0350649	0.0038961	0.00519481	3
ILMN_1805148	C2orf63	0.0038961	0.0025974	0.00519481	3
ILMN_1683065	C2orf64	0	0	0	3
ILMN_3247681	C2orf68	0	0	0	3
ILMN_3236377	C2orf69	0	0	0	3
ILMN_2229940	C2orf7	0	0	0	3
ILMN_1726729	C2orf76	0	0	0	3
ILMN_1655365	C2orf77	0.0025974	0.00519481	0	3
ILMN_1692707	C2orf79	0	0	0	3
ILMN_3240957	C2orf80	0	0	0	3
ILMN_1774265	C2orf82	0	0	0	3
ILMN_2193175	C3orf1	0.0012987	0	0	3
ILMN_1764500	C3orf10	0	0	0	3
ILMN_1761882	C3orf14	0	0	0	3
ILMN_2224486	C3orf14	0	0	0	3
ILMN_1676749	C3orf15	0	0	0	3
ILMN_2331658	C3orf17	0.0025974	0	0	3
ILMN_1728581	C3orf18	0.0012987	0.0025974	0.00519481	3
ILMN_1750144	C3orf19	0	0	0	3
ILMN_1671116	C3orf21	0	0	0	3
ILMN_1653228	C3orf22	0.00909091	0.0168831	0.0181818	3
ILMN_1754423	C3orf23	0.0012987	0	0	3
ILMN_1705753	C3orf26	0	0	0	3
ILMN_2215545	C3orf26	0	0	0	3
ILMN_1793724	C3orf31	0	0	0	3
ILMN_1713935	C3orf33	0.0025974	0.0025974	0	3
ILMN_1665217	C3orf34	0.00649351	0.0025974	0	3
ILMN_2288483	C3orf34	0	0	0	3
ILMN_1815682	C3orf37	0	0	0	3
ILMN_1697742	C3orf38	0	0	0	3
ILMN_2078264	C3orf38	0	0	0	3
ILMN_1792415	C3orf39	0	0	0	3
ILMN_3238618	C3orf50	0.0025974	0.00519481	0.0181818	3
ILMN_2184612	C3orf52	0.0025974	0.00519481	0.0012987	3
ILMN_1690454	C3orf54	0	0	0	3
ILMN_1797372	C3orf58	0	0	0	3
ILMN_1700967	C3orf59	0	0	0	3
ILMN_1691557	C3orf60	0	0	0	3
ILMN_1661409	C3orf63	0	0	0	3
ILMN_2136455	C3orf64	0.0155844	0.0025974	0.00909091	3
ILMN_1660519	C3orf70	0	0	0	3
ILMN_2135339	C3orf70	0	0	0	3
ILMN_3241169	C3orf75	0	0	0	3
ILMN_1708382	C3orf75	0	0	0	3
ILMN_1724990	C3orf75	0	0	0	3
ILMN_3247844	C4orf10	0.00909091	0.012987	0	3
ILMN_1665066	C4orf14	0	0	0	3
ILMN_1672124	C4orf18	0.00519481	0.0168831	0.038961	3
ILMN_1761941	C4orf18	0.00779221	0	0	3
ILMN_1798129	C4orf23	0.0012987	0	0	3
ILMN_1698677	C4orf27	0	0	0	3
ILMN_1812701	C4orf33	0	0	0	3
ILMN_2224907	C4orf34	0	0	0	3
ILMN_1713892	C4orf34	0	0	0	3
ILMN_1666827	C4orf41	0.0012987	0.0025974	0.00519481	3
ILMN_2338921	C4orf41	0	0	0	3
ILMN_1752086	C4orf41	0	0	0	3
ILMN_3249240	C4orf46	0	0	0	3
ILMN_3239531	C4orf48	0	0	0	3
ILMN_1746819	C5	0	0	0	3
ILMN_1680738	C5orf13	0	0	0	3
ILMN_1695917	C5orf15	0	0	0	3
ILMN_1654542	C5orf21	0	0	0	3
ILMN_1796595	C5orf22	0.0025974	0.00519481	0.00779221	3
ILMN_1743939	C5orf24	0	0	0	3
ILMN_1763326	C5orf25	0	0	0	3
ILMN_3253599	C5orf27	0.0012987	0.0116883	0.012987	3
ILMN_2150465	C5orf28	0	0	0	3
ILMN_1694798	C5orf28	0.0038961	0.0181818	0	3
ILMN_1677292	C5orf30	0	0	0	3
ILMN_1761566	C5orf32	0	0	0	3
ILMN_1698770	C5orf33	0	0	0	3
ILMN_1662184	C5orf34	0	0	0	3
ILMN_1757636	C5orf35	0	0	0	3
ILMN_2225577	C5orf37	0	0	0	3
ILMN_2098616	C5orf39	0	0	0	3
ILMN_1677303	C5orf42	0.0181818	0.012987	0.0103896	3
ILMN_1658439	C5orf44	0.00779221	0.00519481	0.025974	3
ILMN_1726930	C5orf44	0	0	0	3
ILMN_1673478	C5orf5	0	0	0	3
ILMN_3237850	C5orf51	0	0	0	3
ILMN_1783023	C5orf51	0	0	0	3
ILMN_1685854	C5orf53	0.00909091	0.00519481	0	3
ILMN_1727553	C5orf54	0	0	0	3
ILMN_1684368	C5orf62	0.0038961	0.0012987	0.00519481	3
ILMN_1691899	C6orf1	0.0454546	0.0350649	0.0298701	3
ILMN_2370685	C6orf1	0	0	0	3
ILMN_1704253	C6orf106	0	0.0025974	0	3
ILMN_2380588	C6orf108	0	0	0	3
ILMN_2161357	C6orf111	0	0	0	3
ILMN_1720858	C6orf115	0	0	0	3
ILMN_1794829	C6orf117	0	0	0	3
ILMN_1743187	C6orf120	0.00519481	0.0025974	0	3
ILMN_1790461	C6orf125	0	0	0	3
ILMN_1651987	C6orf129	0	0	0	3
ILMN_1804834	C6orf130	0	0	0	3
ILMN_1752476	C6orf134	0	0	0	3
ILMN_1813236	C6orf136	0	0	0	3
ILMN_1742467	C6orf138	0.0012987	0.0168831	0.0181818	3
ILMN_1761762	C6orf141	0	0	0	3
ILMN_1709026	C6orf145	0	0	0	3
ILMN_1815039	C6orf153	0	0	0	3
ILMN_1691668	C6orf154	0.0025974	0.0168831	0.00519481	3
ILMN_1666617	C6orf155	0.00519481	0.00519481	0.0025974	3
ILMN_1653794	C6orf160	0	0	0	3
ILMN_2413141	C6orf162	0	0	0	3
ILMN_1693323	C6orf162	0	0	0	3
ILMN_1757837	C6orf165	0.0038961	0.0025974	0	3
ILMN_1771746	C6orf165	0.0181818	0.0025974	0.0025974	3
ILMN_1783075	C6orf167	0.00649351	0.0194805	0	3
ILMN_1715096	C6orf168	0	0	0	3
ILMN_2228196	C6orf170	0	0	0	3
ILMN_1763907	C6orf173	0	0	0	3
ILMN_1669831	C6orf192	0	0	0	3
ILMN_1778951	C6orf203	0	0	0	3
ILMN_1798108	C6orf211	0	0	0	3
ILMN_2186678	C6orf211	0.0012987	0.0012987	0	3
ILMN_3248941	C6orf225	0.00519481	0	0.00519481	3
ILMN_1709799	C6orf25	0.00779221	0	0.0350649	3
ILMN_1795286	C6orf47	0	0	0	3
ILMN_2285708	C6orf48	0.0155844	0.0168831	0	3
ILMN_1766446	C6orf48	0	0	0	3
ILMN_2391765	C6orf48	0	0	0	3
ILMN_1722945	C6orf52	0	0	0	3
ILMN_1728057	C6orf57	0.0441558	0.0415584	0	3
ILMN_1680867	C6orf61	0.0012987	0.0025974	0.0012987	3
ILMN_1653797	C6orf62	0	0	0	3
ILMN_2168866	C6orf62	0.0025974	0.00519481	0	3
ILMN_1716728	C6orf64	0	0	0	3
ILMN_1659524	C6orf66	0	0	0	3
ILMN_2205350	C6orf66	0	0	0	3
ILMN_1657064	C6orf70	0	0	0	3
ILMN_2220403	C6orf72	0	0	0	3
ILMN_1705116	C6orf85	0	0	0	3
ILMN_1665117	C6orf89	0	0	0	3
ILMN_1772588	C6orf97	0.0311688	0.0012987	0.038961	3
ILMN_1763011	C7orf10	0.0025974	0	0	3
ILMN_1745119	C7orf11	0	0	0	3
ILMN_2183885	C7orf11	0.0012987	0	0	3
ILMN_1737663	C7orf13	0	0	0	3
ILMN_1701724	C7orf20	0	0	0	3
ILMN_1751143	C7orf23	0	0	0	3
ILMN_1751051	C7orf25	0	0	0	3
ILMN_1730048	C7orf26	0	0	0	3
ILMN_1804498	C7orf27	0	0	0	3
ILMN_1660270	C7orf28A	0	0	0	3
ILMN_1708604	C7orf28A	0	0	0	3
ILMN_2246083	C7orf28B	0	0	0	3
ILMN_1713322	C7orf28B	0	0	0	3
ILMN_1663493	C7orf28B	0.00519481	0.00519481	0	3
ILMN_1739798	C7orf30	0	0	0	3
ILMN_1793508	C7orf36	0	0	0	3
ILMN_3235912	C7orf38	0.0012987	0.0025974	0	3
ILMN_3248773	C7orf40	0	0	0	3
ILMN_1672605	C7orf41	0	0	0	3
ILMN_1729130	C7orf42	0	0	0	3
ILMN_1770030	C7orf43	0	0	0	3
ILMN_2081335	C7orf44	0	0	0	3
ILMN_1741475	C7orf47	0	0	0	3
ILMN_1740903	C7orf49	0	0	0	3
ILMN_1718336	C7orf50	0	0	0	3
ILMN_2198859	C7orf52	0	0.0025974	0	3
ILMN_1779751	C7orf55	0	0	0	3
ILMN_3238680	C7orf55	0	0	0	3
ILMN_1790211	C7orf57	0	0	0	3
ILMN_1779735	C7orf59	0	0	0	3
ILMN_1659990	C7orf68	0	0	0	3
ILMN_1717219	C7orf70	0	0	0	3
ILMN_1687213	C8orf13	0	0	0	3
ILMN_3243302	C8orf30B	0	0	0	3
ILMN_2098325	C8orf33	0	0	0	3
ILMN_1706275	C8orf33	0	0	0	3
ILMN_1812841	C8orf34	0.0337662	0.0116883	0.0363636	3
ILMN_2091084	C8orf37	0	0	0	3
ILMN_1727618	C8orf38	0	0	0	3
ILMN_1656369	C8orf4	0	0	0	3
ILMN_1677385	C8orf40	0	0	0	3
ILMN_1760400	C8orf41	0	0	0	3
ILMN_2113738	C8orf45	0	0	0	3
ILMN_1657149	C8orf46	0.0012987	0.0025974	0	3
ILMN_1784408	C8orf48	0	0	0	3
ILMN_1688772	C8orf51	0.0012987	0.0025974	0	3
ILMN_1777740	C8orf55	0	0	0	3
ILMN_1764320	C8orf58	0	0	0	3
ILMN_1653205	C8orf59	0	0	0	3
ILMN_1742074	C8orf76	0	0	0	3
ILMN_3243899	C8orf83	0	0	0	3
ILMN_1753190	C9orf102	0	0	0	3
ILMN_1791306	C9orf103	0	0	0	3
ILMN_1750969	C9orf10OS	0	0	0	3
ILMN_1803317	C9orf114	0	0	0	3
ILMN_1723709	C9orf116	0	0	0	3
ILMN_2329569	C9orf116	0	0	0	3
ILMN_1811555	C9orf119	0	0	0	3
ILMN_1769409	C9orf123	0	0	0	3
ILMN_1809323	C9orf125	0.0272727	0.00519481	0.00519481	3
ILMN_1708029	C9orf127	0	0	0	3
ILMN_1738678	C9orf130	0	0	0	3
ILMN_1702197	C9orf140	0.00779221	0.0025974	0.0025974	3
ILMN_1761138	C9orf142	0	0	0	3
ILMN_1700028	C9orf156	0	0	0	3
ILMN_1782618	C9orf16	0	0	0	3
ILMN_1814106	C9orf169	0	0	0	3
ILMN_1663665	C9orf171	0	0	0	3
ILMN_1717229	C9orf21	0	0	0	3
ILMN_2391345	C9orf23	0.0012987	0.00519481	0.00909091	3
ILMN_1683175	C9orf23	0	0	0	3
ILMN_1746633	C9orf25	0	0.0025974	0	3
ILMN_1714278	C9orf30	0	0	0	3
ILMN_1799320	C9orf37	0	0	0	3
ILMN_1711799	C9orf40	0	0	0	3
ILMN_1719998	C9orf45	0.0012987	0.0025974	0.0025974	3
ILMN_1709043	C9orf46	0	0	0	3
ILMN_1788384	C9orf5	0	0	0	3
ILMN_1701873	C9orf50	0.00519481	0.0012987	0	3
ILMN_2323508	C9orf58	0	0	0	3
ILMN_2191929	C9orf6	0	0	0	3
ILMN_1685104	C9orf6	0	0	0	3
ILMN_3244065	C9orf69	0	0	0	3
ILMN_1814856	C9orf7	0	0	0	3
ILMN_1741881	C9orf72	0.0012987	0	0	3
ILMN_1664283	C9orf75	0	0.0012987	0	3
ILMN_1697166	C9orf78	0	0	0	3
ILMN_1688621	C9orf80	0	0	0	3
ILMN_2079098	C9orf80	0	0	0	3
ILMN_1755222	C9orf82	0	0	0	3
ILMN_1678477	C9orf85	0.0454546	0.00519481	0.0025974	3
ILMN_1806758	C9orf85	0.00519481	0	0	3
ILMN_1760628	C9orf86	0	0	0	3
ILMN_1659189	C9orf89	0	0	0	3
ILMN_1813837	C9orf9	0	0.0012987	0	3
ILMN_1714148	C9orf90	0	0	0	3
ILMN_1803652	C9orf91	0	0.0025974	0	3
ILMN_1720998	CA12	0	0	0	3
ILMN_2382942	CA12	0	0	0	3
ILMN_1802414	CA13	0.0012987	0	0.00519481	3
ILMN_1742358	CA14	0	0	0	3
ILMN_1662795	CA2	0	0	0	3
ILMN_2199439	CA2	0	0	0	3
ILMN_1765858	CAB39	0	0	0	3
ILMN_1783598	CAB39L	0.0038961	0.00519481	0.00519481	3
ILMN_1814044	CABIN1	0.0025974	0.00519481	0.00519481	3
ILMN_1653001	CABLES1	0.0012987	0.0012987	0	3
ILMN_1762407	CABLES2	0	0	0	3
ILMN_2412139	CABYR	0.0168831	0.025974	0.00519481	3
ILMN_1738854	CACHD1	0	0	0	3
ILMN_1666775	CACNA1C	0.00779221	0.00519481	0.038961	3
ILMN_1664047	CACNA1E	0.0350649	0.00519481	0.0415584	3
ILMN_1671263	CACNA1H	0.00519481	0.00649351	0.00519481	3
ILMN_2406106	CACNB2	0	0	0	3
ILMN_1653878	CACNB2	0	0	0	3
ILMN_2195482	CACNB3	0	0	0	3
ILMN_1724306	CACNG1	0.00519481	0.0025974	0	3
ILMN_1779043	CACNG6	0.0038961	0.00519481	0.00909091	3
ILMN_1726574	CACYBP	0	0	0	3
ILMN_1810992	CAD	0	0	0	3
ILMN_1680132	CADM1	0	0	0	3
ILMN_1664679	CADM2	0	0	0	3
ILMN_1701827	CADM3	0	0.0168831	0	3
ILMN_1812096	CADM4	0	0	0	3
ILMN_1665547	CADPS	0	0	0	3
ILMN_1684461	CADPS2	0.0116883	0.00519481	0	3
ILMN_1748840	CALB2	0	0	0	3
ILMN_1755504	CALCOCO2	0.00909091	0.0116883	0.00519481	3
ILMN_1730487	CALD1	0	0	0	3
ILMN_2324002	CALD1	0	0	0	3
ILMN_1717990	CALD1	0.0493507	0.0233766	0.0220779	3
ILMN_1766200	CALHM2	0.0012987	0	0	3
ILMN_1778242	CALM1	0	0	0	3
ILMN_1687858	CALM2	0	0	0	3
ILMN_1666385	CALM3	0	0	0	3
ILMN_1778121	CALN1	0	0	0	3
ILMN_1736256	CALR	0	0	0	3
ILMN_1727194	CALU	0	0	0	3
ILMN_2140990	CAMK1	0	0	0	3
ILMN_1751561	CAMK1D	0	0	0	3
ILMN_1795561	CAMK1D	0	0	0	3
ILMN_1804339	CAMK1G	0.00779221	0.0025974	0	3
ILMN_1666445	CAMK2A	0	0	0	3
ILMN_1683415	CAMK2D	0	0	0	3
ILMN_2319544	CAMK2D	0	0	0.00519481	3
ILMN_1658818	CAMK2D	0.0298701	0.0168831	0.00909091	3
ILMN_1809695	CAMK2G	0	0	0	3
ILMN_2359601	CAMK2G	0.0025974	0.00649351	0	3
ILMN_1794863	CAMK2N1	0	0	0	3
ILMN_1667381	CAMKV	0	0	0	3
ILMN_1714599	CAMLG	0	0	0	3
ILMN_1811957	CAMSAP1	0	0	0	3
ILMN_1792660	CAMSAP1L1	0	0	0	3
ILMN_1661940	CAMTA1	0	0	0	3
ILMN_1744647	CAND1	0	0	0	3
ILMN_2073592	CAND2	0	0	0	3
ILMN_1664012	CANT1	0	0	0	3
ILMN_1762825	CANX	0	0	0	3
ILMN_2401057	CANX	0	0	0	3
ILMN_1797604	CAP1	0	0	0	3
ILMN_1691237	CAP2	0	0	0	3
ILMN_1705261	CAPN1	0	0	0	3
ILMN_1716057	CAPN2	0	0	0	3
ILMN_1737089	CAPN5	0	0	0	3
ILMN_1685022	CAPN7	0	0	0	3
ILMN_1655418	CAPNS1	0	0	0	3
ILMN_2393254	CAPNS1	0	0	0	3
ILMN_1770676	CAPRIN1	0	0	0	3
ILMN_1782897	CAPRIN1	0	0	0	3
ILMN_1754145	CAPRIN1	0	0	0	3
ILMN_1681118	CAPRIN2	0	0	0	3
ILMN_2345739	CAPRIN2	0	0	0	3
ILMN_2286400	CAPS	0.0012987	0.0025974	0.00909091	3
ILMN_1757660	CAPS	0	0	0	3
ILMN_3307742	CAPS2	0	0	0	3
ILMN_1803742	CAPZA1	0	0	0	3
ILMN_1768870	CAPZA2	0	0	0	3
ILMN_2053921	CAPZB	0	0	0	3
ILMN_1798980	CAPZB	0	0	0	3
ILMN_1743714	CARD10	0	0	0	3
ILMN_1721978	CARD11	0.00909091	0.0272727	0.025974	3
ILMN_1671728	CARD14	0	0	0	3
[truncated: 45,232 more rows]

## Sheet: Intersection
				heNSC	Clonetech	OBNSC
				15452	15490	2856
		heNSC	15452	15452	12562	2218
		Clonetech	15490	12562	15490	2207
		OBNSC	2856	2218	2207	2856
				# of probes
		Expressed high confidence heNSC		15452
		Expressed high confidence OBNSC		2856
		Expressed high confidence Dopamn neur		15490
		common between heNSC and OBNSC		2218
		common between heNSC and dop neur		12562
		common between OBNSC and dop neur		2207
		Expressed in OBNSC but not in ehNSC		638
		Expressed in ehNSC but not in OBNSC		13234

## Sheet: calculation
	ILMN_1343291	1			1	1			ILMN_1343291		1
	ILMN_1343295	1			1	1			ILMN_1343295		1
	ILMN_1651262	1			1	1			ILMN_1651228		1
	ILMN_1651347	1			1	1			ILMN_1651229		1
	ILMN_1651513	1			1	1			ILMN_1651254		1
	ILMN_1651642	1			1	1			ILMN_1651262		1
	ILMN_1651680	1			1	1			ILMN_1651278		1
	ILMN_1651788	1			1	1			ILMN_1651296		1
	ILMN_1651826	1			1	1			ILMN_1651315		1
	ILMN_1651850	1			1	1			ILMN_1651346		1
	ILMN_1652085	1			1	1			ILMN_1651347		1
	ILMN_1652123	1			1	1			ILMN_1651354		1
	ILMN_1652128	1			1	1			ILMN_1651378		1
	ILMN_1652160	1			1	1			ILMN_1651385		1
	ILMN_1652230	1			1	1			ILMN_1651405		1
	ILMN_1652242	1			1	1			ILMN_1651429		1
	ILMN_1652459	1			1	1			ILMN_1651433		1
	ILMN_1652464	1			1	1			ILMN_1651438		1
	ILMN_1652549	1			1	1			ILMN_1651498		1
	ILMN_1652638	1			1	1			ILMN_1651504		1
	ILMN_1652768	1			1	1			ILMN_1651513		1
	ILMN_1652806	1			1	1			ILMN_1651538		1
	ILMN_1652955	1			1	1			ILMN_1651557		1
	ILMN_1653200	1			1	1			ILMN_1651610		1
	ILMN_1653367	1			1	1			ILMN_1651628		1
	ILMN_1653432	1			1	1			ILMN_1651642		1
	ILMN_1653469	1			1	1			ILMN_1651680		1
	ILMN_1653514	1			1	1			ILMN_1651684		1
	ILMN_1653529	1			1	1			ILMN_1651692		1
	ILMN_1654060	1			1	1			ILMN_1651699		1
	ILMN_1654118	1			1	1			ILMN_1651719		1
	ILMN_1654151	1			1	1			ILMN_1651735		1
	ILMN_1654268	1			1	1			ILMN_1651745		1
	ILMN_1654552	1			1	1			ILMN_1651767		1
	ILMN_1654583	1			1	1			ILMN_1651776		1
	ILMN_1654637	1			1	1			ILMN_1651788		1
	ILMN_1654697	1			1	1			ILMN_1651799		1
	ILMN_1654773	1			1	1			ILMN_1651819		1
	ILMN_1654893	1			1	1			ILMN_1651826		1
	ILMN_1655137	1			1	1			ILMN_1651828		1
	ILMN_1655194	1			1	1			ILMN_1651832		1
	ILMN_1655195	1			1	1			ILMN_1651850		1
	ILMN_1655311	1			1	1			ILMN_1651872		1
	ILMN_1655316	1			1	1			ILMN_1651886		1
	ILMN_1655433	1			1	1			ILMN_1651899		1
	ILMN_1655469	1			1	1			ILMN_1651936		1
	ILMN_1655482	1			1	1			ILMN_1651950		1
	ILMN_1655557	1			1	1			ILMN_1651958		1
	ILMN_1655694	1			1	1			ILMN_1651964		1
	ILMN_1655884	1			1	1			ILMN_1651987		1
	ILMN_1656066	1			1	1			ILMN_1652003		1
	ILMN_1656082	1			1	1			ILMN_1652024		1
	ILMN_1656118	1			1	1			ILMN_1652065		1
	ILMN_1656415	1			1	1			ILMN_1652072		1
	ILMN_1656501	1			1	1			ILMN_1652073		1
	ILMN_1656625	1			1	1			ILMN_1652085		1
	ILMN_1656662	1			1	1			ILMN_1652123		1
	ILMN_1656807	1			1	1			ILMN_1652128		1
	ILMN_1656869	1			1	1			ILMN_1652160		1
	ILMN_1656913	1			1	1			ILMN_1652163		1
	ILMN_1656962	1			1	1			ILMN_1652207		1
	ILMN_1657395	1			1	1			ILMN_1652215		1
	ILMN_1657478	1			1	1			ILMN_1652223		1
	ILMN_1657722	1			1	1			ILMN_1652230		1
	ILMN_1657860	1			1	1			ILMN_1652237		1
	ILMN_1657884	1			1	1			ILMN_1652244		1
	ILMN_1657932	1			1	1			ILMN_1652246		1
	ILMN_1658182	1			1	1			ILMN_1652306		1
	ILMN_1658247	1			1	1			ILMN_1652309		1
	ILMN_1658411	1			1	1			ILMN_1652333		1
	ILMN_1658513	1			1	1			ILMN_1652357		1
	ILMN_1658531	1			1	1			ILMN_1652371		1
	ILMN_1658660	1			1	1			ILMN_1652379		1
	ILMN_1658802	1			1	1			ILMN_1652394		1
	ILMN_1658847	1			1	1			ILMN_1652407		1
	ILMN_1658904	1			1	1			ILMN_1652409		1
	ILMN_1658911	1			1	1			ILMN_1652434		1
	ILMN_1658928	1			1	1			ILMN_1652456		1
	ILMN_1659029	1			1	1			ILMN_1652459		1
	ILMN_1659270	1			1	1			ILMN_1652464		1
	ILMN_1659343	1			1	1			ILMN_1652466		1
	ILMN_1659371	1			1	1			ILMN_1652486		1
	ILMN_1659405	1			1	1			ILMN_1652490		1
	ILMN_1659550	1			1	1			ILMN_1652505		1
	ILMN_1659564	1			1	1			ILMN_1652512		1
	ILMN_1659753	1			1	1			ILMN_1652521		1
	ILMN_1659771	1			1	1			ILMN_1652525		1
	ILMN_1659888	1			1	1			ILMN_1652533		1
	ILMN_1660027	1			1	1			ILMN_1652540		1
	ILMN_1660079	1			1	1			ILMN_1652549		1
	ILMN_1660232	1			1	1			ILMN_1652631		1
	ILMN_1660372	1			1	1			ILMN_1652638		1
	ILMN_1660376	1			1	1			ILMN_1652677		1
	ILMN_1660426	1			1	1			ILMN_1652722		1
	ILMN_1660439	1			1	1			ILMN_1652735		1
	ILMN_1660498	1			1	1			ILMN_1652749		1
	ILMN_1660832	1			1	1			ILMN_1652753		1
	ILMN_1660844	1			1	1			ILMN_1652754		1
	ILMN_1660847	1			1	1			ILMN_1652762		1
	ILMN_1660923	1			1	1			ILMN_1652768		1
	ILMN_1661173	1			1	1			ILMN_1652777		1
	ILMN_1661325	1			1	1			ILMN_1652806		1
	ILMN_1661335	1			1	1			ILMN_1652846		1
	ILMN_1661346	1			1	1			ILMN_1652907		1
	ILMN_1661366	1			1	1			ILMN_1652955		1
	ILMN_1661490	1			1	1			ILMN_1652989		1
	ILMN_1661622	1			1	1			ILMN_1653001		1
	ILMN_1661653	1			1	1			ILMN_1653028		1
	ILMN_1661683	1			1	1			ILMN_1653039		1
	ILMN_1661733	1			1	1			ILMN_1653115		1
	ILMN_1661743	1			1	1			ILMN_1653129		1
	ILMN_1661886	1			1	1			ILMN_1653133		1
	ILMN_1661917	1			1	1			ILMN_1653134		1
	ILMN_1661940	1			1	1			ILMN_1653165		1
	ILMN_1661994	1			1	1			ILMN_1653180		1
	ILMN_1662010	1			1	1			ILMN_1653200		1
	ILMN_1662021	1			1	1			ILMN_1653203		1
	ILMN_1662438	1			1	1			ILMN_1653205		1
	ILMN_1662617	1			1	1			ILMN_1653220		1
	ILMN_1662719	1			1	1			ILMN_1653263		1
	ILMN_1662751	1			1	1			ILMN_1653266		1
	ILMN_1662905	1			1	1			ILMN_1653292		1
	ILMN_1662910	1			1	1			ILMN_1653319		1
	ILMN_1662973	1			1	1			ILMN_1653367		1
	ILMN_1663035	1			1	1			ILMN_1653404		1
	ILMN_1663090	1			1	1			ILMN_1653412		1
	ILMN_1663092	1			1	1			ILMN_1653429		1
	ILMN_1663195	1			1	1			ILMN_1653432		1
	ILMN_1663313	1			1	1			ILMN_1653438		1
	ILMN_1663347	1			1	1			ILMN_1653466		1
	ILMN_1663390	1			1	1			ILMN_1653469		1
	ILMN_1663416	1			1	1			ILMN_1653504		1
	ILMN_1663486	1			1	1			ILMN_1653514		1
	ILMN_1663489	1			1	1			ILMN_1653529		1
	ILMN_1663512	1			1	1			ILMN_1653553		1
	ILMN_1663893	1			1	1			ILMN_1653599		1
	ILMN_1664028	1			1	1			ILMN_1653612		1
	ILMN_1664118	1			1	1			ILMN_1653613		1
	ILMN_1664153	1			1	1			ILMN_1653618		1
	ILMN_1664440	1			1	1			ILMN_1653708		1
	ILMN_1664610	1			1	1			ILMN_1653709		1
	ILMN_1664614	1			1	1			ILMN_1653712		1
	ILMN_1664756	1			1	1			ILMN_1653718		1
	ILMN_1664826	1			1	1			ILMN_1653794		1
	ILMN_1665148	1			1	1			ILMN_1653797		1
	ILMN_1665192	1			1	1			ILMN_1653801		1
	ILMN_1665280	1			1	1			ILMN_1653828		1
	ILMN_1665483	1			1	1			ILMN_1653836		1
	ILMN_1665583	1			1	1			ILMN_1653856		1
	ILMN_1665630	1			1	1			ILMN_1653861		1
	ILMN_1665736	1			1	1			ILMN_1654016		1
	ILMN_1665781	1			1	1			ILMN_1654032		1
	ILMN_1665823	1			1	1			ILMN_1654060		1
	ILMN_1665909	1			1	1			ILMN_1654068		1
	ILMN_1665970	1			1	1			ILMN_1654072		1
	ILMN_1666122	1			1	1			ILMN_1654099		1
	ILMN_1666156	1			1	1			ILMN_1654112		1
	ILMN_1666385	1			1	1			ILMN_1654118		1
	ILMN_1666449	1			1	1			ILMN_1654151		1
	ILMN_1666512	1			1	1			ILMN_1654262		1
	ILMN_1666564	1			1	1			ILMN_1654268		1
	ILMN_1666635	1			1	1			ILMN_1654287		1
	ILMN_1666713	1			1	1			ILMN_1654289		1
	ILMN_1666761	1			1	1			ILMN_1654320		1
	ILMN_1666819	1			1	1			ILMN_1654322		1
	ILMN_1666853	1			1	1			ILMN_1654385		1
	ILMN_1667112	1			1	1			ILMN_1654392		1
	ILMN_1667257	1			1	1			ILMN_1654398		1
	ILMN_1667306	1			1	1			ILMN_1654441		1
	ILMN_1667381	1			1	1			ILMN_1654445		1
	ILMN_1667592	1			1	1			ILMN_1654457		1
	ILMN_1667813	1			1	1			ILMN_1654488		1
	ILMN_1667840	1			1	1			ILMN_1654497		1
	ILMN_1667970	1			1	1			ILMN_1654516		1
	ILMN_1667994	1			1	1			ILMN_1654541		1
	ILMN_1668065	1			1	1			ILMN_1654542		1
	ILMN_1668194	1			1	1			ILMN_1654543		1
	ILMN_1668228	1			1	1			ILMN_1654545		1
	ILMN_1668469	1			1	1			ILMN_1654552		1
	ILMN_1668559	1			1	1			ILMN_1654566		1
	ILMN_1668582	1			1	1			ILMN_1654583		1
	ILMN_1668619	1			1	1			ILMN_1654586		1
	ILMN_1668960	1			1	1			ILMN_1654606		1
	ILMN_1668996	1			1	1			ILMN_1654609		1
	ILMN_1669233	1			1	1			ILMN_1654629		1
	ILMN_1669252	1			1	1			ILMN_1654639		1
	ILMN_1669259	1			1	1			ILMN_1654653		1
	ILMN_1669424	1			1	1			ILMN_1654689		1
	ILMN_1669502	1			1	1			ILMN_1654690		1
	ILMN_1669553	1			1	1			ILMN_1654691		1
	ILMN_1669584	1			1	1			ILMN_1654697		1
	ILMN_1669718	1			1	1			ILMN_1654722		1
	ILMN_1669832	1			1	1			ILMN_1654735		1
	ILMN_1670096	1			1	1			ILMN_1654737		1
	ILMN_1670172	1			1	1			ILMN_1654773		1
	ILMN_1670272	1			1	1			ILMN_1654851		1
	ILMN_1670308	1			1	1			ILMN_1654861		1
	ILMN_1670420	1			1	1			ILMN_1654893		1
	ILMN_1670456	1			1	1			ILMN_1654920		1
	ILMN_1670572	1			1	1			ILMN_1654939		1
	ILMN_1670723	1			1	1			ILMN_1654946		1
	ILMN_1670870	1			1	1			ILMN_1654966		1
	ILMN_1670895	1			1	1			ILMN_1655011		1
	ILMN_1671045	1			1	1			ILMN_1655046		1
	ILMN_1671114	1			1	1			ILMN_1655051		1
	ILMN_1671152	1			1	1			ILMN_1655068		1
	ILMN_1671217	1			1	1			ILMN_1655117		1
	ILMN_1671291	1			1	1			ILMN_1655126		1
	ILMN_1671314	1			1	1			ILMN_1655137		1
	ILMN_1671326	1			1	1			ILMN_1655154		1
	ILMN_1671372	1			1	1			ILMN_1655163		1
	ILMN_1671603	1			1	1			ILMN_1655165		1
	ILMN_1671728	1			1	1			ILMN_1655177		1
	ILMN_1671791	1			1	1			ILMN_1655194		1
	ILMN_1672004	1			1	1			ILMN_1655195		1
	ILMN_1672009	1			1	1			ILMN_1655206		1
	ILMN_1672446	1			1	1			ILMN_1655244		1
	ILMN_1672496	1			1	1			ILMN_1655245		1
	ILMN_1672503	1			1	1			ILMN_1655296		1
	ILMN_1672596	1			1	1			ILMN_1655307		1
	ILMN_1672650	1			1	1			ILMN_1655311		1
	ILMN_1672687	1			1	1			ILMN_1655312		1
	ILMN_1672755	1			1	1			ILMN_1655316		1
	ILMN_1672759	1			1	1			ILMN_1655329		1
	ILMN_1672830	1			1	1			ILMN_1655340		1
	ILMN_1672961	1			1	1			ILMN_1655377		1
	ILMN_1673282	1			1	1			ILMN_1655418		1
	ILMN_1673352	1			1	1			ILMN_1655422		1
	ILMN_1673518	1			1	1			ILMN_1655429		1
	ILMN_1673711	1			1	1			ILMN_1655433		1
	ILMN_1673738	1			1	1			ILMN_1655444		1
	ILMN_1673746	1			1	1			ILMN_1655469		1
	ILMN_1673795	1			1	1			ILMN_1655482		1
	ILMN_1674034	1			1	1			ILMN_1655485		1
	ILMN_1674038	1			1	1			ILMN_1655497		1
	ILMN_1674050	1			1	1			ILMN_1655498		1
	ILMN_1674364	1			1	1			ILMN_1655557		1
	ILMN_1674385	1			1	1			ILMN_1655561		1
	ILMN_1674620	1			1	1			ILMN_1655563		1
	ILMN_1674955	1			1	1			ILMN_1655595		1
	ILMN_1675156	1			1	1			ILMN_1655611		1
	ILMN_1675852	1			1	1			ILMN_1655622		1
	ILMN_1676010	1			1	1			ILMN_1655635		1
	ILMN_1676036	1			1	1			ILMN_1655654		1
	ILMN_1676159	1			1	1			ILMN_1655663		1
	ILMN_1676248	1			1	1			ILMN_1655684		1
	ILMN_1676548	1			1	1			ILMN_1655694		1
	ILMN_1676616	1			1	1			ILMN_1655710		1
	ILMN_1676719	1			1	1			ILMN_1655734		1
	ILMN_1676765	1			1	1			ILMN_1655740		1
	ILMN_1676792	1			1	1			ILMN_1655748		1
	ILMN_1677402	1			1	1			ILMN_1655765		1
	ILMN_1677719	1			1	1			ILMN_1655796		1
	ILMN_1677768	1			1	1			ILMN_1655827		1
	ILMN_1677843	1			1	1			ILMN_1655867		1
	ILMN_1677906	1			1	1			ILMN_1655884		1
	ILMN_1677920	1			1	1			ILMN_1655913		1
	ILMN_1678087	1			1	1			ILMN_1655921		1
	ILMN_1678203	1			1	1			ILMN_1655922		1
	ILMN_1678235	1			1	1			ILMN_1655924		1
	ILMN_1678290	1			1	1			ILMN_1655930		1
	ILMN_1678522	1			1	1			ILMN_1655952		1
	ILMN_1678546	1			1	1			ILMN_1655990		1
	ILMN_1678618	1			1	1			ILMN_1656016		1
	ILMN_1678629	1			1	1			ILMN_1656042		1
	ILMN_1678707	1			1	1			ILMN_1656066		1
	ILMN_1678775	1			1	1			ILMN_1656082		1
	ILMN_1679025	1			1	1			ILMN_1656111		1
	ILMN_1679262	1			1	1			ILMN_1656118		1
	ILMN_1679280	1			1	1			ILMN_1656129		1
	ILMN_1679382	1			1	1			ILMN_1656134		1
	ILMN_1679428	1			1	1			ILMN_1656136		1
	ILMN_1679495	1			1	1			ILMN_1656145		1
	ILMN_1679587	1			1	1			ILMN_1656165		1
	ILMN_1679700	1			1	1			ILMN_1656184		1
	ILMN_1679727	1			1	1			ILMN_1656185		1
	ILMN_1679800	1			1	1			ILMN_1656186		1
	ILMN_1679949	1			1	1			ILMN_1656196		1
	ILMN_1680072	1			1	1			ILMN_1656233		1
	ILMN_1680132	1			1	1			ILMN_1656254		1
	ILMN_1680208	1			1	1			ILMN_1656274		1
	ILMN_1680251	1			1	1			ILMN_1656287		1
	ILMN_1680341	1			1	1			ILMN_1656292		1
	ILMN_1680403	1			1	1			ILMN_1656293		1
	ILMN_1680436	1			1	1			ILMN_1656297		1
	ILMN_1680437	1			1	1			ILMN_1656300		1
	ILMN_1680618	1			1	1			ILMN_1656316		1
	ILMN_1680626	1			1	1			ILMN_1656335		1
	ILMN_1680687	1			1	1			ILMN_1656368		1
	ILMN_1680693	1			1	1			ILMN_1656372		1
	ILMN_1680738	1			1	1			ILMN_1656378		1
	ILMN_1680874	1			1	1			ILMN_1656393		1
	ILMN_1680899	1			1	1			ILMN_1656399		1
	ILMN_1681136	1			1	1			ILMN_1656413		1
	ILMN_1681325	1			1	1			ILMN_1656415		1
	ILMN_1681670	1			1	1			ILMN_1656427		1
	ILMN_1682139	1			1	1			ILMN_1656482		1
	ILMN_1682368	1			1	1			ILMN_1656486		1
	ILMN_1682774	1			1	1			ILMN_1656501		1
	ILMN_1682783	1			1	1			ILMN_1656504		1
	ILMN_1682873	1			1	1			ILMN_1656537		1
	ILMN_1683133	1			1	1			ILMN_1656560		1
	ILMN_1683148	1			1	1			ILMN_1656574		1
	ILMN_1683211	1			1	1			ILMN_1656621		1
	ILMN_1683231	1			1	1			ILMN_1656625		1
	ILMN_1683271	1			1	1			ILMN_1656628		1
	ILMN_1683277	1			1	1			ILMN_1656656		1
	ILMN_1683498	1			1	1			ILMN_1656662		1
	ILMN_1683597	1			1	1			ILMN_1656670		1
	ILMN_1683660	1			1	1			ILMN_1656676		1
	ILMN_1683664	1			1	1			ILMN_1656682		1
	ILMN_1683678	1			1	1			ILMN_1656718		1
	ILMN_1683811	1			1	1			ILMN_1656791		1
	ILMN_1683950	1			1	1			ILMN_1656807		1
	ILMN_1683969	1			1	1			ILMN_1656822		1
	ILMN_1684114	1			1	1			ILMN_1656826		1
	ILMN_1684321	1			1	1			ILMN_1656837		1
	ILMN_1684368	1			1	1			ILMN_1656868		1
	ILMN_1684413	1			1	1			ILMN_1656869		1
	ILMN_1684440	1			1	1			ILMN_1656898		1
	ILMN_1684554	1			1	1			ILMN_1656902		1
	ILMN_1684929	1			1	1			ILMN_1656904		1
	ILMN_1685104	1			1	1			ILMN_1656913		1
	ILMN_1685413	1			1	1			ILMN_1656951		1
	ILMN_1685538	1			1	1			ILMN_1656962		1
	ILMN_1685551	1			1	1			ILMN_1656977		1
	ILMN_1685602	1			1	1			ILMN_1657064		1
	ILMN_1685722	1			1	1			ILMN_1657077		1
	ILMN_1685774	1			1	1			ILMN_1657095		1
	ILMN_1685854	1			1	1			ILMN_1657111		1
	ILMN_1685870	1			1	1			ILMN_1657129		1
	ILMN_1685886	1			1	1			ILMN_1657139		1
	ILMN_1685948	1			1	1			ILMN_1657149		1
	ILMN_1685985	1			1	1			ILMN_1657153		1
	ILMN_1686235	1			1	1			ILMN_1657204		1
	ILMN_1686367	1			1	1			ILMN_1657283		1
	ILMN_1686516	1			1	1			ILMN_1657332		1
	ILMN_1686555	1			1	1			ILMN_1657347		1
	ILMN_1686811	1			1	1			ILMN_1657373		1
	ILMN_1686871	1			1	1			ILMN_1657395		1
	ILMN_1686920	1			1	1			ILMN_1657405		1
	ILMN_1686954	1			1	1			ILMN_1657423		1
	ILMN_1686968	1			1	1			ILMN_1657436		1
	ILMN_1687080	1			1	1			ILMN_1657446		1
	ILMN_1687351	1			1	1			ILMN_1657470		1
	ILMN_1687583	1			1	1			ILMN_1657475		1
	ILMN_1687589	1			1	1			ILMN_1657478		1
	ILMN_1687625	1			1	1			ILMN_1657483		1
	ILMN_1687626	1			1	1			ILMN_1657495		1
	ILMN_1687711	1			1	1			ILMN_1657509		1
	ILMN_1687738	1			1	1			ILMN_1657547		1
	ILMN_1687805	1			1	1			ILMN_1657550		1
	ILMN_1687858	1			1	1			ILMN_1657571		1
	ILMN_1687887	1			1	1			ILMN_1657612		1
	ILMN_1687958	1			1	1			ILMN_1657624		1
	ILMN_1688127	1			1	1			ILMN_1657632		1
	ILMN_1688295	1			1	1			ILMN_1657679		1
	ILMN_1688413	1			1	1			ILMN_1657682		1
	ILMN_1688698	1			1	1			ILMN_1657683		1
	ILMN_1688749	1			1	1			ILMN_1657697		1
	ILMN_1689097	1			1	1			ILMN_1657708		1
	ILMN_1689156	1			1	1			ILMN_1657722		1
	ILMN_1689456	1			1	1			ILMN_1657744		1
	ILMN_1689665	1			1	1			ILMN_1657746		1
	ILMN_1689704	1			1	1			ILMN_1657760		1
	ILMN_1689712	1			1	1			ILMN_1657771		1
	ILMN_1689725	1			1	1			ILMN_1657790		1
	ILMN_1689817	1			1	1			ILMN_1657796		1
	ILMN_1690049	1			1	1			ILMN_1657797		1
	ILMN_1690122	1			1	1			ILMN_1657810		1
	ILMN_1690125	1			1	1			ILMN_1657837		1
	ILMN_1690295	1			1	1			ILMN_1657857		1
	ILMN_1690342	1			1	1			ILMN_1657860		1
	ILMN_1690487	1			1	1			ILMN_1657862		1
	ILMN_1690494	1			1	1			ILMN_1657864		1
	ILMN_1690586	1			1	1			ILMN_1657873		1
	ILMN_1690802	1			1	1			ILMN_1657884		1
	ILMN_1691106	1			1	1			ILMN_1657893		1
	ILMN_1691156	1			1	1			ILMN_1657932		1
	ILMN_1691290	1			1	1			ILMN_1657949		1
	ILMN_1691393	1			1	1			ILMN_1657950		1
	ILMN_1691402	1			1	1			ILMN_1657968		1
	ILMN_1691413	1			1	1			ILMN_1657977		1
	ILMN_1691449	1			1	1			ILMN_1657983		1
	ILMN_1691458	1			1	1			ILMN_1657993		1
	ILMN_1691526	1			1	1			ILMN_1658015		1
	ILMN_1691570	1			1	1			ILMN_1658040		1
	ILMN_1691575	1			1	1			ILMN_1658053		1
	ILMN_1691611	1			1	1			ILMN_1658071		1
	ILMN_1691716	1			1	1			ILMN_1658094		1
	ILMN_1691930	1			1	1			ILMN_1658104		1
	ILMN_1691942	1			1	1			ILMN_1658144		1
	ILMN_1692049	1			1	1			ILMN_1658152		1
	ILMN_1692177	1			1	1			ILMN_1658160		1
	ILMN_1692260	1			1	1			ILMN_1658176		1
	ILMN_1692272	1			1	1			ILMN_1658182		1
	ILMN_1692486	1			1	1			ILMN_1658206		1
	ILMN_1692545	1			1	1			ILMN_1658247		1
	ILMN_1692575	1			1	1			ILMN_1658259		1
	ILMN_1692714	1			1	1			ILMN_1658266		1
	ILMN_1692754	1			1	1			ILMN_1658283		1
	ILMN_1692844	1			1	1			ILMN_1658289		1
	ILMN_1692865	1			1	1			ILMN_1658290		1
	ILMN_1692916	1			1	1			ILMN_1658302		1
	ILMN_1693014	1			1	1			ILMN_1658351		1
	ILMN_1693108	1			1	1			ILMN_1658373		1
	ILMN_1693145	1			1	1			ILMN_1658399		1
	ILMN_1693293	1			1	1			ILMN_1658411		1
	ILMN_1693310	1			1	1			ILMN_1658416		1
	ILMN_1693352	1			1	1			ILMN_1658422		1
	ILMN_1693401	1			1	1			ILMN_1658425		1
	ILMN_1693430	1			1	1			ILMN_1658437		1
	ILMN_1693465	1			1	1			ILMN_1658439		1
	ILMN_1693604	1			1	1			ILMN_1658460		1
	ILMN_1693668	1			1	1			ILMN_1658464		1
	ILMN_1694147	1			1	1			ILMN_1658469		1
	ILMN_1694219	1			1	1			ILMN_1658472		1
	ILMN_1694305	1			1	1			ILMN_1658486		1
	ILMN_1694325	1			1	1			ILMN_1658504		1
	ILMN_1694385	1			1	1			ILMN_1658513		1
	ILMN_1694398	1			1	1			ILMN_1658526		1
	ILMN_1694502	1			1	1			ILMN_1658531		1
	ILMN_1694587	1			1	1			ILMN_1658619		1
	ILMN_1694742	1			1	1			ILMN_1658624		1
	ILMN_1694799	1			1	1			ILMN_1658677		1
	ILMN_1695034	1			1	1			ILMN_1658678		1
	ILMN_1695061	1			1	1			ILMN_1658684		1
	ILMN_1695261	1			1	1			ILMN_1658717		1
	ILMN_1695386	1			1	1			ILMN_1658746		1
	ILMN_1695420	1			1	1			ILMN_1658758		1
	ILMN_1695422	1			1	1			ILMN_1658759		1
	ILMN_1695461	1			1	1			ILMN_1658800		1
	ILMN_1695468	1			1	1			ILMN_1658802		1
	ILMN_1695585	1			1	1			ILMN_1658807		1
	ILMN_1695588	1			1	1			ILMN_1658809		1
	ILMN_1695590	1			1	1			ILMN_1658821		1
	ILMN_1695598	1			1	1			ILMN_1658830		1
	ILMN_1695606	1			1	1			ILMN_1658835		1
	ILMN_1695872	1			1	1			ILMN_1658847		1
	ILMN_1695945	1			1	1			ILMN_1658883		1
	ILMN_1696038	1			1	1			ILMN_1658885		1
	ILMN_1696187	1			1	1			ILMN_1658902		1
	ILMN_1696339	1			1	1			ILMN_1658911		1
	ILMN_1696407	1			1	1			ILMN_1658926		1
	ILMN_1696463	1			1	1			ILMN_1658928		1
	ILMN_1696485	1			1	1			ILMN_1658940		1
	ILMN_1696601	1			1	1			ILMN_1658950		1
	ILMN_1696699	1			1	1			ILMN_1658989		1
	ILMN_1696702	1			1	1			ILMN_1658992		1
	ILMN_1696749	1			1	1			ILMN_1658995		1
	ILMN_1696839	1			1	1			ILMN_1659017		1
	ILMN_1696883	1			1	1			ILMN_1659024		1
	ILMN_1696911	1			1	1			ILMN_1659027		1
	ILMN_1696956	1			1	1			ILMN_1659029		1
	ILMN_1697024	1			1	1			ILMN_1659047		1
	ILMN_1697363	1			1	1			ILMN_1659054		1
	ILMN_1697472	1			1	1			ILMN_1659058		1
	ILMN_1697550	1			1	1			ILMN_1659075		1
	ILMN_1697626	1			1	1			ILMN_1659082		1
	ILMN_1697654	1			1	1			ILMN_1659086		1
	ILMN_1697735	1			1	1			ILMN_1659095		1
	ILMN_1698233	1			1	1			ILMN_1659099		1
	ILMN_1698324	1			1	1			ILMN_1659106		1
	ILMN_1698330	1			1	1			ILMN_1659156		1
	ILMN_1698472	1			1	1			ILMN_1659189		1
	ILMN_1698677	1			1	1			ILMN_1659206		1
	ILMN_1698745	1			1	1			ILMN_1659240		1
	ILMN_1698849	1			1	1			ILMN_1659270		1
	ILMN_1698940	1			1	1			ILMN_1659273		1
	ILMN_1699015	1			1	1			ILMN_1659285		1
	ILMN_1699082	1			1	1			ILMN_1659316		1
	ILMN_1699112	1			1	1			ILMN_1659339		1
	ILMN_1699226	1			1	1			ILMN_1659343		1
	ILMN_1699253	1			1	1			ILMN_1659364		1
	ILMN_1699334	1			1	1			ILMN_1659371		1
	ILMN_1699545	1			1	1			ILMN_1659405		1
	ILMN_1699603	1			1	1			ILMN_1659411		1
	ILMN_1699711	1			1	1			ILMN_1659415		1
	ILMN_1699737	1			1	1			ILMN_1659437		1
	ILMN_1700025	1			1	1			ILMN_1659462		1
	ILMN_1700584	1			1	1			ILMN_1659463		1
	ILMN_1700674	1			1	1			ILMN_1659523		1
	ILMN_1700695	1			1	1			ILMN_1659524		1
	ILMN_1700733	1			1	1			ILMN_1659537		1
	ILMN_1700955	1			1	1			ILMN_1659550		1
	ILMN_1701025	1			1	1			ILMN_1659553		1
	ILMN_1701293	1			1	1			ILMN_1659564		1
	ILMN_1701314	1			1	1			ILMN_1659627		1
	ILMN_1701331	1			1	1			ILMN_1659659		1
	ILMN_1701596	1			1	1			ILMN_1659688		1
	ILMN_1701621	1			1	1			ILMN_1659703		1
	ILMN_1701641	1			1	1			ILMN_1659725		1
	ILMN_1701696	1			1	1			ILMN_1659727		1
	ILMN_1701855	1			1	1			ILMN_1659753		1
	ILMN_1702009	1			1	1			ILMN_1659761		1
	ILMN_1702487	1			1	1			ILMN_1659762		1
	ILMN_1702783	1			1	1			ILMN_1659766		1
	ILMN_1703123	1			1	1			ILMN_1659771		1
	ILMN_1703226	1			1	1			ILMN_1659777		1
	ILMN_1703335	1			1	1			ILMN_1659781		1
	ILMN_1703337	1			1	1			ILMN_1659782		1
	ILMN_1703427	1			1	1			ILMN_1659786		1
	ILMN_1703487	1			1	1			ILMN_1659801		1
	ILMN_1703565	1			1	1			ILMN_1659845		1
	ILMN_1703683	1			1	1			ILMN_1659857		1
	ILMN_1703720	1			1	1			ILMN_1659874		1
	ILMN_1703866	1			1	1			ILMN_1659888		1
	ILMN_1703949	1			1	1			ILMN_1659894		1
	ILMN_1704056	1			1	1			ILMN_1659895		1
	ILMN_1704315	1			1	1			ILMN_1659913		1
	ILMN_1704385	1			1	1			ILMN_1659923		1
	ILMN_1704452	1			1	1			ILMN_1659936		1
	ILMN_1704477	1			1	1			ILMN_1659937		1
	ILMN_1704619	1			1	1			ILMN_1659950		1
	ILMN_1704665	1			1	1			ILMN_1659952		1
	ILMN_1704961	1			1	1			ILMN_1659953		1
	ILMN_1705093	1			1	1			ILMN_1659975		1
	ILMN_1705310	1			1	1			ILMN_1659976		1
	ILMN_1705346	1			1	1			ILMN_1659990		1
	ILMN_1705364	1			1	1			ILMN_1660000		1
	ILMN_1705617	1			1	1			ILMN_1660021		1
	ILMN_1705685	1			1	1			ILMN_1660063		1
	ILMN_1705743	1			1	1			ILMN_1660079		1
	ILMN_1705907	1			1	1			ILMN_1660111		1
	ILMN_1706005	1			1	1			ILMN_1660186		1
	ILMN_1706075	1			1	1			ILMN_1660193		1
	ILMN_1706434	1			1	1			ILMN_1660199		1
	ILMN_1706546	1			1	1			ILMN_1660204		1
	ILMN_1707240	1			1	1			ILMN_1660223		1
	ILMN_1707339	1			1	1			ILMN_1660232		1
	ILMN_1707356	1			1	1			ILMN_1660270		1
	ILMN_1707484	1			1	1			ILMN_1660292		1
	ILMN_1707627	1			1	1			ILMN_1660305		1
	ILMN_1707763	1			1	1			ILMN_1660341		1
	ILMN_1707804	1			1	1			ILMN_1660345		1
	ILMN_1707810	1			1	1			ILMN_1660359		1
	ILMN_1707858	1			1	1			ILMN_1660368		1
	ILMN_1708249	1			1	1			ILMN_1660372		1
	ILMN_1708482	1			1	1			ILMN_1660376		1
	ILMN_1708619	1			1	1			ILMN_1660412		1
	ILMN_1708627	1			1	1			ILMN_1660426		1
	ILMN_1708709	1			1	1			ILMN_1660436		1
	ILMN_1708728	1			1	1			ILMN_1660439		1
	ILMN_1708743	1			1	1			ILMN_1660477		1
	ILMN_1708805	1			1	1			ILMN_1660498		1
	ILMN_1709334	1			1	1			ILMN_1660501		1
	ILMN_1709815	1			1	1			ILMN_1660519		1
	ILMN_1709880	1			1	1			ILMN_1660533		1
	ILMN_1709948	1			1	1			ILMN_1660544		1
	ILMN_1710406	1			1	1			ILMN_1660549		1
	ILMN_1710885	1			1	1			ILMN_1660551		1
	ILMN_1711048	1			1	1			ILMN_1660577		1
	ILMN_1711492	1			1	1			ILMN_1660582		1
	ILMN_1711516	1			1	1			ILMN_1660585		1
	ILMN_1711608	1			1	1			ILMN_1660602		1
	ILMN_1711702	1			1	1			ILMN_1660629		1
	ILMN_1712027	1			1	1			ILMN_1660635		1
	ILMN_1712088	1			1	1			ILMN_1660661		1
	ILMN_1712095	1			1	1			ILMN_1660691		1
	ILMN_1712204	1			1	1			ILMN_1660698		1
	ILMN_1712357	1			1	1			ILMN_1660718		1
	ILMN_1712431	1			1	1			ILMN_1660732		1
	ILMN_1712432	1			1	1			ILMN_1660749		1
	ILMN_1712577	1			1	1			ILMN_1660775		1
	ILMN_1712659	1			1	1			ILMN_1660787		1
	ILMN_1712678	1			1	1			ILMN_1660793		1
	ILMN_1712754	1			1	1			ILMN_1660806		1
	ILMN_1712786	1			1	1			ILMN_1660810		1
	ILMN_1712836	1			1	1			ILMN_1660832		1
	ILMN_1712914	1			1	1			ILMN_1660837		1
	ILMN_1712950	1			1	1			ILMN_1660840		1
	ILMN_1712975	1			1	1			ILMN_1660844		1
	ILMN_1713086	1			1	1			ILMN_1660847		1
	ILMN_1713369	1			1	1			ILMN_1660858		1
	ILMN_1713402	1			1	1			ILMN_1660869		1
	ILMN_1713482	1			1	1			ILMN_1660871		1
	ILMN_1713636	1			1	1			ILMN_1660880		1
	ILMN_1713682	1			1	1			ILMN_1660900		1
	ILMN_1714121	1			1	1			ILMN_1660923		1
	ILMN_1714159	1			1	1			ILMN_1660986		1
	ILMN_1714327	1			1	1			ILMN_1661000		1
	ILMN_1714401	1			1	1			ILMN_1661002		1
	ILMN_1714433	1			1	1			ILMN_1661138		1
	ILMN_1714445	1			1	1			ILMN_1661170		1
	ILMN_1715069	1			1	1			ILMN_1661173		1
	ILMN_1715175	1			1	1			ILMN_1661174		1
	ILMN_1715273	1			1	1			ILMN_1661194		1
	ILMN_1715324	1			1	1			ILMN_1661264		1
	ILMN_1715392	1			1	1			ILMN_1661266		1
	ILMN_1715814	1			1	1			ILMN_1661306		1
	ILMN_1715926	1			1	1			ILMN_1661325		1
	ILMN_1716014	1			1	1			ILMN_1661335		1
	ILMN_1716400	1			1	1			ILMN_1661337		1
	ILMN_1716524	1			1	1			ILMN_1661346		1
	ILMN_1716563	1			1	1			ILMN_1661366		1
	ILMN_1716591	1			1	1			ILMN_1661409		1
	ILMN_1716601	1			1	1			ILMN_1661424		1
	ILMN_1717420	1			1	1			ILMN_1661432		1
	ILMN_1717524	1			1	1			ILMN_1661439		1
	ILMN_1717636	1			1	1			ILMN_1661484		1
	ILMN_1717852	1			1	1			ILMN_1661485		1
	ILMN_1717934	1			1	1			ILMN_1661490		1
	ILMN_1718023	1			1	1			ILMN_1661491		1
	ILMN_1718128	1			1	1			ILMN_1661500		1
	ILMN_1718177	1			1	1			ILMN_1661519		1
	ILMN_1718182	1			1	1			ILMN_1661537		1
	ILMN_1718303	1			1	1			ILMN_1661554		1
	ILMN_1718629	1			1	1			ILMN_1661593		1
	ILMN_1718807	1			1	1			ILMN_1661594		1
	ILMN_1718831	1			1	1			ILMN_1661595		1
	ILMN_1718907	1			1	1			ILMN_1661596		1
	ILMN_1718924	1			1	1			ILMN_1661599		1
	ILMN_1718971	1			1	1			ILMN_1661622		1
	ILMN_1718997	1			1	1			ILMN_1661627		1
	ILMN_1719032	1			1	1			ILMN_1661636		1
	ILMN_1719163	1			1	1			ILMN_1661650		1
	ILMN_1719205	1			1	1			ILMN_1661653		1
	ILMN_1719254	1			1	1			ILMN_1661664		1
	ILMN_1719256	1			1	1			ILMN_1661717		1
	ILMN_1719273	1			1	1			ILMN_1661733		1
	ILMN_1719518	1			1	1			ILMN_1661743		1
	ILMN_1719606	1			1	1			ILMN_1661755		1
	ILMN_1720059	1			1	1			ILMN_1661776		1
	ILMN_1720249	1			1	1			ILMN_1661799		1
	ILMN_1720285	1			1	1			ILMN_1661833		1
	ILMN_1720542	1			1	1			ILMN_1661886		1
	ILMN_1720578	1			1	1			ILMN_1661917		1
	ILMN_1720745	1			1	1			ILMN_1661940		1
	ILMN_1720799	1			1	1			ILMN_1661945		1
	ILMN_1720819	1			1	1			ILMN_1662038		1
	ILMN_1720850	1			1	1			ILMN_1662049		1
	ILMN_1720858	1			1	1			ILMN_1662065		1
	ILMN_1721008	1			1	1			ILMN_1662129		1
	ILMN_1721093	1			1	1			ILMN_1662130		1
	ILMN_1721344	1			1	1			ILMN_1662147		1
	ILMN_1721623	1			1	1			ILMN_1662158		1
	ILMN_1721659	1			1	1			ILMN_1662161		1
	ILMN_1721729	1			1	1			ILMN_1662174		1
	ILMN_1721833	1			1	1			ILMN_1662192		1
	ILMN_1721868	1			1	1			ILMN_1662198		1
	ILMN_1721895	1			1	1			ILMN_1662232		1
	ILMN_1722409	1			1	1			ILMN_1662243		1
	ILMN_1722491	1			1	1			ILMN_1662263		1
	ILMN_1722538	1			1	1			ILMN_1662306		1
	ILMN_1722858	1			1	1			ILMN_1662316		1
	ILMN_1722900	1			1	1			ILMN_1662318		1
	ILMN_1723020	1			1	1			ILMN_1662328		1
	ILMN_1723092	1			1	1			ILMN_1662331		1
	ILMN_1723253	1			1	1			ILMN_1662334		1
	ILMN_1723662	1			1	1			ILMN_1662340		1
	ILMN_1723743	1			1	1			ILMN_1662358		1
	ILMN_1723793	1			1	1			ILMN_1662359		1
	ILMN_1723834	1			1	1			ILMN_1662364		1
	ILMN_1723843	1			1	1			ILMN_1662417		1
	ILMN_1723884	1			1	1			ILMN_1662426		1
	ILMN_1723978	1			1	1			ILMN_1662438		1
	ILMN_1724070	1			1	1			ILMN_1662470		1
	ILMN_1724166	1			1	1			ILMN_1662482		1
	ILMN_1724495	1			1	1			ILMN_1662483		1
	ILMN_1724718	1			1	1			ILMN_1662578		1
	ILMN_1724825	1			1	1			ILMN_1662617		1
	ILMN_1725105	1			1	1			ILMN_1662618		1
	ILMN_1725620	1			1	1			ILMN_1662640		1
	ILMN_1725707	1			1	1			ILMN_1662658		1
	ILMN_1725981	1			1	1			ILMN_1662686		1
	ILMN_1726025	1			1	1			ILMN_1662719		1
	ILMN_1726107	1			1	1			ILMN_1662741		1
	ILMN_1726222	1			1	1			ILMN_1662795		1
	ILMN_1726239	1			1	1			ILMN_1662839		1
	ILMN_1726308	1			1	1			ILMN_1662848		1
	ILMN_1726426	1			1	1			ILMN_1662852		1
	ILMN_1726647	1			1	1			ILMN_1662896		1
	ILMN_1726743	1			1	1			ILMN_1662905		1
	ILMN_1726839	1			1	1			ILMN_1662910		1
	ILMN_1726901	1			1	1			ILMN_1662917		1
	ILMN_1726928	1			1	1			ILMN_1662954		1
	ILMN_1727041	1			1	1			ILMN_1662963		1
	ILMN_1727073	1			1	1			ILMN_1662964		1
	ILMN_1727361	1			1	1			ILMN_1662970		1
	ILMN_1727438	1			1	1			ILMN_1663002		1
	ILMN_1727740	1			1	1			ILMN_1663032		1
	ILMN_1727813	1			1	1			ILMN_1663033		1
	ILMN_1727815	1			1	1			ILMN_1663035		1
	ILMN_1727840	1			1	1			ILMN_1663037		1
	ILMN_1728024	1			1	1			ILMN_1663042		1
	ILMN_1728047	1			1	1			ILMN_1663080		1
	ILMN_1728355	1			1	1			ILMN_1663090		1
	ILMN_1728512	1			1	1			ILMN_1663092		1
	ILMN_1728676	1			1	1			ILMN_1663113		1
	ILMN_1728803	1			1	1			ILMN_1663132		1
	ILMN_1728830	1			1	1			ILMN_1663158		1
	ILMN_1728965	1			1	1			ILMN_1663160		1
	ILMN_1729019	1			1	1			ILMN_1663195		1
	ILMN_1729112	1			1	1			ILMN_1663220		1
	ILMN_1729115	1			1	1			ILMN_1663313		1
	ILMN_1729142	1			1	1			ILMN_1663379		1
	ILMN_1729161	1			1	1			ILMN_1663383		1
	ILMN_1729175	1			1	1			ILMN_1663390		1
	ILMN_1729208	1			1	1			ILMN_1663399		1
	ILMN_1729216	1			1	1			ILMN_1663401		1
	ILMN_1729374	1			1	1			ILMN_1663407		1
	ILMN_1729495	1			1	1			ILMN_1663415		1
	ILMN_1729611	1			1	1			ILMN_1663416		1
	ILMN_1729645	1			1	1			ILMN_1663444		1
	ILMN_1729650	1			1	1			ILMN_1663484		1
	ILMN_1729832	1			1	1			ILMN_1663486		1
	ILMN_1730019	1			1	1			ILMN_1663489		1
	ILMN_1730118	1			1	1			ILMN_1663512		1
	ILMN_1730291	1			1	1			ILMN_1663519		1
	ILMN_1730307	1			1	1			ILMN_1663532		1
	ILMN_1730658	1			1	1			ILMN_1663541		1
	ILMN_1730685	1			1	1			ILMN_1663575		1
	ILMN_1730816	1			1	1			ILMN_1663577		1
	ILMN_1730940	1			1	1			ILMN_1663605		1
	ILMN_1731123	1			1	1			ILMN_1663616		1
	ILMN_1731353	1			1	1			ILMN_1663618		1
	ILMN_1731619	1			1	1			ILMN_1663631		1
	ILMN_1731688	1			1	1			ILMN_1663640		1
	ILMN_1731714	1			1	1			ILMN_1663664		1
	ILMN_1731783	1			1	1			ILMN_1663667		1
	ILMN_1732080	1			1	1			ILMN_1663685		1
	ILMN_1732154	1			1	1			ILMN_1663751		1
	ILMN_1732158	1			1	1			ILMN_1663787		1
	ILMN_1732426	1			1	1			ILMN_1663799		1
	ILMN_1732575	1			1	1			ILMN_1663866		1
	ILMN_1732612	1			1	1			ILMN_1663893		1
	ILMN_1733155	1			1	1			ILMN_1663954		1
	ILMN_1733559	1			1	1			ILMN_1664006		1
	ILMN_1733757	1			1	1			ILMN_1664010		1
	ILMN_1733807	1			1	1			ILMN_1664012		1
	ILMN_1733851	1			1	1			ILMN_1664014		1
	ILMN_1733927	1			1	1			ILMN_1664016		1
	ILMN_1734031	1			1	1			ILMN_1664028		1
	ILMN_1734096	1			1	1			ILMN_1664030		1
	ILMN_1734149	1			1	1			ILMN_1664047		1
	ILMN_1734312	1			1	1			ILMN_1664051		1
	ILMN_1734544	1			1	1			ILMN_1664068		1
	ILMN_1734826	1			1	1			ILMN_1664098		1
	ILMN_1735180	1			1	1			ILMN_1664118		1
	ILMN_1735353	1			1	1			ILMN_1664153		1
	ILMN_1735402	1			1	1			ILMN_1664167		1
	ILMN_1735438	1			1	1			ILMN_1664168		1
	ILMN_1735471	1			1	1			ILMN_1664175		1
	ILMN_1735474	1			1	1			ILMN_1664216		1
	ILMN_1735792	1			1	1			ILMN_1664231		1
	ILMN_1736154	1			1	1			ILMN_1664243		1
	ILMN_1736510	1			1	1			ILMN_1664283		1
	ILMN_1736562	1			1	1			ILMN_1664292		1
	ILMN_1736751	1			1	1			ILMN_1664303		1
	ILMN_1736847	1			1	1			ILMN_1664323		1
	ILMN_1737074	1			1	1			ILMN_1664369		1
	ILMN_1737164	1			1	1			ILMN_1664371		1
	ILMN_1737297	1			1	1			ILMN_1664398		1
	ILMN_1737298	1			1	1			ILMN_1664424		1
	ILMN_1737344	1			1	1			ILMN_1664434		1
	ILMN_1737396	1			1	1			ILMN_1664440		1
	ILMN_1737418	1			1	1			ILMN_1664449		1
	ILMN_1737535	1			1	1			ILMN_1664466		1
	ILMN_1737580	1			1	1			ILMN_1664537		1
	ILMN_1737586	1			1	1			ILMN_1664560		1
	ILMN_1737685	1			1	1			ILMN_1664577		1
	ILMN_1737813	1			1	1			ILMN_1664602		1
	ILMN_1737833	1			1	1			ILMN_1664608		1
	ILMN_1737991	1			1	1			ILMN_1664610		1
	ILMN_1738103	1			1	1			ILMN_1664614		1
	ILMN_1738150	1			1	1			ILMN_1664641		1
	ILMN_1738326	1			1	1			ILMN_1664644		1
	ILMN_1738356	1			1	1			ILMN_1664646		1
	ILMN_1738529	1			1	1			ILMN_1664679		1
	ILMN_1738657	1			1	1			ILMN_1664698		1
	ILMN_1738684	1			1	1			ILMN_1664718		1
	ILMN_1738699	1			1	1			ILMN_1664738		1
	ILMN_1738725	1			1	1			ILMN_1664750		1
	ILMN_1738976	1			1	1			ILMN_1664756		1
	ILMN_1739155	1			1	1			ILMN_1664761		1
	ILMN_1739257	1			1	1			ILMN_1664772		1
	ILMN_1739263	1			1	1			ILMN_1664773		1
	ILMN_1739335	1			1	1			ILMN_1664776		1
	ILMN_1739345	1			1	1			ILMN_1664798		1
	ILMN_1739423	1			1	1			ILMN_1664802		1
	ILMN_1739441	1			1	1			ILMN_1664826		1
	ILMN_1739497	1			1	1			ILMN_1664833		1
	ILMN_1739601	1			1	1			ILMN_1664855		1
	ILMN_1739641	1			1	1			ILMN_1664859		1
	ILMN_1739770	1			1	1			ILMN_1664912		1
	ILMN_1739810	1			1	1			ILMN_1664920		1
	ILMN_1739840	1			1	1			ILMN_1664921		1
	ILMN_1739847	1			1	1			ILMN_1664922		1
	ILMN_1740010	1			1	1			ILMN_1664931		1
	ILMN_1740170	1			1	1			ILMN_1664956		1
	ILMN_1740429	1			1	1			ILMN_1664978		1
	ILMN_1740842	1			1	1			ILMN_1665004		1
	ILMN_1740938	1			1	1			ILMN_1665049		1
	ILMN_1741133	1			1	1			ILMN_1665058		1
	ILMN_1741148	1			1	1			ILMN_1665066		1
	ILMN_1741253	1			1	1			ILMN_1665094		1
	ILMN_1741259	1			1	1			ILMN_1665095		1
	ILMN_1742031	1			1	1			ILMN_1665107		1
	ILMN_1742040	1			1	1			ILMN_1665117		1
	ILMN_1742069	1			1	1			ILMN_1665148		1
	ILMN_1742163	1			1	1			ILMN_1665164		1
	ILMN_1742167	1			1	1			ILMN_1665192		1
	ILMN_1742250	1			1	1			ILMN_1665205		1
	ILMN_1742456	1			1	1			ILMN_1665212		1
	ILMN_1742611	1			1	1			ILMN_1665217		1
	ILMN_1742798	1			1	1			ILMN_1665243		1
	ILMN_1742827	1			1	1			ILMN_1665280		1
	ILMN_1742887	1			1	1			ILMN_1665289		1
	ILMN_1742981	1			1	1			ILMN_1665291		1
	ILMN_1743103	1			1	1			ILMN_1665300		1
	ILMN_1743104	1			1	1			ILMN_1665331		1
	ILMN_1743137	1			1	1			ILMN_1665333		1
	ILMN_1743207	1			1	1			ILMN_1665335		1
	ILMN_1743763	1			1	1			ILMN_1665357		1
	ILMN_1744109	1			1	1			ILMN_1665384		1
	ILMN_1744347	1			1	1			ILMN_1665423		1
	ILMN_1744508	1			1	1			ILMN_1665425		1
	ILMN_1744623	1			1	1			ILMN_1665435		1
	ILMN_1744649	1			1	1			ILMN_1665455		1
	ILMN_1744822	1			1	1			ILMN_1665483		1
	ILMN_1745110	1			1	1			ILMN_1665510		1
	ILMN_1745119	1			1	1			ILMN_1665526		1
	ILMN_1745130	1			1	1			ILMN_1665538		1
	ILMN_1745271	1			1	1			ILMN_1665547		1
	ILMN_1745385	1			1	1			ILMN_1665554		1
	ILMN_1745421	1			1	1			ILMN_1665557		1
	ILMN_1745423	1			1	1			ILMN_1665571		1
	ILMN_1745593	1			1	1			ILMN_1665583		1
	ILMN_1745669	1			1	1			ILMN_1665601		1
	ILMN_1745737	1			1	1			ILMN_1665630		1
	ILMN_1745785	1			1	1			ILMN_1665686		1
	ILMN_1745885	1			1	1			ILMN_1665717		1
	ILMN_1746031	1			1	1			ILMN_1665730		1
	ILMN_1746090	1			1	1			ILMN_1665736		1
	ILMN_1746241	1			1	1			ILMN_1665737		1
	ILMN_1746252	1			1	1			ILMN_1665781		1
	ILMN_1746396	1			1	1			ILMN_1665797		1
	ILMN_1746426	1			1	1			ILMN_1665823		1
	ILMN_1746525	1			1	1			ILMN_1665831		1
	ILMN_1746598	1			1	1			ILMN_1665871		1
	ILMN_1747162	1			1	1			ILMN_1665877		1
	ILMN_1747227	1			1	1			ILMN_1665887		1
	ILMN_1747241	1			1	1			ILMN_1665909		1
	ILMN_1747281	1			1	1			ILMN_1665945		1
	ILMN_1747506	1			1	1			ILMN_1665964		1
	ILMN_1747759	1			1	1			ILMN_1665970		1
	ILMN_1748281	1			1	1			ILMN_1665982		1
	ILMN_1748283	1			1	1			ILMN_1666004		1
	ILMN_1748323	1			1	1			ILMN_1666049		1
	ILMN_1748425	1			1	1			ILMN_1666050		1
	ILMN_1748651	1			1	1			ILMN_1666057		1
	ILMN_1748767	1			1	1			ILMN_1666076		1
	ILMN_1748836	1			1	1			ILMN_1666078		1
	ILMN_1748883	1			1	1			ILMN_1666089		1
	ILMN_1748904	1			1	1			ILMN_1666096		1
	ILMN_1749083	1			1	1			ILMN_1666122		1
	ILMN_1749447	1			1	1			ILMN_1666156		1
	ILMN_1749612	1			1	1			ILMN_1666178		1
	ILMN_1749634	1			1	1			ILMN_1666192		1
	ILMN_1749662	1			1	1			ILMN_1666222		1
	ILMN_1749738	1			1	1			ILMN_1666280		1
	ILMN_1749834	1			1	1			ILMN_1666306		1
	ILMN_1749882	1			1	1			ILMN_1666364		1
	ILMN_1750079	1			1	1			ILMN_1666372		1
	ILMN_1750100	1			1	1			ILMN_1666376		1
	ILMN_1750278	1			1	1			ILMN_1666384		1
	ILMN_1750507	1			1	1			ILMN_1666385		1
	ILMN_1750624	1			1	1			ILMN_1666399		1
	ILMN_1750636	1			1	1			ILMN_1666409		1
	ILMN_1750664	1			1	1			ILMN_1666444		1
	ILMN_1750876	1			1	1			ILMN_1666445		1
	ILMN_1750901	1			1	1			ILMN_1666449		1
	ILMN_1750961	1			1	1			ILMN_1666453		1
	ILMN_1751097	1			1	1			ILMN_1666471		1
	ILMN_1751143	1			1	1			ILMN_1666477		1
	ILMN_1751351	1			1	1			ILMN_1666482		1
	ILMN_1751368	1			1	1			ILMN_1666502		1
	ILMN_1751378	1			1	1			ILMN_1666503		1
	ILMN_1751569	1			1	1			ILMN_1666512		1
	ILMN_1751607	1			1	1			ILMN_1666545		1
	ILMN_1751627	1			1	1			ILMN_1666546		1
	ILMN_1751708	1			1	1			ILMN_1666552		1
	ILMN_1751726	1			1	1			ILMN_1666553		1
	ILMN_1751904	1			1	1			ILMN_1666564		1
	ILMN_1751941	1			1	1			ILMN_1666597		1
	ILMN_1751956	1			1	1			ILMN_1666609		1
	ILMN_1752213	1			1	1			ILMN_1666615		1
	ILMN_1752299	1			1	1			ILMN_1666632		1
	ILMN_1752340	1			1	1			ILMN_1666633		1
	ILMN_1753008	1			1	1			ILMN_1666634		1
	ILMN_1753243	1			1	1			ILMN_1666635		1
	ILMN_1753613	1			1	1			ILMN_1666670		1
	ILMN_1753627	1			1	1			ILMN_1666713		1
	ILMN_1753719	1			1	1			ILMN_1666727		1
	ILMN_1753790	1			1	1			ILMN_1666733		1
	ILMN_1753925	1			1	1			ILMN_1666739		1
	ILMN_1754121	1			1	1			ILMN_1666746		1
	ILMN_1754145	1			1	1			ILMN_1666757		1
	ILMN_1754195	1			1	1			ILMN_1666761		1
	ILMN_1754234	1			1	1			ILMN_1666775		1
	ILMN_1754235	1			1	1			ILMN_1666776		1
	ILMN_1754303	1			1	1			ILMN_1666819		1
	ILMN_1754421	1			1	1			ILMN_1666853		1
	ILMN_1754660	1			1	1			ILMN_1666894		1
	ILMN_1754795	1			1	1			ILMN_1666924		1
	ILMN_1754839	1			1	1			ILMN_1666932		1
	ILMN_1754865	1			1	1			ILMN_1666933		1
	ILMN_1754990	1			1	1			ILMN_1666967		1
	ILMN_1755123	1			1	1			ILMN_1666976		1
	ILMN_1755364	1			1	1			ILMN_1667016		1
	ILMN_1755502	1			1	1			ILMN_1667022		1
	ILMN_1755733	1			1	1			ILMN_1667030		1
	ILMN_1755749	1			1	1			ILMN_1667034		1
	ILMN_1755808	1			1	1			ILMN_1667043		1
	ILMN_1755883	1			1	1			ILMN_1667050		1
	ILMN_1755954	1			1	1			ILMN_1667068		1
	ILMN_1756139	1			1	1			ILMN_1667079		1
	ILMN_1756360	1			1	1			ILMN_1667081		1
	ILMN_1756669	1			1	1			ILMN_1667086		1
	ILMN_1756674	1			1	1			ILMN_1667201		1
	ILMN_1756755	1			1	1			ILMN_1667213		1
	ILMN_1756873	1			1	1			ILMN_1667222		1
	ILMN_1756989	1			1	1			ILMN_1667239		1
	ILMN_1757343	1			1	1			ILMN_1667257		1
	ILMN_1757350	1			1	1			ILMN_1667260		1
	ILMN_1757439	1			1	1			ILMN_1667306		1
	ILMN_1757995	1			1	1			ILMN_1667319		1
	ILMN_1758543	1			1	1			ILMN_1667330		1
	ILMN_1758673	1			1	1			ILMN_1667356		1
	ILMN_1758705	1			1	1			ILMN_1667374		1
	ILMN_1758829	1			1	1			ILMN_1667381		1
	ILMN_1758846	1			1	1			ILMN_1667417		1
	ILMN_1758918	1			1	1			ILMN_1667418		1
	ILMN_1759154	1			1	1			ILMN_1667430		1
	ILMN_1759252	1			1	1			ILMN_1667432		1
	ILMN_1759330	1			1	1			ILMN_1667453		1
	ILMN_1759563	1			1	1			ILMN_1667460		1
	ILMN_1759801	1			1	1			ILMN_1667510		1
	ILMN_1759872	1			1	1			ILMN_1667519		1
	ILMN_1759952	1			1	1			ILMN_1667551		1
	ILMN_1759954	1			1	1			ILMN_1667561		1
	ILMN_1760089	1			1	1			ILMN_1667577		1
	ILMN_1760320	1			1	1			ILMN_1667578		1
	ILMN_1760338	1			1	1			ILMN_1667592		1
	ILMN_1760563	1			1	1			ILMN_1667670		1
	ILMN_1760635	1			1	1			ILMN_1667707		1
	ILMN_1760683	1			1	1			ILMN_1667711		1
	ILMN_1760714	1			1	1			ILMN_1667716		1
	ILMN_1761061	1			1	1			ILMN_1667748		1
	ILMN_1761101	1			1	1			ILMN_1667813		1
	ILMN_1761155	1			1	1			ILMN_1667839		1
	ILMN_1761175	1			1	1			ILMN_1667857		1
	ILMN_1761206	1			1	1			ILMN_1667883		1
	ILMN_1761456	1			1	1			ILMN_1667893		1
	ILMN_1761519	1			1	1			ILMN_1667925		1
	ILMN_1761566	1			1	1			ILMN_1667966		1
	ILMN_1761996	1			1	1			ILMN_1667970		1
	ILMN_1762002	1			1	1			ILMN_1667977		1
	ILMN_1762115	1			1	1			ILMN_1667994		1
	ILMN_1762225	1			1	1			ILMN_1668012		1
	ILMN_1762436	1			1	1			ILMN_1668065		1
	ILMN_1762725	1			1	1			ILMN_1668090		1
	ILMN_1762766	1			1	1			ILMN_1668185		1
	ILMN_1762899	1			1	1			ILMN_1668194		1
	ILMN_1763007	1			1	1			ILMN_1668228		1
	ILMN_1763208	1			1	1			ILMN_1668270		1
	ILMN_1763326	1			1	1			ILMN_1668283		1
	ILMN_1763447	1			1	1			ILMN_1668345		1
	ILMN_1763461	1			1	1			ILMN_1668369		1
	ILMN_1763640	1			1	1			ILMN_1668374		1
	ILMN_1763688	1			1	1			ILMN_1668408		1
	ILMN_1763694	1			1	1			ILMN_1668411		1
	ILMN_1763730	1			1	1			ILMN_1668417		1
	ILMN_1764034	1			1	1			ILMN_1668453		1
	ILMN_1764090	1			1	1			ILMN_1668463		1
	ILMN_1764096	1			1	1			ILMN_1668469		1
	ILMN_1764158	1			1	1			ILMN_1668484		1
	ILMN_1764186	1			1	1			ILMN_1668498		1
	ILMN_1764494	1			1	1			ILMN_1668507		1
	ILMN_1764573	1			1	1			ILMN_1668514		1
	ILMN_1764794	1			1	1			ILMN_1668535		1
	ILMN_1764803	1			1	1			ILMN_1668540		1
	ILMN_1765060	1			1	1			ILMN_1668582		1
	ILMN_1765076	1			1	1			ILMN_1668619		1
	ILMN_1765091	1			1	1			ILMN_1668629		1
	ILMN_1765446	1			1	1			ILMN_1668639		1
	ILMN_1765532	1			1	1			ILMN_1668721		1
	ILMN_1765578	1			1	1			ILMN_1668743		1
	ILMN_1765872	1			1	1			ILMN_1668861		1
	ILMN_1766024	1			1	1			ILMN_1668863		1
	ILMN_1766446	1			1	1			ILMN_1668960		1
	ILMN_1766499	1			1	1			ILMN_1668996		1
	ILMN_1766832	1			1	1			ILMN_1669015		1
	ILMN_1766914	1			1	1			ILMN_1669032		1
	ILMN_1767015	1			1	1			ILMN_1669033		1
	ILMN_1767139	1			1	1			ILMN_1669064		1
	ILMN_1767256	1			1	1			ILMN_1669070		1
	ILMN_1767281	1			1	1			ILMN_1669094		1
	ILMN_1767448	1			1	1			ILMN_1669113		1
	ILMN_1767892	1			1	1			ILMN_1669142		1
	ILMN_1768470	1			1	1			ILMN_1669201		1
	ILMN_1768558	1			1	1			ILMN_1669206		1
	ILMN_1768662	1			1	1			ILMN_1669215		1
	ILMN_1768870	1			1	1			ILMN_1669233		1
	ILMN_1768930	1			1	1			ILMN_1669252		1
	ILMN_1768973	1			1	1			ILMN_1669259		1
	ILMN_1769191	1			1	1			ILMN_1669268		1
	ILMN_1769250	1			1	1			ILMN_1669273		1
	ILMN_1769277	1			1	1			ILMN_1669281		1
	ILMN_1769319	1			1	1			ILMN_1669308		1
	ILMN_1769473	1			1	1			ILMN_1669310		1
	ILMN_1769926	1			1	1			ILMN_1669323		1
	ILMN_1769960	1			1	1			ILMN_1669366		1
	ILMN_1770127	1			1	1			ILMN_1669367		1
	ILMN_1770378	1			1	1			ILMN_1669376		1
	ILMN_1770454	1			1	1			ILMN_1669377		1
	ILMN_1770548	1			1	1			ILMN_1669382		1
	ILMN_1770787	1			1	1			ILMN_1669390		1
	ILMN_1770865	1			1	1			ILMN_1669394		1
	ILMN_1770911	1			1	1			ILMN_1669410		1
	ILMN_1771026	1			1	1			ILMN_1669424		1
	ILMN_1771734	1			1	1			ILMN_1669433		1
	ILMN_1771832	1			1	1			ILMN_1669484		1
	ILMN_1771966	1			1	1			ILMN_1669497		1
	ILMN_1772132	1			1	1			ILMN_1669502		1
	ILMN_1772369	1			1	1			ILMN_1669508		1
	ILMN_1772651	1			1	1			ILMN_1669516		1
	ILMN_1772677	1			1	1			ILMN_1669523		1
	ILMN_1772702	1			1	1			ILMN_1669550		1
	ILMN_1772706	1			1	1			ILMN_1669553		1
	ILMN_1772712	1			1	1			ILMN_1669555		1
	ILMN_1772796	1			1	1			ILMN_1669572		1
	ILMN_1772888	1			1	1			ILMN_1669584		1
	ILMN_1772929	1			1	1			ILMN_1669592		1
	ILMN_1772991	1			1	1			ILMN_1669598		1
	ILMN_1772998	1			1	1			ILMN_1669599		1
	ILMN_1773018	1			1	1			ILMN_1669607		1
	ILMN_1773109	1			1	1			ILMN_1669617		1
	ILMN_1773148	1			1	1			ILMN_1669631		1
	ILMN_1773154	1			1	1			ILMN_1669633		1
	ILMN_1773485	1			1	1			ILMN_1669635		1
	ILMN_1773687	1			1	1			ILMN_1669669		1
	ILMN_1773850	1			1	1			ILMN_1669674		1
	ILMN_1774062	1			1	1			ILMN_1669703		1
	ILMN_1774074	1			1	1			ILMN_1669709		1
	ILMN_1774086	1			1	1			ILMN_1669714		1
	ILMN_1774206	1			1	1			ILMN_1669718		1
	ILMN_1774661	1			1	1			ILMN_1669747		1
	ILMN_1774844	1			1	1			ILMN_1669772		1
	ILMN_1774945	1			1	1			ILMN_1669788		1
	ILMN_1775243	1			1	1			ILMN_1669818		1
	ILMN_1775448	1			1	1			ILMN_1669831		1
	ILMN_1775522	1			1	1			ILMN_1669832		1
	ILMN_1775569	1			1	1			ILMN_1669851		1
	ILMN_1775743	1			1	1			ILMN_1669878		1
	ILMN_1775762	1			1	1			ILMN_1669881		1
	ILMN_1775943	1			1	1			ILMN_1669905		1
	ILMN_1776047	1			1	1			ILMN_1669931		1
	ILMN_1776105	1			1	1			ILMN_1669940		1
	ILMN_1776216	1			1	1			ILMN_1669966		1
	ILMN_1776260	1			1	1			ILMN_1670000		1
	ILMN_1776347	1			1	1			ILMN_1670028		1
	ILMN_1776412	1			1	1			ILMN_1670037		1
	ILMN_1776879	1			1	1			ILMN_1670079		1
	ILMN_1777061	1			1	1			ILMN_1670096		1
	ILMN_1777096	1			1	1			ILMN_1670130		1
	ILMN_1777220	1			1	1			ILMN_1670134		1
	ILMN_1777296	1			1	1			ILMN_1670145		1
	ILMN_1777362	1			1	1			ILMN_1670172		1
	ILMN_1777528	1			1	1			ILMN_1670218		1
	ILMN_1777584	1			1	1			ILMN_1670263		1
	ILMN_1777721	1			1	1			ILMN_1670272		1
	ILMN_1777794	1			1	1			ILMN_1670305		1
	ILMN_1777811	1			1	1			ILMN_1670308		1
	ILMN_1777906	1			1	1			ILMN_1670331		1
	ILMN_1778104	1			1	1			ILMN_1670377		1
	ILMN_1778121	1			1	1			ILMN_1670379		1
	ILMN_1778152	1			1	1			ILMN_1670398		1
	ILMN_1778177	1			1	1			ILMN_1670420		1
	ILMN_1778381	1			1	1			ILMN_1670439		1
	ILMN_1778444	1			1	1			ILMN_1670456		1
	ILMN_1778543	1			1	1			ILMN_1670472		1
	ILMN_1778599	1			1	1			ILMN_1670490		1
	ILMN_1778617	1			1	1			ILMN_1670517		1
	ILMN_1778734	1			1	1			ILMN_1670535		1
	ILMN_1778796	1			1	1			ILMN_1670542		1
	ILMN_1778991	1			1	1			ILMN_1670561		1
	ILMN_1779071	1			1	1			ILMN_1670572		1
	ILMN_1779171	1			1	1			ILMN_1670609		1
	ILMN_1779228	1			1	1			ILMN_1670638		1
	ILMN_1779376	1			1	1			ILMN_1670640		1
	ILMN_1779648	1			1	1			ILMN_1670718		1
	ILMN_1779751	1			1	1			ILMN_1670723		1
	ILMN_1779852	1			1	1			ILMN_1670752		1
	ILMN_1779857	1			1	1			ILMN_1670796		1
	ILMN_1780057	1			1	1			ILMN_1670801		1
	ILMN_1780189	1			1	1			ILMN_1670807		1
	ILMN_1780502	1			1	1			ILMN_1670817		1
	ILMN_1780699	1			1	1			ILMN_1670841		1
	ILMN_1780887	1			1	1			ILMN_1670870		1
	ILMN_1781099	1			1	1			ILMN_1670875		1
	ILMN_1781104	1			1	1			ILMN_1670895		1
	ILMN_1781151	1			1	1			ILMN_1670901		1
	ILMN_1781419	1			1	1			ILMN_1670925		1
	ILMN_1781601	1			1	1			ILMN_1670926		1
	ILMN_1781623	1			1	1			ILMN_1670931		1
	ILMN_1781803	1			1	1			ILMN_1670932		1
	ILMN_1781987	1			1	1			ILMN_1670948		1
	ILMN_1781999	1			1	1			ILMN_1670970		1
	ILMN_1782032	1			1	1			ILMN_1671004		1
	ILMN_1782094	1			1	1			ILMN_1671005		1
	ILMN_1782095	1			1	1			ILMN_1671028		1
	ILMN_1782257	1			1	1			ILMN_1671045		1
	ILMN_1782417	1			1	1			ILMN_1671054		1
	ILMN_1782488	1			1	1			ILMN_1671076		1
	ILMN_1782538	1			1	1			ILMN_1671114		1
	ILMN_1782551	1			1	1			ILMN_1671116		1
	ILMN_1782609	1			1	1			ILMN_1671152		1
	ILMN_1782611	1			1	1			ILMN_1671158		1
	ILMN_1782621	1			1	1			ILMN_1671191		1
	ILMN_1782633	1			1	1			ILMN_1671207		1
	ILMN_1782890	1			1	1			ILMN_1671217		1
	ILMN_1782897	1			1	1			ILMN_1671221		1
	ILMN_1782939	1			1	1			ILMN_1671257		1
	ILMN_1782977	1			1	1			ILMN_1671260		1
	ILMN_1783120	1			1	1			ILMN_1671263		1
	ILMN_1783226	1			1	1			ILMN_1671265		1
	ILMN_1783448	1			1	1			ILMN_1671281		1
	ILMN_1783684	1			1	1			ILMN_1671288		1
	ILMN_1783712	1			1	1			ILMN_1671291		1
	ILMN_1783806	1			1	1			ILMN_1671295		1
	ILMN_1783873	1			1	1			ILMN_1671314		1
	ILMN_1783985	1			1	1			ILMN_1671326		1
	ILMN_1784227	1			1	1			ILMN_1671372		1
	ILMN_1784299	1			1	1			ILMN_1671374		1
	ILMN_1784408	1			1	1			ILMN_1671392		1
	ILMN_1784410	1			1	1			ILMN_1671404		1
	ILMN_1784540	1			1	1			ILMN_1671452		1
	ILMN_1784655	1			1	1			ILMN_1671478		1
	ILMN_1784706	1			1	1			ILMN_1671486		1
	ILMN_1784717	1			1	1			ILMN_1671489		1
	ILMN_1784780	1			1	1			ILMN_1671494		1
	ILMN_1785324	1			1	1			ILMN_1671516		1
	ILMN_1785574	1			1	1			ILMN_1671554		1
	ILMN_1785646	1			1	1			ILMN_1671565		1
	ILMN_1785661	1			1	1			ILMN_1671583		1
	ILMN_1785919	1			1	1			ILMN_1671603		1
	ILMN_1786347	1			1	1			ILMN_1671621		1
	ILMN_1786684	1			1	1			ILMN_1671661		1
	ILMN_1786718	1			1	1			ILMN_1671693		1
	ILMN_1786722	1			1	1			ILMN_1671703		1
	ILMN_1786759	1			1	1			ILMN_1671728		1
	ILMN_1787567	1			1	1			ILMN_1671731		1
	ILMN_1787591	1			1	1			ILMN_1671765		1
	ILMN_1787628	1			1	1			ILMN_1671766		1
	ILMN_1787680	1			1	1			ILMN_1671777		1
	ILMN_1787949	1			1	1			ILMN_1671800		1
	ILMN_1788108	1			1	1			ILMN_1671809		1
	ILMN_1788109	1			1	1			ILMN_1671837		1
	ILMN_1788387	1			1	1			ILMN_1671839		1
	ILMN_1788416	1			1	1			ILMN_1671843		1
	ILMN_1788759	1			1	1			ILMN_1671885		1
	ILMN_1788813	1			1	1			ILMN_1671891		1
	ILMN_1788887	1			1	1			ILMN_1671893		1
	ILMN_1788955	1			1	1			ILMN_1671895		1
	ILMN_1788961	1			1	1			ILMN_1671905		1
	ILMN_1789136	1			1	1			ILMN_1671911		1
	ILMN_1789176	1			1	1			ILMN_1671928		1
	ILMN_1789240	1			1	1			ILMN_1671932		1
	ILMN_1789283	1			1	1			ILMN_1671933		1
	ILMN_1789492	1			1	1			ILMN_1671935		1
	ILMN_1789510	1			1	1			ILMN_1672004		1
	ILMN_1789614	1			1	1			ILMN_1672006		1
	ILMN_1789733	1			1	1			ILMN_1672009		1
	ILMN_1789786	1			1	1			ILMN_1672022		1
	ILMN_1789809	1			1	1			ILMN_1672024		1
	ILMN_1790106	1			1	1			ILMN_1672042		1
	ILMN_1790253	1			1	1			ILMN_1672080		1
	ILMN_1790354	1			1	1			ILMN_1672121		1
	ILMN_1790461	1			1	1			ILMN_1672122		1
	ILMN_1790953	1			1	1			ILMN_1672124		1
	ILMN_1791097	1			1	1			ILMN_1672128		1
	ILMN_1791149	1			1	1			ILMN_1672135		1
	ILMN_1791328	1			1	1			ILMN_1672149		1
	ILMN_1791702	1			1	1			ILMN_1672191		1
	ILMN_1791771	1			1	1			ILMN_1672287		1
	ILMN_1791827	1			1	1			ILMN_1672331		1
	ILMN_1791867	1			1	1			ILMN_1672350		1
	ILMN_1791884	1			1	1			ILMN_1672366		1
	ILMN_1792176	1			1	1			ILMN_1672367		1
	ILMN_1792314	1			1	1			ILMN_1672405		1
	ILMN_1792455	1			1	1			ILMN_1672443		1
	ILMN_1792497	1			1	1			ILMN_1672446		1
	ILMN_1792528	1			1	1			ILMN_1672486		1
	ILMN_1792860	1			1	1			ILMN_1672496		1
	ILMN_1792910	1			1	1			ILMN_1672503		1
	ILMN_1793033	1			1	1			ILMN_1672504		1
	ILMN_1793386	1			1	1			ILMN_1672536		1
	ILMN_1793430	1			1	1			ILMN_1672547		1
	ILMN_1793433	1			1	1			ILMN_1672554		1
	ILMN_1793598	1			1	1			ILMN_1672565		1
	ILMN_1793673	1			1	1			ILMN_1672571		1
	ILMN_1793712	1			1	1			ILMN_1672589		1
	ILMN_1793724	1			1	1			ILMN_1672591		1
	ILMN_1793859	1			1	1			ILMN_1672596		1
	ILMN_1794056	1			1	1			ILMN_1672605		1
	ILMN_1794070	1			1	1			ILMN_1672611		1
	ILMN_1794132	1			1	1			ILMN_1672650		1
	ILMN_1794392	1			1	1			ILMN_1672661		1
	ILMN_1794492	1			1	1			ILMN_1672662		1
	ILMN_1794552	1			1	1			ILMN_1672687		1
	ILMN_1794863	1			1	1			ILMN_1672717		1
	ILMN_1794914	1			1	1			ILMN_1672728		1
	ILMN_1794927	1			1	1			ILMN_1672755		1
	ILMN_1795159	1			1	1			ILMN_1672759		1
	ILMN_1795227	1			1	1			ILMN_1672830		1
	ILMN_1795228	1			1	1			ILMN_1672834		1
	ILMN_1795243	1			1	1			ILMN_1672843		1
	ILMN_1795251	1			1	1			ILMN_1672878		1
	ILMN_1795341	1			1	1			ILMN_1672884		1
	ILMN_1795474	1			1	1			ILMN_1672947		1
	ILMN_1796063	1			1	1			ILMN_1672961		1
	ILMN_1796099	1			1	1			ILMN_1673023		1
	ILMN_1796245	1			1	1			ILMN_1673024		1
	ILMN_1796339	1			1	1			ILMN_1673026		1
	ILMN_1796417	1			1	1			ILMN_1673069		1
	ILMN_1796458	1			1	1			ILMN_1673111		1
	ILMN_1796490	1			1	1			ILMN_1673138		1
	ILMN_1796543	1			1	1			ILMN_1673172		1
	ILMN_1796751	1			1	1			ILMN_1673185		1
	ILMN_1796926	1			1	1			ILMN_1673215		1
	ILMN_1796962	1			1	1			ILMN_1673232		1
	ILMN_1797201	1			1	1			ILMN_1673252		1
	ILMN_1797341	1			1	1			ILMN_1673275		1
	ILMN_1797668	1			1	1			ILMN_1673282		1
	ILMN_1797684	1			1	1			ILMN_1673305		1
	ILMN_1798123	1			1	1			ILMN_1673352		1
	ILMN_1798129	1			1	1			ILMN_1673363		1
	ILMN_1798254	1			1	1			ILMN_1673369		1
	ILMN_1798354	1			1	1			ILMN_1673370		1
	ILMN_1798380	1			1	1			ILMN_1673376		1
	ILMN_1798458	1			1	1			ILMN_1673409		1
	ILMN_1798485	1			1	1			ILMN_1673421		1
	ILMN_1798874	1			1	1			ILMN_1673450		1
	ILMN_1798885	1			1	1			ILMN_1673478		1
	ILMN_1799015	1			1	1			ILMN_1673509		1
	ILMN_1799207	1			1	1			ILMN_1673518		1
	ILMN_1799728	1			1	1			ILMN_1673529		1
	ILMN_1799814	1			1	1			ILMN_1673544		1
	ILMN_1799837	1			1	1			ILMN_1673566		1
	ILMN_1799856	1			1	1			ILMN_1673604		1
	ILMN_1799860	1			1	1			ILMN_1673637		1
	ILMN_1800131	1			1	1			ILMN_1673638		1
	ILMN_1800308	1			1	1			ILMN_1673649		1
	ILMN_1800461	1			1	1			ILMN_1673681		1
	ILMN_1800543	1			1	1			ILMN_1673682		1
	ILMN_1800837	1			1	1			ILMN_1673704		1
	ILMN_1800897	1			1	1			ILMN_1673711		1
	ILMN_1800952	1			1	1			ILMN_1673738		1
	ILMN_1801246	1			1	1			ILMN_1673746		1
	ILMN_1801403	1			1	1			ILMN_1673752		1
	ILMN_1801633	1			1	1			ILMN_1673773		1
	ILMN_1801703	1			1	1			ILMN_1673788		1
	ILMN_1801795	1			1	1			ILMN_1673795		1
	ILMN_1801852	1			1	1			ILMN_1673798		1
	ILMN_1801905	1			1	1			ILMN_1673820		1
	ILMN_1801931	1			1	1			ILMN_1673899		1
	ILMN_1802355	1			1	1			ILMN_1673933		1
	ILMN_1802434	1			1	1			ILMN_1673936		1
	ILMN_1802611	1			1	1			ILMN_1673944		1
	ILMN_1802669	1			1	1			ILMN_1673950		1
	ILMN_1802706	1			1	1			ILMN_1673962		1
	ILMN_1802905	1			1	1			ILMN_1673966		1
	ILMN_1803073	1			1	1			ILMN_1673991		1
	ILMN_1803162	1			1	1			ILMN_1674032		1
	ILMN_1803254	1			1	1			ILMN_1674038		1
	ILMN_1803454	1			1	1			ILMN_1674046		1
	ILMN_1803597	1			1	1			ILMN_1674050		1
	ILMN_1803624	1			1	1			ILMN_1674069		1
	ILMN_1803743	1			1	1			ILMN_1674135		1
	ILMN_1803799	1			1	1			ILMN_1674160		1
	ILMN_1803882	1			1	1			ILMN_1674236		1
	ILMN_1803995	1			1	1			ILMN_1674243		1
	ILMN_1804148	1			1	1			ILMN_1674282		1
	ILMN_1804277	1			1	1			ILMN_1674302		1
	ILMN_1804332	1			1	1			ILMN_1674334		1
	ILMN_1804339	1			1	1			ILMN_1674337		1
	ILMN_1804396	1			1	1			ILMN_1674380		1
	ILMN_1804476	1			1	1			ILMN_1674385		1
	ILMN_1804679	1			1	1			ILMN_1674394		1
	ILMN_1804938	1			1	1			ILMN_1674399		1
	ILMN_1805111	1			1	1			ILMN_1674421		1
	ILMN_1805132	1			1	1			ILMN_1674458		1
	ILMN_1805216	1			1	1			ILMN_1674506		1
	ILMN_1805251	1			1	1			ILMN_1674522		1
	ILMN_1805330	1			1	1			ILMN_1674551		1
	ILMN_1805344	1			1	1			ILMN_1674560		1
	ILMN_1805345	1			1	1			ILMN_1674580		1
	ILMN_1805448	1			1	1			ILMN_1674609		1
	ILMN_1805662	1			1	1			ILMN_1674620		1
	ILMN_1805792	1			1	1			ILMN_1674661		1
	ILMN_1805827	1			1	1			ILMN_1674665		1
	ILMN_1805973	1			1	1			ILMN_1674698		1
	ILMN_1806123	1			1	1			ILMN_1674706		1
	ILMN_1806294	1			1	1			ILMN_1674768		1
	ILMN_1806306	1			1	1			ILMN_1674795		1
	ILMN_1806612	1			1	1			ILMN_1674855		1
	ILMN_1806692	1			1	1			ILMN_1674866		1
	ILMN_1806818	1			1	1			ILMN_1674874		1
	ILMN_1806867	1			1	1			ILMN_1674908		1
	ILMN_1807042	1			1	1			ILMN_1674941		1
	ILMN_1807074	1			1	1			ILMN_1674983		1
	ILMN_1807455	1			1	1			ILMN_1674985		1
	ILMN_1807535	1			1	1			ILMN_1675024		1
	ILMN_1807556	1			1	1			ILMN_1675038		1
	ILMN_1807710	1			1	1			ILMN_1675055		1
	ILMN_1807767	1			1	1			ILMN_1675062		1
	ILMN_1807833	1			1	1			ILMN_1675083		1
	ILMN_1808110	1			1	1			ILMN_1675085		1
	ILMN_1808272	1			1	1			ILMN_1675117		1
	ILMN_1808305	1			1	1			ILMN_1675131		1
	ILMN_1808457	1			1	1			ILMN_1675156		1
	ILMN_1808566	1			1	1			ILMN_1675186		1
	ILMN_1808587	1			1	1			ILMN_1675222		1
	ILMN_1808707	1			1	1			ILMN_1675239		1
	ILMN_1808783	1			1	1			ILMN_1675266		1
	ILMN_1808837	1			1	1			ILMN_1675268		1
	ILMN_1808860	1			1	1			ILMN_1675359		1
	ILMN_1808984	1			1	1			ILMN_1675365		1
	ILMN_1809013	1			1	1			ILMN_1675387		1
	ILMN_1809347	1			1	1			ILMN_1675406		1
	ILMN_1809439	1			1	1			ILMN_1675421		1
	ILMN_1809488	1			1	1			ILMN_1675448		1
	ILMN_1809583	1			1	1			ILMN_1675460		1
	ILMN_1809695	1			1	1			ILMN_1675462		1
	ILMN_1809818	1			1	1			ILMN_1675472		1
	ILMN_1809957	1			1	1			ILMN_1675482		1
	ILMN_1810214	1			1	1			ILMN_1675483		1
	ILMN_1810327	1			1	1			ILMN_1675501		1
	ILMN_1810423	1			1	1			ILMN_1675542		1
	ILMN_1810441	1			1	1			ILMN_1675577		1
	ILMN_1810467	1			1	1			ILMN_1675612		1
	ILMN_1810486	1			1	1			ILMN_1675632		1
	ILMN_1810577	1			1	1			ILMN_1675669		1
	ILMN_1810759	1			1	1			ILMN_1675671		1
	ILMN_1810810	1			1	1			ILMN_1675674		1
	ILMN_1810852	1			1	1			ILMN_1675684		1
	ILMN_1810915	1			1	1			ILMN_1675693		1
	ILMN_1811188	1			1	1			ILMN_1675695		1
	ILMN_1811560	1			1	1			ILMN_1675709		1
	ILMN_1811592	1			1	1			ILMN_1675788		1
	ILMN_1811909	1			1	1			ILMN_1675797		1
	ILMN_1811972	1			1	1			ILMN_1675803		1
	ILMN_1812031	1			1	1			ILMN_1675848		1
	ILMN_1812236	1			1	1			ILMN_1675852		1
	ILMN_1812262	1			1	1			ILMN_1675939		1
	ILMN_1812312	1			1	1			ILMN_1675947		1
	ILMN_1812392	1			1	1			ILMN_1675982		1
	ILMN_1812474	1			1	1			ILMN_1676002		1
	ILMN_1812503	1			1	1			ILMN_1676003		1
	ILMN_1812638	1			1	1			ILMN_1676005		1
	ILMN_1812769	1			1	1			ILMN_1676010		1
	ILMN_1813240	1			1	1			ILMN_1676014		1
	ILMN_1813489	1			1	1			ILMN_1676026		1
	ILMN_1813572	1			1	1			ILMN_1676036		1
	ILMN_1813604	1			1	1			ILMN_1676062		1
	ILMN_1813650	1			1	1			ILMN_1676075		1
	ILMN_1813657	1			1	1			ILMN_1676088		1
	ILMN_1813836	1			1	1			ILMN_1676091		1
	ILMN_1814011	1			1	1			ILMN_1676197		1
	ILMN_1814173	1			1	1			ILMN_1676280		1
	ILMN_1814194	1			1	1			ILMN_1676289		1
	ILMN_1814787	1			1	1			ILMN_1676302		1
	ILMN_1814789	1			1	1			ILMN_1676336		1
	ILMN_1814823	1			1	1			ILMN_1676358		1
	ILMN_1814998	1			1	1			ILMN_1676361		1
	ILMN_1815010	1			1	1			ILMN_1676393		1
	ILMN_1815024	1			1	1			ILMN_1676413		1
	ILMN_1815079	1			1	1			ILMN_1676423		1
	ILMN_1815107	1			1	1			ILMN_1676448		1
	ILMN_1815154	1			1	1			ILMN_1676449		1
	ILMN_1815158	1			1	1			ILMN_1676503		1
	ILMN_1815239	1			1	1			ILMN_1676515		1
	ILMN_1815292	1			1	1			ILMN_1676523		1
	ILMN_1815392	1			1	1			ILMN_1676548		1
	ILMN_1815570	1			1	1			ILMN_1676563		1
	ILMN_1815626	1			1	1			ILMN_1676588		1
	ILMN_1815635	1			1	1			ILMN_1676600		1
	ILMN_1815745	1			1	1			ILMN_1676611		1
	ILMN_1815859	1			1	1			ILMN_1676616		1
	ILMN_1815874	1			1	1			ILMN_1676625		1
	ILMN_1815878	1			1	1			ILMN_1676629		1
	ILMN_1815924	1			1	1			ILMN_1676665		1
	ILMN_1816157	1			1	1			ILMN_1676719		1
	ILMN_1817255	1			1	1			ILMN_1676745		1
	ILMN_1819805	1			1	1			ILMN_1676763		1
	ILMN_1821280	1			1	1			ILMN_1676765		1
	ILMN_1821681	1			1	1			ILMN_1676792		1
	ILMN_1822327	1			1	1			ILMN_1676799		1
	ILMN_1826531	1			1	1			ILMN_1676842		1
	ILMN_1831098	1			1	1			ILMN_1676844		1
	ILMN_1831826	1			1	1			ILMN_1676846		1
	ILMN_1833478	1			1	1			ILMN_1676880		1
	ILMN_1833964	1			1	1			ILMN_1676891		1
	ILMN_1834803	1			1	1			ILMN_1676893		1
	ILMN_1836309	1			1	1			ILMN_1676899		1
	ILMN_1847473	1			1	1			ILMN_1676905		1
	ILMN_1848461	1			1	1			ILMN_1676946		1
	ILMN_1848552	1			1	1			ILMN_1676955		1
	ILMN_1851453	1			1	1			ILMN_1676980		1
	ILMN_1857768	1			1	1			ILMN_1676984		1
	ILMN_1859531	1			1	1			ILMN_1676986		1
	ILMN_1859942	1			1	1			ILMN_1677041		1
	ILMN_1860084	1			1	1			ILMN_1677043		1
	ILMN_1862018	1			1	1			ILMN_1677080		1
	ILMN_1863939	1			1	1			ILMN_1677085		1
	ILMN_1865013	1			1	1			ILMN_1677092		1
	ILMN_1865069	1			1	1			ILMN_1677113		1
	ILMN_1866255	1			1	1			ILMN_1677122		1
	ILMN_1867439	1			1	1			ILMN_1677133		1
	ILMN_1869109	1			1	1			ILMN_1677138		1
	ILMN_1870621	1			1	1			ILMN_1677200		1
	ILMN_1870671	1			1	1			ILMN_1677228		1
	ILMN_1871756	1			1	1			ILMN_1677237		1
	ILMN_1872122	1			1	1			ILMN_1677239		1
	ILMN_1873540	1			1	1			ILMN_1677262		1
	ILMN_1874095	1			1	1			ILMN_1677273		1
	ILMN_1875887	1			1	1			ILMN_1677292		1
	ILMN_1876838	1			1	1			ILMN_1677303		1
	ILMN_1879482	1			1	1			ILMN_1677305		1
	ILMN_1880103	1			1	1			ILMN_1677376		1
	ILMN_1880340	1			1	1			ILMN_1677385		1
	ILMN_1880406	1			1	1			ILMN_1677396		1
	ILMN_1880704	1			1	1			ILMN_1677402		1
	ILMN_1880761	1			1	1			ILMN_1677404		1
	ILMN_1881909	1			1	1			ILMN_1677432		1
	ILMN_1882560	1			1	1			ILMN_1677440		1
	ILMN_1886493	1			1	1			ILMN_1677446		1
	ILMN_1888264	1			1	1			ILMN_1677452		1
	ILMN_1891324	1			1	1			ILMN_1677483		1
	ILMN_1898362	1			1	1			ILMN_1677484		1
	ILMN_1900929	1			1	1			ILMN_1677487		1
	ILMN_1902949	1			1	1			ILMN_1677530		1
	ILMN_1903345	1			1	1			ILMN_1677532		1
	ILMN_1906743	1			1	1			ILMN_1677534		1
	ILMN_1907620	1			1	1			ILMN_1677607		1
	ILMN_1907705	1			1	1			ILMN_1677691		1
	ILMN_1909073	1			1	1			ILMN_1677697		1
	ILMN_1911361	1			1	1			ILMN_1677719		1
	ILMN_1915188	1			1	1			ILMN_1677765		1
	ILMN_1915345	1			1	1			ILMN_1677768		1
	ILMN_1917338	1			1	1			ILMN_1677800		1
	ILMN_2038772	1			1	1			ILMN_1677824		1
	ILMN_2038773	1			1	1			ILMN_1677829		1
	ILMN_2038774	1			1	1			ILMN_1677843		1
	ILMN_2038778	1			1	1			ILMN_1677868		1
	ILMN_2041161	1			1	1			ILMN_1677877		1
	ILMN_2041368	1			1	1			ILMN_1677887		1
	ILMN_2044617	1			1	1			ILMN_1677906		1
	ILMN_2045729	1			1	1			ILMN_1677919		1
	ILMN_2046896	1			1	1			ILMN_1677942		1
	ILMN_2047240	1			1	1			ILMN_1677953		1
	ILMN_2048326	1			1	1			ILMN_1677962		1
	ILMN_2050112	1			1	1			ILMN_1677963		1
	ILMN_2050434	1			1	1			ILMN_1677968		1
	ILMN_2051519	1			1	1			ILMN_1678004		1
	ILMN_2052163	1			1	1			ILMN_1678032		1
	ILMN_2052383	1			1	1			ILMN_1678037		1
	ILMN_2052891	1			1	1			ILMN_1678052		1
	ILMN_2053415	1			1	1			ILMN_1678075		1
	ILMN_2053546	1			1	1			ILMN_1678080		1
	ILMN_2054362	1			1	1			ILMN_1678087		1
	ILMN_2054928	1			1	1			ILMN_1678140		1
	ILMN_2058070	1			1	1			ILMN_1678143		1
	ILMN_2058251	1			1	1			ILMN_1678165		1
	ILMN_2060413	1			1	1			ILMN_1678203		1
	ILMN_2061446	1			1	1			ILMN_1678215		1
	ILMN_2066858	1			1	1			ILMN_1678235		1
	ILMN_2070210	1			1	1			ILMN_1678268		1
	ILMN_2072296	1			1	1			ILMN_1678290		1
	ILMN_2072401	1			1	1			ILMN_1678300		1
	ILMN_2073235	1			1	1			ILMN_1678323		1
	ILMN_2073289	1			1	1			ILMN_1678353		1
	ILMN_2074258	1			1	1			ILMN_1678362		1
	ILMN_2074860	1			1	1			ILMN_1678403		1
	ILMN_2076658	1			1	1			ILMN_1678423		1
	ILMN_2078334	1			1	1			ILMN_1678457		1
	ILMN_2079004	1			1	1			ILMN_1678490		1
	ILMN_2080760	1			1	1			ILMN_1678493		1
	ILMN_2081682	1			1	1			ILMN_1678494		1
	ILMN_2083593	1			1	1			ILMN_1678504		1
	ILMN_2085760	1			1	1			ILMN_1678522		1
	ILMN_2085922	1			1	1			ILMN_1678546		1
	ILMN_2086064	1			1	1			ILMN_1678579		1
	ILMN_2086417	1			1	1			ILMN_1678605		1
	ILMN_2087941	1			1	1			ILMN_1678612		1
	ILMN_2089329	1			1	1			ILMN_1678618		1
	ILMN_2090949	1			1	1			ILMN_1678629		1
	ILMN_2092536	1			1	1			ILMN_1678652		1
	ILMN_2093674	1			1	1			ILMN_1678671		1
	ILMN_2094106	1			1	1			ILMN_1678678		1
	ILMN_2094718	1			1	1			ILMN_1678692		1
	ILMN_2094776	1			1	1			ILMN_1678707		1
	ILMN_2096116	1			1	1			ILMN_1678710		1
	ILMN_2096719	1			1	1			ILMN_1678729		1
	ILMN_2097421	1			1	1			ILMN_1678730		1
	ILMN_2097954	1			1	1			ILMN_1678754		1
	ILMN_2099586	1			1	1			ILMN_1678757		1
	ILMN_2099783	1			1	1			ILMN_1678766		1
	ILMN_2101651	1			1	1			ILMN_1678775		1
	ILMN_2101920	1			1	1			ILMN_1678781		1
	ILMN_2101930	1			1	1			ILMN_1678788		1
	ILMN_2103761	1			1	1			ILMN_1678805		1
	ILMN_2104295	1			1	1			ILMN_1678808		1
	ILMN_2104784	1			1	1			ILMN_1678814		1
	ILMN_2105033	1			1	1			ILMN_1678862		1
	ILMN_2106331	1			1	1			ILMN_1678904		1
	ILMN_2108823	1			1	1			ILMN_1678919		1
	ILMN_2110532	1			1	1			ILMN_1678922		1
	ILMN_2110829	1			1	1			ILMN_1678928		1
	ILMN_2112417	1			1	1			ILMN_1678934		1
	ILMN_2114876	1			1	1			ILMN_1678957		1
	ILMN_2115949	1			1	1			ILMN_1678961		1
	ILMN_2116366	1			1	1			ILMN_1678962		1
	ILMN_2117171	1			1	1			ILMN_1678966		1
	ILMN_2120340	1			1	1			ILMN_1678998		1
	ILMN_2121437	1			1	1			ILMN_1679025		1
	ILMN_2122374	1			1	1			ILMN_1679045		1
	ILMN_2122926	1			1	1			ILMN_1679071		1
	ILMN_2124352	1			1	1			ILMN_1679083		1
	ILMN_2124757	1			1	1			ILMN_1679092		1
	ILMN_2124769	1			1	1			ILMN_1679093		1
	ILMN_2124951	1			1	1			ILMN_1679134		1
	ILMN_2127328	1			1	1			ILMN_1679177		1
	ILMN_2128128	1			1	1			ILMN_1679178		1
	ILMN_2129927	1			1	1			ILMN_1679185		1
	ILMN_2131392	1			1	1			ILMN_1679188		1
	ILMN_2131880	1			1	1			ILMN_1679195		1
	ILMN_2132599	1			1	1			ILMN_1679209		1
	ILMN_2134039	1			1	1			ILMN_1679217		1
	ILMN_2134110	1			1	1			ILMN_1679232		1
	ILMN_2134453	1			1	1			ILMN_1679238		1
	ILMN_2136133	1			1	1			ILMN_1679256		1
	ILMN_2139943	1			1	1			ILMN_1679262		1
	ILMN_2140999	1			1	1			ILMN_1679268		1
	ILMN_2141157	1			1	1			ILMN_1679280		1
	ILMN_2141444	1			1	1			ILMN_1679299		1
	ILMN_2142979	1			1	1			ILMN_1679311		1
	ILMN_2143822	1			1	1			ILMN_1679324		1
	ILMN_2144573	1			1	1			ILMN_1679358		1
	ILMN_2145153	1			1	1			ILMN_1679382		1
	ILMN_2145997	1			1	1			ILMN_1679405		1
	ILMN_2148469	1			1	1			ILMN_1679428		1
	ILMN_2148819	1			1	1			ILMN_1679450		1
	ILMN_2148847	1			1	1			ILMN_1679460		1
	ILMN_2150258	1			1	1			ILMN_1679476		1
	ILMN_2150294	1			1	1			ILMN_1679483		1
	ILMN_2151048	1			1	1			ILMN_1679495		1
	ILMN_2151817	1			1	1			ILMN_1679520		1
	ILMN_2154566	1			1	1			ILMN_1679543		1
	ILMN_2154654	1			1	1			ILMN_1679555		1
	ILMN_2154671	1			1	1			ILMN_1679580		1
	ILMN_2155998	1			1	1			ILMN_1679587		1
	ILMN_2157421	1			1	1			ILMN_1679600		1
	ILMN_2157510	1			1	1			ILMN_1679614		1
	ILMN_2158548	1			1	1			ILMN_1679640		1
	ILMN_2160388	1			1	1			ILMN_1679641		1
	ILMN_2160819	1			1	1			ILMN_1679655		1
	ILMN_2163306	1			1	1			ILMN_1679700		1
	ILMN_2166831	1			1	1			ILMN_1679725		1
	ILMN_2166865	1			1	1			ILMN_1679727		1
	ILMN_2167616	1			1	1			ILMN_1679731		1
	ILMN_2168449	1			1	1			ILMN_1679754		1
	ILMN_2170813	1			1	1			ILMN_1679771		1
	ILMN_2173611	1			1	1			ILMN_1679782		1
	ILMN_2173835	1			1	1			ILMN_1679796		1
	ILMN_2173909	1			1	1			ILMN_1679797		1
	ILMN_2174574	1			1	1			ILMN_1679800		1
	ILMN_2175601	1			1	1			ILMN_1679809		1
	ILMN_2175894	1			1	1			ILMN_1679826		1
	ILMN_2176882	1			1	1			ILMN_1679838		1
	ILMN_2180682	1			1	1			ILMN_1679867		1
	ILMN_2180866	1			1	1			ILMN_1679881		1
	ILMN_2181540	1			1	1			ILMN_1679912		1
	ILMN_2182750	1			1	1			ILMN_1679917		1
	ILMN_2183510	1			1	1			ILMN_1679919		1
	ILMN_2185845	1			1	1			ILMN_1679920		1
	ILMN_2188521	1			1	1			ILMN_1679929		1
	ILMN_2191331	1			1	1			ILMN_1679949		1
	ILMN_2191428	1			1	1			ILMN_1679978		1
	ILMN_2191568	1			1	1			ILMN_1679984		1
	ILMN_2192316	1			1	1			ILMN_1680010		1
	ILMN_2192693	1			1	1			ILMN_1680037		1
	ILMN_2192694	1			1	1			ILMN_1680072		1
	ILMN_2193214	1			1	1			ILMN_1680091		1
	ILMN_2196347	1			1	1			ILMN_1680104		1
	ILMN_2199313	1			1	1			ILMN_1680109		1
	ILMN_2200636	1			1	1			ILMN_1680129		1
	ILMN_2201533	1			1	1			ILMN_1680130		1
	ILMN_2201668	1			1	1			ILMN_1680132		1
	ILMN_2203463	1			1	1			ILMN_1680134		1
	ILMN_2204876	1			1	1			ILMN_1680171		1
	ILMN_2204909	1			1	1			ILMN_1680193		1
	ILMN_2205032	1			1	1			ILMN_1680196		1
	ILMN_2205050	1			1	1			ILMN_1680208		1
	ILMN_2205211	1			1	1			ILMN_1680223		1
	ILMN_2206344	1			1	1			ILMN_1680239		1
	ILMN_2207363	1			1	1			ILMN_1680251		1
	ILMN_2207533	1			1	1			ILMN_1680279		1
	ILMN_2207539	1			1	1			ILMN_1680313		1
	ILMN_2208373	1			1	1			ILMN_1680314		1
	ILMN_2209027	1			1	1			ILMN_1680341		1
	ILMN_2210386	1			1	1			ILMN_1680347		1
	ILMN_2211724	1			1	1			ILMN_1680353		1
	ILMN_2211780	1			1	1			ILMN_1680367		1
	ILMN_2211800	1			1	1			ILMN_1680378		1
	ILMN_2214734	1			1	1			ILMN_1680386		1
	ILMN_2214997	1			1	1			ILMN_1680388		1
	ILMN_2215640	1			1	1			ILMN_1680390		1
	ILMN_2215656	1			1	1			ILMN_1680403		1
	ILMN_2217329	1			1	1			ILMN_1680434		1
	ILMN_2218450	1			1	1			ILMN_1680436		1
	ILMN_2219134	1			1	1			ILMN_1680437		1
	ILMN_2220518	1			1	1			ILMN_1680453		1
	ILMN_2220845	1			1	1			ILMN_1680501		1
	ILMN_2221564	1			1	1			ILMN_1680579		1
	ILMN_2221673	1			1	1			ILMN_1680591		1
	ILMN_2222074	1			1	1			ILMN_1680618		1
	ILMN_2222234	1			1	1			ILMN_1680624		1
	ILMN_2222688	1			1	1			ILMN_1680626		1
	ILMN_2222750	1			1	1			ILMN_1680644		1
	ILMN_2224444	1			1	1			ILMN_1680659		1
	ILMN_2224833	1			1	1			ILMN_1680673		1
	ILMN_2225318	1			1	1			ILMN_1680675		1
	ILMN_2228710	1			1	1			ILMN_1680687		1
	ILMN_2229242	1			1	1			ILMN_1680692		1
	ILMN_2230624	1			1	1			ILMN_1680693		1
	ILMN_2231911	1			1	1			ILMN_1680703		1
	ILMN_2234016	1			1	1			ILMN_1680727		1
	ILMN_2234758	1			1	1			ILMN_1680738		1
	ILMN_2247594	1			1	1			ILMN_1680757		1
	ILMN_2249920	1			1	1			ILMN_1680770		1
	ILMN_2251184	1			1	1			ILMN_1680774		1
	ILMN_2263054	1			1	1			ILMN_1680781		1
	ILMN_2264625	1			1	1			ILMN_1680782		1
	ILMN_2266214	1			1	1			ILMN_1680831		1
	ILMN_2269136	1			1	1			ILMN_1680840		1
	ILMN_2276758	1			1	1			ILMN_1680850		1
	ILMN_2278908	1			1	1			ILMN_1680856		1
	ILMN_2279367	1			1	1			ILMN_1680860		1
	ILMN_2279635	1			1	1			ILMN_1680867		1
	ILMN_2279834	1			1	1			ILMN_1680874		1
	ILMN_2281128	1			1	1			ILMN_1680899		1
	ILMN_2281786	1			1	1			ILMN_1680925		1
	ILMN_2282077	1			1	1			ILMN_1680928		1
	ILMN_2285112	1			1	1			ILMN_1680967		1
	ILMN_2285213	1			1	1			ILMN_1681008		1
	ILMN_2290808	1			1	1			ILMN_1681016		1
	ILMN_2294274	1			1	1			ILMN_1681118		1
	ILMN_2296697	1			1	1			ILMN_1681135		1
	ILMN_2298818	1			1	1			ILMN_1681234		1
	ILMN_2298936	1			1	1			ILMN_1681249		1
	ILMN_2299612	1			1	1			ILMN_1681269		1
	ILMN_2300186	1			1	1			ILMN_1681304		1
	ILMN_2306189	1			1	1			ILMN_1681324		1
	ILMN_2310703	1			1	1			ILMN_1681325		1
	ILMN_2311537	1			1	1			ILMN_1681340		1
	ILMN_2311548	1			1	1			ILMN_1681437		1
	ILMN_2311761	1			1	1			ILMN_1681543		1
	ILMN_2311989	1			1	1			ILMN_1681590		1
	ILMN_2312275	1			1	1			ILMN_1681591		1
	ILMN_2312296	1			1	1			ILMN_1681628		1
	ILMN_2312732	1			1	1			ILMN_1681634		1
	ILMN_2313730	1			1	1			ILMN_1681670		1
	ILMN_2313856	1			1	1			ILMN_1681674		1
	ILMN_2313901	1			1	1			ILMN_1681675		1
	ILMN_2314007	1			1	1			ILMN_1681679		1
	ILMN_2316278	1			1	1			ILMN_1681703		1
	ILMN_2317923	1			1	1			ILMN_1681728		1
	ILMN_2318638	1			1	1			ILMN_1681741		1
	ILMN_2318725	1			1	1			ILMN_1681754		1
	ILMN_2319234	1			1	1			ILMN_1681777		1
	ILMN_2319414	1			1	1			ILMN_1681812		1
	ILMN_2319994	1			1	1			ILMN_1681837		1
	ILMN_2319996	1			1	1			ILMN_1681845		1
	ILMN_2320853	1			1	1			ILMN_1681855		1
	ILMN_2321064	1			1	1			ILMN_1681890		1
	ILMN_2321451	1			1	1			ILMN_1681949		1
	ILMN_2323087	1			1	1			ILMN_1681972		1
	ILMN_2323418	1			1	1			ILMN_1681984		1
	ILMN_2323633	1			1	1			ILMN_1681998		1
	ILMN_2324002	1			1	1			ILMN_1682034		1
	ILMN_2324157	1			1	1			ILMN_1682054		1
	ILMN_2324672	1			1	1			ILMN_1682081		1
	ILMN_2327346	1			1	1			ILMN_1682095		1
	ILMN_2328986	1			1	1			ILMN_1682098		1
	ILMN_2329834	1			1	1			ILMN_1682139		1
	ILMN_2329958	1			1	1			ILMN_1682147		1
	ILMN_2331205	1			1	1			ILMN_1682165		1
	ILMN_2331501	1			1	1			ILMN_1682180		1
	ILMN_2332713	1			1	1			ILMN_1682206		1
	ILMN_2333367	1			1	1			ILMN_1682226		1
	ILMN_2333594	1			1	1			ILMN_1682232		1
	ILMN_2334989	1			1	1			ILMN_1682264		1
	ILMN_2336781	1			1	1			ILMN_1682288		1
	ILMN_2336982	1			1	1			ILMN_1682316		1
	ILMN_2337955	1			1	1			ILMN_1682323		1
	ILMN_2338480	1			1	1			ILMN_1682326		1
	ILMN_2338785	1			1	1			ILMN_1682368		1
	ILMN_2338997	1			1	1			ILMN_1682399		1
	ILMN_2340065	1			1	1			ILMN_1682404		1
	ILMN_2340565	1			1	1			ILMN_1682449		1
	ILMN_2340721	1			1	1			ILMN_1682459		1
	ILMN_2340935	1			1	1			ILMN_1682494		1
	ILMN_2341793	1			1	1			ILMN_1682495		1
	ILMN_2342121	1			1	1			ILMN_1682567		1
	ILMN_2342695	1			1	1			ILMN_1682572		1
	ILMN_2343097	1			1	1			ILMN_1682658		1
	ILMN_2343278	1			1	1			ILMN_1682694		1
	ILMN_2344130	1			1	1			ILMN_1682699		1
	ILMN_2345512	1			1	1			ILMN_1682717		1
	ILMN_2345837	1			1	1			ILMN_1682727		1
	ILMN_2346649	1			1	1			ILMN_1682736		1
	ILMN_2347798	1			1	1			ILMN_1682738		1
	ILMN_2348093	1			1	1			ILMN_1682774		1
	ILMN_2348512	1			1	1			ILMN_1682781		1
	ILMN_2349006	1			1	1			ILMN_1682783		1
	ILMN_2353642	1			1	1			ILMN_1682792		1
	ILMN_2354547	1			1	1			ILMN_1682812		1
	ILMN_2354855	1			1	1			ILMN_1682857		1
	ILMN_2355033	1			1	1			ILMN_1682864		1
	ILMN_2356311	1			1	1			ILMN_1682873		1
	ILMN_2356632	1			1	1			ILMN_1682910		1
	ILMN_2357770	1			1	1			ILMN_1682919		1
	ILMN_2358540	1			1	1			ILMN_1682928		1
	ILMN_2358980	1			1	1			ILMN_1682929		1
	ILMN_2359453	1			1	1			ILMN_1682930		1
	ILMN_2359456	1			1	1			ILMN_1682935		1
	ILMN_2359500	1			1	1			ILMN_1682938		1
	ILMN_2359601	1			1	1			ILMN_1682953		1
	ILMN_2360028	1			1	1			ILMN_1682957		1
	ILMN_2361163	1			1	1			ILMN_1682996		1
	ILMN_2362902	1			1	1			ILMN_1683023		1
	ILMN_2363426	1			1	1			ILMN_1683026		1
	ILMN_2363439	1			1	1			ILMN_1683044		1
	ILMN_2363621	1			1	1			ILMN_1683059		1
	ILMN_2364174	1			1	1			ILMN_1683063		1
	ILMN_2364376	1			1	1			ILMN_1683065		1
	ILMN_2364700	1			1	1			ILMN_1683096		1
	ILMN_2364828	1			1	1			ILMN_1683120		1
	ILMN_2365549	1			1	1			ILMN_1683127		1
	ILMN_2366391	1			1	1			ILMN_1683146		1
	ILMN_2367428	1			1	1			ILMN_1683148		1
	ILMN_2369104	1			1	1			ILMN_1683175		1
	ILMN_2369682	1			1	1			ILMN_1683204		1
	ILMN_2370135	1			1	1			ILMN_1683211		1
	ILMN_2370365	1			1	1			ILMN_1683243		1
	ILMN_2371379	1			1	1			ILMN_1683271		1
	ILMN_2373010	1			1	1			ILMN_1683273		1
	ILMN_2373632	1			1	1			ILMN_1683277		1
	ILMN_2374244	1			1	1			ILMN_1683279		1
	ILMN_2374352	1			1	1			ILMN_1683305		1
	ILMN_2375003	1			1	1			ILMN_1683313		1
	ILMN_2375484	1			1	1			ILMN_1683447		1
	ILMN_2376194	1			1	1			ILMN_1683450		1
	ILMN_2378100	1			1	1			ILMN_1683462		1
	ILMN_2378868	1			1	1			ILMN_1683475		1
	ILMN_2378952	1			1	1			ILMN_1683498		1
	ILMN_2379226	1			1	1			ILMN_1683562		1
	ILMN_2380946	1			1	1			ILMN_1683575		1
	ILMN_2380999	1			1	1			ILMN_1683576		1
	ILMN_2381197	1			1	1			ILMN_1683595		1
	ILMN_2381758	1			1	1			ILMN_1683597		1
	ILMN_2382083	1			1	1			ILMN_1683598		1
	ILMN_2382471	1			1	1			ILMN_1683609		1
	ILMN_2383097	1			1	1			ILMN_1683658		1
	ILMN_2383435	1			1	1			ILMN_1683660		1
	ILMN_2383693	1			1	1			ILMN_1683664		1
	ILMN_2383934	1			1	1			ILMN_1683678		1
	ILMN_2385866	1			1	1			ILMN_1683682		1
	ILMN_2386354	1			1	1			ILMN_1683755		1
	ILMN_2386444	1			1	1			ILMN_1683792		1
	ILMN_2387553	1			1	1			ILMN_1683811		1
	ILMN_2387599	1			1	1			ILMN_1683817		1
	ILMN_2387799	1			1	1			ILMN_1683827		1
	ILMN_2389013	1			1	1			ILMN_1683859		1
	ILMN_2389211	1			1	1			ILMN_1683883		1
	ILMN_2389273	1			1	1			ILMN_1683888		1
	ILMN_2389935	1			1	1			ILMN_1683927		1
	ILMN_2390114	1			1	1			ILMN_1683932		1
	ILMN_2390338	1			1	1			ILMN_1683950		1
	ILMN_2390416	1			1	1			ILMN_1683959		1
	ILMN_2391150	1			1	1			ILMN_1683969		1
	ILMN_2394498	1			1	1			ILMN_1683980		1
	ILMN_2394777	1			1	1			ILMN_1684017		1
	ILMN_2395055	1			1	1			ILMN_1684034		1
	ILMN_2395389	1			1	1			ILMN_1684042		1
	ILMN_2395451	1			1	1			ILMN_1684045		1
	ILMN_2397230	1			1	1			ILMN_1684051		1
	ILMN_2397231	1			1	1			ILMN_1684054		1
	ILMN_2397880	1			1	1			ILMN_1684114		1
	ILMN_2398039	1			1	1			ILMN_1684155		1
	ILMN_2399264	1			1	1			ILMN_1684158		1
	ILMN_2399503	1			1	1			ILMN_1684197		1
	ILMN_2401769	1			1	1			ILMN_1684205		1
	ILMN_2402131	1			1	1			ILMN_1684210		1
	ILMN_2402499	1			1	1			ILMN_1684211		1
	ILMN_2402766	1			1	1			ILMN_1684227		1
	ILMN_2402930	1			1	1			ILMN_1684258		1
	ILMN_2402936	1			1	1			ILMN_1684271		1
	ILMN_2403458	1			1	1			ILMN_1684289		1
	ILMN_2403730	1			1	1			ILMN_1684293		1
	ILMN_2404065	1			1	1			ILMN_1684306		1
	ILMN_2405129	1			1	1			ILMN_1684321		1
	ILMN_2405602	1			1	1			ILMN_1684352		1
	ILMN_2406468	1			1	1			ILMN_1684368		1
	ILMN_2407168	1			1	1			ILMN_1684385		1
	ILMN_2407235	1			1	1			ILMN_1684391		1
	ILMN_2407482	1			1	1			ILMN_1684407		1
	ILMN_2408179	1			1	1			ILMN_1684440		1
	ILMN_2409395	1			1	1			ILMN_1684446		1
	ILMN_2410975	1			1	1			ILMN_1684461		1
	ILMN_2412807	1			1	1			ILMN_1684497		1
	ILMN_2415189	1			1	1			ILMN_1684554		1
	ILMN_2415722	1			1	1			ILMN_1684563		1
	ILMN_2415926	1			1	1			ILMN_1684571		1
	ILMN_3176040	1			1	1			ILMN_1684576		1
	ILMN_3177271	1			1	1			ILMN_1684591		1
	ILMN_3177285	1			1	1			ILMN_1684594		1
	ILMN_3178252	1			1	1			ILMN_1684628		1
	ILMN_3178302	1			1	1			ILMN_1684647		1
	ILMN_3178792	1			1	1			ILMN_1684663		1
	ILMN_3178890	1			1	1			ILMN_1684690		1
	ILMN_3187425	1			1	1			ILMN_1684746		1
	ILMN_3187479	1			1	1			ILMN_1684771		1
	ILMN_3188005	1			1	1			ILMN_1684789		1
	ILMN_3188076	1			1	1			ILMN_1684836		1
	ILMN_3188110	1			1	1			ILMN_1684873		1
	ILMN_3190596	1			1	1			ILMN_1684929		1
	ILMN_3191695	1			1	1			ILMN_1684959		1
	ILMN_3192446	1			1	1			ILMN_1684964		1
	ILMN_3192791	1			1	1			ILMN_1685005		1
	ILMN_3193623	1			1	1			ILMN_1685012		1
	ILMN_3194217	1			1	1			ILMN_1685077		1
	ILMN_3195253	1			1	1			ILMN_1685079		1
	ILMN_3195372	1			1	1			ILMN_1685088		1
	ILMN_3195815	1			1	1			ILMN_1685095		1
	ILMN_3197732	1			1	1			ILMN_1685097		1
	ILMN_3198247	1			1	1			ILMN_1685104		1
	ILMN_3198367	1			1	1			ILMN_1685112		1
	ILMN_3198499	1			1	1			ILMN_1685124		1
	ILMN_3199609	1			1	1			ILMN_1685140		1
	ILMN_3199655	1			1	1			ILMN_1685156		1
	ILMN_3199737	1			1	1			ILMN_1685258		1
	ILMN_3199755	1			1	1			ILMN_1685260		1
	ILMN_3199798	1			1	1			ILMN_1685289		1
	ILMN_3199916	1			1	1			ILMN_1685339		1
	ILMN_3199929	1			1	1			ILMN_1685365		1
	ILMN_3200070	1			1	1			ILMN_1685369		1
	ILMN_3200299	1			1	1			ILMN_1685371		1
	ILMN_3200322	1			1	1			ILMN_1685378		1
	ILMN_3200330	1			1	1			ILMN_1685397		1
	ILMN_3200597	1			1	1			ILMN_1685413		1
	ILMN_3200661	1			1	1			ILMN_1685415		1
	ILMN_3200717	1			1	1			ILMN_1685441		1
	ILMN_3201216	1			1	1			ILMN_1685480		1
	ILMN_3201221	1			1	1			ILMN_1685538		1
	ILMN_3201365	1			1	1			ILMN_1685540		1
	ILMN_3201445	1			1	1			ILMN_1685547		1
	ILMN_3201480	1			1	1			ILMN_1685551		1
	ILMN_3201843	1			1	1			ILMN_1685567		1
	ILMN_3201975	1			1	1			ILMN_1685574		1
	ILMN_3201986	1			1	1			ILMN_1685580		1
	ILMN_3202093	1			1	1			ILMN_1685602		1
	ILMN_3202432	1			1	1			ILMN_1685608		1
	ILMN_3202483	1			1	1			ILMN_1685625		1
	ILMN_3202673	1			1	1			ILMN_1685630		1
	ILMN_3203515	1			1	1			ILMN_1685631		1
	ILMN_3203868	1			1	1			ILMN_1685641		1
	ILMN_3204210	1			1	1			ILMN_1685661		1
	ILMN_3205162	1			1	1			ILMN_1685678		1
	ILMN_3205271	1			1	1			ILMN_1685679		1
	ILMN_3205656	1			1	1			ILMN_1685703		1
	ILMN_3206064	1			1	1			ILMN_1685722		1
	ILMN_3206111	1			1	1			ILMN_1685750		1
	ILMN_3206343	1			1	1			ILMN_1685763		1
	ILMN_3206827	1			1	1			ILMN_1685774		1
	ILMN_3208014	1			1	1			ILMN_1685781		1
	ILMN_3208056	1			1	1			ILMN_1685796		1
	ILMN_3208229	1			1	1			ILMN_1685813		1
	ILMN_3208233	1			1	1			ILMN_1685824		1
	ILMN_3208715	1			1	1			ILMN_1685834		1
	ILMN_3208973	1			1	1			ILMN_1685854		1
	ILMN_3209193	1			1	1			ILMN_1685856		1
	ILMN_3209631	1			1	1			ILMN_1685870		1
	ILMN_3209676	1			1	1			ILMN_1685886		1
	ILMN_3210171	1			1	1			ILMN_1685928		1
	ILMN_3210538	1			1	1			ILMN_1685930		1
	ILMN_3210741	1			1	1			ILMN_1685978		1
	ILMN_3210917	1			1	1			ILMN_1685985		1
	ILMN_3211079	1			1	1			ILMN_1686082		1
	ILMN_3211302	1			1	1			ILMN_1686135		1
	ILMN_3211746	1			1	1			ILMN_1686152		1
	ILMN_3212833	1			1	1			ILMN_1686194		1
	ILMN_3213573	1			1	1			ILMN_1686235		1
	ILMN_3213792	1			1	1			ILMN_1686254		1
	ILMN_3214256	1			1	1			ILMN_1686319		1
	ILMN_3215381	1			1	1			ILMN_1686367		1
	ILMN_3215715	1			1	1			ILMN_1686388		1
	ILMN_3215954	1			1	1			ILMN_1686392		1
	ILMN_3216125	1			1	1			ILMN_1686401		1
	ILMN_3216336	1			1	1			ILMN_1686516		1
	ILMN_3216979	1			1	1			ILMN_1686553		1
	ILMN_3217172	1			1	1			ILMN_1686555		1
	ILMN_3217285	1			1	1			ILMN_1686562		1
	ILMN_3217815	1			1	1			ILMN_1686610		1
	ILMN_3218248	1			1	1			ILMN_1686626		1
	ILMN_3218721	1			1	1			ILMN_1686645		1
	ILMN_3219631	1			1	1			ILMN_1686664		1
	ILMN_3219764	1			1	1			ILMN_1686679		1
	ILMN_3220769	1			1	1			ILMN_1686748		1
	ILMN_3220792	1			1	1			ILMN_1686750		1
	ILMN_3223181	1			1	1			ILMN_1686804		1
	ILMN_3223246	1			1	1			ILMN_1686805		1
	ILMN_3223317	1			1	1			ILMN_1686811		1
	ILMN_3224204	1			1	1			ILMN_1686871		1
	ILMN_3224907	1			1	1			ILMN_1686906		1
	ILMN_3224934	1			1	1			ILMN_1686920		1
	ILMN_3224952	1			1	1			ILMN_1686929		1
	ILMN_3225309	1			1	1			ILMN_1686954		1
	ILMN_3225449	1			1	1			ILMN_1686961		1
	ILMN_3225505	1			1	1			ILMN_1686968		1
	ILMN_3225634	1			1	1			ILMN_1686985		1
	ILMN_3225784	1			1	1			ILMN_1687080		1
	ILMN_3225941	1			1	1			ILMN_1687092		1
	ILMN_3226012	1			1	1			ILMN_1687107		1
	ILMN_3226244	1			1	1			ILMN_1687213		1
	ILMN_3226613	1			1	1			ILMN_1687247		1
	ILMN_3226814	1			1	1			ILMN_1687279		1
	ILMN_3227263	1			1	1			ILMN_1687301		1
	ILMN_3227321	1			1	1			ILMN_1687303		1
	ILMN_3227563	1			1	1			ILMN_1687315		1
	ILMN_3227732	1			1	1			ILMN_1687316		1
	ILMN_3227912	1			1	1			ILMN_1687335		1
	ILMN_3227994	1			1	1			ILMN_1687351		1
	ILMN_3228108	1			1	1			ILMN_1687359		1
	ILMN_3228639	1			1	1			ILMN_1687375		1
	ILMN_3229552	1			1	1			ILMN_1687384		1
	ILMN_3229570	1			1	1			ILMN_1687403		1
	ILMN_3229652	1			1	1			ILMN_1687410		1
	ILMN_3229733	1			1	1			ILMN_1687430		1
	ILMN_3231881	1			1	1			ILMN_1687440		1
	ILMN_3232282	1			1	1			ILMN_1687484		1
	ILMN_3232828	1			1	1			ILMN_1687495		1
	ILMN_3233179	1			1	1			ILMN_1687508		1
	ILMN_3233871	1			1	1			ILMN_1687524		1
	ILMN_3234116	1			1	1			ILMN_1687526		1
	ILMN_3234547	1			1	1			ILMN_1687533		1
	ILMN_3234762	1			1	1			ILMN_1687538		1
	ILMN_3234841	1			1	1			ILMN_1687583		1
	ILMN_3234993	1			1	1			ILMN_1687592		1
	ILMN_3235013	1			1	1			ILMN_1687626		1
	ILMN_3235118	1			1	1			ILMN_1687652		1
	ILMN_3235148	1			1	1			ILMN_1687711		1
	ILMN_3235357	1			1	1			ILMN_1687738		1
	ILMN_3235410	1			1	1			ILMN_1687743		1
	ILMN_3235584	1			1	1			ILMN_1687751		1
	ILMN_3235632	1			1	1			ILMN_1687757		1
	ILMN_3236130	1			1	1			ILMN_1687768		1
	ILMN_3236211	1			1	1			ILMN_1687782		1
	ILMN_3236259	1			1	1			ILMN_1687785		1
	ILMN_3236599	1			1	1			ILMN_1687805		1
	ILMN_3236637	1			1	1			ILMN_1687821		1
	ILMN_3236653	1			1	1			ILMN_1687824		1
	ILMN_3236675	1			1	1			ILMN_1687840		1
	ILMN_3237448	1			1	1			ILMN_1687857		1
	ILMN_3237507	1			1	1			ILMN_1687858		1
	ILMN_3237534	1			1	1			ILMN_1687864		1
	ILMN_3238036	1			1	1			ILMN_1687884		1
	ILMN_3238640	1			1	1			ILMN_1687887		1
	ILMN_3238680	1			1	1			ILMN_1687896		1
	ILMN_3238782	1			1	1			ILMN_1687921		1
	ILMN_3238818	1			1	1			ILMN_1687922		1
	ILMN_3239004	1			1	1			ILMN_1687941		1
	ILMN_3239055	1			1	1			ILMN_1687958		1
	ILMN_3239177	1			1	1			ILMN_1687967		1
	ILMN_3239198	1			1	1			ILMN_1687978		1
	ILMN_3239531	1			1	1			ILMN_1687998		1
	ILMN_3239574	1			1	1			ILMN_1688000		1
	ILMN_3239610	1			1	1			ILMN_1688011		1
	ILMN_3239629	1			1	1			ILMN_1688034		1
	ILMN_3239785	1			1	1			ILMN_1688070		1
	ILMN_3239803	1			1	1			ILMN_1688089		1
	ILMN_3240187	1			1	1			ILMN_1688103		1
	ILMN_3240220	1			1	1			ILMN_1688127		1
	ILMN_3240754	1			1	1			ILMN_1688152		1
	ILMN_3241051	1			1	1			ILMN_1688158		1
	ILMN_3241136	1			1	1			ILMN_1688178		1
	ILMN_3241524	1			1	1			ILMN_1688184		1
	ILMN_3241729	1			1	1			ILMN_1688295		1
[truncated: 28,942 more rows]
