# Supplementary material for: Gene Expression Profile of Adult Human Olfactory Bulb and Embryonic Neural Stem Cell Suggests Distinct Signaling Pathways and Epigenetic Control
Source: PLoS One. 2012 Apr 2;7(4):e33542. doi: 10.1371/journal.pone.0033542 (PMC3317670; doi:10.1371/journal.pone.0033542)
Supplement: Table S5 — 1250 modulated genes between human OBNSCs, and hENSC, 203 were up-regulated in OBNSC, and 1049 were up-regulated in hENSC. (XLSX) [file pone.0033542.s013.xlsx]

## Sheet: differentially expressed OBNSC 
	Parametric p-value	FDR	Permutation p-value	Geom mean of intensities in class 1	Geom mean of intensities in class 2	Fold-change	UniqueID	Symbol
1	< 1e-07	< 1e-07	0.178571	88.63	2545.73	0.035	ILMN_1756355	NDUFS3
2	< 1e-07	< 1e-07	0.178571	85.73	5107.7	0.017	ILMN_1661945	C14orf156
3	< 1e-07	< 1e-07	0.178571	103.05	1441.66	0.071	ILMN_1689774	MRFAP1L1
4	< 1e-07	< 1e-07	0.178571	82.82	3206.41	0.026	ILMN_1796165	GLRX5
5	< 1e-07	< 1e-07	0.178571	91.94	1241.17	0.074	ILMN_1701269	ATP5C1
6	< 1e-07	< 1e-07	0.178571	99.65	3099.82	0.032	ILMN_1793829	TMCO1
7	< 1e-07	< 1e-07	0.178571	95.62	2537.99	0.038	ILMN_2064898	CCDC56
8	< 1e-07	< 1e-07	0.178571	91.78	1709.81	0.054	ILMN_1672366	PIGY
9	< 1e-07	< 1e-07	0.178571	88.02	1073.81	0.082	ILMN_2119224	KIFAP3
10	< 1e-07	< 1e-07	0.178571	1360.14	131.36	10.35	ILMN_1782095	C20orf55
11	< 1e-07	< 1e-07	0.178571	87.73	8103.08	0.011	ILMN_1759097	MLLT11
12	< 1e-07	< 1e-07	0.178571	105.58	3576.57	0.03	ILMN_1674069	TOMM7
13	< 1e-07	< 1e-07	0.178571	89.21	2984.02	0.03	ILMN_1795937	VIL2
14	< 1e-07	< 1e-07	0.178571	90.31	2773.81	0.033	ILMN_2175131	TMEM14C
15	< 1e-07	< 1e-07	0.178571	87.55	1857.01	0.047	ILMN_1772261	GLG1
16	< 1e-07	< 1e-07	0.178571	99.01	7727.68	0.013	ILMN_1788742	LOC441246
17	< 1e-07	< 1e-07	0.178571	93.7	2701.45	0.035	ILMN_2142554	NENF
18	< 1e-07	< 1e-07	0.178571	93.49	23300.1	0.004	ILMN_2046730	S100A10
19	< 1e-07	< 1e-07	0.178571	88.77	4503.75	0.02	ILMN_1683562	SNRPG
20	< 1e-07	< 1e-07	0.178571	4411.67	177.71	24.83	ILMN_1719606	LOC644762
21	< 1e-07	< 1e-07	0.178571	85.7	3582.02	0.024	ILMN_1806754	GLDC
22	< 1e-07	< 1e-07	0.178571	98.84	23300.9	0.0042	ILMN_1736500	GNB2L1
23	< 1e-07	< 1e-07	0.178571	97.23	9813.47	0.0099	ILMN_1765043	RPL38
24	< 1e-07	< 1e-07	0.178571	86.17	3333.04	0.026	ILMN_1672128	ATF4
25	< 1e-07	< 1e-07	0.178571	87.48	556.55	0.16	ILMN_1660292	MRPS21
26	< 1e-07	< 1e-07	0.178571	85.56	8105.09	0.011	ILMN_1689329	SCD
27	< 1e-07	< 1e-07	0.178571	5915.18	124.04	47.69	ILMN_1886493
28	< 1e-07	< 1e-07	0.178571	91.43	2494.92	0.037	ILMN_1726204	SCRG1
29	< 1e-07	< 1e-07	0.178571	90.79	1112.84	0.082	ILMN_1747598	PPP1R11
30	< 1e-07	< 1e-07	0.178571	102.84	823.68	0.12	ILMN_1887357
31	< 1e-07	< 1e-07	0.178571	91.07	18707.2	0.0049	ILMN_2152131	ACTB
32	< 1e-07	< 1e-07	0.178571	90.74	5037.53	0.018	ILMN_2365711	2011-09-02
33	< 1e-07	< 1e-07	0.178571	85.52	2120.5	0.04	ILMN_1679796	TOMM20
34	< 1e-07	< 1e-07	0.178571	96.52	3328.87	0.029	ILMN_2151579	HMGN1
35	< 1e-07	< 1e-07	0.178571	89.08	985.64	0.09	ILMN_2056479	TXNL2
36	< 1e-07	< 1e-07	0.178571	87.23	3981.61	0.022	ILMN_1791332	ATP5O
37	< 1e-07	< 1e-07	0.178571	100.94	7758.88	0.013	ILMN_3234831	LOC645296
38	< 1e-07	< 1e-07	0.178571	98.94	4212	0.023	ILMN_1821517
39	< 1e-07	< 1e-07	0.178571	103.61	1920.38	0.054	ILMN_2041293	SQLE
40	< 1e-07	< 1e-07	0.178571	1560.85	119.16	13.1	ILMN_1787326	SNORA65
41	< 1e-07	< 1e-07	0.178571	90.49	4307.68	0.021	ILMN_2333319	PTBP1
42	< 1e-07	< 1e-07	0.178571	95.01	1119.84	0.085	ILMN_1725510	DHCR24
43	< 1e-07	< 1e-07	0.178571	94.28	1695.83	0.056	ILMN_1680967	CIP29
44	< 1e-07	< 1e-07	0.178571	87.36	1712.03	0.051	ILMN_1776102	PSMD10
45	< 1e-07	< 1e-07	0.178571	1129.51	115.62	9.77	ILMN_1698745	CLRN1
46	< 1e-07	< 1e-07	0.178571	94.37	1550.17	0.061	ILMN_1771627	ZMIZ1
47	< 1e-07	< 1e-07	0.178571	87.98	1635.33	0.054	ILMN_2223010	VBP1
48	< 1e-07	< 1e-07	0.178571	93.02	1500.14	0.062	ILMN_2145518	TMEM126B
49	< 1e-07	< 1e-07	0.178571	87.94	5426.85	0.016	ILMN_2235707	ITIH5
50	< 1e-07	< 1e-07	0.178571	85.72	689.01	0.12	ILMN_2329679	TPST2
51	< 1e-07	< 1e-07	0.178571	91.01	1435.96	0.063	ILMN_1776777	ADAR
52	< 1e-07	< 1e-07	0.178571	6882.19	106	64.93	ILMN_1770854	LOC391124
53	< 1e-07	< 1e-07	0.178571	86.8	3545.17	0.024	ILMN_2058141	HMGN2
54	< 1e-07	< 1e-07	0.178571	101.06	3945.49	0.026	ILMN_1757552	PTRF
55	< 1e-07	< 1e-07	0.178571	93.53	1837.49	0.051	ILMN_1662795	CA2
56	< 1e-07	< 1e-07	0.178571	20083.7	119.59	167.93	ILMN_3267451	GAPDHL6
57	< 1e-07	< 1e-07	0.178571	88.32	7352.46	0.012	ILMN_1730611	RTN4
58	< 1e-07	< 1e-07	0.178571	84.51	397.66	0.21	ILMN_2316236	HOPX
59	< 1e-07	< 1e-07	0.178571	86.67	1354.32	0.064	ILMN_1765858	CAB39
60	< 1e-07	< 1e-07	0.178571	94.52	2935.46	0.032	ILMN_3249230	LOC100133649
61	< 1e-07	< 1e-07	0.178571	94.95	3761.19	0.025	ILMN_3287093	LOC646819
62	< 1e-07	< 1e-07	0.178571	95.02	7342.1	0.013	ILMN_1701832	RPL19
63	< 1e-07	< 1e-07	0.178571	87	3349.14	0.026	ILMN_1720048	CCL2
64	< 1e-07	< 1e-07	0.178571	92.08	2006.42	0.046	ILMN_1666399	RING1
65	< 1e-07	< 1e-07	0.178571	83.88	4716.55	0.018	ILMN_2067656	CCND2
66	< 1e-07	< 1e-07	0.178571	3734.69	115.01	32.47	ILMN_1778152	FIGNL1
67	< 1e-07	< 1e-07	0.178571	93.02	8033.16	0.012	ILMN_2225887	ATP5EP2
68	< 1e-07	< 1e-07	0.178571	86.76	2397.32	0.036	ILMN_1729816	VDAC3
69	< 1e-07	< 1e-07	0.178571	98.17	1769.34	0.055	ILMN_1699525	SRI
70	< 1e-07	< 1e-07	0.178571	86.89	1679.19	0.052	ILMN_1736814	CLNS1A
71	< 1e-07	< 1e-07	0.178571	1212.85	101.03	12	ILMN_1664025	PXMP4
72	< 1e-07	< 1e-07	0.178571	90.83	691.32	0.13	ILMN_1676002	QRICH1
73	< 1e-07	< 1e-07	0.178571	98.11	778.12	0.13	ILMN_1699856	RALGDS
74	< 1e-07	< 1e-07	0.178571	91.21	921.37	0.099	ILMN_2312709	LCMT1
75	< 1e-07	< 1e-07	0.178571	86.11	648.46	0.13	ILMN_1729455	EML1
76	< 1e-07	< 1e-07	0.178571	88.43	1178.36	0.075	ILMN_1740742	UROD
77	< 1e-07	< 1e-07	0.178571	87.97	1225.49	0.072	ILMN_1694177	PCNA
78	< 1e-07	< 1e-07	0.178571	90.49	1456.19	0.062	ILMN_2279961	LAMP2
79	< 1e-07	< 1e-07	0.178571	100.13	1399.34	0.072	ILMN_2355168	MGST1
80	< 1e-07	< 1e-07	0.178571	94.72	786.85	0.12	ILMN_1756928	RTN1
81	< 1e-07	< 1e-07	0.178571	90.54	2867.55	0.032	ILMN_1775937	DDB1
82	< 1e-07	< 1e-07	0.178571	90.13	683.38	0.13	ILMN_1810514	SLC25A44
83	< 1e-07	< 1e-07	0.178571	88.59	3432.32	0.026	ILMN_2354515	NDUFAF3
84	< 1e-07	< 1e-07	0.178571	14970	116.23	128.8	ILMN_3240354	CYCSP52
85	< 1e-07	< 1e-07	0.178571	94.61	3149.36	0.03	ILMN_1734190	TCEAL3
86	< 1e-07	< 1e-07	0.178571	1759.39	117.08	15.03	ILMN_1749892	EGLN1
87	< 1e-07	< 1e-07	0.178571	89.68	657.36	0.14	ILMN_1746686	POLR1C
88	< 1e-07	< 1e-07	0.178571	88.73	7547.07	0.012	ILMN_1723874	MRPS6
89	< 1e-07	< 1e-07	0.178571	110.72	6916.74	0.016	ILMN_1798189	COX7C
90	< 1e-07	< 1e-07	0.178571	90.55	2622.82	0.035	ILMN_2070300	LSM2
91	< 1e-07	< 1e-07	0.178571	91.72	10864.7	0.0084	ILMN_1803429	CD44
92	< 1e-07	< 1e-07	0.178571	9226.3	461.37	20	ILMN_1679428	CHIC2
93	< 1e-07	< 1e-07	0.178571	91.27	1643.29	0.056	ILMN_2274775	SLC44A4
94	< 1e-07	< 1e-07	0.178571	84.73	732.91	0.12	ILMN_2320888	CXCR4
95	< 1e-07	< 1e-07	0.178571	88.75	2575.73	0.034	ILMN_2367239	RCAN1
96	< 1e-07	< 1e-07	0.178571	94.28	2659.9	0.035	ILMN_3225761	MGC87895
97	< 1e-07	< 1e-07	0.178571	93.12	574.32	0.16	ILMN_1702806	PDCL3
98	< 1e-07	< 1e-07	0.178571	85.87	597.75	0.14	ILMN_1686750	MGEA5
99	< 1e-07	< 1e-07	0.178571	85.71	5267.84	0.016	ILMN_1780141	TMEM66
100	< 1e-07	< 1e-07	0.178571	96.49	501.5	0.19	ILMN_1773073	PHYH
101	< 1e-07	< 1e-07	0.178571	88.17	6380.45	0.014	ILMN_2355559	PSAP
102	< 1e-07	< 1e-07	0.178571	92.63	1308.29	0.071	ILMN_2369580	C16orf35
103	< 1e-07	< 1e-07	0.178571	87.55	1789.48	0.049	ILMN_1771815	C20orf43
104	< 1e-07	< 1e-07	0.178571	92.45	1619.93	0.057	ILMN_2213558	TMED10P
105	< 1e-07	< 1e-07	0.178571	6102.94	379.66	16.07	ILMN_2045729	WDR12
106	< 1e-07	< 1e-07	0.178571	85.9	6295.49	0.014	ILMN_1803180	PRDX6
107	< 1e-07	< 1e-07	0.178571	106.76	1036.17	0.1	ILMN_2230672	MRPL18
108	< 1e-07	< 1e-07	0.178571	3249.99	181.49	17.91	ILMN_1808860	STX5
109	< 1e-07	< 1e-07	0.178571	83.71	1183.13	0.071	ILMN_2162328	PTS
110	< 1e-07	< 1e-07	0.178571	83.16	3673.54	0.023	ILMN_1745172	ILF2
111	< 1e-07	< 1e-07	0.178571	92.21	1221.62	0.075	ILMN_1672662	SLC20A1
112	< 1e-07	< 1e-07	0.178571	2922.06	183.73	15.9	ILMN_3201221	LOC341315
113	< 1e-07	< 1e-07	0.178571	92.19	1026.32	0.09	ILMN_1736888	SAR1B
114	< 1e-07	< 1e-07	0.178571	90.86	587.34	0.15	ILMN_2373566	PJA1
115	< 1e-07	< 1e-07	0.178571	89.94	387.44	0.23	ILMN_1769245	GLIPR1
116	< 1e-07	< 1e-07	0.178571	86.79	1788.86	0.049	ILMN_1771593	RRM1
117	< 1e-07	< 1e-07	0.178571	3808	336.89	11.3	ILMN_1694502	PRIM1
118	< 1e-07	< 1e-07	0.178571	86.31	1273.82	0.068	ILMN_1761131	PECI
119	< 1e-07	< 1e-07	0.178571	90.41	304.81	0.3	ILMN_1718271	MTIF3
120	< 1e-07	< 1e-07	0.178571	89.2	596.17	0.15	ILMN_1721626	ARID5B
121	< 1e-07	< 1e-07	0.178571	5395.17	319.26	16.9	ILMN_2124352	DCUN1D5
122	< 1e-07	< 1e-07	0.178571	94.03	1130.4	0.083	ILMN_1673252	AIMP2
123	< 1e-07	< 1e-07	0.178571	98.5	2726.93	0.036	ILMN_2148459	B2M
124	< 1e-07	< 1e-07	0.178571	96.81	1240.08	0.078	ILMN_3227315	LOC729009
125	< 1e-07	< 1e-07	0.178571	88.82	1216.9	0.073	ILMN_2365544	NHP2
126	< 1e-07	< 1e-07	0.178571	93.06	885.36	0.11	ILMN_1692163	NSDHL
127	< 1e-07	< 1e-07	0.178571	91.61	4986.39	0.018	ILMN_1726603	ATP5I
128	< 1e-07	< 1e-07	0.178571	96.95	2114.69	0.046	ILMN_3260070	LOC100128266
129	< 1e-07	< 1e-07	0.178571	87.45	3984.64	0.022	ILMN_1691506	NGRN
130	< 1e-07	< 1e-07	0.178571	79.82	1474.33	0.054	ILMN_1736597	TKT
131	< 1e-07	< 1e-07	0.178571	85.8	821.4	0.1	ILMN_1771333	CD47
132	< 1e-07	< 1e-07	0.178571	87.18	997.01	0.087	ILMN_2041046	CKS1B
133	< 1e-07	< 1e-07	0.178571	93.9	511.69	0.18	ILMN_1664216	NKIRAS1
134	< 1e-07	< 1e-07	0.178571	93.68	1242.16	0.075	ILMN_1705570	H2AFY2
135	< 1e-07	< 1e-07	0.178571	94.37	6522.77	0.014	ILMN_1801616	EMP1
136	< 1e-07	< 1e-07	0.178571	88.28	1159.52	0.076	ILMN_1815115	CYC1
137	< 1e-07	< 1e-07	0.178571	85.37	5070.04	0.017	ILMN_2337241	RPS15A
138	< 1e-07	< 1e-07	0.178571	87.99	1481.19	0.059	ILMN_1733931	PDCD6
139	< 1e-07	< 1e-07	0.178571	91.06	436.21	0.21	ILMN_1739521	NLGN1
140	< 1e-07	< 1e-07	0.178571	85.6	3104.09	0.028	ILMN_2087060	TOMM7
141	< 1e-07	< 1e-07	0.178571	97.34	1123.02	0.087	ILMN_1756439	SCRN1
142	< 1e-07	< 1e-07	0.178571	90.67	2043.71	0.044	ILMN_1709611	PSMA1
143	< 1e-07	< 1e-07	0.178571	92.16	3938.92	0.023	ILMN_2398159	DKK3
144	< 1e-07	< 1e-07	0.178571	89.53	490.63	0.18	ILMN_1658995	ACOT9
145	< 1e-07	< 1e-07	0.178571	3100.27	156.7	19.78	ILMN_1811472	KIF23
146	< 1e-07	< 1e-07	0.178571	85.81	693.04	0.12	ILMN_2164081	KLHL12
147	< 1e-07	< 1e-07	0.178571	1382.12	137.85	10.03	ILMN_1712914	SEMA6B
148	< 1e-07	< 1e-07	0.178571	89.11	1226.56	0.073	ILMN_1691181	TMX1
149	< 1e-07	< 1e-07	0.178571	83.39	1244.71	0.067	ILMN_1814971	TCF25
150	< 1e-07	< 1e-07	0.178571	98.39	1904.01	0.052	ILMN_1812478	ZNHIT3
151	< 1e-07	< 1e-07	0.178571	90.67	5718.47	0.016	ILMN_1666471	UQCRQ
152	< 1e-07	< 1e-07	0.178571	83.23	490.65	0.17	ILMN_1756572	COQ2
153	< 1e-07	< 1e-07	0.178571	92.25	911.32	0.1	ILMN_1687430	EIF2B4
154	< 1e-07	< 1e-07	0.178571	103.39	2458.75	0.042	ILMN_1667081	CCND2
155	< 1e-07	< 1e-07	0.178571	1619.65	158.39	10.23	ILMN_1696699	FAM184A
156	< 1e-07	< 1e-07	0.178571	88.59	1892.44	0.047	ILMN_1770084	TACC1
157	< 1e-07	< 1e-07	0.178571	90.71	966.94	0.094	ILMN_1655340	RNF181
158	< 1e-07	< 1e-07	0.178571	93.14	754.88	0.12	ILMN_2180352	DIP2B
159	< 1e-07	< 1e-07	0.178571	91.84	773.25	0.12	ILMN_3290380	LOC387703
160	< 1e-07	< 1e-07	0.178571	86.01	283.29	0.3	ILMN_2289093	KIAA1618
161	< 1e-07	< 1e-07	0.178571	93.72	1024.64	0.091	ILMN_1766981	UNC50
162	< 1e-07	< 1e-07	0.178571	2275.49	111.16	20.47	ILMN_3308310	RNU86
163	< 1e-07	< 1e-07	0.178571	89.9	1767.77	0.051	ILMN_1769810	ARL6IP5
164	< 1e-07	< 1e-07	0.178571	90.71	1686.89	0.054	ILMN_1750409	RAB9A
165	< 1e-07	< 1e-07	0.178571	86.44	1634.47	0.053	ILMN_1804327	NAP1L4
166	< 1e-07	< 1e-07	0.178571	1822.14	91.76	19.86	ILMN_2081210	RAB12
167	< 1e-07	< 1e-07	0.178571	93.13	514.22	0.18	ILMN_1793743	DIRC2
168	< 1e-07	< 1e-07	0.178571	90.3	895.89	0.1	ILMN_1801118	C16orf33
169	< 1e-07	< 1e-07	0.178571	4264.9	364.84	11.69	ILMN_1691575	SNX2
170	< 1e-07	< 1e-07	0.178571	92.36	17061.4	0.0054	ILMN_1746516	RPS25
171	< 1e-07	< 1e-07	0.178571	90.11	1886.2	0.048	ILMN_2371964	MRPS12
172	< 1e-07	< 1e-07	0.178571	89.56	590.08	0.15	ILMN_1748476	NOP58
173	< 1e-07	< 1e-07	0.178571	90.1	1974.27	0.046	ILMN_2230902	CTNNA1
174	< 1e-07	< 1e-07	0.178571	100.42	8892.22	0.011	ILMN_2411723	RPSA
175	< 1e-07	< 1e-07	0.178571	97.87	904	0.11	ILMN_3293146	LOC642975
176	< 1e-07	< 1e-07	0.178571	88.54	1479.64	0.06	ILMN_2335718	HNRNPAB
177	< 1e-07	< 1e-07	0.178571	95.08	3169.93	0.03	ILMN_3256004	LOC100130003
178	< 1e-07	< 1e-07	0.178571	91.19	769.47	0.12	ILMN_2069945	SNRNP27
179	< 1e-07	< 1e-07	0.178571	97.76	775.28	0.13	ILMN_1770733	RIC8A
180	< 1e-07	< 1e-07	0.178571	92.29	3002.3	0.031	ILMN_2167922	TRMT5
181	< 1e-07	< 1e-07	0.178571	89.2	3544.57	0.025	ILMN_1755536	PFDN5
182	< 1e-07	< 1e-07	0.178571	93.51	2377.43	0.039	ILMN_1806778	UBE2E1
183	< 1e-07	< 1e-07	0.178571	93.12	538.98	0.17	ILMN_3214052	LOC644877
184	< 1e-07	< 1e-07	0.178571	91.9	1934.26	0.048	ILMN_1711878	ENOPH1
185	< 1e-07	< 1e-07	0.178571	97.88	1057.25	0.093	ILMN_2098325	C8orf33
186	< 1e-07	< 1e-07	0.178571	95.75	13533.2	0.0071	ILMN_2234697	BEX1
187	< 1e-07	< 1e-07	0.178571	94	4286.73	0.022	ILMN_2308582	CYB5R3
188	< 1e-07	< 1e-07	0.178571	81.38	4493.7	0.018	ILMN_1808939	RPS6
189	< 1e-07	< 1e-07	0.178571	94.72	1430.78	0.066	ILMN_2172269	TMEM183B
190	< 1e-07	< 1e-07	0.178571	92.41	686.64	0.13	ILMN_1774547	MPRIP
191	< 1e-07	< 1e-07	0.178571	88.75	247.95	0.36	ILMN_1788538	NCALD
192	< 1e-07	< 1e-07	0.178571	1435.55	124.39	11.54	ILMN_2201668	SLC19A2
193	< 1e-07	< 1e-07	0.178571	99.39	739.87	0.13	ILMN_2126038	STMN2
194	< 1e-07	< 1e-07	0.178571	1715.24	244.05	7.03	ILMN_2052891	PKD2
195	< 1e-07	< 1e-07	0.178571	91.62	494.51	0.19	ILMN_2392635	ABCF1
196	< 1e-07	< 1e-07	0.178571	107.11	1968.98	0.054	ILMN_1667030	HSBP1
197	< 1e-07	< 1e-07	0.178571	98.82	3243.45	0.03	ILMN_3248443	SNHG6
198	< 1e-07	< 1e-07	0.178571	90.92	938.98	0.097	ILMN_2360705	ACSL3
199	< 1e-07	< 1e-07	0.178571	91.69	733.58	0.12	ILMN_2227757	PCDHB2
200	< 1e-07	< 1e-07	0.178571	86.19	1449.87	0.059	ILMN_1752589	TMEM183A
201	< 1e-07	< 1e-07	0.178571	94.39	2405.23	0.039	ILMN_1702177	GLO1
202	< 1e-07	< 1e-07	0.178571	87.18	362.94	0.24	ILMN_1720114	GMNN
203	< 1e-07	< 1e-07	0.178571	92.82	3371.38	0.028	ILMN_1780036	WDR1
204	< 1e-07	< 1e-07	0.178571	4609.29	106.05	43.46	ILMN_1881909
205	< 1e-07	< 1e-07	0.178571	92.94	373.6	0.25	ILMN_1778238	UTP6
206	< 1e-07	< 1e-07	0.178571	89.42	450.62	0.2	ILMN_1670561	TCEAL8
207	< 1e-07	< 1e-07	0.178571	88.49	536.6	0.16	ILMN_1708328	RAB11FIP3
208	< 1e-07	< 1e-07	0.178571	94.43	585.85	0.16	ILMN_1779886	TBC1D14
209	< 1e-07	< 1e-07	0.178571	89.15	1835.45	0.049	ILMN_2323048	ERP29
210	< 1e-07	< 1e-07	0.178571	89.71	629.83	0.14	ILMN_1808779	CSTF3
211	< 1e-07	< 1e-07	0.178571	96.31	729.14	0.13	ILMN_3251733	C19orf43
212	< 1e-07	< 1e-07	0.178571	85.93	2942.14	0.029	ILMN_1814726	SCARB2
213	< 1e-07	< 1e-07	0.178571	88.09	497.9	0.18	ILMN_1739876	RAB3GAP1
214	< 1e-07	< 1e-07	0.178571	94.39	14197.8	0.0066	ILMN_1740587	RPS11
215	< 1e-07	< 1e-07	0.178571	90.99	746.52	0.12	ILMN_1813682	MRPL53
216	< 1e-07	< 1e-07	0.178571	90.42	1293.41	0.07	ILMN_1797933	MRPL17
217	< 1e-07	< 1e-07	0.178571	94	1942.58	0.048	ILMN_2175465	RSL24D1
218	< 1e-07	< 1e-07	0.178571	6715.58	706.21	9.51	ILMN_1800837	CFDP1
219	< 1e-07	< 1e-07	0.178571	6299.84	161.7	38.96	ILMN_1653432	HNRPDL
220	< 1e-07	< 1e-07	0.178571	86.96	1051.66	0.083	ILMN_1724504	SETD3
221	< 1e-07	< 1e-07	0.178571	91.13	1032.69	0.088	ILMN_1761242	COMMD1
222	< 1e-07	< 1e-07	0.178571	93.75	4035.38	0.023	ILMN_3240740	EIF3L
223	< 1e-07	< 1e-07	0.178571	92.29	1561.77	0.059	ILMN_1672443	QDPR
224	< 1e-07	< 1e-07	0.178571	99.42	2004.36	0.05	ILMN_1657283	ALKBH5
225	< 1e-07	< 1e-07	0.178571	103.4	2013.93	0.051	ILMN_2307883	ATP5J2
226	< 1e-07	< 1e-07	0.178571	8367.69	836.94	10	ILMN_1734826	NUP88
227	< 1e-07	< 1e-07	0.178571	90.79	787.4	0.12	ILMN_1764549	UBE3A
228	< 1e-07	< 1e-07	0.178571	95.71	498.67	0.19	ILMN_1781454	RAE1
229	< 1e-07	< 1e-07	0.178571	91.8	3920.59	0.023	ILMN_1736353	PSMC1
230	< 1e-07	< 1e-07	0.178571	92.82	600.86	0.15	ILMN_1775744	MRPS16
231	< 1e-07	< 1e-07	0.178571	109.34	728.57	0.15	ILMN_1657483	SEC23B
232	< 1e-07	< 1e-07	0.178571	90.28	777.93	0.12	ILMN_1671191	UQCRC1
233	< 1e-07	< 1e-07	0.178571	90.46	1482.66	0.061	ILMN_1758941	REEP5
234	< 1e-07	< 1e-07	0.178571	97.85	2391.53	0.041	ILMN_1735584	ST8SIA5
235	< 1e-07	< 1e-07	0.178571	112.13	482.63	0.23	ILMN_1713892	C4orf34
236	< 1e-07	< 1e-07	0.178571	95.16	3290.64	0.029	ILMN_2237428	SCD5
237	< 1e-07	< 1e-07	0.178571	88.59	1030.02	0.086	ILMN_1654690	CECR5
238	< 1e-07	< 1e-07	0.178571	98.2	901.9	0.11	ILMN_1721669	IDH3B
239	< 1e-07	< 1e-07	0.178571	93.51	1498.98	0.062	ILMN_1807994	PCNP
240	< 1e-07	< 1e-07	0.178571	1265.95	114.85	11.02	ILMN_1764573	XIST
241	< 1e-07	< 1e-07	0.178571	88.11	499.96	0.18	ILMN_1756898	COQ9
242	< 1e-07	< 1e-07	0.178571	3513.44	195.24	18	ILMN_2354855	OTUB1
243	< 1e-07	< 1e-07	0.178571	98.99	3455.5	0.029	ILMN_3240247	NOP10
244	< 1e-07	< 1e-07	0.178571	92.85	2100.78	0.044	ILMN_1790549	TSPAN3
245	< 1e-07	< 1e-07	0.178571	2520.25	141.68	17.79	ILMN_3252093	LOC100128548
246	< 1e-07	< 1e-07	0.178571	86.96	813.92	0.11	ILMN_1732053	SNRNP70
247	< 1e-07	< 1e-07	0.178571	99.95	487.01	0.21	ILMN_1654609	TIGA1
248	< 1e-07	< 1e-07	0.178571	85.03	771.47	0.11	ILMN_1793118	TAX1BP1
249	< 1e-07	< 1e-07	0.178571	84.1	2361.1	0.036	ILMN_1726981	VEGFB
250	< 1e-07	< 1e-07	0.178571	94.88	795.71	0.12	ILMN_1803312	DIMT1L
251	< 1e-07	< 1e-07	0.178571	92.92	1021.02	0.091	ILMN_2156982	IMP4
252	< 1e-07	< 1e-07	0.178571	90.13	507.51	0.18	ILMN_1733937	MMD
253	< 1e-07	< 1e-07	0.178571	86.29	3482.39	0.025	ILMN_2189933	RPL36AL
254	< 1e-07	< 1e-07	0.178571	88.11	748.53	0.12	ILMN_1727134	KLHDC5
255	< 1e-07	< 1e-07	0.178571	96.98	1148.93	0.084	ILMN_1693394	BCKDK
256	< 1e-07	< 1e-07	0.178571	99.02	2232.65	0.044	ILMN_3249748	LDHA
257	< 1e-07	< 1e-07	0.178571	2906.52	172.29	16.87	ILMN_1714327	SETD1A
258	< 1e-07	< 1e-07	0.178571	94.48	565.04	0.17	ILMN_1751572	TLE1
259	< 1e-07	< 1e-07	0.178571	99.89	1910.09	0.052	ILMN_1726565	PIK3R2
260	< 1e-07	< 1e-07	0.178571	92.4	2555.03	0.036	ILMN_1697176	GFAP
261	< 1e-07	< 1e-07	0.178571	89.36	534.18	0.17	ILMN_1770850	PNMA1
262	< 1e-07	< 1e-07	0.178571	84.83	1172.8	0.072	ILMN_1732705	HCFC1
263	< 1e-07	< 1e-07	0.178571	4936.3	632.5	7.8	ILMN_1771734	LOC728564
264	< 1e-07	< 1e-07	0.178571	85.82	251.61	0.34	ILMN_1676899	YEATS2
265	< 1e-07	< 1e-07	0.178571	90.26	5341.32	0.017	ILMN_1776104	NDUFS5
266	< 1e-07	< 1e-07	0.178571	92.28	795.64	0.12	ILMN_1763207	BATF3
267	< 1e-07	< 1e-07	0.178571	87.14	441.33	0.2	ILMN_1667561	IFRD1
268	< 1e-07	< 1e-07	0.178571	91.12	553	0.16	ILMN_2152429	C12orf76
269	< 1e-07	< 1e-07	0.178571	99.24	266.94	0.37	ILMN_1718285	HOXC8
270	< 1e-07	< 1e-07	0.178571	1108.02	126.81	8.74	ILMN_1791867	EPB41L4A
271	< 1e-07	< 1e-07	0.178571	86.98	773.71	0.11	ILMN_1811551	DERA
272	< 1e-07	< 1e-07	0.178571	91.6	3191.68	0.029	ILMN_1666372	ATP5H
273	< 1e-07	< 1e-07	0.178571	91.39	739.32	0.12	ILMN_1724040	ANKRD57
274	< 1e-07	< 1e-07	0.178571	110.81	642.12	0.17	ILMN_2091123	HCG2P7
275	< 1e-07	< 1e-07	0.178571	115.51	2720.19	0.042	ILMN_1753342	SAT1
276	< 1e-07	< 1e-07	0.178571	93.5	1209.27	0.077	ILMN_1739798	C7orf30
277	< 1e-07	< 1e-07	0.178571	90.43	2178.09	0.042	ILMN_2339779	ATP6V1E1
278	< 1e-07	< 1e-07	0.178571	99.63	789.96	0.13	ILMN_1725183	TBCE
279	< 1e-07	< 1e-07	0.178571	93.13	6382.59	0.015	ILMN_1782439	CNN3
280	< 1e-07	< 1e-07	0.178571	961.86	119.07	8.08	ILMN_1848461
281	< 1e-07	< 1e-07	0.178571	90.15	789.69	0.11	ILMN_1759513	RND3
282	< 1e-07	< 1e-07	0.178571	95.13	466.49	0.2	ILMN_2072140	BTF3L4
283	< 1e-07	< 1e-07	0.178571	2167.86	131.24	16.52	ILMN_1703427	SON
284	< 1e-07	< 1e-07	0.178571	94.04	636.17	0.15	ILMN_1795026	FAM189B
285	< 1e-07	< 1e-07	0.178571	99.63	17864.3	0.0056	ILMN_3274601	LOC343184
286	< 1e-07	< 1e-07	0.178571	92.92	2536.14	0.037	ILMN_2101832	LAPTM4B
287	< 1e-07	< 1e-07	0.178571	100.49	1025.01	0.098	ILMN_1775939	SF3B2
288	< 1e-07	< 1e-07	0.178571	87.46	4770.81	0.018	ILMN_2381397	HSPD1
289	< 1e-07	< 1e-07	0.178571	85.18	398.6	0.21	ILMN_2374159	HERPUD1
290	< 1e-07	< 1e-07	0.178571	94.21	496.51	0.19	ILMN_1676026	MRPS26
291	< 1e-07	< 1e-07	0.178571	4742.02	100.43	47.22	ILMN_3231026	LOC654780
292	< 1e-07	< 1e-07	0.178571	88.96	531.08	0.17	ILMN_1725594	FAM188A
293	< 1e-07	< 1e-07	0.178571	1754.11	143.39	12.23	ILMN_1663489	UBR2
294	< 1e-07	< 1e-07	0.178571	96.56	558.9	0.17	ILMN_1795911	TTC37
295	< 1e-07	< 1e-07	0.178571	101.68	2809.99	0.036	ILMN_1713756	GLUD1
296	< 1e-07	< 1e-07	0.178571	91.58	1327.29	0.069	ILMN_1783333	C16orf61
297	< 1e-07	< 1e-07	0.178571	90.03	3005.15	0.03	ILMN_2226324	BRP44L
298	< 1e-07	< 1e-07	0.178571	88.78	1042.95	0.085	ILMN_1748770	CKAP5
299	< 1e-07	< 1e-07	0.178571	8510.87	107.54	79.14	ILMN_2342695	PDGFA
300	< 1e-07	< 1e-07	0.178571	81.1	1053.72	0.077	ILMN_2180519	LOC729603
301	< 1e-07	< 1e-07	0.178571	84.03	819.92	0.1	ILMN_1692276	GGPS1
302	< 1e-07	< 1e-07	0.178571	92.17	1972.45	0.047	ILMN_1767747	HDAC2
303	< 1e-07	< 1e-07	0.178571	99.68	1516.92	0.066	ILMN_1697218	MED22
304	< 1e-07	< 1e-07	0.178571	105.18	2880.59	0.037	ILMN_1804854	CTNNA1
305	< 1e-07	< 1e-07	0.178571	99.88	3083.72	0.032	ILMN_1698258	DNAJC8
306	< 1e-07	< 1e-07	0.178571	96.4	556.64	0.17	ILMN_1795991	C22orf28
307	< 1e-07	< 1e-07	0.178571	106.96	1311.57	0.082	ILMN_1720442	NCBP2
308	< 1e-07	< 1e-07	0.178571	90.46	738.45	0.12	ILMN_1699496	PHF21A
309	< 1e-07	< 1e-07	0.178571	98.55	2636.18	0.037	ILMN_1697694	ATP6AP1
310	< 1e-07	< 1e-07	0.178571	95.08	1689.18	0.056	ILMN_1797310	ATP6V1D
311	< 1e-07	< 1e-07	0.178571	91.18	3726.8	0.024	ILMN_1661170	NDUFB8
312	< 1e-07	< 1e-07	0.178571	3042.3	118.09	25.76	ILMN_1776879	HMGN2
313	< 1e-07	< 1e-07	0.178571	88.71	3471.19	0.026	ILMN_1806023	JUN
314	< 1e-07	< 1e-07	0.178571	92.72	895.43	0.1	ILMN_2402798	AP2M1
315	< 1e-07	< 1e-07	0.178571	99.23	1363.31	0.073	ILMN_1814859	DDX47
316	< 1e-07	< 1e-07	0.178571	92.94	493.27	0.19	ILMN_1686097	TOP2A
317	< 1e-07	< 1e-07	0.178571	101.53	1794.54	0.057	ILMN_3266606	FABP5L2
318	< 1e-07	< 1e-07	0.178571	95.05	1089.25	0.087	ILMN_2413158	PODXL
319	< 1e-07	< 1e-07	0.178571	98.76	992.13	0.1	ILMN_2087528	CPSF3
320	< 1e-07	< 1e-07	0.178571	100.05	1049.09	0.095	ILMN_1684771	PGRMC1
321	< 1e-07	< 1e-07	0.178571	92	692.99	0.13	ILMN_1744534	LYRM5
322	< 1e-07	< 1e-07	0.178571	84.99	560.2	0.15	ILMN_1659285	PSMG1
323	< 1e-07	< 1e-07	0.178571	86.82	747.91	0.12	ILMN_1678493	CHN1
324	< 1e-07	< 1e-07	0.178571	93.49	671.05	0.14	ILMN_1797735	C1orf21
325	< 1e-07	< 1e-07	0.178571	93.59	686.7	0.14	ILMN_1658472	APH1A
326	< 1e-07	< 1e-07	0.178571	90.51	2381.19	0.038	ILMN_2383975	PRDX5
327	< 1e-07	< 1e-07	0.178571	100.59	2644.36	0.038	ILMN_1710962	TMEM97
328	< 1e-07	< 1e-07	0.178571	3890.16	111.56	34.87	ILMN_2389114	FIGNL1
329	< 1e-07	< 1e-07	0.178571	90.01	3965.19	0.023	ILMN_1769118	2011-09-09
330	< 1e-07	< 1e-07	0.178571	89.44	1018.59	0.088	ILMN_2307455	UBE2A
331	< 1e-07	< 1e-07	0.178571	94.59	1184.16	0.08	ILMN_2301624	MACF1
332	< 1e-07	< 1e-07	0.178571	7476.66	180.27	41.47	ILMN_3178792	HNRNPA2B1
333	< 1e-07	< 1e-07	0.178571	2151.34	171.87	12.52	ILMN_3275033	LOC646841
334	< 1e-07	< 1e-07	0.178571	91.71	979.35	0.094	ILMN_1783753	TXNDC12
335	< 1e-07	< 1e-07	0.178571	90.84	318.38	0.29	ILMN_1753393	OSGEP
336	< 1e-07	< 1e-07	0.178571	93.37	360.97	0.26	ILMN_1760400	C8orf41
337	< 1e-07	< 1e-07	0.178571	94.04	735.65	0.13	ILMN_1806432	NT5C
338	< 1e-07	< 1e-07	0.178571	93.68	1463.36	0.064	ILMN_1779182	TMEM98
339	< 1e-07	< 1e-07	0.178571	2251.43	109.95	20.48	ILMN_1770071	IFITM4P
340	< 1e-07	< 1e-07	0.178571	111.68	5416.13	0.021	ILMN_3244117	STMN3
341	< 1e-07	< 1e-07	0.178571	91.84	730.12	0.13	ILMN_1722905	MRPS11
342	< 1e-07	< 1e-07	0.178571	99.05	958.5	0.1	ILMN_1774330	WSCD1
343	< 1e-07	< 1e-07	0.178571	2256.42	169.13	13.34	ILMN_3229652	LOC728953
344	< 1e-07	< 1e-07	0.178571	81.35	483.85	0.17	ILMN_2188204	ATG12
345	< 1e-07	< 1e-07	0.178571	18995.1	2271.25	8.36	ILMN_1659405	LOC653773
346	< 1e-07	< 1e-07	0.178571	90.65	5541.06	0.016	ILMN_2120273	AP1S2
347	< 1e-07	< 1e-07	0.178571	91.12	1529.77	0.06	ILMN_1687921	JMJD8
348	< 1e-07	< 1e-07	0.178571	114.94	8257.66	0.014	ILMN_1797728	HMGCS1
349	< 1e-07	< 1e-07	0.178571	1686.81	112.03	15.06	ILMN_1810441	TRIM3
350	< 1e-07	< 1e-07	0.178571	1229.88	138.22	8.9	ILMN_3235584	TRIM66
351	< 1e-07	< 1e-07	0.178571	5821.7	706.96	8.23	ILMN_1798254	ACTR10
352	< 1e-07	< 1e-07	0.178571	99.68	2462.82	0.04	ILMN_1760201	DNMT1
353	< 1e-07	< 1e-07	0.178571	101.39	703.42	0.14	ILMN_1688953	ARHGAP19
354	< 1e-07	< 1e-07	0.178571	90.18	1158.83	0.078	ILMN_1752591	LEPROTL1
355	< 1e-07	< 1e-07	0.178571	88.51	1156.66	0.077	ILMN_1714623	TOMM22
356	< 1e-07	< 1e-07	0.178571	98.31	517.2	0.19	ILMN_3243156	AHNAK2
357	< 1e-07	< 1e-07	0.178571	91.47	10237.6	0.0089	ILMN_1771376	PEA15
358	< 1e-07	< 1e-07	0.178571	88.99	1191.08	0.075	ILMN_2049343	LOC642947
359	< 1e-07	< 1e-07	0.178571	91.04	4217.39	0.022	ILMN_1801928	YWHAZ
360	< 1e-07	< 1e-07	0.178571	107.1	1291.35	0.083	ILMN_2196097	PPP2CA
361	< 1e-07	< 1e-07	0.178571	93.17	206.87	0.45	ILMN_1662686	USPL1
362	< 1e-07	< 1e-07	0.178571	90.83	554.77	0.16	ILMN_2375002	MAP4K4
363	< 1e-07	< 1e-07	0.178571	2082.79	118.11	17.64	ILMN_1734428	LSM12
364	< 1e-07	< 1e-07	0.178571	85.47	656.14	0.13	ILMN_1815051	API5
365	< 1e-07	< 1e-07	0.178571	94.55	2934.38	0.032	ILMN_1657204	SAE1
366	< 1e-07	< 1e-07	0.178571	87.42	495.96	0.18	ILMN_1769451	ILVBL
367	< 1e-07	< 1e-07	0.178571	88	512.84	0.17	ILMN_1780987	RFXANK
368	< 1e-07	< 1e-07	0.178571	88.91	545.19	0.16	ILMN_2364357	RPS6KB2
369	< 1e-07	< 1e-07	0.178571	104.16	595.26	0.17	ILMN_1772798	ARPP19
370	< 1e-07	< 1e-07	0.178571	100.28	3478.9	0.029	ILMN_1728132	LDHB
371	< 1e-07	< 1e-07	0.178571	85.2	1096.58	0.078	ILMN_2354391	EGLN2
372	< 1e-07	< 1e-07	0.178571	97.13	1484.65	0.065	ILMN_1669394	EI24
373	< 1e-07	< 1e-07	0.178571	80.26	800.12	0.1	ILMN_1703791	ANXA7
374	< 1e-07	< 1e-07	0.178571	95.6	199.39	0.48	ILMN_1664761	TMEM138
375	< 1e-07	< 1e-07	0.178571	90.97	1898.9	0.048	ILMN_1714335	RDH10
376	< 1e-07	< 1e-07	0.178571	91.29	1129.81	0.081	ILMN_1687501	MOXD1
377	< 1e-07	< 1e-07	0.178571	94.32	839.86	0.11	ILMN_2380771	AKR1A1
378	< 1e-07	< 1e-07	0.178571	89.13	352.63	0.25	ILMN_2374778	DUT
379	< 1e-07	< 1e-07	0.178571	111.26	931	0.12	ILMN_1671374	C19orf53
380	< 1e-07	< 1e-07	0.178571	98.2	721.52	0.14	ILMN_1750181	TESC
381	< 1e-07	< 1e-07	0.178571	94.55	1621.23	0.058	ILMN_2182482	SHCBP1
382	< 1e-07	< 1e-07	0.178571	97.33	1588.97	0.061	ILMN_1797776	PRSS23
383	< 1e-07	< 1e-07	0.178571	87.56	710.53	0.12	ILMN_1673788	CDV3
384	< 1e-07	< 1e-07	0.178571	90.54	477.51	0.19	ILMN_1694759	C19orf42
385	< 1e-07	< 1e-07	0.178571	86.99	1133.73	0.077	ILMN_1685258	TMEM14B
386	< 1e-07	< 1e-07	0.178571	87.68	594.33	0.15	ILMN_2324998	NGDN
387	< 1e-07	< 1e-07	0.178571	95.15	825.32	0.12	ILMN_1666546	DUSP14
388	< 1e-07	< 1e-07	0.178571	96.51	968.38	0.1	ILMN_1849494
389	< 1e-07	< 1e-07	0.178571	92.73	350.85	0.26	ILMN_1734929	BBOX1
390	< 1e-07	< 1e-07	0.178571	3004.32	197.11	15.24	ILMN_3229552	MED7
391	< 1e-07	< 1e-07	0.178571	95.24	2407.36	0.04	ILMN_2368292	TSEN34
392	< 1e-07	< 1e-07	0.178571	90.13	1158.76	0.078	ILMN_2103295	TINP1
393	< 1e-07	< 1e-07	0.178571	96.55	429.77	0.22	ILMN_1698463	ILF3
394	< 1e-07	< 1e-07	0.178571	97.47	766.07	0.13	ILMN_1671583	MKRN1
395	< 1e-07	< 1e-07	0.178571	113.81	1060.53	0.11	ILMN_1691425	LDOC1L
396	< 1e-07	< 1e-07	0.178571	113.54	2968.13	0.038	ILMN_2055165	MRFAP1
397	< 1e-07	< 1e-07	0.178571	93.38	1307.06	0.071	ILMN_2128795	LRIG1
398	< 1e-07	< 1e-07	0.178571	88.6	892.74	0.099	ILMN_2075927	STK40
399	< 1e-07	< 1e-07	0.178571	86.94	385.99	0.23	ILMN_1725312	RASA1
400	< 1e-07	< 1e-07	0.178571	86.9	1895.51	0.046	ILMN_2112301	DRAP1
401	< 1e-07	< 1e-07	0.178571	6897.01	1122.69	6.14	ILMN_2345837	CLTA
402	< 1e-07	< 1e-07	0.178571	94.53	1939.95	0.049	ILMN_1656682	AZIN1
403	< 1e-07	< 1e-07	0.178571	89.64	2436.04	0.037	ILMN_2089073	ATP9A
404	< 1e-07	< 1e-07	0.178571	2919.2	122.44	23.84	ILMN_1718128	PABPC3
405	< 1e-07	< 1e-07	0.178571	2360.26	158.32	14.91	ILMN_1763007	HIAT1
406	< 1e-07	< 1e-07	0.178571	14193.2	117.23	121.07	ILMN_1782611	LOC643870
407	< 1e-07	< 1e-07	0.178571	92.43	440.71	0.21	ILMN_1738558	RGS20
408	< 1e-07	< 1e-07	0.178571	92.9	1068.75	0.087	ILMN_1718672	NHP2
409	< 1e-07	< 1e-07	0.178571	91.25	678.77	0.13	ILMN_1717674	PEPD
410	< 1e-07	< 1e-07	0.178571	91.96	3116.09	0.03	ILMN_2052790	NONO
411	< 1e-07	< 1e-07	0.178571	108.84	3569.05	0.03	ILMN_1693311	TMBIM6
412	< 1e-07	< 1e-07	0.178571	90.05	400.19	0.23	ILMN_1788607	RPL23A
413	< 1e-07	< 1e-07	0.178571	90.32	544.29	0.17	ILMN_1718610	ARHGAP17
414	< 1e-07	< 1e-07	0.178571	92.47	1683.44	0.055	ILMN_1760256	RBM22
415	< 1e-07	< 1e-07	0.178571	95.84	2182.95	0.044	ILMN_2294762	AMY1A
416	< 1e-07	< 1e-07	0.178571	86.69	1074.61	0.081	ILMN_2255310	RPS15A
417	< 1e-07	< 1e-07	0.178571	1936.36	95.5	20.28	ILMN_1658660	ACTC1
418	< 1e-07	< 1e-07	0.178571	92.12	1469.51	0.063	ILMN_1796407	SS18L2
419	< 1e-07	< 1e-07	0.178571	101.02	1025.45	0.099	ILMN_1728298	SBK1
420	< 1e-07	< 1e-07	0.178571	8783.16	632.89	13.88	ILMN_1696485	HNRNPAB
421	< 1e-07	< 1e-07	0.178571	107.46	374.77	0.29	ILMN_1792951	ZHX2
422	< 1e-07	< 1e-07	0.178571	2490.94	105.29	23.66	ILMN_1806510	VPS53
423	< 1e-07	< 1e-07	0.178571	91.4	834.65	0.11	ILMN_1761113	GNL2
424	< 1e-07	< 1e-07	0.178571	97.23	467.49	0.21	ILMN_1696713	POLA2
425	< 1e-07	< 1e-07	0.178571	4772.99	636.76	7.5	ILMN_2333367	FKBP1A
426	< 1e-07	< 1e-07	0.178571	98.61	4043.03	0.024	ILMN_1660718	GABBR2
427	< 1e-07	< 1e-07	0.178571	92.53	2279.27	0.041	ILMN_1802615	CDK6
428	< 1e-07	< 1e-07	0.178571	91.44	1220.22	0.075	ILMN_1710326	CLDND1
429	< 1e-07	< 1e-07	0.178571	100.13	4122.58	0.024	ILMN_1723467	ITGB1
430	< 1e-07	< 1e-07	0.178571	106.81	3039.95	0.035	ILMN_1737398	PTPLAD1
431	< 1e-07	< 1e-07	0.178571	94.36	416.84	0.23	ILMN_1761969	DERL2
432	< 1e-07	< 1e-07	0.178571	92.86	986.97	0.094	ILMN_2376133	KIAA1191
433	< 1e-07	< 1e-07	0.178571	90.51	645.81	0.14	ILMN_1738346	EFHA1
434	< 1e-07	< 1e-07	0.178571	103	2821.82	0.037	ILMN_1720889	SC4MOL
435	< 1e-07	< 1e-07	0.178571	98.67	737.5	0.13	ILMN_1760741	NDUFA9
436	< 1e-07	< 1e-07	0.178571	88.06	479.27	0.18	ILMN_2041190	F2RL1
437	< 1e-07	< 1e-07	0.178571	85.84	702.16	0.12	ILMN_1760855	OCRL
438	< 1e-07	< 1e-07	0.178571	2093.46	142.32	14.71	ILMN_2282077	MIB2
439	< 1e-07	< 1e-07	0.178571	103.11	2735.34	0.038	ILMN_1695290	FERMT2
440	< 1e-07	< 1e-07	0.178571	5472.01	88.84	61.6	ILMN_1780460	C9orf41
441	< 1e-07	< 1e-07	0.178571	90.53	1116.61	0.081	ILMN_1792356	DPYSL4
442	< 1e-07	< 1e-07	0.178571	107.87	1605.75	0.067	ILMN_1786065	UHRF1
443	< 1e-07	< 1e-07	0.178571	100.27	1136.83	0.088	ILMN_2386016	C2orf28
444	< 1e-07	< 1e-07	0.178571	97.99	837.99	0.12	ILMN_1664466	KLHL9
445	< 1e-07	< 1e-07	0.178571	95.44	1833.66	0.052	ILMN_1694268	HES6
446	< 1e-07	< 1e-07	0.178571	88.37	2238.89	0.039	ILMN_1717868	CCT8
447	< 1e-07	< 1e-07	0.178571	101.15	2517.83	0.04	ILMN_1728049	S100A16
448	< 1e-07	< 1e-07	0.178571	92.34	498.98	0.19	ILMN_1700518	HMGN4
449	< 1e-07	< 1e-07	0.178571	97.09	1150.31	0.084	ILMN_2392352	CTPS2
450	< 1e-07	< 1e-07	0.178571	95.37	931.91	0.1	ILMN_2388507	AKT1
451	< 1e-07	< 1e-07	0.178571	1503.16	188.69	7.97	ILMN_1662719	GPBP1L1
452	< 1e-07	< 1e-07	0.178571	93.76	651.99	0.14	ILMN_1730879	CBY1
453	< 1e-07	< 1e-07	0.178571	89.11	292.48	0.3	ILMN_1700024	UST
454	< 1e-07	< 1e-07	0.178571	93.91	2089.82	0.045	ILMN_1799604	OCIAD1
455	< 1e-07	< 1e-07	0.178571	104.6	2637.66	0.04	ILMN_1773906	NCOA4
456	< 1e-07	< 1e-07	0.178571	85.66	1885.01	0.045	ILMN_1731546	RPL26
457	< 1e-07	< 1e-07	0.178571	90.37	1215.06	0.074	ILMN_3243859	NDUFB9
458	< 1e-07	< 1e-07	0.178571	2213.98	99.7	22.21	ILMN_2189314	HDGFL1
459	< 1e-07	< 1e-07	0.178571	86.85	4259.11	0.02	ILMN_2144088	FDFT1
460	< 1e-07	< 1e-07	0.178571	1536.61	137.79	11.15	ILMN_1723743	ROM1
461	< 1e-07	< 1e-07	0.178571	4580.92	204.83	22.36	ILMN_3304203	LOC729342
462	< 1e-07	< 1e-07	0.178571	89.19	279.29	0.32	ILMN_1782129	ZBED4
463	< 1e-07	< 1e-07	0.178571	92.98	319.88	0.29	ILMN_1790575	METTL13
464	< 1e-07	< 1e-07	0.178571	87.24	2640.1	0.033	ILMN_2387696	CCR6
465	< 1e-07	< 1e-07	0.178571	85.01	735.39	0.12	ILMN_1664833	MRPL50
466	< 1e-07	< 1e-07	0.178571	93.17	347.11	0.27	ILMN_1712751	HADHA
467	< 1e-07	< 1e-07	0.178571	100.26	1543.13	0.065	ILMN_2367191	PSMF1
468	< 1e-07	< 1e-07	0.178571	107.05	1011.86	0.11	ILMN_1779735	C7orf59
469	< 1e-07	< 1e-07	0.178571	89.37	830.65	0.11	ILMN_1761981	FAM96A
470	< 1e-07	< 1e-07	0.178571	5011.21	101.55	49.35	ILMN_1742833	LOC644436
471	< 1e-07	< 1e-07	0.178571	8084.38	431.04	18.76	ILMN_1708743	NT5DC2
472	< 1e-07	< 1e-07	0.178571	91.38	259.85	0.35	ILMN_1763144	NEU1
473	< 1e-07	< 1e-07	0.178571	91.29	3340.06	0.027	ILMN_1655765	MRPS21
474	< 1e-07	< 1e-07	0.178571	110.9	784.34	0.14	ILMN_1696046	SIVA
475	< 1e-07	< 1e-07	0.178571	12651.3	399.35	31.68	ILMN_3226613	LOC729686
476	< 1e-07	< 1e-07	0.178571	88.48	619.05	0.14	ILMN_1664931	GTF2E2
477	< 1e-07	< 1e-07	0.178571	1329.7	133.73	9.94	ILMN_1652160	LRBA
478	< 1e-07	< 1e-07	0.178571	97.78	2177.21	0.045	ILMN_1718988	DAZAP2
479	< 1e-07	< 1e-07	0.178571	105.69	1165.87	0.091	ILMN_1667050	PRPS1
480	< 1e-07	< 1e-07	0.178571	87.72	848.88	0.1	ILMN_1805992	KIAA1598
481	< 1e-07	< 1e-07	0.178571	93.29	1328.46	0.07	ILMN_1786189	MKI67IP
482	< 1e-07	< 1e-07	0.178571	96.24	1200.52	0.08	ILMN_3236481	LOC100129086
483	< 1e-07	< 1e-07	0.178571	88.76	4410.46	0.02	ILMN_1784871	FASN
484	< 1e-07	< 1e-07	0.178571	2392.72	320.38	7.47	ILMN_3275771	LOC642567
485	< 1e-07	< 1e-07	0.178571	90.88	1076.22	0.084	ILMN_1718132	ECHS1
486	< 1e-07	< 1e-07	0.178571	107.55	5705.72	0.019	ILMN_1737015	RPL39
487	< 1e-07	< 1e-07	0.178571	116.12	7309.06	0.016	ILMN_3206866	LOC100132593
488	< 1e-07	< 1e-07	0.178571	101.09	1457.88	0.069	ILMN_1682694	LOC203547
489	< 1e-07	< 1e-07	0.178571	98.12	1442.81	0.068	ILMN_1655497	EIF4B
490	< 1e-07	< 1e-07	0.178571	92.15	366.98	0.25	ILMN_1772316	UNC84A
491	< 1e-07	< 1e-07	0.178571	109.34	5973.65	0.018	ILMN_2326713	CD151
492	< 1e-07	< 1e-07	0.178571	89.6	579.44	0.15	ILMN_2355462	CYFIP1
493	< 1e-07	< 1e-07	0.178571	87.39	438.4	0.2	ILMN_1758626	IDS
494	< 1e-07	< 1e-07	0.178571	93.27	1184.46	0.079	ILMN_2366634	PKM2
495	< 1e-07	< 1e-07	0.178571	104.36	1515.24	0.069	ILMN_1809477	CARHSP1
496	< 1e-07	< 1e-07	0.178571	107.68	863.86	0.12	ILMN_1715647	VANGL2
497	< 1e-07	< 1e-07	0.178571	1787.31	304	5.88	ILMN_1689704	TMEM5
498	< 1e-07	< 1e-07	0.178571	101.46	696.08	0.15	ILMN_1688526	ARL5A
499	< 1e-07	< 1e-07	0.178571	91.87	578.95	0.16	ILMN_1713759	UBE2J1
500	< 1e-07	< 1e-07	0.178571	96.85	1594.9	0.061	ILMN_1769520	UBE2L6
501	< 1e-07	< 1e-07	0.178571	1670.11	153.68	10.87	ILMN_1692916	LOC646135
502	< 1e-07	< 1e-07	0.178571	84.59	499.16	0.17	ILMN_1713688	DHX32
503	< 1e-07	< 1e-07	0.178571	89.28	728.7	0.12	ILMN_1673704	INA
504	< 1e-07	< 1e-07	0.178571	86.89	424.62	0.2	ILMN_1696065	SDF4
505	< 1e-07	< 1e-07	0.178571	1237.73	131.06	9.44	ILMN_1880103
506	< 1e-07	< 1e-07	0.178571	93.9	3774.91	0.025	ILMN_2232936	UQCRH
507	< 1e-07	< 1e-07	0.178571	99.8	1401.6	0.071	ILMN_1733696	IMP3
508	< 1e-07	< 1e-07	0.178571	1599.02	123.5	12.95	ILMN_3242176	UBR3
509	< 1e-07	< 1e-07	0.178571	98.37	885.14	0.11	ILMN_1706959	TIMM22
510	< 1e-07	< 1e-07	0.178571	109.73	1183.76	0.093	ILMN_1746171	H2AFY
511	< 1e-07	< 1e-07	0.178571	113.2	6977.62	0.016	ILMN_2142815	RPL35
512	< 1e-07	< 1e-07	0.178571	85.36	609.89	0.14	ILMN_1702125	HOXB7
513	< 1e-07	< 1e-07	0.178571	101.33	4758.4	0.021	ILMN_3201115	LOC440043
514	< 1e-07	< 1e-07	0.178571	89.06	674.34	0.13	ILMN_1749009	REXO2
515	< 1e-07	< 1e-07	0.178571	99.49	1000.39	0.099	ILMN_1719906	HADH
516	< 1e-07	< 1e-07	0.178571	1817.75	128.97	14.09	ILMN_1753008	REXO1
517	< 1e-07	< 1e-07	0.178571	111.03	1460.19	0.076	ILMN_1661174	LOC731640
518	< 1e-07	< 1e-07	0.178571	87.97	1453.64	0.061	ILMN_1768784	PSMC2
519	< 1e-07	< 1e-07	0.178571	87.2	560.84	0.16	ILMN_1770206	GEMIN4
520	< 1e-07	< 1e-07	0.178571	101.5	3413.46	0.03	ILMN_1721876	TIMP2
521	< 1e-07	< 1e-07	0.178571	89.2	966.95	0.092	ILMN_1781097	UBXN4
522	< 1e-07	< 1e-07	0.178571	6868.91	487.96	14.08	ILMN_2336781	SOD2
523	< 1e-07	< 1e-07	0.178571	99.38	1431.8	0.069	ILMN_1698307	DBNL
524	< 1e-07	< 1e-07	0.178571	121.35	1635.34	0.074	ILMN_3247645	LOC550643
525	< 1e-07	< 1e-07	0.178571	97.23	2025.03	0.048	ILMN_1792489	ARPC2
526	< 1e-07	< 1e-07	0.178571	102.11	4218.42	0.024	ILMN_3291098	LOC643531
527	< 1e-07	< 1e-07	0.178571	104.42	1236.2	0.084	ILMN_1814204	C21orf55
528	< 1e-07	< 1e-07	0.178571	2296.01	136.68	16.8	ILMN_1755620	IER5L
529	< 1e-07	< 1e-07	0.178571	85.57	684.97	0.12	ILMN_2093500	ZBED5
530	< 1e-07	< 1e-07	0.178571	92.15	639.02	0.14	ILMN_1693045	TMED1
531	< 1e-07	< 1e-07	0.178571	99.06	1123.1	0.088	ILMN_3256478	LOC100129034
532	< 1e-07	< 1e-07	0.178571	88.54	2534.34	0.035	ILMN_1690982	DDT
533	< 1e-07	< 1e-07	0.178571	88.19	771.77	0.11	ILMN_2395728	HNRPUL1
534	< 1e-07	< 1e-07	0.178571	94.41	294.64	0.32	ILMN_2381841	DDX19B
535	< 1e-07	< 1e-07	0.178571	107.79	1878.44	0.057	ILMN_1722634	NUCB1
536	< 1e-07	< 1e-07	0.178571	87.33	1543.91	0.057	ILMN_2323774	RPAIN
537	< 1e-07	< 1e-07	0.178571	85.51	1007.35	0.085	ILMN_1779185	CYTSA
538	< 1e-07	< 1e-07	0.178571	94.1	1892.1	0.05	ILMN_1693490	SEC11A
539	< 1e-07	< 1e-07	0.178571	86.22	847.66	0.1	ILMN_1691572	TST
540	< 1e-07	< 1e-07	0.178571	940.92	103.28	9.11	ILMN_1815639	GIGYF1
541	< 1e-07	< 1e-07	0.178571	3055.79	195.81	15.61	ILMN_1741253	UBR5
542	< 1e-07	< 1e-07	0.178571	92.1	455.83	0.2	ILMN_1783285	CTPS
543	< 1e-07	< 1e-07	0.178571	88.01	2904.4	0.03	ILMN_1815673	DKK3
544	< 1e-07	< 1e-07	0.178571	94.77	406.47	0.23	ILMN_3244583	NCRNA00219
545	< 1e-07	< 1e-07	0.178571	90.84	474.35	0.19	ILMN_1701558	MAP1A
546	< 1e-07	< 1e-07	0.178571	88.67	994.9	0.089	ILMN_1737146	TRAM1
547	< 1e-07	< 1e-07	0.178571	92.04	301.78	0.3	ILMN_1736828	CHST10
548	< 1e-07	< 1e-07	0.178571	90.95	451.2	0.2	ILMN_2288784	CCDC34
549	< 1e-07	< 1e-07	0.178571	102.35	616.75	0.17	ILMN_1838313
550	< 1e-07	< 1e-07	0.178571	90.74	366.81	0.25	ILMN_2051232	SDHA
551	< 1e-07	< 1e-07	0.178571	101.67	1690.97	0.06	ILMN_1662130	LOC730316
552	< 1e-07	< 1e-07	0.178571	81.58	606.55	0.13	ILMN_1678140	TTC4
553	< 1e-07	< 1e-07	0.178571	98.74	2486.48	0.04	ILMN_1654016	MRLC2
554	< 1e-07	< 1e-07	0.178571	98.96	518.24	0.19	ILMN_1695370	LOC645968
555	< 1e-07	< 1e-07	0.178571	87.52	773.6	0.11	ILMN_1659766	BAG3
556	< 1e-07	< 1e-07	0.178571	90.08	451.22	0.2	ILMN_1692168	UBE2Z
557	< 1e-07	< 1e-07	0.178571	98.88	251.75	0.39	ILMN_1813625	TRIM25
558	< 1e-07	< 1e-07	0.178571	96.48	799.96	0.12	ILMN_1747771	LOC730744
559	< 1e-07	< 1e-07	0.178571	87.84	274.44	0.32	ILMN_1721758	ID4
560	< 1e-07	< 1e-07	0.178571	87.81	1440.42	0.061	ILMN_1787705	ATP6V1B2
561	< 1e-07	< 1e-07	0.178571	103.31	14678	0.007	ILMN_2141453	RPL18A
562	< 1e-07	< 1e-07	0.178571	86.41	606.37	0.14	ILMN_1733511	GOLGA3
563	< 1e-07	< 1e-07	0.178571	91.61	1332.6	0.069	ILMN_1785170	ARMCX2
564	< 1e-07	< 1e-07	0.178571	111.55	9019.13	0.012	ILMN_1746085	IGFBP3
565	< 1e-07	< 1e-07	0.178571	95.29	5834.72	0.016	ILMN_1652207	COX4I1
566	< 1e-07	< 1e-07	0.178571	4063.18	263.1	15.44	ILMN_1692844	TBC1D19
567	< 1e-07	< 1e-07	0.178571	95.09	6129.41	0.016	ILMN_3281599	LOC642741
568	< 1e-07	< 1e-07	0.178571	94.64	1519.89	0.062	ILMN_1730622	EVL
569	< 1e-07	< 1e-07	0.178571	102.96	1453.34	0.071	ILMN_2414014	RBM10
570	< 1e-07	< 1e-07	0.178571	86	548.02	0.16	ILMN_1717056	TXNRD1
571	< 1e-07	< 1e-07	0.178571	94.43	1482.4	0.064	ILMN_2389590	PRKAR1A
572	< 1e-07	< 1e-07	0.178571	90.47	480.48	0.19	ILMN_2406043	VPS24
573	< 1e-07	< 1e-07	0.178571	90.23	697.19	0.13	ILMN_2228873	STARD3NL
574	< 1e-07	< 1e-07	0.178571	107.96	5806.31	0.019	ILMN_1731174	LOC647856
575	< 1e-07	< 1e-07	0.178571	92.77	820.45	0.11	ILMN_2050023	CCDC23
576	< 1e-07	< 1e-07	0.178571	111.13	1788.18	0.062	ILMN_1811615	COPA
577	< 1e-07	< 1e-07	0.178571	85.12	416.69	0.2	ILMN_1658619	WWC1
578	< 1e-07	< 1e-07	0.178571	93.23	1087.6	0.086	ILMN_2199439	CA2
579	< 1e-07	< 1e-07	0.178571	85.6	406.52	0.21	ILMN_1676946	AP3M2
580	< 1e-07	< 1e-07	0.178571	2670.72	197.49	13.52	ILMN_1813594	PREI3
581	< 1e-07	< 1e-07	0.178571	84.61	206.87	0.41	ILMN_1676423	CCNC
582	< 1e-07	< 1e-07	0.178571	92.26	202.9	0.45	ILMN_1743352	TBCC
583	< 1e-07	< 1e-07	0.178571	91.6	438.22	0.21	ILMN_1806106	GNL3
584	< 1e-07	< 1e-07	0.178571	103.64	286.82	0.36	ILMN_1788254	PGAM5
585	< 1e-07	< 1e-07	0.178571	89.48	341.59	0.26	ILMN_1651385	MFN2
586	< 1e-07	< 1e-07	0.178571	85.5	449.84	0.19	ILMN_1744912	CTTN
587	< 1e-07	< 1e-07	0.178571	89.91	3403.96	0.026	ILMN_1659437	TXNDC17
588	< 1e-07	< 1e-07	0.178571	1103.77	162.3	6.8	ILMN_1715175	MET
589	< 1e-07	< 1e-07	0.178571	97.45	495.37	0.2	ILMN_1662318	CCDC59
590	< 1e-07	< 1e-07	0.178571	14008.2	415.03	33.75	ILMN_3290019	LOC646753
591	< 1e-07	< 1e-07	0.178571	91.02	706.46	0.13	ILMN_1756220	DDX18
592	< 1e-07	< 1e-07	0.178571	88.84	756.41	0.12	ILMN_1789507	COL11A1
593	< 1e-07	< 1e-07	0.178571	97.49	407.23	0.24	ILMN_1768510	MAN2B2
594	< 1e-07	< 1e-07	0.178571	94.83	1064.59	0.089	ILMN_3227811	LOC729423
595	< 1e-07	< 1e-07	0.178571	104.77	3673.67	0.029	ILMN_1718136	UQCRHL
596	< 1e-07	< 1e-07	0.178571	2635.36	275.67	9.56	ILMN_1727361	LEMD3
597	< 1e-07	< 1e-07	0.178571	91.1	523.33	0.17	ILMN_1801941	C1orf50
598	< 1e-07	< 1e-07	0.178571	101.64	332.54	0.31	ILMN_1801387	YEATS4
599	< 1e-07	< 1e-07	0.178571	101.17	210.67	0.48	ILMN_2339705	MED8
600	< 1e-07	< 1e-07	0.178571	100.42	12423.1	0.0081	ILMN_3246850	LOC648729
601	< 1e-07	< 1e-07	0.178571	87.19	589.84	0.15	ILMN_1764410	C22orf13
602	< 1e-07	< 1e-07	0.178571	94.15	1052.79	0.089	ILMN_1715583	BOP1
603	< 1e-07	< 1e-07	0.178571	97.09	1029.8	0.094	ILMN_1685097	ASCC1
604	< 1e-07	< 1e-07	0.178571	97.7	738.76	0.13	ILMN_1744147	CEBPZ
605	< 1e-07	< 1e-07	0.178571	92.02	795.5	0.12	ILMN_1743049	PWP1
606	< 1e-07	< 1e-07	0.178571	3051.41	128.39	23.77	ILMN_3205924	LOC651198
607	< 1e-07	< 1e-07	0.178571	85.53	406.6	0.21	ILMN_1711069	YPEL5
608	< 1e-07	< 1e-07	0.178571	90.51	192.08	0.47	ILMN_2147114	PSPH
609	< 1e-07	< 1e-07	0.178571	103.98	607.29	0.17	ILMN_2209748	DERL1
610	< 1e-07	< 1e-07	0.178571	88.4	391.92	0.23	ILMN_1811997	ZNF364
611	< 1e-07	< 1e-07	0.178571	1346.94	151.93	8.87	ILMN_1680436	CSHL1
612	< 1e-07	< 1e-07	0.178571	105	350.24	0.3	ILMN_3251445	MED27
613	< 1e-07	< 1e-07	0.178571	107.2	1340.49	0.08	ILMN_1655595	SERPINE2
614	< 1e-07	< 1e-07	0.178571	91.68	270.51	0.34	ILMN_1788250	LDOC1
615	< 1e-07	< 1e-07	0.178571	104.07	898.74	0.12	ILMN_2081335	C7orf44
616	< 1e-07	< 1e-07	0.178571	4885.26	209.32	23.34	ILMN_1691402	LOC644162
617	< 1e-07	< 1e-07	0.178571	88.91	1465.43	0.061	ILMN_1768127	EBNA1BP2
618	< 1e-07	< 1e-07	0.178571	2955.85	174.25	16.96	ILMN_2363439	RYK
619	< 1e-07	< 1e-07	0.178571	2215.97	101.45	21.84	ILMN_1654942	NFIC
620	< 1e-07	< 1e-07	0.178571	91.55	990.71	0.092	ILMN_3247462	GLRX3
621	< 1e-07	< 1e-07	0.178571	3332.99	226.09	14.74	ILMN_2264625	NIPBL
622	< 1e-07	< 1e-07	0.178571	96.72	1213.08	0.08	ILMN_1803824	ZDHHC9
623	< 1e-07	< 1e-07	0.178571	85.35	1678.8	0.051	ILMN_2304624	EIF4H
624	< 1e-07	< 1e-07	0.178571	103.71	3290.43	0.032	ILMN_1797604	CAP1
625	< 1e-07	< 1e-07	0.178571	97.98	599.3	0.16	ILMN_1787844	C19orf10
626	< 1e-07	< 1e-07	0.178571	3922.94	150.99	25.98	ILMN_1746396	CTNNB1
627	< 1e-07	< 1e-07	0.178571	90.07	761.88	0.12	ILMN_2047599	TMEM50B
628	< 1e-07	< 1e-07	0.178571	97.58	1333.04	0.073	ILMN_1670379	ANTXR1
629	< 1e-07	< 1e-07	0.178571	100.58	577.46	0.17	ILMN_1716407	SORBS2
630	< 1e-07	< 1e-07	0.178571	92.2	445.97	0.21	ILMN_1686194	SDCCAG10
631	< 1e-07	< 1e-07	0.178571	5151.74	255.06	20.2	ILMN_3223317	LOC728666
632	< 1e-07	< 1e-07	0.178571	87.78	294.94	0.3	ILMN_1791896	EBAG9
633	< 1e-07	< 1e-07	0.178571	98.32	2430.78	0.04	ILMN_1783636	COX6A1
634	< 1e-07	< 1e-07	0.178571	88.85	715.84	0.12	ILMN_1673604	YIPF3
635	< 1e-07	< 1e-07	0.178571	4743.9	214.37	22.13	ILMN_1664826	FBXO33
636	< 1e-07	< 1e-07	0.178571	106.07	515.52	0.21	ILMN_2097858	KIAA1737
637	< 1e-07	< 1e-07	0.178571	3282.47	271.36	12.1	ILMN_2340721	TMEM134
638	< 1e-07	< 1e-07	0.178571	115.78	8265.07	0.014	ILMN_2409167	ANXA2
639	< 1e-07	< 1e-07	0.178571	121.53	12526.7	0.0097	ILMN_1684258	LOC646195
640	< 1e-07	< 1e-07	0.178571	1344.57	121.89	11.03	ILMN_1680899	TTLL3
641	< 1e-07	< 1e-07	0.178571	2978.91	276.71	10.77	ILMN_1789283	PPP2R5C
642	< 1e-07	< 1e-07	0.178571	93.96	1250.07	0.075	ILMN_1777378	COMMD6
643	< 1e-07	< 1e-07	0.178571	3462.6	236.68	14.63	ILMN_1670096	NRBP1
644	< 1e-07	< 1e-07	0.178571	97.46	593.97	0.16	ILMN_2177090	LOC200030
645	< 1e-07	< 1e-07	0.178571	108.55	836.36	0.13	ILMN_1691376	JAG1
646	< 1e-07	< 1e-07	0.178571	97.15	8010.44	0.012	ILMN_3225938	LOC729402
647	< 1e-07	< 1e-07	0.178571	87.4	951.95	0.092	ILMN_1731181	TEX2
648	< 1e-07	< 1e-07	0.178571	10584.1	3325.01	3.18	ILMN_1745385	HNRPM
649	< 1e-07	< 1e-07	0.178571	100.02	1999.82	0.05	ILMN_3310491	MIR1978
650	< 1e-07	< 1e-07	0.178571	98.76	1167.55	0.085	ILMN_1722809	NRCAM
651	< 1e-07	< 1e-07	0.178571	92.42	607.63	0.15	ILMN_1661491	SH3GL2
652	< 1e-07	< 1e-07	0.178571	89.01	853.25	0.1	ILMN_1799516	DNAJC9
653	< 1e-07	< 1e-07	0.178571	89.71	661.54	0.14	ILMN_1705116	C6orf85
654	< 1e-07	< 1e-07	0.178571	90.74	442.41	0.21	ILMN_1742578	MKLN1
655	< 1e-07	< 1e-07	0.178571	96.24	556.13	0.17	ILMN_1707503	C1orf144
656	< 1e-07	< 1e-07	0.178571	90.33	406.55	0.22	ILMN_2397721	GLB1
657	< 1e-07	< 1e-07	0.178571	89.16	312.64	0.29	ILMN_1771688	RAB7B
658	< 1e-07	< 1e-07	0.178571	2068.89	121.31	17.05	ILMN_1742145	ESPL1
659	< 1e-07	< 1e-07	0.178571	85.93	1718.46	0.05	ILMN_2367753	ATP2B4
660	< 1e-07	< 1e-07	0.178571	3825.88	220.49	17.35	ILMN_3242120	RAP1BL
661	< 1e-07	< 1e-07	0.178571	85.4	414.99	0.21	ILMN_1667068	ZC3HAV1
662	< 1e-07	< 1e-07	0.178571	95.84	1185.02	0.081	ILMN_1743911	SLC25A39
663	< 1e-07	< 1e-07	0.178571	1577.62	124.2	12.7	ILMN_1797201	KRTAP10-2
664	< 1e-07	< 1e-07	0.178571	1394.32	128.69	10.83	ILMN_3236211	DGCR11
665	< 1e-07	< 1e-07	0.178571	89.1	348.63	0.26	ILMN_1727271	WARS
666	< 1e-07	< 1e-07	0.178571	107.71	2306.05	0.047	ILMN_1805842	FHL1
667	< 1e-07	< 1e-07	0.178571	88.21	341.56	0.26	ILMN_2358652	NXF1
668	< 1e-07	< 1e-07	0.178571	91.12	405.24	0.22	ILMN_1660749	ASPSCR1
669	< 1e-07	< 1e-07	0.178571	96	614.59	0.16	ILMN_1663399	TIMP4
670	< 1e-07	< 1e-07	0.178571	94.52	613.08	0.15	ILMN_2339202	KTN1
671	< 1e-07	< 1e-07	0.178571	95.39	566.25	0.17	ILMN_2191436	POLA1
672	< 1e-07	< 1e-07	0.178571	1559	130.02	11.99	ILMN_3223246	TBC1D3F
673	< 1e-07	< 1e-07	0.178571	93.26	717.75	0.13	ILMN_1814113	ZFR
674	< 1e-07	< 1e-07	0.178571	89.05	901.87	0.099	ILMN_1705464	MRPL41
675	< 1e-07	< 1e-07	0.178571	91.29	264.35	0.35	ILMN_1733690	AKAP7
676	< 1e-07	< 1e-07	0.178571	100.72	592.15	0.17	ILMN_3290100	LOC645157
677	< 1e-07	< 1e-07	0.178571	3142.6	239.26	13.13	ILMN_1786125	CCNA2
678	< 1e-07	< 1e-07	0.178571	93.17	288.43	0.32	ILMN_1729180	GATM
679	< 1e-07	< 1e-07	0.178571	88.5	292.77	0.3	ILMN_2402168	EXOSC10
680	< 1e-07	< 1e-07	0.178571	105.52	1441.08	0.073	ILMN_3211935	LOC100132715
681	< 1e-07	< 1e-07	0.178571	1603.55	110.22	14.55	ILMN_1718679	USP19
682	< 1e-07	< 1e-07	0.178571	92.31	468.97	0.2	ILMN_1722838	MRPL46
683	< 1e-07	< 1e-07	0.178571	87.89	734.12	0.12	ILMN_1760858	RAB8A
684	< 1e-07	< 1e-07	0.178571	1745.51	125.35	13.93	ILMN_1744244	DPAGT1
685	< 1e-07	< 1e-07	0.178571	93.15	301.56	0.31	ILMN_1785926	ZNF621
686	< 1e-07	< 1e-07	0.178571	99.17	516.39	0.19	ILMN_1809027	ATP5SL
687	< 1e-07	< 1e-07	0.178571	87.33	283.26	0.31	ILMN_2288070	FTO
688	< 1e-07	< 1e-07	0.178571	90.75	732.12	0.12	ILMN_2143148	TM2D1
689	< 1e-07	< 1e-07	0.178571	94.02	1781.67	0.053	ILMN_1669273	PPT1
690	< 1e-07	< 1e-07	0.178571	102.04	625.09	0.16	ILMN_1792660	CAMSAP1L1
691	< 1e-07	< 1e-07	0.178571	93.29	459.17	0.2	ILMN_1770678	CBX2
692	< 1e-07	< 1e-07	0.178571	2965.36	92.88	31.93	ILMN_1689114	SFTPA2B
693	< 1e-07	< 1e-07	0.178571	84.42	397.51	0.21	ILMN_1723414	HACL1
694	< 1e-07	< 1e-07	0.178571	92.99	713.01	0.13	ILMN_1815012	EXOC7
695	< 1e-07	< 1e-07	0.178571	87.84	779.11	0.11	ILMN_1773576	CPNE3
696	< 1e-07	< 1e-07	0.178571	92.16	454.52	0.2	ILMN_2216852	PGK1
697	< 1e-07	< 1e-07	0.178571	107.76	1526.72	0.071	ILMN_2079386	RPL22
698	< 1e-07	< 1e-07	0.178571	98.42	1236.95	0.08	ILMN_1815039	C6orf153
699	< 1e-07	< 1e-07	0.178571	92.99	781.04	0.12	ILMN_1755727	KDM5B
700	< 1e-07	< 1e-07	0.178571	105.23	831.71	0.13	ILMN_2305225	NDRG4
701	< 1e-07	< 1e-07	0.178571	6301.63	437.08	14.42	ILMN_1826531
702	< 1e-07	< 1e-07	0.178571	100.76	2137.69	0.047	ILMN_2224143	MCM3
703	< 1e-07	< 1e-07	0.178571	90.31	1232.27	0.073	ILMN_2049642	RPA1
704	< 1e-07	< 1e-07	0.178571	105.66	2392.75	0.044	ILMN_1664956	SSU72
705	< 1e-07	< 1e-07	0.178571	90.81	1057.52	0.086	ILMN_2093027	MYO1B
706	< 1e-07	< 1e-07	0.178571	96.13	470.98	0.2	ILMN_1747775	STX2
707	< 1e-07	< 1e-07	0.178571	101.22	659.83	0.15	ILMN_1775330	C15orf52
708	< 1e-07	< 1e-07	0.178571	2407.2	99.44	24.21	ILMN_1803698	STX16
709	< 1e-07	< 1e-07	0.178571	104.9	1138.64	0.092	ILMN_1727309	FAM82A2
710	< 1e-07	< 1e-07	0.178571	89.71	846.62	0.11	ILMN_1736340	ANGEL2
711	< 1e-07	< 1e-07	0.178571	89.4	996.61	0.09	ILMN_2261519	AIRE
712	< 1e-07	< 1e-07	0.178571	99.74	1076.46	0.093	ILMN_1751803	LSM10
713	< 1e-07	< 1e-07	0.178571	101.48	722.09	0.14	ILMN_1766435	WBP11
714	< 1e-07	< 1e-07	0.178571	89.94	357.02	0.25	ILMN_1773855	CPT1C
715	< 1e-07	< 1e-07	0.178571	90.61	1031.79	0.088	ILMN_1799367	TXNDC14
716	< 1e-07	< 1e-07	0.178571	99.41	1172.29	0.085	ILMN_2186061	PFKFB3
717	< 1e-07	< 1e-07	0.178571	90.5	2345.39	0.039	ILMN_1698179	TAGLN3
718	< 1e-07	< 1e-07	0.178571	96.62	1566.06	0.062	ILMN_2216637	STK32B
719	< 1e-07	< 1e-07	0.178571	1745.14	136.86	12.75	ILMN_1753925	LOC645609
720	< 1e-07	< 1e-07	0.178571	5008.49	385.41	13	ILMN_2215640	TUBA3D
721	< 1e-07	< 1e-07	0.178571	1830.58	95.34	19.2	ILMN_2085525	SNORA32
722	< 1e-07	< 1e-07	0.178571	25786.9	5700.61	4.52	ILMN_1707858	H2AFZ
723	< 1e-07	< 1e-07	0.178571	91.87	189.05	0.49	ILMN_1697286	SF3A1
724	< 1e-07	< 1e-07	0.178571	94.22	646.67	0.15	ILMN_1738656	GLOD4
725	< 1e-07	< 1e-07	0.178571	89.69	424.28	0.21	ILMN_3301740	LOC729887
726	< 1e-07	< 1e-07	0.178571	86.57	605.37	0.14	ILMN_1713380	EIF2B2
727	< 1e-07	< 1e-07	0.178571	92.73	2510.97	0.037	ILMN_1726169	EDF1
728	< 1e-07	< 1e-07	0.178571	1438.29	126.01	11.41	ILMN_3260017	HNRNPK
729	< 1e-07	< 1e-07	0.178571	89.24	2040.25	0.044	ILMN_1769091	PRCP
730	< 1e-07	< 1e-07	0.178571	89.28	888.65	0.1	ILMN_1664921	PPP6C
731	< 1e-07	< 1e-07	0.178571	111.48	2335.57	0.048	ILMN_2211950	SRP14P1
732	< 1e-07	< 1e-07	0.178571	89.77	332.21	0.27	ILMN_1656316	ZMYM3
733	< 1e-07	< 1e-07	0.178571	112.63	378.82	0.3	ILMN_1674941	ANO6
734	< 1e-07	< 1e-07	0.178571	90.2	826.31	0.11	ILMN_1810289	FER1L3
735	< 1e-07	< 1e-07	0.178571	88.16	1109.03	0.079	ILMN_1663002	STOML2
736	< 1e-07	< 1e-07	0.178571	101.41	2623.69	0.039	ILMN_1768396	AURKAIP1
737	< 1e-07	< 1e-07	0.178571	99.51	3303.45	0.03	ILMN_1728605	TTC3
738	< 1e-07	< 1e-07	0.178571	85.39	1930.37	0.044	ILMN_1773760	PAICS
739	< 1e-07	< 1e-07	0.178571	3671.99	121.99	30.1	ILMN_1712095	FOXO4
740	< 1e-07	< 1e-07	0.178571	93.2	2032.07	0.046	ILMN_2161007	GABPB2
741	< 1e-07	< 1e-07	0.178571	93.83	2909.58	0.032	ILMN_1742238	SET
742	< 1e-07	< 1e-07	0.178571	2661.21	159.51	16.68	ILMN_1660079	RNF44
743	< 1e-07	< 1e-07	0.178571	95.7	427.19	0.22	ILMN_1767542	THAP10
744	< 1e-07	< 1e-07	0.178571	96.88	495.59	0.2	ILMN_2381476	SPG3A
745	< 1e-07	< 1e-07	0.178571	91.96	351.72	0.26	ILMN_3199974	LOC100131787
746	< 1e-07	< 1e-07	0.178571	3412.09	165.94	20.56	ILMN_2364529	EZH2
747	< 1e-07	< 1e-07	0.178571	89.19	360.77	0.25	ILMN_1668484	LRRC47
748	< 1e-07	< 1e-07	0.178571	97.02	1153.51	0.084	ILMN_1736567	CD74
749	< 1e-07	< 1e-07	0.178571	101.18	288.53	0.35	ILMN_2306066	FUS
750	< 1e-07	< 1e-07	0.178571	1362.4	94.16	14.47	ILMN_2397294	PLCB4
751	< 1e-07	< 1e-07	0.178571	96.62	1308.67	0.074	ILMN_1746673	2011-09-03
752	< 1e-07	< 1e-07	0.178571	85.04	1881.69	0.045	ILMN_1653856	STS-1
753	< 1e-07	< 1e-07	0.178571	100.95	966.73	0.1	ILMN_2405018	PPP1CB
754	< 1e-07	< 1e-07	0.178571	88.2	275.05	0.32	ILMN_1708029	C9orf127
755	< 1e-07	< 1e-07	0.178571	2836.82	182.95	15.51	ILMN_1693668	KIAA0261
756	< 1e-07	< 1e-07	0.178571	88.09	1623.39	0.054	ILMN_2316806	RWDD1
757	< 1e-07	< 1e-07	0.178571	92.12	1324.14	0.07	ILMN_1722276	PAFAH1B1
758	< 1e-07	< 1e-07	0.178571	92.8	972.62	0.095	ILMN_2180929	SLC16A12
759	< 1e-07	< 1e-07	0.178571	99.17	3026.11	0.033	ILMN_1748438	POLR2G
760	< 1e-07	< 1e-07	0.178571	103.98	898.69	0.12	ILMN_1656837	RBP1
761	< 1e-07	< 1e-07	0.178571	90.79	293.67	0.31	ILMN_1660635	LACTB2
762	< 1e-07	< 1e-07	0.178571	98.15	601.1	0.16	ILMN_1768867	AP3B1
763	< 1e-07	< 1e-07	0.178571	2259.51	187.24	12.07	ILMN_1809695	CAMK2G
764	< 1e-07	< 1e-07	0.178571	6181.52	403	15.34	ILMN_3237507	LOC552889
765	< 1e-07	< 1e-07	0.178571	89.48	470.77	0.19	ILMN_2157951	STX6
766	< 1e-07	< 1e-07	0.178571	102.52	384.12	0.27	ILMN_3249608	ANKLE2
767	< 1e-07	< 1e-07	0.178571	4462.6	273.69	16.31	ILMN_1718907	TSHZ1
768	< 1e-07	< 1e-07	0.178571	111.29	1784.04	0.062	ILMN_1800276	RCN1
769	< 1e-07	< 1e-07	0.178571	84.44	422.5	0.2	ILMN_1788689	PHIP
770	< 1e-07	< 1e-07	0.178571	108.01	2265.41	0.048	ILMN_3300663	LOC728661
771	< 1e-07	< 1e-07	0.178571	6537.6	193.73	33.75	ILMN_1669718	PSENEN
772	< 1e-07	< 1e-07	0.178571	96.39	1064.5	0.091	ILMN_1652246	KIAA0363
773	< 1e-07	< 1e-07	0.178571	97.83	328.64	0.3	ILMN_3234081	LOC100129076
774	< 1e-07	< 1e-07	0.178571	90.05	1110.65	0.081	ILMN_1655418	CAPNS1
775	< 1e-07	< 1e-07	0.178571	6616.54	635.55	10.41	ILMN_3300744	LOC728666
776	< 1e-07	< 1e-07	0.178571	104.75	1564.15	0.067	ILMN_1727194	CALU
777	< 1e-07	< 1e-07	0.178571	114.5	2842.28	0.04	ILMN_1651228	RPS28
778	< 1e-07	< 1e-07	0.178571	95.29	407.21	0.23	ILMN_1653292	PFKFB4
779	< 1e-07	< 1e-07	0.178571	88.6	1155.61	0.077	ILMN_1778236	PTPN11
780	< 1e-07	< 1e-07	0.178571	87.67	1139.72	0.077	ILMN_1669550	MAD2L2
781	< 1e-07	< 1e-07	0.178571	88.25	480.15	0.18	ILMN_1788783	TRAM2
782	< 1e-07	< 1e-07	0.178571	87.88	332.57	0.26	ILMN_1655329	RIOK2
783	< 1e-07	< 1e-07	0.178571	100.66	374.74	0.27	ILMN_2366719	NSFL1C
784	< 1e-07	< 1e-07	0.178571	97.28	546.64	0.18	ILMN_3245517	LOC100134273
785	< 1e-07	< 1e-07	0.178571	938.2	105.15	8.92	ILMN_1759708	LOC643959
786	< 1e-07	< 1e-07	0.178571	92.69	1366.08	0.068	ILMN_1684205	CIB1
787	< 1e-07	< 1e-07	0.178571	101.72	2118.51	0.048	ILMN_1774584	C2orf28
788	< 1e-07	< 1e-07	0.178571	1325.39	131.75	10.06	ILMN_1718831	TMEM57
789	< 1e-07	< 1e-07	0.178571	94.37	720.08	0.13	ILMN_1666192	DCTN5
790	< 1e-07	< 1e-07	0.178571	96.94	1682.24	0.058	ILMN_2220283	HNRPA1L-2
791	< 1e-07	< 1e-07	0.178571	91.94	724.97	0.13	ILMN_1757287	MAPK6
792	< 1e-07	< 1e-07	0.178571	1243.45	97.2	12.79	ILMN_1808011	FAM46B
793	< 1e-07	< 1e-07	0.178571	90.21	520.2	0.17	ILMN_1671554	LPIN1
794	< 1e-07	< 1e-07	0.178571	88.76	179.6	0.49	ILMN_1809963	RSAD1
795	< 1e-07	< 1e-07	0.178571	88.88	992.57	0.09	ILMN_2217809	TMEM126A
796	< 1e-07	< 1e-07	0.178571	98.86	544.87	0.18	ILMN_2395856	TMEM218
797	< 1e-07	< 1e-07	0.178571	100.95	606.57	0.17	ILMN_3306997	METTL1
798	< 1e-07	< 1e-07	0.178571	98.37	1125.83	0.087	ILMN_2308849	MYADM
799	< 1e-07	< 1e-07	0.178571	90.38	727.93	0.12	ILMN_1785356	DENND5A
800	< 1e-07	< 1e-07	0.178571	86.01	373.87	0.23	ILMN_1807016	LHX2
801	< 1e-07	< 1e-07	0.178571	99.97	490.38	0.2	ILMN_1727332	ATPIF1
802	< 1e-07	< 1e-07	0.178571	1400.28	124.43	11.25	ILMN_1664118	LOC643665
803	< 1e-07	< 1e-07	0.178571	90.98	762.15	0.12	ILMN_1808405	HLA-DQA1
804	< 1e-07	< 1e-07	0.178571	4137.47	200.81	20.6	ILMN_1694799	PIAS2
805	< 1e-07	< 1e-07	0.178571	91.33	1476.57	0.062	ILMN_1719316	TMED3
806	< 1e-07	< 1e-07	0.178571	1398.84	129.62	10.79	ILMN_2231911	AUH
807	< 1e-07	< 1e-07	0.178571	102.31	4182.31	0.024	ILMN_3251472	TOMM20
808	< 1e-07	< 1e-07	0.178571	92.75	708.38	0.13	ILMN_1732923	SIPA1L2
809	< 1e-07	< 1e-07	0.178571	88.56	1383.56	0.064	ILMN_1798728	C19orf2
810	< 1e-07	< 1e-07	0.178571	90.12	1481.49	0.061	ILMN_1783695	EPRS
811	< 1e-07	< 1e-07	0.178571	90.76	1392.96	0.065	ILMN_2351638	BEX4
812	< 1e-07	< 1e-07	0.178571	114.21	5272.79	0.022	ILMN_1763404	LOC653226
813	< 1e-07	< 1e-07	0.178571	87.77	472.88	0.19	ILMN_1681590	LARP1
814	< 1e-07	< 1e-07	0.178571	88.66	1057.26	0.084	ILMN_1753002	RAB2B
815	< 1e-07	< 1e-07	0.178571	92.01	597.73	0.15	ILMN_1716583	NME7
816	< 1e-07	< 1e-07	0.178571	92.25	784.56	0.12	ILMN_1756352	MAPBPIP
817	< 1e-07	< 1e-07	0.178571	90.72	435.95	0.21	ILMN_1716053	AK2
818	< 1e-07	< 1e-07	0.178571	98.4	209.74	0.47	ILMN_1742935	ZNF33B
819	< 1e-07	< 1e-07	0.178571	92.81	427.53	0.22	ILMN_1721704	FNTA
820	< 1e-07	< 1e-07	0.178571	103.9	932.71	0.11	ILMN_2345872	SUMF2
821	< 1e-07	< 1e-07	0.178571	4946.88	503.22	9.83	ILMN_2357770	TCEA1
822	< 1e-07	< 1e-07	0.178571	96.47	2047.54	0.047	ILMN_2354381	PON2
823	< 1e-07	< 1e-07	0.178571	101.67	1520.31	0.067	ILMN_1674874	MFSD10
824	< 1e-07	< 1e-07	0.178571	88.85	534.48	0.17	ILMN_2126344	SEC16A
825	< 1e-07	< 1e-07	0.178571	89.85	569.06	0.16	ILMN_1797342	FNBP1
826	< 1e-07	< 1e-07	0.178571	103.75	1063.87	0.098	ILMN_3251545	CHMP5
827	< 1e-07	< 1e-07	0.178571	93.37	315.68	0.3	ILMN_2054019	ISG15
828	< 1e-07	< 1e-07	0.178571	110.96	801.86	0.14	ILMN_1735461	DDX21
829	< 1e-07	< 1e-07	0.178571	91.02	1030.08	0.088	ILMN_1738369	TUFM
830	< 1e-07	< 1e-07	0.178571	89.14	261.07	0.34	ILMN_1695246	KLHDC8B
831	< 1e-07	< 1e-07	0.178571	3440.67	175.41	19.61	ILMN_1655311	LOC145853
832	< 1e-07	< 1e-07	0.178571	90.67	564.76	0.16	ILMN_1791912	SIDT2
833	< 1e-07	< 1e-07	0.178571	85.69	1116.75	0.077	ILMN_1668721	CCND3
834	< 1e-07	< 1e-07	0.178571	1736.92	107.92	16.09	ILMN_1803590	ZFC3H1
835	< 1e-07	< 1e-07	0.178571	86.74	423.74	0.2	ILMN_2300396	COMMD5
836	< 1e-07	< 1e-07	0.178571	107.79	329.22	0.33	ILMN_3240177	LLPH
837	< 1e-07	< 1e-07	0.178571	111.27	3495.75	0.032	ILMN_1693287	POMP
838	< 1e-07	< 1e-07	0.178571	105.81	870.74	0.12	ILMN_1690352	ADO
839	< 1e-07	< 1e-07	0.178571	86.34	279.02	0.31	ILMN_1704055	HSPC111
840	< 1e-07	< 1e-07	0.178571	7971.01	639.32	12.47	ILMN_1683969	FKBP1A
841	< 1e-07	< 1e-07	0.178571	86.51	907.72	0.095	ILMN_1776080	GTPBP6
842	< 1e-07	< 1e-07	0.178571	106.74	711.04	0.15	ILMN_1764043	TTL
843	< 1e-07	< 1e-07	0.178571	107.45	468.05	0.23	ILMN_1700276	C14orf100
844	< 1e-07	< 1e-07	0.178571	90.53	609.24	0.15	ILMN_1657977	MSRB2
845	< 1e-07	< 1e-07	0.178571	92	533.24	0.17	ILMN_1663954	TH1L
846	< 1e-07	< 1e-07	0.178571	3194.22	346.23	9.23	ILMN_1729112	CHPT1
847	< 1e-07	< 1e-07	0.178571	103.87	530.9	0.2	ILMN_1703697	LANCL1
848	< 1e-07	< 1e-07	0.178571	87.78	363.66	0.24	ILMN_2151056	C10orf32
849	< 1e-07	< 1e-07	0.178571	89.74	1294.01	0.069	ILMN_3244248	TMEM14D
850	< 1e-07	< 1e-07	0.178571	90.06	3711.83	0.024	ILMN_2184184	ANXA1
851	< 1e-07	< 1e-07	0.178571	4419.8	370.83	11.92	ILMN_3200717	LOC643387
852	< 1e-07	< 1e-07	0.178571	1335.87	166.76	8.01	ILMN_1781151	ARMC8
853	< 1e-07	< 1e-07	0.178571	93.07	1935.89	0.048	ILMN_1678966	SNRPF
854	< 1e-07	< 1e-07	0.178571	89.49	222.87	0.4	ILMN_1708946	VPS4A
855	< 1e-07	< 1e-07	0.178571	100	4280.4	0.023	ILMN_2394438	FAM177A1
856	< 1e-07	< 1e-07	0.178571	104.61	1608.41	0.065	ILMN_1785330	SH3BP4
857	< 1e-07	< 1e-07	0.178571	111.04	1298	0.086	ILMN_1708143	FAM127A
858	< 1e-07	< 1e-07	0.178571	91.09	422.66	0.22	ILMN_1658678	SAAL1
859	< 1e-07	< 1e-07	0.178571	104.14	332.69	0.31	ILMN_1795836	C21orf57
860	< 1e-07	< 1e-07	0.178571	113.05	9880.25	0.011	ILMN_3245559	CDK2AP1
861	< 1e-07	< 1e-07	0.178571	85.99	762.09	0.11	ILMN_1767337	SFXN5
862	< 1e-07	< 1e-07	0.178571	92.43	265.54	0.35	ILMN_1796762	CCDC102A
863	< 1e-07	< 1e-07	0.178571	91.19	1051.24	0.087	ILMN_1737988	PRNP
864	< 1e-07	< 1e-07	0.178571	85.41	571.64	0.15	ILMN_1790136	C20orf20
865	< 1e-07	< 1e-07	0.178571	94.81	1457.14	0.065	ILMN_1764380	GLTP
866	< 1e-07	< 1e-07	0.178571	90.37	689.39	0.13	ILMN_1661485	RBM34
867	< 1e-07	< 1e-07	0.178571	90.51	325.48	0.28	ILMN_2158705	ACYP2
868	< 1e-07	< 1e-07	0.178571	7699.44	1040.83	7.4	ILMN_2175894	HNRPR
869	< 1e-07	< 1e-07	0.178571	96.74	430.69	0.22	ILMN_3263329	GAR1
870	< 1e-07	< 1e-07	0.178571	92.02	427.62	0.22	ILMN_1740169	TYRO3
871	< 1e-07	< 1e-07	0.178571	104.94	1616.31	0.065	ILMN_1806040	TYMS
872	< 1e-07	< 1e-07	0.178571	94.09	487.74	0.19	ILMN_2202481	UBLCP1
873	< 1e-07	< 1e-07	0.178571	103.63	1154.05	0.09	ILMN_3285153	LOC645979
874	< 1e-07	< 1e-07	0.178571	88.98	618.79	0.14	ILMN_1669508	PAF1
875	< 1e-07	< 1e-07	0.178571	84.27	680.07	0.12	ILMN_2326997	DHPS
876	< 1e-07	< 1e-07	0.178571	109.84	630.05	0.17	ILMN_2387471	FLJ22184
877	< 1e-07	< 1e-07	0.178571	90.41	1291.77	0.07	ILMN_2341067	NLGN4X
878	< 1e-07	< 1e-07	0.178571	85.07	465.38	0.18	ILMN_1697440	PRPF4
879	< 1e-07	< 1e-07	0.178571	1796.32	117.4	15.3	ILMN_1696946	LOC654174
880	< 1e-07	< 1e-07	0.178571	100.79	306.66	0.33	ILMN_3298694	TYW1B
881	< 1e-07	< 1e-07	0.178571	102.27	749.98	0.14	ILMN_3258321	LOC100130932
882	< 1e-07	< 1e-07	0.178571	93.93	1423.17	0.066	ILMN_1770732	COPS3
883	< 1e-07	< 1e-07	0.178571	94.57	1140.74	0.083	ILMN_3290353	LOC644790
884	< 1e-07	< 1e-07	0.178571	87.21	423.81	0.21	ILMN_1804642	SMUG1
885	< 1e-07	< 1e-07	0.178571	91.61	1095.84	0.084	ILMN_1772218	HLA-DPA1
886	< 1e-07	< 1e-07	0.178571	90.64	685.23	0.13	ILMN_1664016	ARHGEF18
887	< 1e-07	< 1e-07	0.178571	92.56	687.99	0.13	ILMN_1756086	INTS3
888	< 1e-07	< 1e-07	0.178571	2036.95	131.09	15.54	ILMN_1710598	SKI
889	< 1e-07	< 1e-07	0.178571	8852.79	835.23	10.6	ILMN_3199737	LOC727865
890	< 1e-07	< 1e-07	0.178571	109.93	1193.84	0.092	ILMN_1758412	COPS7A
891	< 1e-07	< 1e-07	0.178571	94.04	1515.57	0.062	ILMN_1746588	TALDO1
892	< 1e-07	< 1e-07	0.178571	90.83	304.64	0.3	ILMN_1697491	FLJ14213
893	< 1e-07	< 1e-07	0.178571	89.82	675.22	0.13	ILMN_1665510	ERRFI1
894	< 1e-07	< 1e-07	0.178571	94.33	512.51	0.18	ILMN_1677385	C8orf40
895	< 1e-07	< 1e-07	0.178571	98.2	311.43	0.32	ILMN_1753515	SRR
896	< 1e-07	< 1e-07	0.178571	90.06	672.23	0.13	ILMN_1703279	CXorf57
897	< 1e-07	< 1e-07	0.178571	101.02	773.21	0.13	ILMN_2406410	RHBDD2
898	< 1e-07	< 1e-07	0.178571	2005.27	170.85	11.74	ILMN_1733155	GIT1
899	< 1e-07	< 1e-07	0.178571	95.43	735.85	0.13	ILMN_3272500	IFI27L1
900	< 1e-07	< 1e-07	0.178571	2519.89	179.94	14	ILMN_1800952	PSMD11
901	< 1e-07	< 1e-07	0.178571	92.19	390.35	0.24	ILMN_1793203	SMCR7L
902	< 1e-07	< 1e-07	0.178571	103.39	901.23	0.11	ILMN_1772713	BMS1
903	< 1e-07	< 1e-07	0.178571	87.81	341.51	0.26	ILMN_1664922	FLNB
904	< 1e-07	< 1e-07	0.178571	124.43	6794.1	0.018	ILMN_2038776	TXN
905	< 1e-07	< 1e-07	0.178571	87.42	1150.44	0.076	ILMN_1734486	C1orf19
906	< 1e-07	< 1e-07	0.178571	98.42	1280.72	0.077	ILMN_3214532	LOC100131205
907	< 1e-07	< 1e-07	0.178571	4393.21	126.85	34.63	ILMN_3219631	LOC647081
908	< 1e-07	< 1e-07	0.178571	108.25	2860.49	0.038	ILMN_1668369	CDC37
909	< 1e-07	< 1e-07	0.178571	93.49	4146.52	0.023	ILMN_1680314	TXN
910	< 1e-07	< 1e-07	0.178571	91.52	292.03	0.31	ILMN_1702247	CCNDBP1
911	< 1e-07	< 1e-07	0.178571	93.81	714.6	0.13	ILMN_1702396	PACSIN2
912	< 1e-07	< 1e-07	0.178571	87.78	499.79	0.18	ILMN_1732089	MRI1
913	< 1e-07	< 1e-07	0.178571	90.1	551.64	0.16	ILMN_3241469	LOC100134537
914	< 1e-07	< 1e-07	0.178571	94.53	1131.84	0.084	ILMN_1685824	B4GALT5
915	< 1e-07	< 1e-07	0.178571	98.39	659.08	0.15	ILMN_1718706	ERAL1
916	< 1e-07	< 1e-07	0.178571	118.01	8145.34	0.014	ILMN_1656791	RPS6
917	< 1e-07	< 1e-07	0.178571	1429.3	142.39	10.04	ILMN_1671152	LOC649801
918	< 1e-07	< 1e-07	0.178571	7278.65	1338.52	5.44	ILMN_2166865	ENY2
919	< 1e-07	< 1e-07	0.178571	90.89	492.07	0.18	ILMN_2306565	MTX2
920	< 1e-07	< 1e-07	0.178571	92.82	467.48	0.2	ILMN_1664750	TMBIM4
921	< 1e-07	< 1e-07	0.178571	104.3	1518.96	0.069	ILMN_1671404	SVIL
922	< 1e-07	< 1e-07	0.178571	1512.1	91.95	16.45	ILMN_1812327	RNF19A
923	< 1e-07	< 1e-07	0.178571	87.33	381.69	0.23	ILMN_1787762	HEATR1
924	< 1e-07	< 1e-07	0.178571	87.38	662.81	0.13	ILMN_1738819	EFTUD2
925	< 1e-07	< 1e-07	0.178571	95.27	373.74	0.25	ILMN_2126957	NOMO1
926	< 1e-07	< 1e-07	0.178571	90.69	510.31	0.18	ILMN_2330861	SMC4
927	< 1e-07	< 1e-07	0.178571	92	350.87	0.26	ILMN_1802973	ANAPC4
928	< 1e-07	< 1e-07	0.178571	107.27	1251.07	0.086	ILMN_3242105	LOC100134073
929	< 1e-07	< 1e-07	0.178571	95.07	681.84	0.14	ILMN_1729123	PPP2R4
930	< 1e-07	< 1e-07	0.178571	88.95	676.76	0.13	ILMN_1697420	TINF2
931	< 1e-07	< 1e-07	0.178571	98.2	547.71	0.18	ILMN_2061732	YRDC
932	< 1e-07	< 1e-07	0.178571	85.63	324.07	0.26	ILMN_1766245	SUPT4H1
933	< 1e-07	< 1e-07	0.178571	84.29	844.66	0.1	ILMN_1654920	HNRPH3
934	< 1e-07	< 1e-07	0.178571	94.45	1720.01	0.055	ILMN_1750101	S100A11
935	< 1e-07	< 1e-07	0.178571	105.02	387.74	0.27	ILMN_1674302	PPAT
936	< 1e-07	< 1e-07	0.178571	86.52	614.72	0.14	ILMN_1746883	SAT2
937	< 1e-07	< 1e-07	0.178571	99.71	339.86	0.29	ILMN_1790781	DHRS13
938	< 1e-07	< 1e-07	0.178571	91.98	427.98	0.21	ILMN_1725071	CCDC12
939	< 1e-07	< 1e-07	0.178571	113.18	4052.84	0.028	ILMN_1809495	COX8A
940	< 1e-07	< 1e-07	0.178571	93.51	984.25	0.095	ILMN_1797813	SUZ12
941	< 1e-07	< 1e-07	0.178571	1728.53	108.95	15.87	ILMN_1655155	PRPS1L1
942	< 1e-07	< 1e-07	0.178571	86.11	655.2	0.13	ILMN_2098743	THEM2
943	< 1e-07	< 1e-07	0.178571	84.59	533.55	0.16	ILMN_1670807	FAM84B
944	< 1e-07	< 1e-07	0.178571	109.6	1299.47	0.084	ILMN_1742577	GTPBP4
945	< 1e-07	< 1e-07	0.178571	87.15	565.7	0.15	ILMN_1739222	ETV5
946	< 1e-07	< 1e-07	0.178571	92.73	2330.68	0.04	ILMN_1748093	PAFAH1B3
947	< 1e-07	< 1e-07	0.178571	96.1	1149.71	0.084	ILMN_1683475	TOMM40
948	< 1e-07	< 1e-07	0.178571	1586.65	106.92	14.84	ILMN_1707173	HIST3H3
949	< 1e-07	< 1e-07	0.178571	1281.81	134.31	9.54	ILMN_2173909	ZNF14
950	< 1e-07	< 1e-07	0.178571	113.63	1259.35	0.09	ILMN_1793287	LOC642755
951	< 1e-07	< 1e-07	0.178571	88.46	449.43	0.2	ILMN_1715607	CHMP4A
952	< 1e-07	< 1e-07	0.178571	97.84	563.82	0.17	ILMN_1688000	POLDIP3
953	< 1e-07	< 1e-07	0.178571	104.85	297.51	0.35	ILMN_1655635	METTL3
954	< 1e-07	< 1e-07	0.178571	92.29	370.35	0.25	ILMN_2058512	PSMA2
955	< 1e-07	< 1e-07	0.178571	92.62	765.33	0.12	ILMN_1683096	ASB1
956	< 1e-07	< 1e-07	0.178571	89.3	941.12	0.095	ILMN_1658425	DAG1
957	< 1e-07	< 1e-07	0.178571	91.32	2205.89	0.041	ILMN_2179018	NDUFAB1
958	< 1e-07	< 1e-07	0.178571	95.14	1374.06	0.069	ILMN_1729533	APOA1BP
959	< 1e-07	< 1e-07	0.178571	91.16	327.06	0.28	ILMN_1651557	KDELC2
960	< 1e-07	< 1e-07	0.178571	114.01	1007.64	0.11	ILMN_1691892	TAGLN2
961	< 1e-07	< 1e-07	0.178571	90.26	244.26	0.37	ILMN_1698019	LGMN
962	< 1e-07	< 1e-07	0.178571	5336.39	95.28	56.01	ILMN_2161955	PGK2
963	< 1e-07	< 1e-07	0.178571	101.83	1365.14	0.075	ILMN_2111187	ELOVL6
964	< 1e-07	< 1e-07	0.178571	87.34	459.59	0.19	ILMN_1676846	ABCE1
965	< 1e-07	< 1e-07	0.178571	96.07	3171.27	0.03	ILMN_1787026	SEC61G
966	< 1e-07	< 1e-07	0.178571	84.97	406.17	0.21	ILMN_1759184	C19orf48
967	< 1e-07	< 1e-07	0.178571	1427.72	106.34	13.43	ILMN_1686060	LOC729777
968	< 1e-07	< 1e-07	0.178571	97.2	488.43	0.2	ILMN_2228180	MSRA
969	< 1e-07	< 1e-07	0.178571	86.16	1063.55	0.081	ILMN_1777881	TSPAN17
970	< 1e-07	< 1e-07	0.178571	89.79	865.84	0.1	ILMN_1803348	EHBP1
971	< 1e-07	< 1e-07	0.178571	95.29	349.34	0.27	ILMN_3241979	TMEM179B
972	< 1e-07	< 1e-07	0.178571	89.77	367.54	0.24	ILMN_1716875	CTNND2
973	< 1e-07	< 1e-07	0.178571	10150	218.04	46.55	ILMN_3292244	LOC100132804
974	< 1e-07	< 1e-07	0.178571	109.27	319.34	0.34	ILMN_1789171	EEF2K
975	1e-07	1.25e-06	0.178571	84.52	781.37	0.11	ILMN_2188264	CYR61
976	1e-07	1.25e-06	0.178571	90.35	577.91	0.16	ILMN_1703471	ATF6
977	1e-07	1.25e-06	0.178571	111.47	7055.94	0.016	ILMN_3272996	LOC100129141
978	1e-07	1.25e-06	0.178571	87.52	504.11	0.17	ILMN_2054392	PPIL1
979	1e-07	1.25e-06	0.178571	91.38	1054.27	0.087	ILMN_1806908	PRKCB1
980	1e-07	1.25e-06	0.178571	90.11	291.12	0.31	ILMN_1665066	C4orf14
981	1e-07	1.25e-06	0.178571	104.95	1239.84	0.085	ILMN_1753582	RPA2
982	1e-07	1.25e-06	0.178571	87.58	637.34	0.14	ILMN_1709772	SNX5
983	1e-07	1.25e-06	0.178571	89.88	622.06	0.14	ILMN_1691188	UIMC1
984	1e-07	1.25e-06	0.178571	90.07	990	0.091	ILMN_2189027	LIPG
985	1e-07	1.25e-06	0.178571	97.23	581.8	0.17	ILMN_2105308	DPM1
986	1e-07	1.25e-06	0.178571	89.25	422.33	0.21	ILMN_1803811	TRIB1
987	1e-07	1.25e-06	0.178571	94.26	553.27	0.17	ILMN_1807044	UBAC1
988	1e-07	1.25e-06	0.178571	91.95	215.63	0.43	ILMN_3278132	LOC440487
989	1e-07	1.25e-06	0.178571	87.3	181.91	0.48	ILMN_1789909	TBC1D9B
990	1e-07	1.25e-06	0.178571	91.32	695.05	0.13	ILMN_1665559	CDK2
991	1e-07	1.25e-06	0.178571	91.99	221.93	0.41	ILMN_1733932	SNUPN
992	1e-07	1.25e-06	0.178571	91.07	1231.43	0.074	ILMN_1715994	HGS
993	1e-07	1.25e-06	0.178571	92.5	439.92	0.21	ILMN_2347349	CCNB1IP1
994	1e-07	1.25e-06	0.178571	91.67	306.19	0.3	ILMN_1788095	SPRYD3
995	1e-07	1.25e-06	0.178571	94.71	297.57	0.32	ILMN_2392356	CTPS2
996	1e-07	1.25e-06	0.178571	88.07	1461.87	0.06	ILMN_2156267	EIF2AK1
997	1e-07	1.25e-06	0.178571	84.66	477.94	0.18	ILMN_1797522	DUSP3
998	1e-07	1.25e-06	0.178571	94.78	332.88	0.28	ILMN_3307892	PARVA
999	1e-07	1.25e-06	0.178571	105.59	712.54	0.15	ILMN_1706873	RPL34
1000	1e-07	1.25e-06	0.178571	1586.61	111.41	14.24	ILMN_1740088	LOC647920
1001	1e-07	1.25e-06	0.178571	94.31	1158.39	0.081	ILMN_1682264	DCAF7
1002	1e-07	1.25e-06	0.178571	803.01	119.26	6.73	ILMN_1718971	TTC7B
1003	1e-07	1.25e-06	0.178571	94.31	968.91	0.097	ILMN_1711270	SFRS14
1004	1e-07	1.25e-06	0.178571	93.47	359.53	0.26	ILMN_1686748	TMEM9
1005	1e-07	1.25e-06	0.178571	1776.49	153.84	11.55	ILMN_2362902	RASSF5
1006	1e-07	1.25e-06	0.178571	89.28	1251.55	0.071	ILMN_2311166	ITGB5
1007	1e-07	1.25e-06	0.178571	90.26	430.1	0.21	ILMN_1807596	UBAP1
1008	1e-07	1.25e-06	0.178571	92.07	613.27	0.15	ILMN_2103720	MRPL15
1009	1e-07	1.25e-06	0.178571	92.99	368.41	0.25	ILMN_2155172	BRIX1
1010	1e-07	1.25e-06	0.178571	85.19	355.89	0.24	ILMN_2129388	FAM190B
1011	1e-07	1.25e-06	0.178571	90.08	1398.64	0.064	ILMN_1731640	MGC39900
1012	1e-07	1.25e-06	0.178571	1587.47	157.44	10.08	ILMN_1669259	ANKRD49
1013	1e-07	1.25e-06	0.178571	95.69	681.76	0.14	ILMN_1811238	ALPK2
1014	1e-07	1.25e-06	0.178571	92.81	468.56	0.2	ILMN_1659936	PPP1R15A
1015	1e-07	1.25e-06	0.178571	89.41	204.75	0.44	ILMN_2136177	CNOT6
1016	1e-07	1.25e-06	0.178571	83.76	832.06	0.1	ILMN_1794470	ANKFY1
1017	1e-07	1.25e-06	0.178571	1292.34	20573	0.063	ILMN_1792528	LOC401206
1018	1e-07	1.25e-06	0.178571	95.23	2165.52	0.044	ILMN_1780058	DEGS1
1019	1e-07	1.25e-06	0.178571	85.07	1246.49	0.068	ILMN_1739946	VKORC1
1020	1e-07	1.25e-06	0.178571	94.84	3992.34	0.024	ILMN_1748546	2011-09-02
1021	1e-07	1.25e-06	0.178571	86.05	987.2	0.087	ILMN_1692651	PHB
1022	1e-07	1.25e-06	0.178571	87.47	2343.15	0.037	ILMN_2380698	DSTN
1023	1e-07	1.25e-06	0.178571	95.16	932.42	0.1	ILMN_1740351	KIAA0174
1024	1e-07	1.25e-06	0.178571	96.46	564.31	0.17	ILMN_1761120	TM2D3
1025	1e-07	1.25e-06	0.178571	96.33	633.21	0.15	ILMN_2056167	OSTC
1026	1e-07	1.25e-06	0.178571	92.59	465.34	0.2	ILMN_1673962	NUP205
1027	1e-07	1.25e-06	0.178571	88.52	404.01	0.22	ILMN_2194649	TADA1L
1028	1e-07	1.25e-06	0.178571	7123.38	415.03	17.16	ILMN_1699603	MRPL12
1029	1e-07	1.25e-06	0.178571	108.55	2801.55	0.039	ILMN_1737862	PSMB4
1030	1e-07	1.25e-06	0.178571	1797.25	115.92	15.5	ILMN_3240626	LOC100134424
1031	1e-07	1.25e-06	0.178571	93.22	275.52	0.34	ILMN_1736481	SECISBP2
1032	1e-07	1.25e-06	0.178571	92.89	246.47	0.38	ILMN_1807304	MBNL1
1033	1e-07	1.25e-06	0.178571	95.24	439.33	0.22	ILMN_1668090	STK25
1034	1e-07	1.25e-06	0.178571	93.81	666.87	0.14	ILMN_1680129	NSUN2
1035	1e-07	1.25e-06	0.178571	115.07	3807.98	0.03	ILMN_1803846	EIF1
1036	1e-07	1.25e-06	0.178571	1439.23	225.51	6.38	ILMN_1653367	TAF12
1037	1e-07	1.25e-06	0.178571	90.01	574.15	0.16	ILMN_1769299	MTMR11
1038	1e-07	1.25e-06	0.178571	88.96	343.63	0.26	ILMN_1673023	EP400
1039	1e-07	1.25e-06	0.178571	100.63	1537.51	0.065	ILMN_1684391	PLOD1
1040	1e-07	1.25e-06	0.178571	91.16	265.81	0.34	ILMN_1737857	GTF2B
1041	1e-07	1.25e-06	0.178571	1378.44	135.39	10.18	ILMN_1803597	FGL1
1042	1e-07	1.25e-06	0.178571	97.29	374.02	0.26	ILMN_1773247	ZNF410
1043	1e-07	1.25e-06	0.178571	97.94	364.79	0.27	ILMN_2233366	ASAP1
1044	1e-07	1.25e-06	0.178571	94.11	1033.39	0.091	ILMN_1676563	HTRA1
1045	1e-07	1.25e-06	0.178571	7042.1	104.75	67.23	ILMN_1695949	SIGLEC12
1046	1e-07	1.25e-06	0.178571	91.7	1120.44	0.082	ILMN_1777663	TOP2B
1047	1e-07	1.25e-06	0.178571	91.9	542.2	0.17	ILMN_1765796	ENO2
1048	1e-07	1.25e-06	0.178571	95.8	705.49	0.14	ILMN_1772731	HAGH
1049	1e-07	1.25e-06	0.178571	95.5	414.4	0.23	ILMN_1656560	PARM1
1050	1e-07	1.25e-06	0.178571	98.1	1237.08	0.079	ILMN_1675797	EPDR1
1051	1e-07	1.25e-06	0.178571	97.94	593.85	0.16	ILMN_1721657	RSU1
1052	1e-07	1.25e-06	0.178571	4331.09	420.7	10.29	ILMN_1705093	ORC5L
1053	1e-07	1.25e-06	0.178571	94.25	384.28	0.25	ILMN_1804448	MSI2
1054	1e-07	1.25e-06	0.178571	92.15	1109.9	0.083	ILMN_1698732	PALLD
1055	1e-07	1.25e-06	0.178571	91.12	381.01	0.24	ILMN_1785179	UBE2G2
1056	1e-07	1.25e-06	0.178571	106.44	2364.14	0.045	ILMN_1784523	ATP6V1G1
1057	1e-07	1.25e-06	0.178571	1567.08	180.22	8.7	ILMN_1657478	MAGEL2
1058	1e-07	1.25e-06	0.178571	95.11	427.42	0.22	ILMN_2336186	LCMT1
1059	1e-07	1.25e-06	0.178571	99.67	1365.6	0.073	ILMN_2218208	SPARCL1
1060	1e-07	1.25e-06	0.178571	95.61	472.28	0.2	ILMN_2325234	PQBP1
1061	1e-07	1.25e-06	0.178571	4445.7	202.22	21.98	ILMN_3224934	SFRS18
1062	1e-07	1.25e-06	0.178571	91.55	363.75	0.25	ILMN_1680130	DYM
1063	1e-07	1.25e-06	0.178571	91.22	402.57	0.23	ILMN_1791388	ZNF787
1064	1e-07	1.25e-06	0.178571	90.95	489.69	0.19	ILMN_1781906	RBM17
1065	1e-07	1.25e-06	0.178571	4379.57	257.22	17.03	ILMN_1800308	GTF2H4
1066	1e-07	1.25e-06	0.178571	90.53	243.41	0.37	ILMN_1683415	CAMK2D
1067	1e-07	1.25e-06	0.178571	94.53	1440.51	0.066	ILMN_1722102	ANAPC11
1068	1e-07	1.25e-06	0.178571	97.4	1152.93	0.084	ILMN_2352563	CLDND1
1069	1e-07	1.25e-06	0.178571	88.76	1415.49	0.063	ILMN_1809590	GINS2
1070	1e-07	1.25e-06	0.178571	94.85	1666.06	0.057	ILMN_1679209	HSPA9
1071	1e-07	1.25e-06	0.178571	99	497.09	0.2	ILMN_1652521	MTMR9
1072	1e-07	1.25e-06	0.178571	93.26	22457.3	0.0042	ILMN_2038777	ACTB
1073	1e-07	1.25e-06	0.178571	89.81	1055.76	0.085	ILMN_1681737	TMSB15A
1074	1e-07	1.25e-06	0.178571	2763.19	126.78	21.79	ILMN_3227250	LOC729941
1075	1e-07	1.25e-06	0.178571	88.39	964.17	0.092	ILMN_1768534	BHLHB2
1076	1e-07	1.25e-06	0.178571	1832.74	140.57	13.04	ILMN_1770865	TRIM46
1077	1e-07	1.25e-06	0.178571	88.75	563.07	0.16	ILMN_2197946	SCG3
1078	1e-07	1.25e-06	0.178571	103.65	336.97	0.31	ILMN_2068747	OAT
1079	1e-07	1.25e-06	0.178571	98.1	390.14	0.25	ILMN_1763265	CHMP1B
1080	1e-07	1.25e-06	0.178571	88.63	419.7	0.21	ILMN_1655990	CDK5RAP2
1081	1e-07	1.25e-06	0.178571	99.19	359.88	0.28	ILMN_1773741	GOLGA5
1082	1e-07	1.25e-06	0.178571	94.46	1239.84	0.076	ILMN_1703477	ARHGEF2
1083	1e-07	1.25e-06	0.178571	87.38	945.02	0.092	ILMN_1714067	NTRK2
1084	1e-07	1.25e-06	0.178571	100.06	923.94	0.11	ILMN_1720344	NIPA2
1085	1e-07	1.25e-06	0.178571	92.59	496.34	0.19	ILMN_1759023	WFS1
1086	1e-07	1.25e-06	0.178571	104.21	5496.99	0.019	ILMN_3272378	EZR
1087	1e-07	1.25e-06	0.178571	90.51	692.83	0.13	ILMN_1788778	2011-09-11
1088	1e-07	1.25e-06	0.178571	87.54	274.23	0.32	ILMN_2215631	OTUD6B
1089	1e-07	1.25e-06	0.178571	111.46	15484.2	0.0072	ILMN_3279277	LOC387930
1090	1e-07	1.25e-06	0.178571	101.25	721.96	0.14	ILMN_2072091	HNRNPUL2
1091	1e-07	1.25e-06	0.178571	90.8	6516.62	0.014	ILMN_1764721	RPL8
1092	1e-07	1.25e-06	0.178571	94.86	892.65	0.11	ILMN_1727458	HDAC1
1093	1e-07	1.25e-06	0.178571	87.56	2783.84	0.031	ILMN_2384122	GPR56
1094	1e-07	1.25e-06	0.178571	91.83	317.67	0.29	ILMN_1709486	SRPX
1095	1e-07	1.25e-06	0.178571	88.1	424.37	0.21	ILMN_1748926	TMEM209
1096	1e-07	1.25e-06	0.178571	98.63	1240.87	0.079	ILMN_1806601	GRSF1
1097	1e-07	1.25e-06	0.178571	90.23	341.73	0.26	ILMN_1783728	TBRG4
1098	1e-07	1.25e-06	0.178571	96.24	898.44	0.11	ILMN_1761010	PCCB
1099	1e-07	1.25e-06	0.178571	89.55	453.65	0.2	ILMN_1651799	SLC38A2
1100	1e-07	1.25e-06	0.178571	2044.89	102.37	19.98	ILMN_1656761	TGIF1
1101	1e-07	1.25e-06	0.178571	93.37	1122.96	0.083	ILMN_1690268	HNRPUL1
1102	1e-07	1.25e-06	0.178571	1533.93	269.47	5.69	ILMN_3284177	LOC100132425
1103	1e-07	1.25e-06	0.178571	100.11	1180.53	0.085	ILMN_1653028	COL4A1
1104	1e-07	1.25e-06	0.178571	89.39	613.96	0.15	ILMN_1679134	NSMCE4A
1105	1e-07	1.25e-06	0.178571	92.76	854.52	0.11	ILMN_1677138	POLR2J3
1106	1e-07	1.25e-06	0.178571	3912.58	240.79	16.25	ILMN_1737344	DDX41
1107	1e-07	1.25e-06	0.178571	1975.22	150.97	13.08	ILMN_1729832	LOC653994
1108	1e-07	1.25e-06	0.178571	101.76	495.65	0.21	ILMN_1746704	TRIM8
1109	1e-07	1.25e-06	0.178571	100.5	1818.36	0.055	ILMN_1716678	NPC2
1110	1e-07	1.25e-06	0.178571	87.89	305.63	0.29	ILMN_1683576	MAGED2
1111	1e-07	1.25e-06	0.178571	3598.91	242.66	14.83	ILMN_1765060	FBXO34
1112	1e-07	1.25e-06	0.178571	90.25	199.75	0.45	ILMN_2179397	TATDN1
1113	1e-07	1.25e-06	0.178571	101.25	1661.86	0.061	ILMN_1774823	RPL34
1114	1e-07	1.25e-06	0.178571	108.47	2010.64	0.054	ILMN_1697469	SFRS6
1115	1e-07	1.25e-06	0.178571	86.06	230.86	0.37	ILMN_1690546	PPP3CC
1116	1e-07	1.25e-06	0.178571	87.7	511.86	0.17	ILMN_1761844	ZCCHC17
1117	1e-07	1.25e-06	0.178571	85.5	500.16	0.17	ILMN_2082810	BRD7
1118	1e-07	1.25e-06	0.178571	3158.65	265	11.92	ILMN_1791097	RSBN1
1119	1e-07	1.25e-06	0.178571	3635.57	386.74	9.4	ILMN_1727073	MEA1
1120	1e-07	1.25e-06	0.178571	92.32	347.17	0.27	ILMN_2332990	DIABLO
1121	1e-07	1.25e-06	0.178571	96.06	491.1	0.2	ILMN_2214603	PPP2R3C
1122	1e-07	1.25e-06	0.178571	5438.34	363.17	14.97	ILMN_2103761	TLE4
1123	1e-07	1.25e-06	0.178571	97.34	2631.34	0.037	ILMN_1740819	STARD7
1124	1e-07	1.25e-06	0.178571	106.05	915.7	0.12	ILMN_1724544	PPP4R1
1125	1e-07	1.25e-06	0.178571	99.7	1446.01	0.069	ILMN_1793651	UBE2N
1126	1e-07	1.25e-06	0.178571	103.05	840.12	0.12	ILMN_2121282	MRPS18B
1127	1e-07	1.25e-06	0.178571	92.64	1156.27	0.08	ILMN_2401906	CDAN1
1128	1e-07	1.25e-06	0.178571	2439.35	168.44	14.48	ILMN_1700811	UBFD1
1129	1e-07	1.25e-06	0.178571	100.24	570.57	0.18	ILMN_2352131	ERBB2
1130	1e-07	1.25e-06	0.178571	94.04	1848.11	0.051	ILMN_1743432	DGUOK
1131	1e-07	1.25e-06	0.178571	89.49	1365.82	0.066	ILMN_1794165	PGD
1132	1e-07	1.25e-06	0.178571	9303.98	932.91	9.97	ILMN_1655316	PSMC6
1133	1e-07	1.25e-06	0.178571	9388.37	627.07	14.97	ILMN_1704385	LOC347376
1134	1e-07	1.25e-06	0.178571	94.95	720.98	0.13	ILMN_2096191	AASDHPPT
1135	1e-07	1.25e-06	0.178571	112.22	1380.92	0.081	ILMN_2186597	RPP21
1136	1e-07	1.25e-06	0.178571	98.82	741.43	0.13	ILMN_1814369	C21orf62
1137	1e-07	1.25e-06	0.178571	97.23	274.44	0.35	ILMN_2249288	TIPRL
1138	1e-07	1.25e-06	0.178571	1582.15	116.69	13.56	ILMN_1726928	TCEA3
1139	1e-07	1.25e-06	0.178571	104.05	359.98	0.29	ILMN_1717765	NUDT11
1140	1e-07	1.25e-06	0.178571	90.54	567.52	0.16	ILMN_1745079	TRIM2
1141	1e-07	1.25e-06	0.178571	92.23	577.56	0.16	ILMN_1812926	ANTXR2
1142	1e-07	1.25e-06	0.178571	91.06	605.32	0.15	ILMN_1669206	CNOT1
1143	1e-07	1.25e-06	0.178571	113.39	22849.8	0.005	ILMN_2053178	ACTG1
1144	1e-07	1.25e-06	0.178571	87.56	294.48	0.3	ILMN_1731137	TXNDC9
1145	1e-07	1.25e-06	0.178571	102.38	769.89	0.13	ILMN_1651405	BRD9
1146	1e-07	1.25e-06	0.178571	91.34	372.6	0.25	ILMN_1724293	KDELR2
1147	1e-07	1.25e-06	0.178571	97.38	797.38	0.12	ILMN_1735955	LOC644033
1148	1e-07	1.25e-06	0.178571	92.53	2403.32	0.038	ILMN_1660577	ATP5G2
1149	1e-07	1.25e-06	0.178571	3695.74	259.84	14.22	ILMN_1785324	MTHFD1
1150	1e-07	1.25e-06	0.178571	91.81	663.97	0.14	ILMN_1752802	CLPTM1L
1151	1e-07	1.25e-06	0.178571	2371.59	113.45	20.9	ILMN_2361163	SSBP3
1152	1e-07	1.25e-06	0.178571	90.71	291.65	0.31	ILMN_2362457	ZDHHC16
1153	1e-07	1.25e-06	0.178571	90.95	281.58	0.32	ILMN_1672042	DOLPP1
1154	1e-07	1.25e-06	0.178571	129.21	2143.92	0.06	ILMN_1725642	SUMO3
1155	1e-07	1.25e-06	0.178571	92.2	2961.35	0.031	ILMN_2412521	KIAA0101
1156	1e-07	1.25e-06	0.178571	95.23	507.82	0.19	ILMN_2356031	RNF121
1157	1e-07	1.25e-06	0.178571	89.37	832.1	0.11	ILMN_1765459	S100A13
1158	1e-07	1.25e-06	0.178571	96.36	246.88	0.39	ILMN_1670925	CYB5D1
1159	1e-07	1.25e-06	0.178571	102.55	2403	0.043	ILMN_1740180	SNX3
1160	1e-07	1.25e-06	0.178571	12791.1	3197.89	4	ILMN_1672496	DNAJA1
1161	1e-07	1.25e-06	0.178571	101.08	858.97	0.12	ILMN_1760933	RER1
1162	1e-07	1.25e-06	0.178571	91.67	2989.9	0.031	ILMN_1685088	RPL36
1163	1e-07	1.25e-06	0.178571	1786.67	161.74	11.05	ILMN_1713402	FAM160A2
1164	1e-07	1.25e-06	0.178571	2788.44	235.35	11.85	ILMN_1736510	FOXN2
1165	1e-07	1.25e-06	0.178571	92.85	427.2	0.22	ILMN_1714167	CYB5A
1166	1e-07	1.25e-06	0.178571	90.58	3354.65	0.027	ILMN_1778668	TAGLN
1167	1e-07	1.25e-06	0.178571	102.29	2742.3	0.037	ILMN_1660021	M6PRBP1
1168	1e-07	1.25e-06	0.178571	1385.26	136.89	10.12	ILMN_1774086	CBX3
1169	1e-07	1.25e-06	0.178571	92.62	1132.89	0.082	ILMN_1778457	IL18
1170	1e-07	1.25e-06	0.178571	85.75	491.99	0.17	ILMN_1748650	MRPL45
1171	1e-07	1.25e-06	0.178571	1317.07	188.5	6.99	ILMN_1814985	PDLIM7
1172	1e-07	1.25e-06	0.178571	99.95	615.79	0.16	ILMN_2377240	AKTIP
1173	1e-07	1.25e-06	0.178571	87.32	502.59	0.17	ILMN_2396648	EXOSC1
1174	1e-07	1.25e-06	0.178571	112.85	3021.1	0.037	ILMN_3251341	TUBA1C
1175	1e-07	1.25e-06	0.178571	89.42	885.64	0.1	ILMN_1729117	COL5A2
1176	1e-07	1.25e-06	0.178571	2628.44	162.99	16.13	ILMN_1683811	TNPO3
1177	1e-07	1.25e-06	0.178571	101.58	484.46	0.21	ILMN_2334350	BTBD3
1178	1e-07	1.25e-06	0.178571	98.8	1188.91	0.083	ILMN_1709307	GPSM1
1179	1e-07	1.25e-06	0.178571	91.55	2256.94	0.041	ILMN_1652631	GLIPR2
1180	1e-07	1.25e-06	0.178571	10176	806.67	12.61	ILMN_1750079	PURB
1181	1e-07	1.25e-06	0.178571	105.83	451.54	0.23	ILMN_1763540	PSME4
1182	1e-07	1.25e-06	0.178571	99.05	322.82	0.31	ILMN_1761247	PIR
1183	1e-07	1.25e-06	0.178571	92.03	534.28	0.17	ILMN_1769671	RYK
1184	1e-07	1.25e-06	0.178571	94.31	2392.5	0.039	ILMN_1660732	PPP2R2B
1185	1e-07	1.25e-06	0.178571	114.27	1138.12	0.1	ILMN_2318568	HCFC1R1
1186	1e-07	1.25e-06	0.178571	97.21	868.64	0.11	ILMN_1729453	TSPAN9
1187	1e-07	1.25e-06	0.178571	1560.65	153	10.2	ILMN_1803995	TM7SF3
1188	1e-07	1.25e-06	0.178571	1676.15	97.23	17.24	ILMN_1756849	HIST1H2AE
1189	1e-07	1.25e-06	0.178571	90.57	328.96	0.28	ILMN_1798957	C12orf47
1190	1e-07	1.25e-06	0.178571	94.65	724.68	0.13	ILMN_1807211	NICN1
1191	1e-07	1.25e-06	0.178571	86.95	466.5	0.19	ILMN_1745994	GAS7
1192	1e-07	1.25e-06	0.178571	84.47	821.63	0.1	ILMN_1782579	IMMT
1193	1e-07	1.25e-06	0.178571	90.07	672.85	0.13	ILMN_1724907	NUDT3
1194	1e-07	1.25e-06	0.178571	1073.03	122.99	8.72	ILMN_3241729	EMX2OS
1195	1e-07	1.25e-06	0.178571	98.02	434.7	0.23	ILMN_1786697	TRIM9
1196	1e-07	1.25e-06	0.178571	105.01	872.9	0.12	ILMN_1653794	C6orf160
1197	1e-07	1.25e-06	0.178571	120.58	2158.4	0.056	ILMN_2198376	PSMA4
1198	1e-07	1.25e-06	0.178571	2576.37	123.65	20.84	ILMN_2374244	DYRK2
1199	1e-07	1.25e-06	0.178571	94.75	658.11	0.14	ILMN_1745954	CORO1C
1200	1e-07	1.25e-06	0.178571	83.75	563.47	0.15	ILMN_1715569	CCDC53
1201	1e-07	1.25e-06	0.178571	95.41	466.31	0.2	ILMN_1665004	CASC3
1202	1e-07	1.25e-06	0.178571	90.43	635.35	0.14	ILMN_3243961	ZNF252
1203	1e-07	1.25e-06	0.178571	93.77	875.97	0.11	ILMN_1773389	PLTP
1204	1e-07	1.25e-06	0.178571	88.93	356.82	0.25	ILMN_1800164	PPFIA1
1205	1e-07	1.25e-06	0.178571	89.24	264.4	0.34	ILMN_2407434	DCLK2
1206	1e-07	1.25e-06	0.178571	91.32	427.18	0.21	ILMN_1784661	TMEM2
1207	1e-07	1.25e-06	0.178571	96.72	905.4	0.11	ILMN_2407082	2011-09-15
1208	1e-07	1.25e-06	0.178571	88.31	809.76	0.11	ILMN_1805737	PFKP
1209	1e-07	1.25e-06	0.178571	96.41	449.25	0.21	ILMN_3304555	LOC728324
1210	1e-07	1.25e-06	0.178571	107.24	1590.99	0.067	ILMN_1795876	GPS1
1211	1e-07	1.25e-06	0.178571	94.7	502.83	0.19	ILMN_1730568	ZDHHC7
1212	1e-07	1.25e-06	0.178571	105.81	967.3	0.11	ILMN_1708906	C2orf29
1213	1e-07	1.25e-06	0.178571	100.22	506.27	0.2	ILMN_1792138	UQCRH
1214	1e-07	1.25e-06	0.178571	87.28	599.99	0.15	ILMN_1655163	STK24
1215	1e-07	1.25e-06	0.178571	1152.65	126.96	9.08	ILMN_1735792	RHBDF2
1216	1e-07	1.25e-06	0.178571	7399.03	834.18	8.87	ILMN_1880406
1217	1e-07	1.25e-06	0.178571	1308.11	132.02	9.91	ILMN_3243606	C14orf174
1218	1e-07	1.25e-06	0.178571	105.79	4729.52	0.022	ILMN_1789005	ATP6V0C
1219	1e-07	1.25e-06	0.178571	88.35	538.74	0.16	ILMN_2346573	PSME3
1220	1e-07	1.25e-06	0.178571	83.93	638.66	0.13	ILMN_1768582	PPP2CB
1221	1e-07	1.25e-06	0.178571	101.63	650.9	0.16	ILMN_1708147	TBPL1
1222	1e-07	1.25e-06	0.178571	3461.65	412.4	8.39	ILMN_1762115	CRYZL1
1223	1e-07	1.25e-06	0.178571	89	534.36	0.17	ILMN_1736234	C1orf77
1224	1e-07	1.25e-06	0.178571	92.99	688.29	0.14	ILMN_2388155	CASP3
1225	1e-07	1.25e-06	0.178571	94.04	630.33	0.15	ILMN_2285817	FAM89A
1226	1e-07	1.25e-06	0.178571	120.97	2539.96	0.048	ILMN_1679555	TIMM23
1227	1e-07	1.25e-06	0.178571	95.48	592.35	0.16	ILMN_2318011	PSMA3
1228	1e-07	1.25e-06	0.178571	1161.19	197.46	5.88	ILMN_1680693	ZNF419
1229	1e-07	1.25e-06	0.178571	92.28	191.76	0.48	ILMN_1811702	GRN
1230	1e-07	1.25e-06	0.178571	93.07	242.62	0.38	ILMN_2360307	SUSD4
1231	1e-07	1.25e-06	0.178571	90.49	189	0.48	ILMN_2214197	TP53INP1
1232	1e-07	1.25e-06	0.178571	96.39	1050.71	0.092	ILMN_2410540	CASP2
1233	1e-07	1.25e-06	0.178571	93.63	357.78	0.26	ILMN_1815346	TMEM136
1234	1e-07	1.25e-06	0.178571	97.67	1635.01	0.06	ILMN_2100815	TMEM9B
1235	1e-07	1.25e-06	0.178571	90.65	536.14	0.17	ILMN_2373779	COPS8
1236	1e-07	1.25e-06	0.178571	91.14	341.41	0.27	ILMN_2135339	C3orf70
1237	1e-07	1.25e-06	0.178571	9432.02	424.37	22.23	ILMN_2365549	BRPF1
1238	1e-07	1.25e-06	0.178571	95.08	585.99	0.16	ILMN_2077905	PTGFRN
1239	1e-07	1.25e-06	0.178571	82.75	656.52	0.13	ILMN_1768176	CXorf26
1240	1e-07	1.25e-06	0.178571	90.23	1862.49	0.048	ILMN_1760849	NETO2
1241	1e-07	1.25e-06	0.178571	90.64	421.18	0.22	ILMN_1797277	KIF3C
1242	1e-07	1.25e-06	0.178571	90.23	607.5	0.15	ILMN_2176768	SEPHS1
1243	1e-07	1.25e-06	0.178571	2323.59	151.05	15.38	ILMN_1722409	LOC644816
1244	1e-07	1.25e-06	0.178571	87.37	483.79	0.18	ILMN_2316540	MRPL11
1245	1e-07	1.25e-06	0.178571	101.24	1121.26	0.09	ILMN_2116714	SLC39A1
1246	1e-07	1.25e-06	0.178571	1970.66	171.21	11.51	ILMN_2150258	ZFP36L2
1247	1e-07	1.25e-06	0.178571	102.81	678.1	0.15	ILMN_1712888	HSPH1
1248	1e-07	1.25e-06	0.178571	89.3	1524.68	0.059	ILMN_2397484	GJC1
1249	1e-07	1.25e-06	0.178571	95.91	447.95	0.21	ILMN_2057573	FAM62B
1250	1e-07	1.25e-06	0.178571	90.01	332.98	0.27	ILMN_2396410	CS

## Sheet: high in OBNSC
	Parametric p-value	FDR	Permutation p-value	Geom mean of intensities in class 1	Geom mean of intensities in class 2	Fold-change	UniqueID	Symbol
56	< 1e-07	< 1e-07	0.178571	20083.7	119.59	167.93	ILMN_3267451	GAPDHL6
84	< 1e-07	< 1e-07	0.178571	14970	116.23	128.8	ILMN_3240354	CYCSP52
406	< 1e-07	< 1e-07	0.178571	14193.2	117.23	121.07	ILMN_1782611	LOC643870
299	< 1e-07	< 1e-07	0.178571	8510.87	107.54	79.14	ILMN_2342695	PDGFA
1045	1e-07	1.25e-06	0.178571	7042.1	104.75	67.23	ILMN_1695949	SIGLEC12
52	< 1e-07	< 1e-07	0.178571	6882.19	106	64.93	ILMN_1770854	LOC391124
440	< 1e-07	< 1e-07	0.178571	5472.01	88.84	61.6	ILMN_1780460	C9orf41
962	< 1e-07	< 1e-07	0.178571	5336.39	95.28	56.01	ILMN_2161955	PGK2
470	< 1e-07	< 1e-07	0.178571	5011.21	101.55	49.35	ILMN_1742833	LOC644436
27	< 1e-07	< 1e-07	0.178571	5915.18	124.04	47.69	ILMN_1886493
291	< 1e-07	< 1e-07	0.178571	4742.02	100.43	47.22	ILMN_3231026	LOC654780
973	< 1e-07	< 1e-07	0.178571	10150	218.04	46.55	ILMN_3292244	LOC100132804
204	< 1e-07	< 1e-07	0.178571	4609.29	106.05	43.46	ILMN_1881909
332	< 1e-07	< 1e-07	0.178571	7476.66	180.27	41.47	ILMN_3178792	HNRNPA2B1
219	< 1e-07	< 1e-07	0.178571	6299.84	161.7	38.96	ILMN_1653432	HNRPDL
328	< 1e-07	< 1e-07	0.178571	3890.16	111.56	34.87	ILMN_2389114	FIGNL1
907	< 1e-07	< 1e-07	0.178571	4393.21	126.85	34.63	ILMN_3219631	LOC647081
590	< 1e-07	< 1e-07	0.178571	14008.2	415.03	33.75	ILMN_3290019	LOC646753
771	< 1e-07	< 1e-07	0.178571	6537.6	193.73	33.75	ILMN_1669718	PSENEN
66	< 1e-07	< 1e-07	0.178571	3734.69	115.01	32.47	ILMN_1778152	FIGNL1
692	< 1e-07	< 1e-07	0.178571	2965.36	92.88	31.93	ILMN_1689114	SFTPA2B
475	< 1e-07	< 1e-07	0.178571	12651.3	399.35	31.68	ILMN_3226613	LOC729686
739	< 1e-07	< 1e-07	0.178571	3671.99	121.99	30.1	ILMN_1712095	FOXO4
626	< 1e-07	< 1e-07	0.178571	3922.94	150.99	25.98	ILMN_1746396	CTNNB1
312	< 1e-07	< 1e-07	0.178571	3042.3	118.09	25.76	ILMN_1776879	HMGN2
20	< 1e-07	< 1e-07	0.178571	4411.67	177.71	24.83	ILMN_1719606	LOC644762
708	< 1e-07	< 1e-07	0.178571	2407.2	99.44	24.21	ILMN_1803698	STX16
404	< 1e-07	< 1e-07	0.178571	2919.2	122.44	23.84	ILMN_1718128	PABPC3
606	< 1e-07	< 1e-07	0.178571	3051.41	128.39	23.77	ILMN_3205924	LOC651198
422	< 1e-07	< 1e-07	0.178571	2490.94	105.29	23.66	ILMN_1806510	VPS53
616	< 1e-07	< 1e-07	0.178571	4885.26	209.32	23.34	ILMN_1691402	LOC644162
461	< 1e-07	< 1e-07	0.178571	4580.92	204.83	22.36	ILMN_3304203	LOC729342
1237	1e-07	1.25e-06	0.178571	9432.02	424.37	22.23	ILMN_2365549	BRPF1
458	< 1e-07	< 1e-07	0.178571	2213.98	99.7	22.21	ILMN_2189314	HDGFL1
635	< 1e-07	< 1e-07	0.178571	4743.9	214.37	22.13	ILMN_1664826	FBXO33
1061	1e-07	1.25e-06	0.178571	4445.7	202.22	21.98	ILMN_3224934	SFRS18
619	< 1e-07	< 1e-07	0.178571	2215.97	101.45	21.84	ILMN_1654942	NFIC
1074	1e-07	1.25e-06	0.178571	2763.19	126.78	21.79	ILMN_3227250	LOC729941
1151	1e-07	1.25e-06	0.178571	2371.59	113.45	20.9	ILMN_2361163	SSBP3
1198	1e-07	1.25e-06	0.178571	2576.37	123.65	20.84	ILMN_2374244	DYRK2
804	< 1e-07	< 1e-07	0.178571	4137.47	200.81	20.6	ILMN_1694799	PIAS2
746	< 1e-07	< 1e-07	0.178571	3412.09	165.94	20.56	ILMN_2364529	EZH2
339	< 1e-07	< 1e-07	0.178571	2251.43	109.95	20.48	ILMN_1770071	IFITM4P
162	< 1e-07	< 1e-07	0.178571	2275.49	111.16	20.47	ILMN_3308310	RNU86
417	< 1e-07	< 1e-07	0.178571	1936.36	95.5	20.28	ILMN_1658660	ACTC1
631	< 1e-07	< 1e-07	0.178571	5151.74	255.06	20.2	ILMN_3223317	LOC728666
92	< 1e-07	< 1e-07	0.178571	9226.3	461.37	20	ILMN_1679428	CHIC2
1100	1e-07	1.25e-06	0.178571	2044.89	102.37	19.98	ILMN_1656761	TGIF1
166	< 1e-07	< 1e-07	0.178571	1822.14	91.76	19.86	ILMN_2081210	RAB12
145	< 1e-07	< 1e-07	0.178571	3100.27	156.7	19.78	ILMN_1811472	KIF23
831	< 1e-07	< 1e-07	0.178571	3440.67	175.41	19.61	ILMN_1655311	LOC145853
721	< 1e-07	< 1e-07	0.178571	1830.58	95.34	19.2	ILMN_2085525	SNORA32
471	< 1e-07	< 1e-07	0.178571	8084.38	431.04	18.76	ILMN_1708743	NT5DC2
242	< 1e-07	< 1e-07	0.178571	3513.44	195.24	18	ILMN_2354855	OTUB1
108	< 1e-07	< 1e-07	0.178571	3249.99	181.49	17.91	ILMN_1808860	STX5
245	< 1e-07	< 1e-07	0.178571	2520.25	141.68	17.79	ILMN_3252093	LOC100128548
363	< 1e-07	< 1e-07	0.178571	2082.79	118.11	17.64	ILMN_1734428	LSM12
660	< 1e-07	< 1e-07	0.178571	3825.88	220.49	17.35	ILMN_3242120	RAP1BL
1188	1e-07	1.25e-06	0.178571	1676.15	97.23	17.24	ILMN_1756849	HIST1H2AE
1028	1e-07	1.25e-06	0.178571	7123.38	415.03	17.16	ILMN_1699603	MRPL12
658	< 1e-07	< 1e-07	0.178571	2068.89	121.31	17.05	ILMN_1742145	ESPL1
1065	1e-07	1.25e-06	0.178571	4379.57	257.22	17.03	ILMN_1800308	GTF2H4
618	< 1e-07	< 1e-07	0.178571	2955.85	174.25	16.96	ILMN_2363439	RYK
121	< 1e-07	< 1e-07	0.178571	5395.17	319.26	16.9	ILMN_2124352	DCUN1D5
257	< 1e-07	< 1e-07	0.178571	2906.52	172.29	16.87	ILMN_1714327	SETD1A
528	< 1e-07	< 1e-07	0.178571	2296.01	136.68	16.8	ILMN_1755620	IER5L
742	< 1e-07	< 1e-07	0.178571	2661.21	159.51	16.68	ILMN_1660079	RNF44
283	< 1e-07	< 1e-07	0.178571	2167.86	131.24	16.52	ILMN_1703427	SON
922	< 1e-07	< 1e-07	0.178571	1512.1	91.95	16.45	ILMN_1812327	RNF19A
767	< 1e-07	< 1e-07	0.178571	4462.6	273.69	16.31	ILMN_1718907	TSHZ1
1106	1e-07	1.25e-06	0.178571	3912.58	240.79	16.25	ILMN_1737344	DDX41
1176	1e-07	1.25e-06	0.178571	2628.44	162.99	16.13	ILMN_1683811	TNPO3
834	< 1e-07	< 1e-07	0.178571	1736.92	107.92	16.09	ILMN_1803590	ZFC3H1
105	< 1e-07	< 1e-07	0.178571	6102.94	379.66	16.07	ILMN_2045729	WDR12
112	< 1e-07	< 1e-07	0.178571	2922.06	183.73	15.9	ILMN_3201221	LOC341315
941	< 1e-07	< 1e-07	0.178571	1728.53	108.95	15.87	ILMN_1655155	PRPS1L1
541	< 1e-07	< 1e-07	0.178571	3055.79	195.81	15.61	ILMN_1741253	UBR5
888	< 1e-07	< 1e-07	0.178571	2036.95	131.09	15.54	ILMN_1710598	SKI
755	< 1e-07	< 1e-07	0.178571	2836.82	182.95	15.51	ILMN_1693668	KIAA0261
1030	1e-07	1.25e-06	0.178571	1797.25	115.92	15.5	ILMN_3240626	LOC100134424
566	< 1e-07	< 1e-07	0.178571	4063.18	263.1	15.44	ILMN_1692844	TBC1D19
1243	1e-07	1.25e-06	0.178571	2323.59	151.05	15.38	ILMN_1722409	LOC644816
764	< 1e-07	< 1e-07	0.178571	6181.52	403	15.34	ILMN_3237507	LOC552889
879	< 1e-07	< 1e-07	0.178571	1796.32	117.4	15.3	ILMN_1696946	LOC654174
390	< 1e-07	< 1e-07	0.178571	3004.32	197.11	15.24	ILMN_3229552	MED7
349	< 1e-07	< 1e-07	0.178571	1686.81	112.03	15.06	ILMN_1810441	TRIM3
86	< 1e-07	< 1e-07	0.178571	1759.39	117.08	15.03	ILMN_1749892	EGLN1
1122	1e-07	1.25e-06	0.178571	5438.34	363.17	14.97	ILMN_2103761	TLE4
1133	1e-07	1.25e-06	0.178571	9388.37	627.07	14.97	ILMN_1704385	LOC347376
405	< 1e-07	< 1e-07	0.178571	2360.26	158.32	14.91	ILMN_1763007	HIAT1
948	< 1e-07	< 1e-07	0.178571	1586.65	106.92	14.84	ILMN_1707173	HIST3H3
1111	1e-07	1.25e-06	0.178571	3598.91	242.66	14.83	ILMN_1765060	FBXO34
621	< 1e-07	< 1e-07	0.178571	3332.99	226.09	14.74	ILMN_2264625	NIPBL
438	< 1e-07	< 1e-07	0.178571	2093.46	142.32	14.71	ILMN_2282077	MIB2
643	< 1e-07	< 1e-07	0.178571	3462.6	236.68	14.63	ILMN_1670096	NRBP1
681	< 1e-07	< 1e-07	0.178571	1603.55	110.22	14.55	ILMN_1718679	USP19
1128	1e-07	1.25e-06	0.178571	2439.35	168.44	14.48	ILMN_1700811	UBFD1
750	< 1e-07	< 1e-07	0.178571	1362.4	94.16	14.47	ILMN_2397294	PLCB4
701	< 1e-07	< 1e-07	0.178571	6301.63	437.08	14.42	ILMN_1826531
1000	1e-07	1.25e-06	0.178571	1586.61	111.41	14.24	ILMN_1740088	LOC647920
1149	1e-07	1.25e-06	0.178571	3695.74	259.84	14.22	ILMN_1785324	MTHFD1
516	< 1e-07	< 1e-07	0.178571	1817.75	128.97	14.09	ILMN_1753008	REXO1
522	< 1e-07	< 1e-07	0.178571	6868.91	487.96	14.08	ILMN_2336781	SOD2
900	< 1e-07	< 1e-07	0.178571	2519.89	179.94	14	ILMN_1800952	PSMD11
684	< 1e-07	< 1e-07	0.178571	1745.51	125.35	13.93	ILMN_1744244	DPAGT1
420	< 1e-07	< 1e-07	0.178571	8783.16	632.89	13.88	ILMN_1696485	HNRNPAB
1138	1e-07	1.25e-06	0.178571	1582.15	116.69	13.56	ILMN_1726928	TCEA3
580	< 1e-07	< 1e-07	0.178571	2670.72	197.49	13.52	ILMN_1813594	PREI3
967	< 1e-07	< 1e-07	0.178571	1427.72	106.34	13.43	ILMN_1686060	LOC729777
343	< 1e-07	< 1e-07	0.178571	2256.42	169.13	13.34	ILMN_3229652	LOC728953
677	< 1e-07	< 1e-07	0.178571	3142.6	239.26	13.13	ILMN_1786125	CCNA2
40	< 1e-07	< 1e-07	0.178571	1560.85	119.16	13.1	ILMN_1787326	SNORA65
1107	1e-07	1.25e-06	0.178571	1975.22	150.97	13.08	ILMN_1729832	LOC653994
1076	1e-07	1.25e-06	0.178571	1832.74	140.57	13.04	ILMN_1770865	TRIM46
720	< 1e-07	< 1e-07	0.178571	5008.49	385.41	13	ILMN_2215640	TUBA3D
508	< 1e-07	< 1e-07	0.178571	1599.02	123.5	12.95	ILMN_3242176	UBR3
792	< 1e-07	< 1e-07	0.178571	1243.45	97.2	12.79	ILMN_1808011	FAM46B
719	< 1e-07	< 1e-07	0.178571	1745.14	136.86	12.75	ILMN_1753925	LOC645609
663	< 1e-07	< 1e-07	0.178571	1577.62	124.2	12.7	ILMN_1797201	KRTAP10-2
1180	1e-07	1.25e-06	0.178571	10176	806.67	12.61	ILMN_1750079	PURB
333	< 1e-07	< 1e-07	0.178571	2151.34	171.87	12.52	ILMN_3275033	LOC646841
840	< 1e-07	< 1e-07	0.178571	7971.01	639.32	12.47	ILMN_1683969	FKBP1A
293	< 1e-07	< 1e-07	0.178571	1754.11	143.39	12.23	ILMN_1663489	UBR2
637	< 1e-07	< 1e-07	0.178571	3282.47	271.36	12.1	ILMN_2340721	TMEM134
763	< 1e-07	< 1e-07	0.178571	2259.51	187.24	12.07	ILMN_1809695	CAMK2G
71	< 1e-07	< 1e-07	0.178571	1212.85	101.03	12	ILMN_1664025	PXMP4
672	< 1e-07	< 1e-07	0.178571	1559	130.02	11.99	ILMN_3223246	TBC1D3F
851	< 1e-07	< 1e-07	0.178571	4419.8	370.83	11.92	ILMN_3200717	LOC643387
1118	1e-07	1.25e-06	0.178571	3158.65	265	11.92	ILMN_1791097	RSBN1
1164	1e-07	1.25e-06	0.178571	2788.44	235.35	11.85	ILMN_1736510	FOXN2
898	< 1e-07	< 1e-07	0.178571	2005.27	170.85	11.74	ILMN_1733155	GIT1
169	< 1e-07	< 1e-07	0.178571	4264.9	364.84	11.69	ILMN_1691575	SNX2
1005	1e-07	1.25e-06	0.178571	1776.49	153.84	11.55	ILMN_2362902	RASSF5
192	< 1e-07	< 1e-07	0.178571	1435.55	124.39	11.54	ILMN_2201668	SLC19A2
1246	1e-07	1.25e-06	0.178571	1970.66	171.21	11.51	ILMN_2150258	ZFP36L2
728	< 1e-07	< 1e-07	0.178571	1438.29	126.01	11.41	ILMN_3260017	HNRNPK
117	< 1e-07	< 1e-07	0.178571	3808	336.89	11.3	ILMN_1694502	PRIM1
802	< 1e-07	< 1e-07	0.178571	1400.28	124.43	11.25	ILMN_1664118	LOC643665
460	< 1e-07	< 1e-07	0.178571	1536.61	137.79	11.15	ILMN_1723743	ROM1
1163	1e-07	1.25e-06	0.178571	1786.67	161.74	11.05	ILMN_1713402	FAM160A2
640	< 1e-07	< 1e-07	0.178571	1344.57	121.89	11.03	ILMN_1680899	TTLL3
240	< 1e-07	< 1e-07	0.178571	1265.95	114.85	11.02	ILMN_1764573	XIST
501	< 1e-07	< 1e-07	0.178571	1670.11	153.68	10.87	ILMN_1692916	LOC646135
664	< 1e-07	< 1e-07	0.178571	1394.32	128.69	10.83	ILMN_3236211	DGCR11
806	< 1e-07	< 1e-07	0.178571	1398.84	129.62	10.79	ILMN_2231911	AUH
641	< 1e-07	< 1e-07	0.178571	2978.91	276.71	10.77	ILMN_1789283	PPP2R5C
889	< 1e-07	< 1e-07	0.178571	8852.79	835.23	10.6	ILMN_3199737	LOC727865
775	< 1e-07	< 1e-07	0.178571	6616.54	635.55	10.41	ILMN_3300744	LOC728666
10	< 1e-07	< 1e-07	0.178571	1360.14	131.36	10.35	ILMN_1782095	C20orf55
1052	1e-07	1.25e-06	0.178571	4331.09	420.7	10.29	ILMN_1705093	ORC5L
155	< 1e-07	< 1e-07	0.178571	1619.65	158.39	10.23	ILMN_1696699	FAM184A
1187	1e-07	1.25e-06	0.178571	1560.65	153	10.2	ILMN_1803995	TM7SF3
1041	1e-07	1.25e-06	0.178571	1378.44	135.39	10.18	ILMN_1803597	FGL1
1168	1e-07	1.25e-06	0.178571	1385.26	136.89	10.12	ILMN_1774086	CBX3
1012	1e-07	1.25e-06	0.178571	1587.47	157.44	10.08	ILMN_1669259	ANKRD49
788	< 1e-07	< 1e-07	0.178571	1325.39	131.75	10.06	ILMN_1718831	TMEM57
917	< 1e-07	< 1e-07	0.178571	1429.3	142.39	10.04	ILMN_1671152	LOC649801
147	< 1e-07	< 1e-07	0.178571	1382.12	137.85	10.03	ILMN_1712914	SEMA6B
226	< 1e-07	< 1e-07	0.178571	8367.69	836.94	10	ILMN_1734826	NUP88
1132	1e-07	1.25e-06	0.178571	9303.98	932.91	9.97	ILMN_1655316	PSMC6
477	< 1e-07	< 1e-07	0.178571	1329.7	133.73	9.94	ILMN_1652160	LRBA
1217	1e-07	1.25e-06	0.178571	1308.11	132.02	9.91	ILMN_3243606	C14orf174
821	< 1e-07	< 1e-07	0.178571	4946.88	503.22	9.83	ILMN_2357770	TCEA1
45	< 1e-07	< 1e-07	0.178571	1129.51	115.62	9.77	ILMN_1698745	CLRN1
596	< 1e-07	< 1e-07	0.178571	2635.36	275.67	9.56	ILMN_1727361	LEMD3
949	< 1e-07	< 1e-07	0.178571	1281.81	134.31	9.54	ILMN_2173909	ZNF14
218	< 1e-07	< 1e-07	0.178571	6715.58	706.21	9.51	ILMN_1800837	CFDP1
505	< 1e-07	< 1e-07	0.178571	1237.73	131.06	9.44	ILMN_1880103
1119	1e-07	1.25e-06	0.178571	3635.57	386.74	9.4	ILMN_1727073	MEA1
846	< 1e-07	< 1e-07	0.178571	3194.22	346.23	9.23	ILMN_1729112	CHPT1
540	< 1e-07	< 1e-07	0.178571	940.92	103.28	9.11	ILMN_1815639	GIGYF1
1215	1e-07	1.25e-06	0.178571	1152.65	126.96	9.08	ILMN_1735792	RHBDF2
785	< 1e-07	< 1e-07	0.178571	938.2	105.15	8.92	ILMN_1759708	LOC643959
350	< 1e-07	< 1e-07	0.178571	1229.88	138.22	8.9	ILMN_3235584	TRIM66
611	< 1e-07	< 1e-07	0.178571	1346.94	151.93	8.87	ILMN_1680436	CSHL1
1216	1e-07	1.25e-06	0.178571	7399.03	834.18	8.87	ILMN_1880406
270	< 1e-07	< 1e-07	0.178571	1108.02	126.81	8.74	ILMN_1791867	EPB41L4A
1194	1e-07	1.25e-06	0.178571	1073.03	122.99	8.72	ILMN_3241729	EMX2OS
1057	1e-07	1.25e-06	0.178571	1567.08	180.22	8.7	ILMN_1657478	MAGEL2
1222	1e-07	1.25e-06	0.178571	3461.65	412.4	8.39	ILMN_1762115	CRYZL1
345	< 1e-07	< 1e-07	0.178571	18995.1	2271.25	8.36	ILMN_1659405	LOC653773
351	< 1e-07	< 1e-07	0.178571	5821.7	706.96	8.23	ILMN_1798254	ACTR10
280	< 1e-07	< 1e-07	0.178571	961.86	119.07	8.08	ILMN_1848461
852	< 1e-07	< 1e-07	0.178571	1335.87	166.76	8.01	ILMN_1781151	ARMC8
451	< 1e-07	< 1e-07	0.178571	1503.16	188.69	7.97	ILMN_1662719	GPBP1L1
263	< 1e-07	< 1e-07	0.178571	4936.3	632.5	7.8	ILMN_1771734	LOC728564
425	< 1e-07	< 1e-07	0.178571	4772.99	636.76	7.5	ILMN_2333367	FKBP1A
484	< 1e-07	< 1e-07	0.178571	2392.72	320.38	7.47	ILMN_3275771	LOC642567
868	< 1e-07	< 1e-07	0.178571	7699.44	1040.83	7.4	ILMN_2175894	HNRPR
194	< 1e-07	< 1e-07	0.178571	1715.24	244.05	7.03	ILMN_2052891	PKD2
1171	1e-07	1.25e-06	0.178571	1317.07	188.5	6.99	ILMN_1814985	PDLIM7
588	< 1e-07	< 1e-07	0.178571	1103.77	162.3	6.8	ILMN_1715175	MET
1002	1e-07	1.25e-06	0.178571	803.01	119.26	6.73	ILMN_1718971	TTC7B
1036	1e-07	1.25e-06	0.178571	1439.23	225.51	6.38	ILMN_1653367	TAF12
401	< 1e-07	< 1e-07	0.178571	6897.01	1122.69	6.14	ILMN_2345837	CLTA
497	< 1e-07	< 1e-07	0.178571	1787.31	304	5.88	ILMN_1689704	TMEM5
1228	1e-07	1.25e-06	0.178571	1161.19	197.46	5.88	ILMN_1680693	ZNF419
1102	1e-07	1.25e-06	0.178571	1533.93	269.47	5.69	ILMN_3284177	LOC100132425
918	< 1e-07	< 1e-07	0.178571	7278.65	1338.52	5.44	ILMN_2166865	ENY2
722	< 1e-07	< 1e-07	0.178571	25786.9	5700.61	4.52	ILMN_1707858	H2AFZ
1160	1e-07	1.25e-06	0.178571	12791.1	3197.89	4	ILMN_1672496	DNAJA1
648	< 1e-07	< 1e-07	0.178571	10584.1	3325.01	3.18	ILMN_1745385	HNRPM

## Sheet: high in heNSC
	Parametric p-value	FDR	Permutation p-value	Geom mean of intensities in class 1	Geom mean of intensities in class 2	Fold-change	UniqueID	Symbol
18	< 1e-07	< 1e-07	0.178571	93.49	23300.1	0.004	ILMN_2046730	S100A10
22	< 1e-07	< 1e-07	0.178571	98.84	23300.9	0.0042	ILMN_1736500	GNB2L1
1072	1e-07	1.25e-06	0.178571	93.26	22457.3	0.0042	ILMN_2038777	ACTB
31	< 1e-07	< 1e-07	0.178571	91.07	18707.2	0.0049	ILMN_2152131	ACTB
1143	1e-07	1.25e-06	0.178571	113.39	22849.8	0.005	ILMN_2053178	ACTG1
170	< 1e-07	< 1e-07	0.178571	92.36	17061.4	0.0054	ILMN_1746516	RPS25
285	< 1e-07	< 1e-07	0.178571	99.63	17864.3	0.0056	ILMN_3274601	LOC343184
214	< 1e-07	< 1e-07	0.178571	94.39	14197.8	0.0066	ILMN_1740587	RPS11
561	< 1e-07	< 1e-07	0.178571	103.31	14678	0.007	ILMN_2141453	RPL18A
186	< 1e-07	< 1e-07	0.178571	95.75	13533.2	0.0071	ILMN_2234697	BEX1
1089	1e-07	1.25e-06	0.178571	111.46	15484.2	0.0072	ILMN_3279277	LOC387930
600	< 1e-07	< 1e-07	0.178571	100.42	12423.1	0.0081	ILMN_3246850	LOC648729
91	< 1e-07	< 1e-07	0.178571	91.72	10864.7	0.0084	ILMN_1803429	CD44
357	< 1e-07	< 1e-07	0.178571	91.47	10237.6	0.0089	ILMN_1771376	PEA15
639	< 1e-07	< 1e-07	0.178571	121.53	12526.7	0.0097	ILMN_1684258	LOC646195
23	< 1e-07	< 1e-07	0.178571	97.23	9813.47	0.0099	ILMN_1765043	RPL38
11	< 1e-07	< 1e-07	0.178571	87.73	8103.08	0.011	ILMN_1759097	MLLT11
26	< 1e-07	< 1e-07	0.178571	85.56	8105.09	0.011	ILMN_1689329	SCD
174	< 1e-07	< 1e-07	0.178571	100.42	8892.22	0.011	ILMN_2411723	RPSA
860	< 1e-07	< 1e-07	0.178571	113.05	9880.25	0.011	ILMN_3245559	CDK2AP1
57	< 1e-07	< 1e-07	0.178571	88.32	7352.46	0.012	ILMN_1730611	RTN4
67	< 1e-07	< 1e-07	0.178571	93.02	8033.16	0.012	ILMN_2225887	ATP5EP2
88	< 1e-07	< 1e-07	0.178571	88.73	7547.07	0.012	ILMN_1723874	MRPS6
564	< 1e-07	< 1e-07	0.178571	111.55	9019.13	0.012	ILMN_1746085	IGFBP3
646	< 1e-07	< 1e-07	0.178571	97.15	8010.44	0.012	ILMN_3225938	LOC729402
16	< 1e-07	< 1e-07	0.178571	99.01	7727.68	0.013	ILMN_1788742	LOC441246
37	< 1e-07	< 1e-07	0.178571	100.94	7758.88	0.013	ILMN_3234831	LOC645296
62	< 1e-07	< 1e-07	0.178571	95.02	7342.1	0.013	ILMN_1701832	RPL19
101	< 1e-07	< 1e-07	0.178571	88.17	6380.45	0.014	ILMN_2355559	PSAP
106	< 1e-07	< 1e-07	0.178571	85.9	6295.49	0.014	ILMN_1803180	PRDX6
135	< 1e-07	< 1e-07	0.178571	94.37	6522.77	0.014	ILMN_1801616	EMP1
348	< 1e-07	< 1e-07	0.178571	114.94	8257.66	0.014	ILMN_1797728	HMGCS1
638	< 1e-07	< 1e-07	0.178571	115.78	8265.07	0.014	ILMN_2409167	ANXA2
916	< 1e-07	< 1e-07	0.178571	118.01	8145.34	0.014	ILMN_1656791	RPS6
1091	1e-07	1.25e-06	0.178571	90.8	6516.62	0.014	ILMN_1764721	RPL8
279	< 1e-07	< 1e-07	0.178571	93.13	6382.59	0.015	ILMN_1782439	CNN3
49	< 1e-07	< 1e-07	0.178571	87.94	5426.85	0.016	ILMN_2235707	ITIH5
89	< 1e-07	< 1e-07	0.178571	110.72	6916.74	0.016	ILMN_1798189	COX7C
99	< 1e-07	< 1e-07	0.178571	85.71	5267.84	0.016	ILMN_1780141	TMEM66
151	< 1e-07	< 1e-07	0.178571	90.67	5718.47	0.016	ILMN_1666471	UQCRQ
346	< 1e-07	< 1e-07	0.178571	90.65	5541.06	0.016	ILMN_2120273	AP1S2
487	< 1e-07	< 1e-07	0.178571	116.12	7309.06	0.016	ILMN_3206866	LOC100132593
511	< 1e-07	< 1e-07	0.178571	113.2	6977.62	0.016	ILMN_2142815	RPL35
565	< 1e-07	< 1e-07	0.178571	95.29	5834.72	0.016	ILMN_1652207	COX4I1
567	< 1e-07	< 1e-07	0.178571	95.09	6129.41	0.016	ILMN_3281599	LOC642741
977	1e-07	1.25e-06	0.178571	111.47	7055.94	0.016	ILMN_3272996	LOC100129141
2	< 1e-07	< 1e-07	0.178571	85.73	5107.7	0.017	ILMN_1661945	C14orf156
137	< 1e-07	< 1e-07	0.178571	85.37	5070.04	0.017	ILMN_2337241	RPS15A
265	< 1e-07	< 1e-07	0.178571	90.26	5341.32	0.017	ILMN_1776104	NDUFS5
32	< 1e-07	< 1e-07	0.178571	90.74	5037.53	0.018	ILMN_2365711	2011-09-02
65	< 1e-07	< 1e-07	0.178571	83.88	4716.55	0.018	ILMN_2067656	CCND2
127	< 1e-07	< 1e-07	0.178571	91.61	4986.39	0.018	ILMN_1726603	ATP5I
188	< 1e-07	< 1e-07	0.178571	81.38	4493.7	0.018	ILMN_1808939	RPS6
288	< 1e-07	< 1e-07	0.178571	87.46	4770.81	0.018	ILMN_2381397	HSPD1
491	< 1e-07	< 1e-07	0.178571	109.34	5973.65	0.018	ILMN_2326713	CD151
904	< 1e-07	< 1e-07	0.178571	124.43	6794.1	0.018	ILMN_2038776	TXN
486	< 1e-07	< 1e-07	0.178571	107.55	5705.72	0.019	ILMN_1737015	RPL39
574	< 1e-07	< 1e-07	0.178571	107.96	5806.31	0.019	ILMN_1731174	LOC647856
1086	1e-07	1.25e-06	0.178571	104.21	5496.99	0.019	ILMN_3272378	EZR
19	< 1e-07	< 1e-07	0.178571	88.77	4503.75	0.02	ILMN_1683562	SNRPG
459	< 1e-07	< 1e-07	0.178571	86.85	4259.11	0.02	ILMN_2144088	FDFT1
483	< 1e-07	< 1e-07	0.178571	88.76	4410.46	0.02	ILMN_1784871	FASN
41	< 1e-07	< 1e-07	0.178571	90.49	4307.68	0.021	ILMN_2333319	PTBP1
340	< 1e-07	< 1e-07	0.178571	111.68	5416.13	0.021	ILMN_3244117	STMN3
513	< 1e-07	< 1e-07	0.178571	101.33	4758.4	0.021	ILMN_3201115	LOC440043
36	< 1e-07	< 1e-07	0.178571	87.23	3981.61	0.022	ILMN_1791332	ATP5O
129	< 1e-07	< 1e-07	0.178571	87.45	3984.64	0.022	ILMN_1691506	NGRN
187	< 1e-07	< 1e-07	0.178571	94	4286.73	0.022	ILMN_2308582	CYB5R3
359	< 1e-07	< 1e-07	0.178571	91.04	4217.39	0.022	ILMN_1801928	YWHAZ
812	< 1e-07	< 1e-07	0.178571	114.21	5272.79	0.022	ILMN_1763404	LOC653226
1218	1e-07	1.25e-06	0.178571	105.79	4729.52	0.022	ILMN_1789005	ATP6V0C
38	< 1e-07	< 1e-07	0.178571	98.94	4212	0.023	ILMN_1821517
110	< 1e-07	< 1e-07	0.178571	83.16	3673.54	0.023	ILMN_1745172	ILF2
143	< 1e-07	< 1e-07	0.178571	92.16	3938.92	0.023	ILMN_2398159	DKK3
222	< 1e-07	< 1e-07	0.178571	93.75	4035.38	0.023	ILMN_3240740	EIF3L
229	< 1e-07	< 1e-07	0.178571	91.8	3920.59	0.023	ILMN_1736353	PSMC1
329	< 1e-07	< 1e-07	0.178571	90.01	3965.19	0.023	ILMN_1769118	2011-09-09
855	< 1e-07	< 1e-07	0.178571	100	4280.4	0.023	ILMN_2394438	FAM177A1
909	< 1e-07	< 1e-07	0.178571	93.49	4146.52	0.023	ILMN_1680314	TXN
21	< 1e-07	< 1e-07	0.178571	85.7	3582.02	0.024	ILMN_1806754	GLDC
53	< 1e-07	< 1e-07	0.178571	86.8	3545.17	0.024	ILMN_2058141	HMGN2
311	< 1e-07	< 1e-07	0.178571	91.18	3726.8	0.024	ILMN_1661170	NDUFB8
426	< 1e-07	< 1e-07	0.178571	98.61	4043.03	0.024	ILMN_1660718	GABBR2
429	< 1e-07	< 1e-07	0.178571	100.13	4122.58	0.024	ILMN_1723467	ITGB1
526	< 1e-07	< 1e-07	0.178571	102.11	4218.42	0.024	ILMN_3291098	LOC643531
807	< 1e-07	< 1e-07	0.178571	102.31	4182.31	0.024	ILMN_3251472	TOMM20
850	< 1e-07	< 1e-07	0.178571	90.06	3711.83	0.024	ILMN_2184184	ANXA1
1020	1e-07	1.25e-06	0.178571	94.84	3992.34	0.024	ILMN_1748546	2011-09-02
61	< 1e-07	< 1e-07	0.178571	94.95	3761.19	0.025	ILMN_3287093	LOC646819
181	< 1e-07	< 1e-07	0.178571	89.2	3544.57	0.025	ILMN_1755536	PFDN5
253	< 1e-07	< 1e-07	0.178571	86.29	3482.39	0.025	ILMN_2189933	RPL36AL
506	< 1e-07	< 1e-07	0.178571	93.9	3774.91	0.025	ILMN_2232936	UQCRH
4	< 1e-07	< 1e-07	0.178571	82.82	3206.41	0.026	ILMN_1796165	GLRX5
24	< 1e-07	< 1e-07	0.178571	86.17	3333.04	0.026	ILMN_1672128	ATF4
54	< 1e-07	< 1e-07	0.178571	101.06	3945.49	0.026	ILMN_1757552	PTRF
63	< 1e-07	< 1e-07	0.178571	87	3349.14	0.026	ILMN_1720048	CCL2
83	< 1e-07	< 1e-07	0.178571	88.59	3432.32	0.026	ILMN_2354515	NDUFAF3
313	< 1e-07	< 1e-07	0.178571	88.71	3471.19	0.026	ILMN_1806023	JUN
587	< 1e-07	< 1e-07	0.178571	89.91	3403.96	0.026	ILMN_1659437	TXNDC17
473	< 1e-07	< 1e-07	0.178571	91.29	3340.06	0.027	ILMN_1655765	MRPS21
1166	1e-07	1.25e-06	0.178571	90.58	3354.65	0.027	ILMN_1778668	TAGLN
140	< 1e-07	< 1e-07	0.178571	85.6	3104.09	0.028	ILMN_2087060	TOMM7
203	< 1e-07	< 1e-07	0.178571	92.82	3371.38	0.028	ILMN_1780036	WDR1
939	< 1e-07	< 1e-07	0.178571	113.18	4052.84	0.028	ILMN_1809495	COX8A
34	< 1e-07	< 1e-07	0.178571	96.52	3328.87	0.029	ILMN_2151579	HMGN1
212	< 1e-07	< 1e-07	0.178571	85.93	2942.14	0.029	ILMN_1814726	SCARB2
236	< 1e-07	< 1e-07	0.178571	95.16	3290.64	0.029	ILMN_2237428	SCD5
243	< 1e-07	< 1e-07	0.178571	98.99	3455.5	0.029	ILMN_3240247	NOP10
272	< 1e-07	< 1e-07	0.178571	91.6	3191.68	0.029	ILMN_1666372	ATP5H
370	< 1e-07	< 1e-07	0.178571	100.28	3478.9	0.029	ILMN_1728132	LDHB
595	< 1e-07	< 1e-07	0.178571	104.77	3673.67	0.029	ILMN_1718136	UQCRHL
12	< 1e-07	< 1e-07	0.178571	105.58	3576.57	0.03	ILMN_1674069	TOMM7
13	< 1e-07	< 1e-07	0.178571	89.21	2984.02	0.03	ILMN_1795937	VIL2
85	< 1e-07	< 1e-07	0.178571	94.61	3149.36	0.03	ILMN_1734190	TCEAL3
177	< 1e-07	< 1e-07	0.178571	95.08	3169.93	0.03	ILMN_3256004	LOC100130003
197	< 1e-07	< 1e-07	0.178571	98.82	3243.45	0.03	ILMN_3248443	SNHG6
297	< 1e-07	< 1e-07	0.178571	90.03	3005.15	0.03	ILMN_2226324	BRP44L
410	< 1e-07	< 1e-07	0.178571	91.96	3116.09	0.03	ILMN_2052790	NONO
411	< 1e-07	< 1e-07	0.178571	108.84	3569.05	0.03	ILMN_1693311	TMBIM6
520	< 1e-07	< 1e-07	0.178571	101.5	3413.46	0.03	ILMN_1721876	TIMP2
543	< 1e-07	< 1e-07	0.178571	88.01	2904.4	0.03	ILMN_1815673	DKK3
737	< 1e-07	< 1e-07	0.178571	99.51	3303.45	0.03	ILMN_1728605	TTC3
965	< 1e-07	< 1e-07	0.178571	96.07	3171.27	0.03	ILMN_1787026	SEC61G
1035	1e-07	1.25e-06	0.178571	115.07	3807.98	0.03	ILMN_1803846	EIF1
180	< 1e-07	< 1e-07	0.178571	92.29	3002.3	0.031	ILMN_2167922	TRMT5
1093	1e-07	1.25e-06	0.178571	87.56	2783.84	0.031	ILMN_2384122	GPR56
1155	1e-07	1.25e-06	0.178571	92.2	2961.35	0.031	ILMN_2412521	KIAA0101
1162	1e-07	1.25e-06	0.178571	91.67	2989.9	0.031	ILMN_1685088	RPL36
6	< 1e-07	< 1e-07	0.178571	99.65	3099.82	0.032	ILMN_1793829	TMCO1
60	< 1e-07	< 1e-07	0.178571	94.52	2935.46	0.032	ILMN_3249230	LOC100133649
81	< 1e-07	< 1e-07	0.178571	90.54	2867.55	0.032	ILMN_1775937	DDB1
305	< 1e-07	< 1e-07	0.178571	99.88	3083.72	0.032	ILMN_1698258	DNAJC8
365	< 1e-07	< 1e-07	0.178571	94.55	2934.38	0.032	ILMN_1657204	SAE1
624	< 1e-07	< 1e-07	0.178571	103.71	3290.43	0.032	ILMN_1797604	CAP1
741	< 1e-07	< 1e-07	0.178571	93.83	2909.58	0.032	ILMN_1742238	SET
837	< 1e-07	< 1e-07	0.178571	111.27	3495.75	0.032	ILMN_1693287	POMP
14	< 1e-07	< 1e-07	0.178571	90.31	2773.81	0.033	ILMN_2175131	TMEM14C
464	< 1e-07	< 1e-07	0.178571	87.24	2640.1	0.033	ILMN_2387696	CCR6
759	< 1e-07	< 1e-07	0.178571	99.17	3026.11	0.033	ILMN_1748438	POLR2G
95	< 1e-07	< 1e-07	0.178571	88.75	2575.73	0.034	ILMN_2367239	RCAN1
1	< 1e-07	< 1e-07	0.178571	88.63	2545.73	0.035	ILMN_1756355	NDUFS3
17	< 1e-07	< 1e-07	0.178571	93.7	2701.45	0.035	ILMN_2142554	NENF
90	< 1e-07	< 1e-07	0.178571	90.55	2622.82	0.035	ILMN_2070300	LSM2
96	< 1e-07	< 1e-07	0.178571	94.28	2659.9	0.035	ILMN_3225761	MGC87895
430	< 1e-07	< 1e-07	0.178571	106.81	3039.95	0.035	ILMN_1737398	PTPLAD1
532	< 1e-07	< 1e-07	0.178571	88.54	2534.34	0.035	ILMN_1690982	DDT
68	< 1e-07	< 1e-07	0.178571	86.76	2397.32	0.036	ILMN_1729816	VDAC3
123	< 1e-07	< 1e-07	0.178571	98.5	2726.93	0.036	ILMN_2148459	B2M
249	< 1e-07	< 1e-07	0.178571	84.1	2361.1	0.036	ILMN_1726981	VEGFB
260	< 1e-07	< 1e-07	0.178571	92.4	2555.03	0.036	ILMN_1697176	GFAP
295	< 1e-07	< 1e-07	0.178571	101.68	2809.99	0.036	ILMN_1713756	GLUD1
28	< 1e-07	< 1e-07	0.178571	91.43	2494.92	0.037	ILMN_1726204	SCRG1
286	< 1e-07	< 1e-07	0.178571	92.92	2536.14	0.037	ILMN_2101832	LAPTM4B
304	< 1e-07	< 1e-07	0.178571	105.18	2880.59	0.037	ILMN_1804854	CTNNA1
309	< 1e-07	< 1e-07	0.178571	98.55	2636.18	0.037	ILMN_1697694	ATP6AP1
403	< 1e-07	< 1e-07	0.178571	89.64	2436.04	0.037	ILMN_2089073	ATP9A
434	< 1e-07	< 1e-07	0.178571	103	2821.82	0.037	ILMN_1720889	SC4MOL
727	< 1e-07	< 1e-07	0.178571	92.73	2510.97	0.037	ILMN_1726169	EDF1
1022	1e-07	1.25e-06	0.178571	87.47	2343.15	0.037	ILMN_2380698	DSTN
1123	1e-07	1.25e-06	0.178571	97.34	2631.34	0.037	ILMN_1740819	STARD7
1167	1e-07	1.25e-06	0.178571	102.29	2742.3	0.037	ILMN_1660021	M6PRBP1
1174	1e-07	1.25e-06	0.178571	112.85	3021.1	0.037	ILMN_3251341	TUBA1C
7	< 1e-07	< 1e-07	0.178571	95.62	2537.99	0.038	ILMN_2064898	CCDC56
326	< 1e-07	< 1e-07	0.178571	90.51	2381.19	0.038	ILMN_2383975	PRDX5
327	< 1e-07	< 1e-07	0.178571	100.59	2644.36	0.038	ILMN_1710962	TMEM97
396	< 1e-07	< 1e-07	0.178571	113.54	2968.13	0.038	ILMN_2055165	MRFAP1
439	< 1e-07	< 1e-07	0.178571	103.11	2735.34	0.038	ILMN_1695290	FERMT2
908	< 1e-07	< 1e-07	0.178571	108.25	2860.49	0.038	ILMN_1668369	CDC37
1148	1e-07	1.25e-06	0.178571	92.53	2403.32	0.038	ILMN_1660577	ATP5G2
182	< 1e-07	< 1e-07	0.178571	93.51	2377.43	0.039	ILMN_1806778	UBE2E1
201	< 1e-07	< 1e-07	0.178571	94.39	2405.23	0.039	ILMN_1702177	GLO1
446	< 1e-07	< 1e-07	0.178571	88.37	2238.89	0.039	ILMN_1717868	CCT8
717	< 1e-07	< 1e-07	0.178571	90.5	2345.39	0.039	ILMN_1698179	TAGLN3
736	< 1e-07	< 1e-07	0.178571	101.41	2623.69	0.039	ILMN_1768396	AURKAIP1
1029	1e-07	1.25e-06	0.178571	108.55	2801.55	0.039	ILMN_1737862	PSMB4
1184	1e-07	1.25e-06	0.178571	94.31	2392.5	0.039	ILMN_1660732	PPP2R2B
33	< 1e-07	< 1e-07	0.178571	85.52	2120.5	0.04	ILMN_1679796	TOMM20
352	< 1e-07	< 1e-07	0.178571	99.68	2462.82	0.04	ILMN_1760201	DNMT1
391	< 1e-07	< 1e-07	0.178571	95.24	2407.36	0.04	ILMN_2368292	TSEN34
447	< 1e-07	< 1e-07	0.178571	101.15	2517.83	0.04	ILMN_1728049	S100A16
455	< 1e-07	< 1e-07	0.178571	104.6	2637.66	0.04	ILMN_1773906	NCOA4
553	< 1e-07	< 1e-07	0.178571	98.74	2486.48	0.04	ILMN_1654016	MRLC2
633	< 1e-07	< 1e-07	0.178571	98.32	2430.78	0.04	ILMN_1783636	COX6A1
777	< 1e-07	< 1e-07	0.178571	114.5	2842.28	0.04	ILMN_1651228	RPS28
946	< 1e-07	< 1e-07	0.178571	92.73	2330.68	0.04	ILMN_1748093	PAFAH1B3
234	< 1e-07	< 1e-07	0.178571	97.85	2391.53	0.041	ILMN_1735584	ST8SIA5
427	< 1e-07	< 1e-07	0.178571	92.53	2279.27	0.041	ILMN_1802615	CDK6
957	< 1e-07	< 1e-07	0.178571	91.32	2205.89	0.041	ILMN_2179018	NDUFAB1
1179	1e-07	1.25e-06	0.178571	91.55	2256.94	0.041	ILMN_1652631	GLIPR2
154	< 1e-07	< 1e-07	0.178571	103.39	2458.75	0.042	ILMN_1667081	CCND2
275	< 1e-07	< 1e-07	0.178571	115.51	2720.19	0.042	ILMN_1753342	SAT1
277	< 1e-07	< 1e-07	0.178571	90.43	2178.09	0.042	ILMN_2339779	ATP6V1E1
1159	1e-07	1.25e-06	0.178571	102.55	2403	0.043	ILMN_1740180	SNX3
142	< 1e-07	< 1e-07	0.178571	90.67	2043.71	0.044	ILMN_1709611	PSMA1
244	< 1e-07	< 1e-07	0.178571	92.85	2100.78	0.044	ILMN_1790549	TSPAN3
256	< 1e-07	< 1e-07	0.178571	99.02	2232.65	0.044	ILMN_3249748	LDHA
415	< 1e-07	< 1e-07	0.178571	95.84	2182.95	0.044	ILMN_2294762	AMY1A
704	< 1e-07	< 1e-07	0.178571	105.66	2392.75	0.044	ILMN_1664956	SSU72
729	< 1e-07	< 1e-07	0.178571	89.24	2040.25	0.044	ILMN_1769091	PRCP
738	< 1e-07	< 1e-07	0.178571	85.39	1930.37	0.044	ILMN_1773760	PAICS
1018	1e-07	1.25e-06	0.178571	95.23	2165.52	0.044	ILMN_1780058	DEGS1
454	< 1e-07	< 1e-07	0.178571	93.91	2089.82	0.045	ILMN_1799604	OCIAD1
456	< 1e-07	< 1e-07	0.178571	85.66	1885.01	0.045	ILMN_1731546	RPL26
478	< 1e-07	< 1e-07	0.178571	97.78	2177.21	0.045	ILMN_1718988	DAZAP2
752	< 1e-07	< 1e-07	0.178571	85.04	1881.69	0.045	ILMN_1653856	STS-1
1056	1e-07	1.25e-06	0.178571	106.44	2364.14	0.045	ILMN_1784523	ATP6V1G1
64	< 1e-07	< 1e-07	0.178571	92.08	2006.42	0.046	ILMN_1666399	RING1
128	< 1e-07	< 1e-07	0.178571	96.95	2114.69	0.046	ILMN_3260070	LOC100128266
173	< 1e-07	< 1e-07	0.178571	90.1	1974.27	0.046	ILMN_2230902	CTNNA1
400	< 1e-07	< 1e-07	0.178571	86.9	1895.51	0.046	ILMN_2112301	DRAP1
740	< 1e-07	< 1e-07	0.178571	93.2	2032.07	0.046	ILMN_2161007	GABPB2
15	< 1e-07	< 1e-07	0.178571	87.55	1857.01	0.047	ILMN_1772261	GLG1
156	< 1e-07	< 1e-07	0.178571	88.59	1892.44	0.047	ILMN_1770084	TACC1
302	< 1e-07	< 1e-07	0.178571	92.17	1972.45	0.047	ILMN_1767747	HDAC2
666	< 1e-07	< 1e-07	0.178571	107.71	2306.05	0.047	ILMN_1805842	FHL1
702	< 1e-07	< 1e-07	0.178571	100.76	2137.69	0.047	ILMN_2224143	MCM3
822	< 1e-07	< 1e-07	0.178571	96.47	2047.54	0.047	ILMN_2354381	PON2
171	< 1e-07	< 1e-07	0.178571	90.11	1886.2	0.048	ILMN_2371964	MRPS12
184	< 1e-07	< 1e-07	0.178571	91.9	1934.26	0.048	ILMN_1711878	ENOPH1
217	< 1e-07	< 1e-07	0.178571	94	1942.58	0.048	ILMN_2175465	RSL24D1
375	< 1e-07	< 1e-07	0.178571	90.97	1898.9	0.048	ILMN_1714335	RDH10
525	< 1e-07	< 1e-07	0.178571	97.23	2025.03	0.048	ILMN_1792489	ARPC2
731	< 1e-07	< 1e-07	0.178571	111.48	2335.57	0.048	ILMN_2211950	SRP14P1
770	< 1e-07	< 1e-07	0.178571	108.01	2265.41	0.048	ILMN_3300663	LOC728661
787	< 1e-07	< 1e-07	0.178571	101.72	2118.51	0.048	ILMN_1774584	C2orf28
853	< 1e-07	< 1e-07	0.178571	93.07	1935.89	0.048	ILMN_1678966	SNRPF
1226	1e-07	1.25e-06	0.178571	120.97	2539.96	0.048	ILMN_1679555	TIMM23
1240	1e-07	1.25e-06	0.178571	90.23	1862.49	0.048	ILMN_1760849	NETO2
103	< 1e-07	< 1e-07	0.178571	87.55	1789.48	0.049	ILMN_1771815	C20orf43
116	< 1e-07	< 1e-07	0.178571	86.79	1788.86	0.049	ILMN_1771593	RRM1
209	< 1e-07	< 1e-07	0.178571	89.15	1835.45	0.049	ILMN_2323048	ERP29
402	< 1e-07	< 1e-07	0.178571	94.53	1939.95	0.049	ILMN_1656682	AZIN1
224	< 1e-07	< 1e-07	0.178571	99.42	2004.36	0.05	ILMN_1657283	ALKBH5
538	< 1e-07	< 1e-07	0.178571	94.1	1892.1	0.05	ILMN_1693490	SEC11A
649	< 1e-07	< 1e-07	0.178571	100.02	1999.82	0.05	ILMN_3310491	MIR1978
659	< 1e-07	< 1e-07	0.178571	85.93	1718.46	0.05	ILMN_2367753	ATP2B4
44	< 1e-07	< 1e-07	0.178571	87.36	1712.03	0.051	ILMN_1776102	PSMD10
55	< 1e-07	< 1e-07	0.178571	93.53	1837.49	0.051	ILMN_1662795	CA2
163	< 1e-07	< 1e-07	0.178571	89.9	1767.77	0.051	ILMN_1769810	ARL6IP5
225	< 1e-07	< 1e-07	0.178571	103.4	2013.93	0.051	ILMN_2307883	ATP5J2
623	< 1e-07	< 1e-07	0.178571	85.35	1678.8	0.051	ILMN_2304624	EIF4H
1130	1e-07	1.25e-06	0.178571	94.04	1848.11	0.051	ILMN_1743432	DGUOK
70	< 1e-07	< 1e-07	0.178571	86.89	1679.19	0.052	ILMN_1736814	CLNS1A
150	< 1e-07	< 1e-07	0.178571	98.39	1904.01	0.052	ILMN_1812478	ZNHIT3
259	< 1e-07	< 1e-07	0.178571	99.89	1910.09	0.052	ILMN_1726565	PIK3R2
445	< 1e-07	< 1e-07	0.178571	95.44	1833.66	0.052	ILMN_1694268	HES6
165	< 1e-07	< 1e-07	0.178571	86.44	1634.47	0.053	ILMN_1804327	NAP1L4
689	< 1e-07	< 1e-07	0.178571	94.02	1781.67	0.053	ILMN_1669273	PPT1
8	< 1e-07	< 1e-07	0.178571	91.78	1709.81	0.054	ILMN_1672366	PIGY
39	< 1e-07	< 1e-07	0.178571	103.61	1920.38	0.054	ILMN_2041293	SQLE
47	< 1e-07	< 1e-07	0.178571	87.98	1635.33	0.054	ILMN_2223010	VBP1
130	< 1e-07	< 1e-07	0.178571	79.82	1474.33	0.054	ILMN_1736597	TKT
164	< 1e-07	< 1e-07	0.178571	90.71	1686.89	0.054	ILMN_1750409	RAB9A
196	< 1e-07	< 1e-07	0.178571	107.11	1968.98	0.054	ILMN_1667030	HSBP1
756	< 1e-07	< 1e-07	0.178571	88.09	1623.39	0.054	ILMN_2316806	RWDD1
1114	1e-07	1.25e-06	0.178571	108.47	2010.64	0.054	ILMN_1697469	SFRS6
69	< 1e-07	< 1e-07	0.178571	98.17	1769.34	0.055	ILMN_1699525	SRI
414	< 1e-07	< 1e-07	0.178571	92.47	1683.44	0.055	ILMN_1760256	RBM22
934	< 1e-07	< 1e-07	0.178571	94.45	1720.01	0.055	ILMN_1750101	S100A11
1109	1e-07	1.25e-06	0.178571	100.5	1818.36	0.055	ILMN_1716678	NPC2
43	< 1e-07	< 1e-07	0.178571	94.28	1695.83	0.056	ILMN_1680967	CIP29
93	< 1e-07	< 1e-07	0.178571	91.27	1643.29	0.056	ILMN_2274775	SLC44A4
310	< 1e-07	< 1e-07	0.178571	95.08	1689.18	0.056	ILMN_1797310	ATP6V1D
1197	1e-07	1.25e-06	0.178571	120.58	2158.4	0.056	ILMN_2198376	PSMA4
104	< 1e-07	< 1e-07	0.178571	92.45	1619.93	0.057	ILMN_2213558	TMED10P
317	< 1e-07	< 1e-07	0.178571	101.53	1794.54	0.057	ILMN_3266606	FABP5L2
535	< 1e-07	< 1e-07	0.178571	107.79	1878.44	0.057	ILMN_1722634	NUCB1
536	< 1e-07	< 1e-07	0.178571	87.33	1543.91	0.057	ILMN_2323774	RPAIN
1070	1e-07	1.25e-06	0.178571	94.85	1666.06	0.057	ILMN_1679209	HSPA9
381	< 1e-07	< 1e-07	0.178571	94.55	1621.23	0.058	ILMN_2182482	SHCBP1
790	< 1e-07	< 1e-07	0.178571	96.94	1682.24	0.058	ILMN_2220283	HNRPA1L-2
138	< 1e-07	< 1e-07	0.178571	87.99	1481.19	0.059	ILMN_1733931	PDCD6
200	< 1e-07	< 1e-07	0.178571	86.19	1449.87	0.059	ILMN_1752589	TMEM183A
223	< 1e-07	< 1e-07	0.178571	92.29	1561.77	0.059	ILMN_1672443	QDPR
1248	1e-07	1.25e-06	0.178571	89.3	1524.68	0.059	ILMN_2397484	GJC1
176	< 1e-07	< 1e-07	0.178571	88.54	1479.64	0.06	ILMN_2335718	HNRNPAB
347	< 1e-07	< 1e-07	0.178571	91.12	1529.77	0.06	ILMN_1687921	JMJD8
551	< 1e-07	< 1e-07	0.178571	101.67	1690.97	0.06	ILMN_1662130	LOC730316
996	1e-07	1.25e-06	0.178571	88.07	1461.87	0.06	ILMN_2156267	EIF2AK1
1154	1e-07	1.25e-06	0.178571	129.21	2143.92	0.06	ILMN_1725642	SUMO3
1234	1e-07	1.25e-06	0.178571	97.67	1635.01	0.06	ILMN_2100815	TMEM9B
46	< 1e-07	< 1e-07	0.178571	94.37	1550.17	0.061	ILMN_1771627	ZMIZ1
233	< 1e-07	< 1e-07	0.178571	90.46	1482.66	0.061	ILMN_1758941	REEP5
382	< 1e-07	< 1e-07	0.178571	97.33	1588.97	0.061	ILMN_1797776	PRSS23
500	< 1e-07	< 1e-07	0.178571	96.85	1594.9	0.061	ILMN_1769520	UBE2L6
518	< 1e-07	< 1e-07	0.178571	87.97	1453.64	0.061	ILMN_1768784	PSMC2
560	< 1e-07	< 1e-07	0.178571	87.81	1440.42	0.061	ILMN_1787705	ATP6V1B2
617	< 1e-07	< 1e-07	0.178571	88.91	1465.43	0.061	ILMN_1768127	EBNA1BP2
810	< 1e-07	< 1e-07	0.178571	90.12	1481.49	0.061	ILMN_1783695	EPRS
1113	1e-07	1.25e-06	0.178571	101.25	1661.86	0.061	ILMN_1774823	RPL34
48	< 1e-07	< 1e-07	0.178571	93.02	1500.14	0.062	ILMN_2145518	TMEM126B
78	< 1e-07	< 1e-07	0.178571	90.49	1456.19	0.062	ILMN_2279961	LAMP2
239	< 1e-07	< 1e-07	0.178571	93.51	1498.98	0.062	ILMN_1807994	PCNP
568	< 1e-07	< 1e-07	0.178571	94.64	1519.89	0.062	ILMN_1730622	EVL
576	< 1e-07	< 1e-07	0.178571	111.13	1788.18	0.062	ILMN_1811615	COPA
718	< 1e-07	< 1e-07	0.178571	96.62	1566.06	0.062	ILMN_2216637	STK32B
768	< 1e-07	< 1e-07	0.178571	111.29	1784.04	0.062	ILMN_1800276	RCN1
805	< 1e-07	< 1e-07	0.178571	91.33	1476.57	0.062	ILMN_1719316	TMED3
891	< 1e-07	< 1e-07	0.178571	94.04	1515.57	0.062	ILMN_1746588	TALDO1
51	< 1e-07	< 1e-07	0.178571	91.01	1435.96	0.063	ILMN_1776777	ADAR
418	< 1e-07	< 1e-07	0.178571	92.12	1469.51	0.063	ILMN_1796407	SS18L2
1017	1e-07	1.25e-06	0.178571	1292.34	20573	0.063	ILMN_1792528	LOC401206
1069	1e-07	1.25e-06	0.178571	88.76	1415.49	0.063	ILMN_1809590	GINS2
59	< 1e-07	< 1e-07	0.178571	86.67	1354.32	0.064	ILMN_1765858	CAB39
338	< 1e-07	< 1e-07	0.178571	93.68	1463.36	0.064	ILMN_1779182	TMEM98
571	< 1e-07	< 1e-07	0.178571	94.43	1482.4	0.064	ILMN_2389590	PRKAR1A
809	< 1e-07	< 1e-07	0.178571	88.56	1383.56	0.064	ILMN_1798728	C19orf2
1011	1e-07	1.25e-06	0.178571	90.08	1398.64	0.064	ILMN_1731640	MGC39900
372	< 1e-07	< 1e-07	0.178571	97.13	1484.65	0.065	ILMN_1669394	EI24
467	< 1e-07	< 1e-07	0.178571	100.26	1543.13	0.065	ILMN_2367191	PSMF1
811	< 1e-07	< 1e-07	0.178571	90.76	1392.96	0.065	ILMN_2351638	BEX4
856	< 1e-07	< 1e-07	0.178571	104.61	1608.41	0.065	ILMN_1785330	SH3BP4
865	< 1e-07	< 1e-07	0.178571	94.81	1457.14	0.065	ILMN_1764380	GLTP
871	< 1e-07	< 1e-07	0.178571	104.94	1616.31	0.065	ILMN_1806040	TYMS
1039	1e-07	1.25e-06	0.178571	100.63	1537.51	0.065	ILMN_1684391	PLOD1
189	< 1e-07	< 1e-07	0.178571	94.72	1430.78	0.066	ILMN_2172269	TMEM183B
303	< 1e-07	< 1e-07	0.178571	99.68	1516.92	0.066	ILMN_1697218	MED22
882	< 1e-07	< 1e-07	0.178571	93.93	1423.17	0.066	ILMN_1770732	COPS3
1067	1e-07	1.25e-06	0.178571	94.53	1440.51	0.066	ILMN_1722102	ANAPC11
1131	1e-07	1.25e-06	0.178571	89.49	1365.82	0.066	ILMN_1794165	PGD
149	< 1e-07	< 1e-07	0.178571	83.39	1244.71	0.067	ILMN_1814971	TCF25
442	< 1e-07	< 1e-07	0.178571	107.87	1605.75	0.067	ILMN_1786065	UHRF1
776	< 1e-07	< 1e-07	0.178571	104.75	1564.15	0.067	ILMN_1727194	CALU
823	< 1e-07	< 1e-07	0.178571	101.67	1520.31	0.067	ILMN_1674874	MFSD10
1210	1e-07	1.25e-06	0.178571	107.24	1590.99	0.067	ILMN_1795876	GPS1
118	< 1e-07	< 1e-07	0.178571	86.31	1273.82	0.068	ILMN_1761131	PECI
489	< 1e-07	< 1e-07	0.178571	98.12	1442.81	0.068	ILMN_1655497	EIF4B
786	< 1e-07	< 1e-07	0.178571	92.69	1366.08	0.068	ILMN_1684205	CIB1
1019	1e-07	1.25e-06	0.178571	85.07	1246.49	0.068	ILMN_1739946	VKORC1
296	< 1e-07	< 1e-07	0.178571	91.58	1327.29	0.069	ILMN_1783333	C16orf61
488	< 1e-07	< 1e-07	0.178571	101.09	1457.88	0.069	ILMN_1682694	LOC203547
495	< 1e-07	< 1e-07	0.178571	104.36	1515.24	0.069	ILMN_1809477	CARHSP1
523	< 1e-07	< 1e-07	0.178571	99.38	1431.8	0.069	ILMN_1698307	DBNL
563	< 1e-07	< 1e-07	0.178571	91.61	1332.6	0.069	ILMN_1785170	ARMCX2
849	< 1e-07	< 1e-07	0.178571	89.74	1294.01	0.069	ILMN_3244248	TMEM14D
921	< 1e-07	< 1e-07	0.178571	104.3	1518.96	0.069	ILMN_1671404	SVIL
958	< 1e-07	< 1e-07	0.178571	95.14	1374.06	0.069	ILMN_1729533	APOA1BP
1125	1e-07	1.25e-06	0.178571	99.7	1446.01	0.069	ILMN_1793651	UBE2N
216	< 1e-07	< 1e-07	0.178571	90.42	1293.41	0.07	ILMN_1797933	MRPL17
481	< 1e-07	< 1e-07	0.178571	93.29	1328.46	0.07	ILMN_1786189	MKI67IP
757	< 1e-07	< 1e-07	0.178571	92.12	1324.14	0.07	ILMN_1722276	PAFAH1B1
877	< 1e-07	< 1e-07	0.178571	90.41	1291.77	0.07	ILMN_2341067	NLGN4X
3	< 1e-07	< 1e-07	0.178571	103.05	1441.66	0.071	ILMN_1689774	MRFAP1L1
102	< 1e-07	< 1e-07	0.178571	92.63	1308.29	0.071	ILMN_2369580	C16orf35
109	< 1e-07	< 1e-07	0.178571	83.71	1183.13	0.071	ILMN_2162328	PTS
397	< 1e-07	< 1e-07	0.178571	93.38	1307.06	0.071	ILMN_2128795	LRIG1
507	< 1e-07	< 1e-07	0.178571	99.8	1401.6	0.071	ILMN_1733696	IMP3
569	< 1e-07	< 1e-07	0.178571	102.96	1453.34	0.071	ILMN_2414014	RBM10
697	< 1e-07	< 1e-07	0.178571	107.76	1526.72	0.071	ILMN_2079386	RPL22
1006	1e-07	1.25e-06	0.178571	89.28	1251.55	0.071	ILMN_2311166	ITGB5
77	< 1e-07	< 1e-07	0.178571	87.97	1225.49	0.072	ILMN_1694177	PCNA
79	< 1e-07	< 1e-07	0.178571	100.13	1399.34	0.072	ILMN_2355168	MGST1
262	< 1e-07	< 1e-07	0.178571	84.83	1172.8	0.072	ILMN_1732705	HCFC1
125	< 1e-07	< 1e-07	0.178571	88.82	1216.9	0.073	ILMN_2365544	NHP2
148	< 1e-07	< 1e-07	0.178571	89.11	1226.56	0.073	ILMN_1691181	TMX1
315	< 1e-07	< 1e-07	0.178571	99.23	1363.31	0.073	ILMN_1814859	DDX47
628	< 1e-07	< 1e-07	0.178571	97.58	1333.04	0.073	ILMN_1670379	ANTXR1
680	< 1e-07	< 1e-07	0.178571	105.52	1441.08	0.073	ILMN_3211935	LOC100132715
703	< 1e-07	< 1e-07	0.178571	90.31	1232.27	0.073	ILMN_2049642	RPA1
1059	1e-07	1.25e-06	0.178571	99.67	1365.6	0.073	ILMN_2218208	SPARCL1
5	< 1e-07	< 1e-07	0.178571	91.94	1241.17	0.074	ILMN_1701269	ATP5C1
457	< 1e-07	< 1e-07	0.178571	90.37	1215.06	0.074	ILMN_3243859	NDUFB9
524	< 1e-07	< 1e-07	0.178571	121.35	1635.34	0.074	ILMN_3247645	LOC550643
751	< 1e-07	< 1e-07	0.178571	96.62	1308.67	0.074	ILMN_1746673	2011-09-03
992	1e-07	1.25e-06	0.178571	91.07	1231.43	0.074	ILMN_1715994	HGS
76	< 1e-07	< 1e-07	0.178571	88.43	1178.36	0.075	ILMN_1740742	UROD
111	< 1e-07	< 1e-07	0.178571	92.21	1221.62	0.075	ILMN_1672662	SLC20A1
134	< 1e-07	< 1e-07	0.178571	93.68	1242.16	0.075	ILMN_1705570	H2AFY2
358	< 1e-07	< 1e-07	0.178571	88.99	1191.08	0.075	ILMN_2049343	LOC642947
428	< 1e-07	< 1e-07	0.178571	91.44	1220.22	0.075	ILMN_1710326	CLDND1
642	< 1e-07	< 1e-07	0.178571	93.96	1250.07	0.075	ILMN_1777378	COMMD6
963	< 1e-07	< 1e-07	0.178571	101.83	1365.14	0.075	ILMN_2111187	ELOVL6
136	< 1e-07	< 1e-07	0.178571	88.28	1159.52	0.076	ILMN_1815115	CYC1
517	< 1e-07	< 1e-07	0.178571	111.03	1460.19	0.076	ILMN_1661174	LOC731640
905	< 1e-07	< 1e-07	0.178571	87.42	1150.44	0.076	ILMN_1734486	C1orf19
1082	1e-07	1.25e-06	0.178571	94.46	1239.84	0.076	ILMN_1703477	ARHGEF2
276	< 1e-07	< 1e-07	0.178571	93.5	1209.27	0.077	ILMN_1739798	C7orf30
300	< 1e-07	< 1e-07	0.178571	81.1	1053.72	0.077	ILMN_2180519	LOC729603
355	< 1e-07	< 1e-07	0.178571	88.51	1156.66	0.077	ILMN_1714623	TOMM22
385	< 1e-07	< 1e-07	0.178571	86.99	1133.73	0.077	ILMN_1685258	TMEM14B
779	< 1e-07	< 1e-07	0.178571	88.6	1155.61	0.077	ILMN_1778236	PTPN11
780	< 1e-07	< 1e-07	0.178571	87.67	1139.72	0.077	ILMN_1669550	MAD2L2
833	< 1e-07	< 1e-07	0.178571	85.69	1116.75	0.077	ILMN_1668721	CCND3
906	< 1e-07	< 1e-07	0.178571	98.42	1280.72	0.077	ILMN_3214532	LOC100131205
124	< 1e-07	< 1e-07	0.178571	96.81	1240.08	0.078	ILMN_3227315	LOC729009
354	< 1e-07	< 1e-07	0.178571	90.18	1158.83	0.078	ILMN_1752591	LEPROTL1
371	< 1e-07	< 1e-07	0.178571	85.2	1096.58	0.078	ILMN_2354391	EGLN2
392	< 1e-07	< 1e-07	0.178571	90.13	1158.76	0.078	ILMN_2103295	TINP1
494	< 1e-07	< 1e-07	0.178571	93.27	1184.46	0.079	ILMN_2366634	PKM2
735	< 1e-07	< 1e-07	0.178571	88.16	1109.03	0.079	ILMN_1663002	STOML2
1050	1e-07	1.25e-06	0.178571	98.1	1237.08	0.079	ILMN_1675797	EPDR1
1096	1e-07	1.25e-06	0.178571	98.63	1240.87	0.079	ILMN_1806601	GRSF1
331	< 1e-07	< 1e-07	0.178571	94.59	1184.16	0.08	ILMN_2301624	MACF1
482	< 1e-07	< 1e-07	0.178571	96.24	1200.52	0.08	ILMN_3236481	LOC100129086
613	< 1e-07	< 1e-07	0.178571	107.2	1340.49	0.08	ILMN_1655595	SERPINE2
622	< 1e-07	< 1e-07	0.178571	96.72	1213.08	0.08	ILMN_1803824	ZDHHC9
698	< 1e-07	< 1e-07	0.178571	98.42	1236.95	0.08	ILMN_1815039	C6orf153
1127	1e-07	1.25e-06	0.178571	92.64	1156.27	0.08	ILMN_2401906	CDAN1
376	< 1e-07	< 1e-07	0.178571	91.29	1129.81	0.081	ILMN_1687501	MOXD1
416	< 1e-07	< 1e-07	0.178571	86.69	1074.61	0.081	ILMN_2255310	RPS15A
441	< 1e-07	< 1e-07	0.178571	90.53	1116.61	0.081	ILMN_1792356	DPYSL4
662	< 1e-07	< 1e-07	0.178571	95.84	1185.02	0.081	ILMN_1743911	SLC25A39
774	< 1e-07	< 1e-07	0.178571	90.05	1110.65	0.081	ILMN_1655418	CAPNS1
969	< 1e-07	< 1e-07	0.178571	86.16	1063.55	0.081	ILMN_1777881	TSPAN17
1001	1e-07	1.25e-06	0.178571	94.31	1158.39	0.081	ILMN_1682264	DCAF7
1135	1e-07	1.25e-06	0.178571	112.22	1380.92	0.081	ILMN_2186597	RPP21
9	< 1e-07	< 1e-07	0.178571	88.02	1073.81	0.082	ILMN_2119224	KIFAP3
29	< 1e-07	< 1e-07	0.178571	90.79	1112.84	0.082	ILMN_1747598	PPP1R11
307	< 1e-07	< 1e-07	0.178571	106.96	1311.57	0.082	ILMN_1720442	NCBP2
1046	1e-07	1.25e-06	0.178571	91.7	1120.44	0.082	ILMN_1777663	TOP2B
1169	1e-07	1.25e-06	0.178571	92.62	1132.89	0.082	ILMN_1778457	IL18
122	< 1e-07	< 1e-07	0.178571	94.03	1130.4	0.083	ILMN_1673252	AIMP2
220	< 1e-07	< 1e-07	0.178571	86.96	1051.66	0.083	ILMN_1724504	SETD3
360	< 1e-07	< 1e-07	0.178571	107.1	1291.35	0.083	ILMN_2196097	PPP2CA
883	< 1e-07	< 1e-07	0.178571	94.57	1140.74	0.083	ILMN_3290353	LOC644790
1054	1e-07	1.25e-06	0.178571	92.15	1109.9	0.083	ILMN_1698732	PALLD
1101	1e-07	1.25e-06	0.178571	93.37	1122.96	0.083	ILMN_1690268	HNRPUL1
1178	1e-07	1.25e-06	0.178571	98.8	1188.91	0.083	ILMN_1709307	GPSM1
255	< 1e-07	< 1e-07	0.178571	96.98	1148.93	0.084	ILMN_1693394	BCKDK
449	< 1e-07	< 1e-07	0.178571	97.09	1150.31	0.084	ILMN_2392352	CTPS2
485	< 1e-07	< 1e-07	0.178571	90.88	1076.22	0.084	ILMN_1718132	ECHS1
527	< 1e-07	< 1e-07	0.178571	104.42	1236.2	0.084	ILMN_1814204	C21orf55
748	< 1e-07	< 1e-07	0.178571	97.02	1153.51	0.084	ILMN_1736567	CD74
814	< 1e-07	< 1e-07	0.178571	88.66	1057.26	0.084	ILMN_1753002	RAB2B
885	< 1e-07	< 1e-07	0.178571	91.61	1095.84	0.084	ILMN_1772218	HLA-DPA1
914	< 1e-07	< 1e-07	0.178571	94.53	1131.84	0.084	ILMN_1685824	B4GALT5
944	< 1e-07	< 1e-07	0.178571	109.6	1299.47	0.084	ILMN_1742577	GTPBP4
947	< 1e-07	< 1e-07	0.178571	96.1	1149.71	0.084	ILMN_1683475	TOMM40
1068	1e-07	1.25e-06	0.178571	97.4	1152.93	0.084	ILMN_2352563	CLDND1
42	< 1e-07	< 1e-07	0.178571	95.01	1119.84	0.085	ILMN_1725510	DHCR24
298	< 1e-07	< 1e-07	0.178571	88.78	1042.95	0.085	ILMN_1748770	CKAP5
537	< 1e-07	< 1e-07	0.178571	85.51	1007.35	0.085	ILMN_1779185	CYTSA
650	< 1e-07	< 1e-07	0.178571	98.76	1167.55	0.085	ILMN_1722809	NRCAM
716	< 1e-07	< 1e-07	0.178571	99.41	1172.29	0.085	ILMN_2186061	PFKFB3
981	1e-07	1.25e-06	0.178571	104.95	1239.84	0.085	ILMN_1753582	RPA2
1073	1e-07	1.25e-06	0.178571	89.81	1055.76	0.085	ILMN_1681737	TMSB15A
1103	1e-07	1.25e-06	0.178571	100.11	1180.53	0.085	ILMN_1653028	COL4A1
237	< 1e-07	< 1e-07	0.178571	88.59	1030.02	0.086	ILMN_1654690	CECR5
578	< 1e-07	< 1e-07	0.178571	93.23	1087.6	0.086	ILMN_2199439	CA2
705	< 1e-07	< 1e-07	0.178571	90.81	1057.52	0.086	ILMN_2093027	MYO1B
857	< 1e-07	< 1e-07	0.178571	111.04	1298	0.086	ILMN_1708143	FAM127A
928	< 1e-07	< 1e-07	0.178571	107.27	1251.07	0.086	ILMN_3242105	LOC100134073
132	< 1e-07	< 1e-07	0.178571	87.18	997.01	0.087	ILMN_2041046	CKS1B
141	< 1e-07	< 1e-07	0.178571	97.34	1123.02	0.087	ILMN_1756439	SCRN1
318	< 1e-07	< 1e-07	0.178571	95.05	1089.25	0.087	ILMN_2413158	PODXL
408	< 1e-07	< 1e-07	0.178571	92.9	1068.75	0.087	ILMN_1718672	NHP2
798	< 1e-07	< 1e-07	0.178571	98.37	1125.83	0.087	ILMN_2308849	MYADM
863	< 1e-07	< 1e-07	0.178571	91.19	1051.24	0.087	ILMN_1737988	PRNP
979	1e-07	1.25e-06	0.178571	91.38	1054.27	0.087	ILMN_1806908	PRKCB1
1021	1e-07	1.25e-06	0.178571	86.05	987.2	0.087	ILMN_1692651	PHB
221	< 1e-07	< 1e-07	0.178571	91.13	1032.69	0.088	ILMN_1761242	COMMD1
330	< 1e-07	< 1e-07	0.178571	89.44	1018.59	0.088	ILMN_2307455	UBE2A
443	< 1e-07	< 1e-07	0.178571	100.27	1136.83	0.088	ILMN_2386016	C2orf28
531	< 1e-07	< 1e-07	0.178571	99.06	1123.1	0.088	ILMN_3256478	LOC100129034
715	< 1e-07	< 1e-07	0.178571	90.61	1031.79	0.088	ILMN_1799367	TXNDC14
829	< 1e-07	< 1e-07	0.178571	91.02	1030.08	0.088	ILMN_1738369	TUFM
546	< 1e-07	< 1e-07	0.178571	88.67	994.9	0.089	ILMN_1737146	TRAM1
594	< 1e-07	< 1e-07	0.178571	94.83	1064.59	0.089	ILMN_3227811	LOC729423
602	< 1e-07	< 1e-07	0.178571	94.15	1052.79	0.089	ILMN_1715583	BOP1
35	< 1e-07	< 1e-07	0.178571	89.08	985.64	0.09	ILMN_2056479	TXNL2
113	< 1e-07	< 1e-07	0.178571	92.19	1026.32	0.09	ILMN_1736888	SAR1B
711	< 1e-07	< 1e-07	0.178571	89.4	996.61	0.09	ILMN_2261519	AIRE
795	< 1e-07	< 1e-07	0.178571	88.88	992.57	0.09	ILMN_2217809	TMEM126A
873	< 1e-07	< 1e-07	0.178571	103.63	1154.05	0.09	ILMN_3285153	LOC645979
950	< 1e-07	< 1e-07	0.178571	113.63	1259.35	0.09	ILMN_1793287	LOC642755
1245	1e-07	1.25e-06	0.178571	101.24	1121.26	0.09	ILMN_2116714	SLC39A1
161	< 1e-07	< 1e-07	0.178571	93.72	1024.64	0.091	ILMN_1766981	UNC50
251	< 1e-07	< 1e-07	0.178571	92.92	1021.02	0.091	ILMN_2156982	IMP4
479	< 1e-07	< 1e-07	0.178571	105.69	1165.87	0.091	ILMN_1667050	PRPS1
772	< 1e-07	< 1e-07	0.178571	96.39	1064.5	0.091	ILMN_1652246	KIAA0363
984	1e-07	1.25e-06	0.178571	90.07	990	0.091	ILMN_2189027	LIPG
1044	1e-07	1.25e-06	0.178571	94.11	1033.39	0.091	ILMN_1676563	HTRA1
521	< 1e-07	< 1e-07	0.178571	89.2	966.95	0.092	ILMN_1781097	UBXN4
620	< 1e-07	< 1e-07	0.178571	91.55	990.71	0.092	ILMN_3247462	GLRX3
647	< 1e-07	< 1e-07	0.178571	87.4	951.95	0.092	ILMN_1731181	TEX2
709	< 1e-07	< 1e-07	0.178571	104.9	1138.64	0.092	ILMN_1727309	FAM82A2
890	< 1e-07	< 1e-07	0.178571	109.93	1193.84	0.092	ILMN_1758412	COPS7A
1075	1e-07	1.25e-06	0.178571	88.39	964.17	0.092	ILMN_1768534	BHLHB2
1083	1e-07	1.25e-06	0.178571	87.38	945.02	0.092	ILMN_1714067	NTRK2
1232	1e-07	1.25e-06	0.178571	96.39	1050.71	0.092	ILMN_2410540	CASP2
185	< 1e-07	< 1e-07	0.178571	97.88	1057.25	0.093	ILMN_2098325	C8orf33
510	< 1e-07	< 1e-07	0.178571	109.73	1183.76	0.093	ILMN_1746171	H2AFY
712	< 1e-07	< 1e-07	0.178571	99.74	1076.46	0.093	ILMN_1751803	LSM10
157	< 1e-07	< 1e-07	0.178571	90.71	966.94	0.094	ILMN_1655340	RNF181
334	< 1e-07	< 1e-07	0.178571	91.71	979.35	0.094	ILMN_1783753	TXNDC12
432	< 1e-07	< 1e-07	0.178571	92.86	986.97	0.094	ILMN_2376133	KIAA1191
603	< 1e-07	< 1e-07	0.178571	97.09	1029.8	0.094	ILMN_1685097	ASCC1
320	< 1e-07	< 1e-07	0.178571	100.05	1049.09	0.095	ILMN_1684771	PGRMC1
758	< 1e-07	< 1e-07	0.178571	92.8	972.62	0.095	ILMN_2180929	SLC16A12
841	< 1e-07	< 1e-07	0.178571	86.51	907.72	0.095	ILMN_1776080	GTPBP6
940	< 1e-07	< 1e-07	0.178571	93.51	984.25	0.095	ILMN_1797813	SUZ12
956	< 1e-07	< 1e-07	0.178571	89.3	941.12	0.095	ILMN_1658425	DAG1
198	< 1e-07	< 1e-07	0.178571	90.92	938.98	0.097	ILMN_2360705	ACSL3
1003	1e-07	1.25e-06	0.178571	94.31	968.91	0.097	ILMN_1711270	SFRS14
287	< 1e-07	< 1e-07	0.178571	100.49	1025.01	0.098	ILMN_1775939	SF3B2
826	< 1e-07	< 1e-07	0.178571	103.75	1063.87	0.098	ILMN_3251545	CHMP5
74	< 1e-07	< 1e-07	0.178571	91.21	921.37	0.099	ILMN_2312709	LCMT1
398	< 1e-07	< 1e-07	0.178571	88.6	892.74	0.099	ILMN_2075927	STK40
419	< 1e-07	< 1e-07	0.178571	101.02	1025.45	0.099	ILMN_1728298	SBK1
515	< 1e-07	< 1e-07	0.178571	99.49	1000.39	0.099	ILMN_1719906	HADH
674	< 1e-07	< 1e-07	0.178571	89.05	901.87	0.099	ILMN_1705464	MRPL41
107	< 1e-07	< 1e-07	0.178571	106.76	1036.17	0.1	ILMN_2230672	MRPL18
131	< 1e-07	< 1e-07	0.178571	85.8	821.4	0.1	ILMN_1771333	CD47
153	< 1e-07	< 1e-07	0.178571	92.25	911.32	0.1	ILMN_1687430	EIF2B4
168	< 1e-07	< 1e-07	0.178571	90.3	895.89	0.1	ILMN_1801118	C16orf33
301	< 1e-07	< 1e-07	0.178571	84.03	819.92	0.1	ILMN_1692276	GGPS1
314	< 1e-07	< 1e-07	0.178571	92.72	895.43	0.1	ILMN_2402798	AP2M1
319	< 1e-07	< 1e-07	0.178571	98.76	992.13	0.1	ILMN_2087528	CPSF3
342	< 1e-07	< 1e-07	0.178571	99.05	958.5	0.1	ILMN_1774330	WSCD1
373	< 1e-07	< 1e-07	0.178571	80.26	800.12	0.1	ILMN_1703791	ANXA7
388	< 1e-07	< 1e-07	0.178571	96.51	968.38	0.1	ILMN_1849494
450	< 1e-07	< 1e-07	0.178571	95.37	931.91	0.1	ILMN_2388507	AKT1
480	< 1e-07	< 1e-07	0.178571	87.72	848.88	0.1	ILMN_1805992	KIAA1598
539	< 1e-07	< 1e-07	0.178571	86.22	847.66	0.1	ILMN_1691572	TST
652	< 1e-07	< 1e-07	0.178571	89.01	853.25	0.1	ILMN_1799516	DNAJC9
730	< 1e-07	< 1e-07	0.178571	89.28	888.65	0.1	ILMN_1664921	PPP6C
753	< 1e-07	< 1e-07	0.178571	100.95	966.73	0.1	ILMN_2405018	PPP1CB
933	< 1e-07	< 1e-07	0.178571	84.29	844.66	0.1	ILMN_1654920	HNRPH3
970	< 1e-07	< 1e-07	0.178571	89.79	865.84	0.1	ILMN_1803348	EHBP1
1016	1e-07	1.25e-06	0.178571	83.76	832.06	0.1	ILMN_1794470	ANKFY1
1023	1e-07	1.25e-06	0.178571	95.16	932.42	0.1	ILMN_1740351	KIAA0174
1175	1e-07	1.25e-06	0.178571	89.42	885.64	0.1	ILMN_1729117	COL5A2
1185	1e-07	1.25e-06	0.178571	114.27	1138.12	0.1	ILMN_2318568	HCFC1R1
1192	1e-07	1.25e-06	0.178571	84.47	821.63	0.1	ILMN_1782579	IMMT
126	< 1e-07	< 1e-07	0.178571	93.06	885.36	0.11	ILMN_1692163	NSDHL
175	< 1e-07	< 1e-07	0.178571	97.87	904	0.11	ILMN_3293146	LOC642975
238	< 1e-07	< 1e-07	0.178571	98.2	901.9	0.11	ILMN_1721669	IDH3B
246	< 1e-07	< 1e-07	0.178571	86.96	813.92	0.11	ILMN_1732053	SNRNP70
248	< 1e-07	< 1e-07	0.178571	85.03	771.47	0.11	ILMN_1793118	TAX1BP1
271	< 1e-07	< 1e-07	0.178571	86.98	773.71	0.11	ILMN_1811551	DERA
281	< 1e-07	< 1e-07	0.178571	90.15	789.69	0.11	ILMN_1759513	RND3
377	< 1e-07	< 1e-07	0.178571	94.32	839.86	0.11	ILMN_2380771	AKR1A1
395	< 1e-07	< 1e-07	0.178571	113.81	1060.53	0.11	ILMN_1691425	LDOC1L
423	< 1e-07	< 1e-07	0.178571	91.4	834.65	0.11	ILMN_1761113	GNL2
468	< 1e-07	< 1e-07	0.178571	107.05	1011.86	0.11	ILMN_1779735	C7orf59
469	< 1e-07	< 1e-07	0.178571	89.37	830.65	0.11	ILMN_1761981	FAM96A
509	< 1e-07	< 1e-07	0.178571	98.37	885.14	0.11	ILMN_1706959	TIMM22
533	< 1e-07	< 1e-07	0.178571	88.19	771.77	0.11	ILMN_2395728	HNRPUL1
555	< 1e-07	< 1e-07	0.178571	87.52	773.6	0.11	ILMN_1659766	BAG3
575	< 1e-07	< 1e-07	0.178571	92.77	820.45	0.11	ILMN_2050023	CCDC23
695	< 1e-07	< 1e-07	0.178571	87.84	779.11	0.11	ILMN_1773576	CPNE3
710	< 1e-07	< 1e-07	0.178571	89.71	846.62	0.11	ILMN_1736340	ANGEL2
734	< 1e-07	< 1e-07	0.178571	90.2	826.31	0.11	ILMN_1810289	FER1L3
820	< 1e-07	< 1e-07	0.178571	103.9	932.71	0.11	ILMN_2345872	SUMF2
861	< 1e-07	< 1e-07	0.178571	85.99	762.09	0.11	ILMN_1767337	SFXN5
902	< 1e-07	< 1e-07	0.178571	103.39	901.23	0.11	ILMN_1772713	BMS1
960	< 1e-07	< 1e-07	0.178571	114.01	1007.64	0.11	ILMN_1691892	TAGLN2
975	1e-07	1.25e-06	0.178571	84.52	781.37	0.11	ILMN_2188264	CYR61
1084	1e-07	1.25e-06	0.178571	100.06	923.94	0.11	ILMN_1720344	NIPA2
1092	1e-07	1.25e-06	0.178571	94.86	892.65	0.11	ILMN_1727458	HDAC1
1098	1e-07	1.25e-06	0.178571	96.24	898.44	0.11	ILMN_1761010	PCCB
1105	1e-07	1.25e-06	0.178571	92.76	854.52	0.11	ILMN_1677138	POLR2J3
1157	1e-07	1.25e-06	0.178571	89.37	832.1	0.11	ILMN_1765459	S100A13
1186	1e-07	1.25e-06	0.178571	97.21	868.64	0.11	ILMN_1729453	TSPAN9
1203	1e-07	1.25e-06	0.178571	93.77	875.97	0.11	ILMN_1773389	PLTP
1207	1e-07	1.25e-06	0.178571	96.72	905.4	0.11	ILMN_2407082	2011-09-15
1208	1e-07	1.25e-06	0.178571	88.31	809.76	0.11	ILMN_1805737	PFKP
1212	1e-07	1.25e-06	0.178571	105.81	967.3	0.11	ILMN_1708906	C2orf29
30	< 1e-07	< 1e-07	0.178571	102.84	823.68	0.12	ILMN_1887357
50	< 1e-07	< 1e-07	0.178571	85.72	689.01	0.12	ILMN_2329679	TPST2
80	< 1e-07	< 1e-07	0.178571	94.72	786.85	0.12	ILMN_1756928	RTN1
94	< 1e-07	< 1e-07	0.178571	84.73	732.91	0.12	ILMN_2320888	CXCR4
146	< 1e-07	< 1e-07	0.178571	85.81	693.04	0.12	ILMN_2164081	KLHL12
158	< 1e-07	< 1e-07	0.178571	93.14	754.88	0.12	ILMN_2180352	DIP2B
159	< 1e-07	< 1e-07	0.178571	91.84	773.25	0.12	ILMN_3290380	LOC387703
178	< 1e-07	< 1e-07	0.178571	91.19	769.47	0.12	ILMN_2069945	SNRNP27
199	< 1e-07	< 1e-07	0.178571	91.69	733.58	0.12	ILMN_2227757	PCDHB2
215	< 1e-07	< 1e-07	0.178571	90.99	746.52	0.12	ILMN_1813682	MRPL53
227	< 1e-07	< 1e-07	0.178571	90.79	787.4	0.12	ILMN_1764549	UBE3A
232	< 1e-07	< 1e-07	0.178571	90.28	777.93	0.12	ILMN_1671191	UQCRC1
250	< 1e-07	< 1e-07	0.178571	94.88	795.71	0.12	ILMN_1803312	DIMT1L
254	< 1e-07	< 1e-07	0.178571	88.11	748.53	0.12	ILMN_1727134	KLHDC5
266	< 1e-07	< 1e-07	0.178571	92.28	795.64	0.12	ILMN_1763207	BATF3
273	< 1e-07	< 1e-07	0.178571	91.39	739.32	0.12	ILMN_1724040	ANKRD57
308	< 1e-07	< 1e-07	0.178571	90.46	738.45	0.12	ILMN_1699496	PHF21A
323	< 1e-07	< 1e-07	0.178571	86.82	747.91	0.12	ILMN_1678493	CHN1
379	< 1e-07	< 1e-07	0.178571	111.26	931	0.12	ILMN_1671374	C19orf53
383	< 1e-07	< 1e-07	0.178571	87.56	710.53	0.12	ILMN_1673788	CDV3
387	< 1e-07	< 1e-07	0.178571	95.15	825.32	0.12	ILMN_1666546	DUSP14
437	< 1e-07	< 1e-07	0.178571	85.84	702.16	0.12	ILMN_1760855	OCRL
444	< 1e-07	< 1e-07	0.178571	97.99	837.99	0.12	ILMN_1664466	KLHL9
465	< 1e-07	< 1e-07	0.178571	85.01	735.39	0.12	ILMN_1664833	MRPL50
496	< 1e-07	< 1e-07	0.178571	107.68	863.86	0.12	ILMN_1715647	VANGL2
503	< 1e-07	< 1e-07	0.178571	89.28	728.7	0.12	ILMN_1673704	INA
529	< 1e-07	< 1e-07	0.178571	85.57	684.97	0.12	ILMN_2093500	ZBED5
558	< 1e-07	< 1e-07	0.178571	96.48	799.96	0.12	ILMN_1747771	LOC730744
592	< 1e-07	< 1e-07	0.178571	88.84	756.41	0.12	ILMN_1789507	COL11A1
605	< 1e-07	< 1e-07	0.178571	92.02	795.5	0.12	ILMN_1743049	PWP1
615	< 1e-07	< 1e-07	0.178571	104.07	898.74	0.12	ILMN_2081335	C7orf44
627	< 1e-07	< 1e-07	0.178571	90.07	761.88	0.12	ILMN_2047599	TMEM50B
634	< 1e-07	< 1e-07	0.178571	88.85	715.84	0.12	ILMN_1673604	YIPF3
683	< 1e-07	< 1e-07	0.178571	87.89	734.12	0.12	ILMN_1760858	RAB8A
688	< 1e-07	< 1e-07	0.178571	90.75	732.12	0.12	ILMN_2143148	TM2D1
699	< 1e-07	< 1e-07	0.178571	92.99	781.04	0.12	ILMN_1755727	KDM5B
760	< 1e-07	< 1e-07	0.178571	103.98	898.69	0.12	ILMN_1656837	RBP1
799	< 1e-07	< 1e-07	0.178571	90.38	727.93	0.12	ILMN_1785356	DENND5A
803	< 1e-07	< 1e-07	0.178571	90.98	762.15	0.12	ILMN_1808405	HLA-DQA1
816	< 1e-07	< 1e-07	0.178571	92.25	784.56	0.12	ILMN_1756352	MAPBPIP
838	< 1e-07	< 1e-07	0.178571	105.81	870.74	0.12	ILMN_1690352	ADO
875	< 1e-07	< 1e-07	0.178571	84.27	680.07	0.12	ILMN_2326997	DHPS
955	< 1e-07	< 1e-07	0.178571	92.62	765.33	0.12	ILMN_1683096	ASB1
1124	1e-07	1.25e-06	0.178571	106.05	915.7	0.12	ILMN_1724544	PPP4R1
1126	1e-07	1.25e-06	0.178571	103.05	840.12	0.12	ILMN_2121282	MRPS18B
1147	1e-07	1.25e-06	0.178571	97.38	797.38	0.12	ILMN_1735955	LOC644033
1161	1e-07	1.25e-06	0.178571	101.08	858.97	0.12	ILMN_1760933	RER1
1196	1e-07	1.25e-06	0.178571	105.01	872.9	0.12	ILMN_1653794	C6orf160
72	< 1e-07	< 1e-07	0.178571	90.83	691.32	0.13	ILMN_1676002	QRICH1
73	< 1e-07	< 1e-07	0.178571	98.11	778.12	0.13	ILMN_1699856	RALGDS
75	< 1e-07	< 1e-07	0.178571	86.11	648.46	0.13	ILMN_1729455	EML1
82	< 1e-07	< 1e-07	0.178571	90.13	683.38	0.13	ILMN_1810514	SLC25A44
179	< 1e-07	< 1e-07	0.178571	97.76	775.28	0.13	ILMN_1770733	RIC8A
190	< 1e-07	< 1e-07	0.178571	92.41	686.64	0.13	ILMN_1774547	MPRIP
193	< 1e-07	< 1e-07	0.178571	99.39	739.87	0.13	ILMN_2126038	STMN2
211	< 1e-07	< 1e-07	0.178571	96.31	729.14	0.13	ILMN_3251733	C19orf43
278	< 1e-07	< 1e-07	0.178571	99.63	789.96	0.13	ILMN_1725183	TBCE
321	< 1e-07	< 1e-07	0.178571	92	692.99	0.13	ILMN_1744534	LYRM5
337	< 1e-07	< 1e-07	0.178571	94.04	735.65	0.13	ILMN_1806432	NT5C
341	< 1e-07	< 1e-07	0.178571	91.84	730.12	0.13	ILMN_1722905	MRPS11
364	< 1e-07	< 1e-07	0.178571	85.47	656.14	0.13	ILMN_1815051	API5
394	< 1e-07	< 1e-07	0.178571	97.47	766.07	0.13	ILMN_1671583	MKRN1
409	< 1e-07	< 1e-07	0.178571	91.25	678.77	0.13	ILMN_1717674	PEPD
435	< 1e-07	< 1e-07	0.178571	98.67	737.5	0.13	ILMN_1760741	NDUFA9
514	< 1e-07	< 1e-07	0.178571	89.06	674.34	0.13	ILMN_1749009	REXO2
552	< 1e-07	< 1e-07	0.178571	81.58	606.55	0.13	ILMN_1678140	TTC4
573	< 1e-07	< 1e-07	0.178571	90.23	697.19	0.13	ILMN_2228873	STARD3NL
591	< 1e-07	< 1e-07	0.178571	91.02	706.46	0.13	ILMN_1756220	DDX18
604	< 1e-07	< 1e-07	0.178571	97.7	738.76	0.13	ILMN_1744147	CEBPZ
645	< 1e-07	< 1e-07	0.178571	108.55	836.36	0.13	ILMN_1691376	JAG1
673	< 1e-07	< 1e-07	0.178571	93.26	717.75	0.13	ILMN_1814113	ZFR
694	< 1e-07	< 1e-07	0.178571	92.99	713.01	0.13	ILMN_1815012	EXOC7
700	< 1e-07	< 1e-07	0.178571	105.23	831.71	0.13	ILMN_2305225	NDRG4
789	< 1e-07	< 1e-07	0.178571	94.37	720.08	0.13	ILMN_1666192	DCTN5
791	< 1e-07	< 1e-07	0.178571	91.94	724.97	0.13	ILMN_1757287	MAPK6
808	< 1e-07	< 1e-07	0.178571	92.75	708.38	0.13	ILMN_1732923	SIPA1L2
866	< 1e-07	< 1e-07	0.178571	90.37	689.39	0.13	ILMN_1661485	RBM34
886	< 1e-07	< 1e-07	0.178571	90.64	685.23	0.13	ILMN_1664016	ARHGEF18
887	< 1e-07	< 1e-07	0.178571	92.56	687.99	0.13	ILMN_1756086	INTS3
893	< 1e-07	< 1e-07	0.178571	89.82	675.22	0.13	ILMN_1665510	ERRFI1
896	< 1e-07	< 1e-07	0.178571	90.06	672.23	0.13	ILMN_1703279	CXorf57
897	< 1e-07	< 1e-07	0.178571	101.02	773.21	0.13	ILMN_2406410	RHBDD2
899	< 1e-07	< 1e-07	0.178571	95.43	735.85	0.13	ILMN_3272500	IFI27L1
911	< 1e-07	< 1e-07	0.178571	93.81	714.6	0.13	ILMN_1702396	PACSIN2
924	< 1e-07	< 1e-07	0.178571	87.38	662.81	0.13	ILMN_1738819	EFTUD2
930	< 1e-07	< 1e-07	0.178571	88.95	676.76	0.13	ILMN_1697420	TINF2
942	< 1e-07	< 1e-07	0.178571	86.11	655.2	0.13	ILMN_2098743	THEM2
990	1e-07	1.25e-06	0.178571	91.32	695.05	0.13	ILMN_1665559	CDK2
1087	1e-07	1.25e-06	0.178571	90.51	692.83	0.13	ILMN_1788778	2011-09-11
1134	1e-07	1.25e-06	0.178571	94.95	720.98	0.13	ILMN_2096191	AASDHPPT
1136	1e-07	1.25e-06	0.178571	98.82	741.43	0.13	ILMN_1814369	C21orf62
1145	1e-07	1.25e-06	0.178571	102.38	769.89	0.13	ILMN_1651405	BRD9
1190	1e-07	1.25e-06	0.178571	94.65	724.68	0.13	ILMN_1807211	NICN1
1193	1e-07	1.25e-06	0.178571	90.07	672.85	0.13	ILMN_1724907	NUDT3
1220	1e-07	1.25e-06	0.178571	83.93	638.66	0.13	ILMN_1768582	PPP2CB
1239	1e-07	1.25e-06	0.178571	82.75	656.52	0.13	ILMN_1768176	CXorf26
87	< 1e-07	< 1e-07	0.178571	89.68	657.36	0.14	ILMN_1746686	POLR1C
98	< 1e-07	< 1e-07	0.178571	85.87	597.75	0.14	ILMN_1686750	MGEA5
210	< 1e-07	< 1e-07	0.178571	89.71	629.83	0.14	ILMN_1808779	CSTF3
324	< 1e-07	< 1e-07	0.178571	93.49	671.05	0.14	ILMN_1797735	C1orf21
325	< 1e-07	< 1e-07	0.178571	93.59	686.7	0.14	ILMN_1658472	APH1A
353	< 1e-07	< 1e-07	0.178571	101.39	703.42	0.14	ILMN_1688953	ARHGAP19
380	< 1e-07	< 1e-07	0.178571	98.2	721.52	0.14	ILMN_1750181	TESC
433	< 1e-07	< 1e-07	0.178571	90.51	645.81	0.14	ILMN_1738346	EFHA1
452	< 1e-07	< 1e-07	0.178571	93.76	651.99	0.14	ILMN_1730879	CBY1
474	< 1e-07	< 1e-07	0.178571	110.9	784.34	0.14	ILMN_1696046	SIVA
476	< 1e-07	< 1e-07	0.178571	88.48	619.05	0.14	ILMN_1664931	GTF2E2
512	< 1e-07	< 1e-07	0.178571	85.36	609.89	0.14	ILMN_1702125	HOXB7
530	< 1e-07	< 1e-07	0.178571	92.15	639.02	0.14	ILMN_1693045	TMED1
562	< 1e-07	< 1e-07	0.178571	86.41	606.37	0.14	ILMN_1733511	GOLGA3
653	< 1e-07	< 1e-07	0.178571	89.71	661.54	0.14	ILMN_1705116	C6orf85
713	< 1e-07	< 1e-07	0.178571	101.48	722.09	0.14	ILMN_1766435	WBP11
726	< 1e-07	< 1e-07	0.178571	86.57	605.37	0.14	ILMN_1713380	EIF2B2
828	< 1e-07	< 1e-07	0.178571	110.96	801.86	0.14	ILMN_1735461	DDX21
874	< 1e-07	< 1e-07	0.178571	88.98	618.79	0.14	ILMN_1669508	PAF1
881	< 1e-07	< 1e-07	0.178571	102.27	749.98	0.14	ILMN_3258321	LOC100130932
929	< 1e-07	< 1e-07	0.178571	95.07	681.84	0.14	ILMN_1729123	PPP2R4
936	< 1e-07	< 1e-07	0.178571	86.52	614.72	0.14	ILMN_1746883	SAT2
982	1e-07	1.25e-06	0.178571	87.58	637.34	0.14	ILMN_1709772	SNX5
983	1e-07	1.25e-06	0.178571	89.88	622.06	0.14	ILMN_1691188	UIMC1
1013	1e-07	1.25e-06	0.178571	95.69	681.76	0.14	ILMN_1811238	ALPK2
1034	1e-07	1.25e-06	0.178571	93.81	666.87	0.14	ILMN_1680129	NSUN2
1048	1e-07	1.25e-06	0.178571	95.8	705.49	0.14	ILMN_1772731	HAGH
1090	1e-07	1.25e-06	0.178571	101.25	721.96	0.14	ILMN_2072091	HNRNPUL2
1150	1e-07	1.25e-06	0.178571	91.81	663.97	0.14	ILMN_1752802	CLPTM1L
1199	1e-07	1.25e-06	0.178571	94.75	658.11	0.14	ILMN_1745954	CORO1C
1202	1e-07	1.25e-06	0.178571	90.43	635.35	0.14	ILMN_3243961	ZNF252
1224	1e-07	1.25e-06	0.178571	92.99	688.29	0.14	ILMN_2388155	CASP3
114	< 1e-07	< 1e-07	0.178571	90.86	587.34	0.15	ILMN_2373566	PJA1
120	< 1e-07	< 1e-07	0.178571	89.2	596.17	0.15	ILMN_1721626	ARID5B
172	< 1e-07	< 1e-07	0.178571	89.56	590.08	0.15	ILMN_1748476	NOP58
230	< 1e-07	< 1e-07	0.178571	92.82	600.86	0.15	ILMN_1775744	MRPS16
231	< 1e-07	< 1e-07	0.178571	109.34	728.57	0.15	ILMN_1657483	SEC23B
284	< 1e-07	< 1e-07	0.178571	94.04	636.17	0.15	ILMN_1795026	FAM189B
322	< 1e-07	< 1e-07	0.178571	84.99	560.2	0.15	ILMN_1659285	PSMG1
386	< 1e-07	< 1e-07	0.178571	87.68	594.33	0.15	ILMN_2324998	NGDN
492	< 1e-07	< 1e-07	0.178571	89.6	579.44	0.15	ILMN_2355462	CYFIP1
498	< 1e-07	< 1e-07	0.178571	101.46	696.08	0.15	ILMN_1688526	ARL5A
601	< 1e-07	< 1e-07	0.178571	87.19	589.84	0.15	ILMN_1764410	C22orf13
651	< 1e-07	< 1e-07	0.178571	92.42	607.63	0.15	ILMN_1661491	SH3GL2
670	< 1e-07	< 1e-07	0.178571	94.52	613.08	0.15	ILMN_2339202	KTN1
707	< 1e-07	< 1e-07	0.178571	101.22	659.83	0.15	ILMN_1775330	C15orf52
724	< 1e-07	< 1e-07	0.178571	94.22	646.67	0.15	ILMN_1738656	GLOD4
815	< 1e-07	< 1e-07	0.178571	92.01	597.73	0.15	ILMN_1716583	NME7
842	< 1e-07	< 1e-07	0.178571	106.74	711.04	0.15	ILMN_1764043	TTL
844	< 1e-07	< 1e-07	0.178571	90.53	609.24	0.15	ILMN_1657977	MSRB2
864	< 1e-07	< 1e-07	0.178571	85.41	571.64	0.15	ILMN_1790136	C20orf20
915	< 1e-07	< 1e-07	0.178571	98.39	659.08	0.15	ILMN_1718706	ERAL1
945	< 1e-07	< 1e-07	0.178571	87.15	565.7	0.15	ILMN_1739222	ETV5
999	1e-07	1.25e-06	0.178571	105.59	712.54	0.15	ILMN_1706873	RPL34
1008	1e-07	1.25e-06	0.178571	92.07	613.27	0.15	ILMN_2103720	MRPL15
1025	1e-07	1.25e-06	0.178571	96.33	633.21	0.15	ILMN_2056167	OSTC
1104	1e-07	1.25e-06	0.178571	89.39	613.96	0.15	ILMN_1679134	NSMCE4A
1142	1e-07	1.25e-06	0.178571	91.06	605.32	0.15	ILMN_1669206	CNOT1
1200	1e-07	1.25e-06	0.178571	83.75	563.47	0.15	ILMN_1715569	CCDC53
1214	1e-07	1.25e-06	0.178571	87.28	599.99	0.15	ILMN_1655163	STK24
1225	1e-07	1.25e-06	0.178571	94.04	630.33	0.15	ILMN_2285817	FAM89A
1242	1e-07	1.25e-06	0.178571	90.23	607.5	0.15	ILMN_2176768	SEPHS1
1247	1e-07	1.25e-06	0.178571	102.81	678.1	0.15	ILMN_1712888	HSPH1
25	< 1e-07	< 1e-07	0.178571	87.48	556.55	0.16	ILMN_1660292	MRPS21
97	< 1e-07	< 1e-07	0.178571	93.12	574.32	0.16	ILMN_1702806	PDCL3
207	< 1e-07	< 1e-07	0.178571	88.49	536.6	0.16	ILMN_1708328	RAB11FIP3
208	< 1e-07	< 1e-07	0.178571	94.43	585.85	0.16	ILMN_1779886	TBC1D14
268	< 1e-07	< 1e-07	0.178571	91.12	553	0.16	ILMN_2152429	C12orf76
362	< 1e-07	< 1e-07	0.178571	90.83	554.77	0.16	ILMN_2375002	MAP4K4
368	< 1e-07	< 1e-07	0.178571	88.91	545.19	0.16	ILMN_2364357	RPS6KB2
499	< 1e-07	< 1e-07	0.178571	91.87	578.95	0.16	ILMN_1713759	UBE2J1
519	< 1e-07	< 1e-07	0.178571	87.2	560.84	0.16	ILMN_1770206	GEMIN4
570	< 1e-07	< 1e-07	0.178571	86	548.02	0.16	ILMN_1717056	TXNRD1
625	< 1e-07	< 1e-07	0.178571	97.98	599.3	0.16	ILMN_1787844	C19orf10
644	< 1e-07	< 1e-07	0.178571	97.46	593.97	0.16	ILMN_2177090	LOC200030
669	< 1e-07	< 1e-07	0.178571	96	614.59	0.16	ILMN_1663399	TIMP4
690	< 1e-07	< 1e-07	0.178571	102.04	625.09	0.16	ILMN_1792660	CAMSAP1L1
762	< 1e-07	< 1e-07	0.178571	98.15	601.1	0.16	ILMN_1768867	AP3B1
825	< 1e-07	< 1e-07	0.178571	89.85	569.06	0.16	ILMN_1797342	FNBP1
832	< 1e-07	< 1e-07	0.178571	90.67	564.76	0.16	ILMN_1791912	SIDT2
913	< 1e-07	< 1e-07	0.178571	90.1	551.64	0.16	ILMN_3241469	LOC100134537
943	< 1e-07	< 1e-07	0.178571	84.59	533.55	0.16	ILMN_1670807	FAM84B
976	1e-07	1.25e-06	0.178571	90.35	577.91	0.16	ILMN_1703471	ATF6
1037	1e-07	1.25e-06	0.178571	90.01	574.15	0.16	ILMN_1769299	MTMR11
1051	1e-07	1.25e-06	0.178571	97.94	593.85	0.16	ILMN_1721657	RSU1
1077	1e-07	1.25e-06	0.178571	88.75	563.07	0.16	ILMN_2197946	SCG3
1140	1e-07	1.25e-06	0.178571	90.54	567.52	0.16	ILMN_1745079	TRIM2
1141	1e-07	1.25e-06	0.178571	92.23	577.56	0.16	ILMN_1812926	ANTXR2
1172	1e-07	1.25e-06	0.178571	99.95	615.79	0.16	ILMN_2377240	AKTIP
1219	1e-07	1.25e-06	0.178571	88.35	538.74	0.16	ILMN_2346573	PSME3
1221	1e-07	1.25e-06	0.178571	101.63	650.9	0.16	ILMN_1708147	TBPL1
1227	1e-07	1.25e-06	0.178571	95.48	592.35	0.16	ILMN_2318011	PSMA3
1238	1e-07	1.25e-06	0.178571	95.08	585.99	0.16	ILMN_2077905	PTGFRN
152	< 1e-07	< 1e-07	0.178571	83.23	490.65	0.17	ILMN_1756572	COQ2
183	< 1e-07	< 1e-07	0.178571	93.12	538.98	0.17	ILMN_3214052	LOC644877
258	< 1e-07	< 1e-07	0.178571	94.48	565.04	0.17	ILMN_1751572	TLE1
261	< 1e-07	< 1e-07	0.178571	89.36	534.18	0.17	ILMN_1770850	PNMA1
274	< 1e-07	< 1e-07	0.178571	110.81	642.12	0.17	ILMN_2091123	HCG2P7
292	< 1e-07	< 1e-07	0.178571	88.96	531.08	0.17	ILMN_1725594	FAM188A
294	< 1e-07	< 1e-07	0.178571	96.56	558.9	0.17	ILMN_1795911	TTC37
306	< 1e-07	< 1e-07	0.178571	96.4	556.64	0.17	ILMN_1795991	C22orf28
344	< 1e-07	< 1e-07	0.178571	81.35	483.85	0.17	ILMN_2188204	ATG12
367	< 1e-07	< 1e-07	0.178571	88	512.84	0.17	ILMN_1780987	RFXANK
369	< 1e-07	< 1e-07	0.178571	104.16	595.26	0.17	ILMN_1772798	ARPP19
413	< 1e-07	< 1e-07	0.178571	90.32	544.29	0.17	ILMN_1718610	ARHGAP17
502	< 1e-07	< 1e-07	0.178571	84.59	499.16	0.17	ILMN_1713688	DHX32
549	< 1e-07	< 1e-07	0.178571	102.35	616.75	0.17	ILMN_1838313
597	< 1e-07	< 1e-07	0.178571	91.1	523.33	0.17	ILMN_1801941	C1orf50
609	< 1e-07	< 1e-07	0.178571	103.98	607.29	0.17	ILMN_2209748	DERL1
629	< 1e-07	< 1e-07	0.178571	100.58	577.46	0.17	ILMN_1716407	SORBS2
655	< 1e-07	< 1e-07	0.178571	96.24	556.13	0.17	ILMN_1707503	C1orf144
671	< 1e-07	< 1e-07	0.178571	95.39	566.25	0.17	ILMN_2191436	POLA1
676	< 1e-07	< 1e-07	0.178571	100.72	592.15	0.17	ILMN_3290100	LOC645157
793	< 1e-07	< 1e-07	0.178571	90.21	520.2	0.17	ILMN_1671554	LPIN1
797	< 1e-07	< 1e-07	0.178571	100.95	606.57	0.17	ILMN_3306997	METTL1
824	< 1e-07	< 1e-07	0.178571	88.85	534.48	0.17	ILMN_2126344	SEC16A
845	< 1e-07	< 1e-07	0.178571	92	533.24	0.17	ILMN_1663954	TH1L
876	< 1e-07	< 1e-07	0.178571	109.84	630.05	0.17	ILMN_2387471	FLJ22184
952	< 1e-07	< 1e-07	0.178571	97.84	563.82	0.17	ILMN_1688000	POLDIP3
978	1e-07	1.25e-06	0.178571	87.52	504.11	0.17	ILMN_2054392	PPIL1
985	1e-07	1.25e-06	0.178571	97.23	581.8	0.17	ILMN_2105308	DPM1
987	1e-07	1.25e-06	0.178571	94.26	553.27	0.17	ILMN_1807044	UBAC1
1024	1e-07	1.25e-06	0.178571	96.46	564.31	0.17	ILMN_1761120	TM2D3
1047	1e-07	1.25e-06	0.178571	91.9	542.2	0.17	ILMN_1765796	ENO2
1116	1e-07	1.25e-06	0.178571	87.7	511.86	0.17	ILMN_1761844	ZCCHC17
1117	1e-07	1.25e-06	0.178571	85.5	500.16	0.17	ILMN_2082810	BRD7
1170	1e-07	1.25e-06	0.178571	85.75	491.99	0.17	ILMN_1748650	MRPL45
1173	1e-07	1.25e-06	0.178571	87.32	502.59	0.17	ILMN_2396648	EXOSC1
1183	1e-07	1.25e-06	0.178571	92.03	534.28	0.17	ILMN_1769671	RYK
1223	1e-07	1.25e-06	0.178571	89	534.36	0.17	ILMN_1736234	C1orf77
1235	1e-07	1.25e-06	0.178571	90.65	536.14	0.17	ILMN_2373779	COPS8
133	< 1e-07	< 1e-07	0.178571	93.9	511.69	0.18	ILMN_1664216	NKIRAS1
144	< 1e-07	< 1e-07	0.178571	89.53	490.63	0.18	ILMN_1658995	ACOT9
167	< 1e-07	< 1e-07	0.178571	93.13	514.22	0.18	ILMN_1793743	DIRC2
213	< 1e-07	< 1e-07	0.178571	88.09	497.9	0.18	ILMN_1739876	RAB3GAP1
241	< 1e-07	< 1e-07	0.178571	88.11	499.96	0.18	ILMN_1756898	COQ9
252	< 1e-07	< 1e-07	0.178571	90.13	507.51	0.18	ILMN_1733937	MMD
366	< 1e-07	< 1e-07	0.178571	87.42	495.96	0.18	ILMN_1769451	ILVBL
436	< 1e-07	< 1e-07	0.178571	88.06	479.27	0.18	ILMN_2041190	F2RL1
781	< 1e-07	< 1e-07	0.178571	88.25	480.15	0.18	ILMN_1788783	TRAM2
784	< 1e-07	< 1e-07	0.178571	97.28	546.64	0.18	ILMN_3245517	LOC100134273
796	< 1e-07	< 1e-07	0.178571	98.86	544.87	0.18	ILMN_2395856	TMEM218
878	< 1e-07	< 1e-07	0.178571	85.07	465.38	0.18	ILMN_1697440	PRPF4
894	< 1e-07	< 1e-07	0.178571	94.33	512.51	0.18	ILMN_1677385	C8orf40
912	< 1e-07	< 1e-07	0.178571	87.78	499.79	0.18	ILMN_1732089	MRI1
919	< 1e-07	< 1e-07	0.178571	90.89	492.07	0.18	ILMN_2306565	MTX2
926	< 1e-07	< 1e-07	0.178571	90.69	510.31	0.18	ILMN_2330861	SMC4
931	< 1e-07	< 1e-07	0.178571	98.2	547.71	0.18	ILMN_2061732	YRDC
997	1e-07	1.25e-06	0.178571	84.66	477.94	0.18	ILMN_1797522	DUSP3
1129	1e-07	1.25e-06	0.178571	100.24	570.57	0.18	ILMN_2352131	ERBB2
1244	1e-07	1.25e-06	0.178571	87.37	483.79	0.18	ILMN_2316540	MRPL11
100	< 1e-07	< 1e-07	0.178571	96.49	501.5	0.19	ILMN_1773073	PHYH
195	< 1e-07	< 1e-07	0.178571	91.62	494.51	0.19	ILMN_2392635	ABCF1
228	< 1e-07	< 1e-07	0.178571	95.71	498.67	0.19	ILMN_1781454	RAE1
290	< 1e-07	< 1e-07	0.178571	94.21	496.51	0.19	ILMN_1676026	MRPS26
316	< 1e-07	< 1e-07	0.178571	92.94	493.27	0.19	ILMN_1686097	TOP2A
356	< 1e-07	< 1e-07	0.178571	98.31	517.2	0.19	ILMN_3243156	AHNAK2
384	< 1e-07	< 1e-07	0.178571	90.54	477.51	0.19	ILMN_1694759	C19orf42
448	< 1e-07	< 1e-07	0.178571	92.34	498.98	0.19	ILMN_1700518	HMGN4
545	< 1e-07	< 1e-07	0.178571	90.84	474.35	0.19	ILMN_1701558	MAP1A
554	< 1e-07	< 1e-07	0.178571	98.96	518.24	0.19	ILMN_1695370	LOC645968
572	< 1e-07	< 1e-07	0.178571	90.47	480.48	0.19	ILMN_2406043	VPS24
586	< 1e-07	< 1e-07	0.178571	85.5	449.84	0.19	ILMN_1744912	CTTN
686	< 1e-07	< 1e-07	0.178571	99.17	516.39	0.19	ILMN_1809027	ATP5SL
765	< 1e-07	< 1e-07	0.178571	89.48	470.77	0.19	ILMN_2157951	STX6
813	< 1e-07	< 1e-07	0.178571	87.77	472.88	0.19	ILMN_1681590	LARP1
872	< 1e-07	< 1e-07	0.178571	94.09	487.74	0.19	ILMN_2202481	UBLCP1
964	< 1e-07	< 1e-07	0.178571	87.34	459.59	0.19	ILMN_1676846	ABCE1
1064	1e-07	1.25e-06	0.178571	90.95	489.69	0.19	ILMN_1781906	RBM17
1085	1e-07	1.25e-06	0.178571	92.59	496.34	0.19	ILMN_1759023	WFS1
1156	1e-07	1.25e-06	0.178571	95.23	507.82	0.19	ILMN_2356031	RNF121
1191	1e-07	1.25e-06	0.178571	86.95	466.5	0.19	ILMN_1745994	GAS7
1211	1e-07	1.25e-06	0.178571	94.7	502.83	0.19	ILMN_1730568	ZDHHC7
206	< 1e-07	< 1e-07	0.178571	89.42	450.62	0.2	ILMN_1670561	TCEAL8
267	< 1e-07	< 1e-07	0.178571	87.14	441.33	0.2	ILMN_1667561	IFRD1
282	< 1e-07	< 1e-07	0.178571	95.13	466.49	0.2	ILMN_2072140	BTF3L4
493	< 1e-07	< 1e-07	0.178571	87.39	438.4	0.2	ILMN_1758626	IDS
504	< 1e-07	< 1e-07	0.178571	86.89	424.62	0.2	ILMN_1696065	SDF4
542	< 1e-07	< 1e-07	0.178571	92.1	455.83	0.2	ILMN_1783285	CTPS
548	< 1e-07	< 1e-07	0.178571	90.95	451.2	0.2	ILMN_2288784	CCDC34
556	< 1e-07	< 1e-07	0.178571	90.08	451.22	0.2	ILMN_1692168	UBE2Z
577	< 1e-07	< 1e-07	0.178571	85.12	416.69	0.2	ILMN_1658619	WWC1
589	< 1e-07	< 1e-07	0.178571	97.45	495.37	0.2	ILMN_1662318	CCDC59
682	< 1e-07	< 1e-07	0.178571	92.31	468.97	0.2	ILMN_1722838	MRPL46
691	< 1e-07	< 1e-07	0.178571	93.29	459.17	0.2	ILMN_1770678	CBX2
696	< 1e-07	< 1e-07	0.178571	92.16	454.52	0.2	ILMN_2216852	PGK1
706	< 1e-07	< 1e-07	0.178571	96.13	470.98	0.2	ILMN_1747775	STX2
744	< 1e-07	< 1e-07	0.178571	96.88	495.59	0.2	ILMN_2381476	SPG3A
769	< 1e-07	< 1e-07	0.178571	84.44	422.5	0.2	ILMN_1788689	PHIP
801	< 1e-07	< 1e-07	0.178571	99.97	490.38	0.2	ILMN_1727332	ATPIF1
835	< 1e-07	< 1e-07	0.178571	86.74	423.74	0.2	ILMN_2300396	COMMD5
847	< 1e-07	< 1e-07	0.178571	103.87	530.9	0.2	ILMN_1703697	LANCL1
920	< 1e-07	< 1e-07	0.178571	92.82	467.48	0.2	ILMN_1664750	TMBIM4
951	< 1e-07	< 1e-07	0.178571	88.46	449.43	0.2	ILMN_1715607	CHMP4A
968	< 1e-07	< 1e-07	0.178571	97.2	488.43	0.2	ILMN_2228180	MSRA
1014	1e-07	1.25e-06	0.178571	92.81	468.56	0.2	ILMN_1659936	PPP1R15A
1026	1e-07	1.25e-06	0.178571	92.59	465.34	0.2	ILMN_1673962	NUP205
1060	1e-07	1.25e-06	0.178571	95.61	472.28	0.2	ILMN_2325234	PQBP1
1071	1e-07	1.25e-06	0.178571	99	497.09	0.2	ILMN_1652521	MTMR9
1099	1e-07	1.25e-06	0.178571	89.55	453.65	0.2	ILMN_1651799	SLC38A2
1121	1e-07	1.25e-06	0.178571	96.06	491.1	0.2	ILMN_2214603	PPP2R3C
1201	1e-07	1.25e-06	0.178571	95.41	466.31	0.2	ILMN_1665004	CASC3
1213	1e-07	1.25e-06	0.178571	100.22	506.27	0.2	ILMN_1792138	UQCRH
58	< 1e-07	< 1e-07	0.178571	84.51	397.66	0.21	ILMN_2316236	HOPX
139	< 1e-07	< 1e-07	0.178571	91.06	436.21	0.21	ILMN_1739521	NLGN1
247	< 1e-07	< 1e-07	0.178571	99.95	487.01	0.21	ILMN_1654609	TIGA1
289	< 1e-07	< 1e-07	0.178571	85.18	398.6	0.21	ILMN_2374159	HERPUD1
407	< 1e-07	< 1e-07	0.178571	92.43	440.71	0.21	ILMN_1738558	RGS20
424	< 1e-07	< 1e-07	0.178571	97.23	467.49	0.21	ILMN_1696713	POLA2
579	< 1e-07	< 1e-07	0.178571	85.6	406.52	0.21	ILMN_1676946	AP3M2
583	< 1e-07	< 1e-07	0.178571	91.6	438.22	0.21	ILMN_1806106	GNL3
607	< 1e-07	< 1e-07	0.178571	85.53	406.6	0.21	ILMN_1711069	YPEL5
630	< 1e-07	< 1e-07	0.178571	92.2	445.97	0.21	ILMN_1686194	SDCCAG10
636	< 1e-07	< 1e-07	0.178571	106.07	515.52	0.21	ILMN_2097858	KIAA1737
654	< 1e-07	< 1e-07	0.178571	90.74	442.41	0.21	ILMN_1742578	MKLN1
661	< 1e-07	< 1e-07	0.178571	85.4	414.99	0.21	ILMN_1667068	ZC3HAV1
693	< 1e-07	< 1e-07	0.178571	84.42	397.51	0.21	ILMN_1723414	HACL1
725	< 1e-07	< 1e-07	0.178571	89.69	424.28	0.21	ILMN_3301740	LOC729887
817	< 1e-07	< 1e-07	0.178571	90.72	435.95	0.21	ILMN_1716053	AK2
884	< 1e-07	< 1e-07	0.178571	87.21	423.81	0.21	ILMN_1804642	SMUG1
938	< 1e-07	< 1e-07	0.178571	91.98	427.98	0.21	ILMN_1725071	CCDC12
966	< 1e-07	< 1e-07	0.178571	84.97	406.17	0.21	ILMN_1759184	C19orf48
986	1e-07	1.25e-06	0.178571	89.25	422.33	0.21	ILMN_1803811	TRIB1
993	1e-07	1.25e-06	0.178571	92.5	439.92	0.21	ILMN_2347349	CCNB1IP1
1007	1e-07	1.25e-06	0.178571	90.26	430.1	0.21	ILMN_1807596	UBAP1
1080	1e-07	1.25e-06	0.178571	88.63	419.7	0.21	ILMN_1655990	CDK5RAP2
1095	1e-07	1.25e-06	0.178571	88.1	424.37	0.21	ILMN_1748926	TMEM209
1108	1e-07	1.25e-06	0.178571	101.76	495.65	0.21	ILMN_1746704	TRIM8
1177	1e-07	1.25e-06	0.178571	101.58	484.46	0.21	ILMN_2334350	BTBD3
1206	1e-07	1.25e-06	0.178571	91.32	427.18	0.21	ILMN_1784661	TMEM2
1209	1e-07	1.25e-06	0.178571	96.41	449.25	0.21	ILMN_3304555	LOC728324
1249	1e-07	1.25e-06	0.178571	95.91	447.95	0.21	ILMN_2057573	FAM62B
393	< 1e-07	< 1e-07	0.178571	96.55	429.77	0.22	ILMN_1698463	ILF3
656	< 1e-07	< 1e-07	0.178571	90.33	406.55	0.22	ILMN_2397721	GLB1
668	< 1e-07	< 1e-07	0.178571	91.12	405.24	0.22	ILMN_1660749	ASPSCR1
743	< 1e-07	< 1e-07	0.178571	95.7	427.19	0.22	ILMN_1767542	THAP10
819	< 1e-07	< 1e-07	0.178571	92.81	427.53	0.22	ILMN_1721704	FNTA
858	< 1e-07	< 1e-07	0.178571	91.09	422.66	0.22	ILMN_1658678	SAAL1
869	< 1e-07	< 1e-07	0.178571	96.74	430.69	0.22	ILMN_3263329	GAR1
870	< 1e-07	< 1e-07	0.178571	92.02	427.62	0.22	ILMN_1740169	TYRO3
1027	1e-07	1.25e-06	0.178571	88.52	404.01	0.22	ILMN_2194649	TADA1L
1033	1e-07	1.25e-06	0.178571	95.24	439.33	0.22	ILMN_1668090	STK25
1058	1e-07	1.25e-06	0.178571	95.11	427.42	0.22	ILMN_2336186	LCMT1
1165	1e-07	1.25e-06	0.178571	92.85	427.2	0.22	ILMN_1714167	CYB5A
1241	1e-07	1.25e-06	0.178571	90.64	421.18	0.22	ILMN_1797277	KIF3C
115	< 1e-07	< 1e-07	0.178571	89.94	387.44	0.23	ILMN_1769245	GLIPR1
235	< 1e-07	< 1e-07	0.178571	112.13	482.63	0.23	ILMN_1713892	C4orf34
399	< 1e-07	< 1e-07	0.178571	86.94	385.99	0.23	ILMN_1725312	RASA1
412	< 1e-07	< 1e-07	0.178571	90.05	400.19	0.23	ILMN_1788607	RPL23A
431	< 1e-07	< 1e-07	0.178571	94.36	416.84	0.23	ILMN_1761969	DERL2
544	< 1e-07	< 1e-07	0.178571	94.77	406.47	0.23	ILMN_3244583	NCRNA00219
610	< 1e-07	< 1e-07	0.178571	88.4	391.92	0.23	ILMN_1811997	ZNF364
778	< 1e-07	< 1e-07	0.178571	95.29	407.21	0.23	ILMN_1653292	PFKFB4
800	< 1e-07	< 1e-07	0.178571	86.01	373.87	0.23	ILMN_1807016	LHX2
843	< 1e-07	< 1e-07	0.178571	107.45	468.05	0.23	ILMN_1700276	C14orf100
923	< 1e-07	< 1e-07	0.178571	87.33	381.69	0.23	ILMN_1787762	HEATR1
1049	1e-07	1.25e-06	0.178571	95.5	414.4	0.23	ILMN_1656560	PARM1
1063	1e-07	1.25e-06	0.178571	91.22	402.57	0.23	ILMN_1791388	ZNF787
1181	1e-07	1.25e-06	0.178571	105.83	451.54	0.23	ILMN_1763540	PSME4
1195	1e-07	1.25e-06	0.178571	98.02	434.7	0.23	ILMN_1786697	TRIM9
202	< 1e-07	< 1e-07	0.178571	87.18	362.94	0.24	ILMN_1720114	GMNN
593	< 1e-07	< 1e-07	0.178571	97.49	407.23	0.24	ILMN_1768510	MAN2B2
848	< 1e-07	< 1e-07	0.178571	87.78	363.66	0.24	ILMN_2151056	C10orf32
901	< 1e-07	< 1e-07	0.178571	92.19	390.35	0.24	ILMN_1793203	SMCR7L
972	< 1e-07	< 1e-07	0.178571	89.77	367.54	0.24	ILMN_1716875	CTNND2
1010	1e-07	1.25e-06	0.178571	85.19	355.89	0.24	ILMN_2129388	FAM190B
1055	1e-07	1.25e-06	0.178571	91.12	381.01	0.24	ILMN_1785179	UBE2G2
205	< 1e-07	< 1e-07	0.178571	92.94	373.6	0.25	ILMN_1778238	UTP6
378	< 1e-07	< 1e-07	0.178571	89.13	352.63	0.25	ILMN_2374778	DUT
490	< 1e-07	< 1e-07	0.178571	92.15	366.98	0.25	ILMN_1772316	UNC84A
550	< 1e-07	< 1e-07	0.178571	90.74	366.81	0.25	ILMN_2051232	SDHA
714	< 1e-07	< 1e-07	0.178571	89.94	357.02	0.25	ILMN_1773855	CPT1C
747	< 1e-07	< 1e-07	0.178571	89.19	360.77	0.25	ILMN_1668484	LRRC47
925	< 1e-07	< 1e-07	0.178571	95.27	373.74	0.25	ILMN_2126957	NOMO1
954	< 1e-07	< 1e-07	0.178571	92.29	370.35	0.25	ILMN_2058512	PSMA2
1009	1e-07	1.25e-06	0.178571	92.99	368.41	0.25	ILMN_2155172	BRIX1
1053	1e-07	1.25e-06	0.178571	94.25	384.28	0.25	ILMN_1804448	MSI2
1062	1e-07	1.25e-06	0.178571	91.55	363.75	0.25	ILMN_1680130	DYM
1079	1e-07	1.25e-06	0.178571	98.1	390.14	0.25	ILMN_1763265	CHMP1B
1146	1e-07	1.25e-06	0.178571	91.34	372.6	0.25	ILMN_1724293	KDELR2
1204	1e-07	1.25e-06	0.178571	88.93	356.82	0.25	ILMN_1800164	PPFIA1
336	< 1e-07	< 1e-07	0.178571	93.37	360.97	0.26	ILMN_1760400	C8orf41
389	< 1e-07	< 1e-07	0.178571	92.73	350.85	0.26	ILMN_1734929	BBOX1
585	< 1e-07	< 1e-07	0.178571	89.48	341.59	0.26	ILMN_1651385	MFN2
665	< 1e-07	< 1e-07	0.178571	89.1	348.63	0.26	ILMN_1727271	WARS
667	< 1e-07	< 1e-07	0.178571	88.21	341.56	0.26	ILMN_2358652	NXF1
745	< 1e-07	< 1e-07	0.178571	91.96	351.72	0.26	ILMN_3199974	LOC100131787
782	< 1e-07	< 1e-07	0.178571	87.88	332.57	0.26	ILMN_1655329	RIOK2
903	< 1e-07	< 1e-07	0.178571	87.81	341.51	0.26	ILMN_1664922	FLNB
927	< 1e-07	< 1e-07	0.178571	92	350.87	0.26	ILMN_1802973	ANAPC4
932	< 1e-07	< 1e-07	0.178571	85.63	324.07	0.26	ILMN_1766245	SUPT4H1
1004	1e-07	1.25e-06	0.178571	93.47	359.53	0.26	ILMN_1686748	TMEM9
1038	1e-07	1.25e-06	0.178571	88.96	343.63	0.26	ILMN_1673023	EP400
1042	1e-07	1.25e-06	0.178571	97.29	374.02	0.26	ILMN_1773247	ZNF410
1097	1e-07	1.25e-06	0.178571	90.23	341.73	0.26	ILMN_1783728	TBRG4
1233	1e-07	1.25e-06	0.178571	93.63	357.78	0.26	ILMN_1815346	TMEM136
466	< 1e-07	< 1e-07	0.178571	93.17	347.11	0.27	ILMN_1712751	HADHA
732	< 1e-07	< 1e-07	0.178571	89.77	332.21	0.27	ILMN_1656316	ZMYM3
766	< 1e-07	< 1e-07	0.178571	102.52	384.12	0.27	ILMN_3249608	ANKLE2
783	< 1e-07	< 1e-07	0.178571	100.66	374.74	0.27	ILMN_2366719	NSFL1C
935	< 1e-07	< 1e-07	0.178571	105.02	387.74	0.27	ILMN_1674302	PPAT
971	< 1e-07	< 1e-07	0.178571	95.29	349.34	0.27	ILMN_3241979	TMEM179B
1043	1e-07	1.25e-06	0.178571	97.94	364.79	0.27	ILMN_2233366	ASAP1
1120	1e-07	1.25e-06	0.178571	92.32	347.17	0.27	ILMN_2332990	DIABLO
1236	1e-07	1.25e-06	0.178571	91.14	341.41	0.27	ILMN_2135339	C3orf70
1250	1e-07	1.25e-06	0.178571	90.01	332.98	0.27	ILMN_2396410	CS
867	< 1e-07	< 1e-07	0.178571	90.51	325.48	0.28	ILMN_2158705	ACYP2
959	< 1e-07	< 1e-07	0.178571	91.16	327.06	0.28	ILMN_1651557	KDELC2
998	1e-07	1.25e-06	0.178571	94.78	332.88	0.28	ILMN_3307892	PARVA
1081	1e-07	1.25e-06	0.178571	99.19	359.88	0.28	ILMN_1773741	GOLGA5
1189	1e-07	1.25e-06	0.178571	90.57	328.96	0.28	ILMN_1798957	C12orf47
335	< 1e-07	< 1e-07	0.178571	90.84	318.38	0.29	ILMN_1753393	OSGEP
421	< 1e-07	< 1e-07	0.178571	107.46	374.77	0.29	ILMN_1792951	ZHX2
463	< 1e-07	< 1e-07	0.178571	92.98	319.88	0.29	ILMN_1790575	METTL13
657	< 1e-07	< 1e-07	0.178571	89.16	312.64	0.29	ILMN_1771688	RAB7B
937	< 1e-07	< 1e-07	0.178571	99.71	339.86	0.29	ILMN_1790781	DHRS13
1094	1e-07	1.25e-06	0.178571	91.83	317.67	0.29	ILMN_1709486	SRPX
1110	1e-07	1.25e-06	0.178571	87.89	305.63	0.29	ILMN_1683576	MAGED2
1139	1e-07	1.25e-06	0.178571	104.05	359.98	0.29	ILMN_1717765	NUDT11
119	< 1e-07	< 1e-07	0.178571	90.41	304.81	0.3	ILMN_1718271	MTIF3
160	< 1e-07	< 1e-07	0.178571	86.01	283.29	0.3	ILMN_2289093	KIAA1618
453	< 1e-07	< 1e-07	0.178571	89.11	292.48	0.3	ILMN_1700024	UST
547	< 1e-07	< 1e-07	0.178571	92.04	301.78	0.3	ILMN_1736828	CHST10
612	< 1e-07	< 1e-07	0.178571	105	350.24	0.3	ILMN_3251445	MED27
632	< 1e-07	< 1e-07	0.178571	87.78	294.94	0.3	ILMN_1791896	EBAG9
679	< 1e-07	< 1e-07	0.178571	88.5	292.77	0.3	ILMN_2402168	EXOSC10
733	< 1e-07	< 1e-07	0.178571	112.63	378.82	0.3	ILMN_1674941	ANO6
773	< 1e-07	< 1e-07	0.178571	97.83	328.64	0.3	ILMN_3234081	LOC100129076
827	< 1e-07	< 1e-07	0.178571	93.37	315.68	0.3	ILMN_2054019	ISG15
892	< 1e-07	< 1e-07	0.178571	90.83	304.64	0.3	ILMN_1697491	FLJ14213
994	1e-07	1.25e-06	0.178571	91.67	306.19	0.3	ILMN_1788095	SPRYD3
1144	1e-07	1.25e-06	0.178571	87.56	294.48	0.3	ILMN_1731137	TXNDC9
598	< 1e-07	< 1e-07	0.178571	101.64	332.54	0.31	ILMN_1801387	YEATS4
685	< 1e-07	< 1e-07	0.178571	93.15	301.56	0.31	ILMN_1785926	ZNF621
687	< 1e-07	< 1e-07	0.178571	87.33	283.26	0.31	ILMN_2288070	FTO
761	< 1e-07	< 1e-07	0.178571	90.79	293.67	0.31	ILMN_1660635	LACTB2
839	< 1e-07	< 1e-07	0.178571	86.34	279.02	0.31	ILMN_1704055	HSPC111
859	< 1e-07	< 1e-07	0.178571	104.14	332.69	0.31	ILMN_1795836	C21orf57
910	< 1e-07	< 1e-07	0.178571	91.52	292.03	0.31	ILMN_1702247	CCNDBP1
980	1e-07	1.25e-06	0.178571	90.11	291.12	0.31	ILMN_1665066	C4orf14
1078	1e-07	1.25e-06	0.178571	103.65	336.97	0.31	ILMN_2068747	OAT
1152	1e-07	1.25e-06	0.178571	90.71	291.65	0.31	ILMN_2362457	ZDHHC16
1182	1e-07	1.25e-06	0.178571	99.05	322.82	0.31	ILMN_1761247	PIR
462	< 1e-07	< 1e-07	0.178571	89.19	279.29	0.32	ILMN_1782129	ZBED4
534	< 1e-07	< 1e-07	0.178571	94.41	294.64	0.32	ILMN_2381841	DDX19B
559	< 1e-07	< 1e-07	0.178571	87.84	274.44	0.32	ILMN_1721758	ID4
678	< 1e-07	< 1e-07	0.178571	93.17	288.43	0.32	ILMN_1729180	GATM
754	< 1e-07	< 1e-07	0.178571	88.2	275.05	0.32	ILMN_1708029	C9orf127
895	< 1e-07	< 1e-07	0.178571	98.2	311.43	0.32	ILMN_1753515	SRR
995	1e-07	1.25e-06	0.178571	94.71	297.57	0.32	ILMN_2392356	CTPS2
1088	1e-07	1.25e-06	0.178571	87.54	274.23	0.32	ILMN_2215631	OTUD6B
1153	1e-07	1.25e-06	0.178571	90.95	281.58	0.32	ILMN_1672042	DOLPP1
836	< 1e-07	< 1e-07	0.178571	107.79	329.22	0.33	ILMN_3240177	LLPH
880	< 1e-07	< 1e-07	0.178571	100.79	306.66	0.33	ILMN_3298694	TYW1B
264	< 1e-07	< 1e-07	0.178571	85.82	251.61	0.34	ILMN_1676899	YEATS2
614	< 1e-07	< 1e-07	0.178571	91.68	270.51	0.34	ILMN_1788250	LDOC1
830	< 1e-07	< 1e-07	0.178571	89.14	261.07	0.34	ILMN_1695246	KLHDC8B
974	< 1e-07	< 1e-07	0.178571	109.27	319.34	0.34	ILMN_1789171	EEF2K
1031	1e-07	1.25e-06	0.178571	93.22	275.52	0.34	ILMN_1736481	SECISBP2
1040	1e-07	1.25e-06	0.178571	91.16	265.81	0.34	ILMN_1737857	GTF2B
1205	1e-07	1.25e-06	0.178571	89.24	264.4	0.34	ILMN_2407434	DCLK2
472	< 1e-07	< 1e-07	0.178571	91.38	259.85	0.35	ILMN_1763144	NEU1
675	< 1e-07	< 1e-07	0.178571	91.29	264.35	0.35	ILMN_1733690	AKAP7
749	< 1e-07	< 1e-07	0.178571	101.18	288.53	0.35	ILMN_2306066	FUS
862	< 1e-07	< 1e-07	0.178571	92.43	265.54	0.35	ILMN_1796762	CCDC102A
953	< 1e-07	< 1e-07	0.178571	104.85	297.51	0.35	ILMN_1655635	METTL3
1137	1e-07	1.25e-06	0.178571	97.23	274.44	0.35	ILMN_2249288	TIPRL
191	< 1e-07	< 1e-07	0.178571	88.75	247.95	0.36	ILMN_1788538	NCALD
584	< 1e-07	< 1e-07	0.178571	103.64	286.82	0.36	ILMN_1788254	PGAM5
269	< 1e-07	< 1e-07	0.178571	99.24	266.94	0.37	ILMN_1718285	HOXC8
961	< 1e-07	< 1e-07	0.178571	90.26	244.26	0.37	ILMN_1698019	LGMN
1066	1e-07	1.25e-06	0.178571	90.53	243.41	0.37	ILMN_1683415	CAMK2D
1115	1e-07	1.25e-06	0.178571	86.06	230.86	0.37	ILMN_1690546	PPP3CC
1032	1e-07	1.25e-06	0.178571	92.89	246.47	0.38	ILMN_1807304	MBNL1
1230	1e-07	1.25e-06	0.178571	93.07	242.62	0.38	ILMN_2360307	SUSD4
557	< 1e-07	< 1e-07	0.178571	98.88	251.75	0.39	ILMN_1813625	TRIM25
1158	1e-07	1.25e-06	0.178571	96.36	246.88	0.39	ILMN_1670925	CYB5D1
854	< 1e-07	< 1e-07	0.178571	89.49	222.87	0.4	ILMN_1708946	VPS4A
581	< 1e-07	< 1e-07	0.178571	84.61	206.87	0.41	ILMN_1676423	CCNC
991	1e-07	1.25e-06	0.178571	91.99	221.93	0.41	ILMN_1733932	SNUPN
988	1e-07	1.25e-06	0.178571	91.95	215.63	0.43	ILMN_3278132	LOC440487
1015	1e-07	1.25e-06	0.178571	89.41	204.75	0.44	ILMN_2136177	CNOT6
361	< 1e-07	< 1e-07	0.178571	93.17	206.87	0.45	ILMN_1662686	USPL1
582	< 1e-07	< 1e-07	0.178571	92.26	202.9	0.45	ILMN_1743352	TBCC
1112	1e-07	1.25e-06	0.178571	90.25	199.75	0.45	ILMN_2179397	TATDN1
608	< 1e-07	< 1e-07	0.178571	90.51	192.08	0.47	ILMN_2147114	PSPH
818	< 1e-07	< 1e-07	0.178571	98.4	209.74	0.47	ILMN_1742935	ZNF33B
374	< 1e-07	< 1e-07	0.178571	95.6	199.39	0.48	ILMN_1664761	TMEM138
599	< 1e-07	< 1e-07	0.178571	101.17	210.67	0.48	ILMN_2339705	MED8
989	1e-07	1.25e-06	0.178571	87.3	181.91	0.48	ILMN_1789909	TBC1D9B
1229	1e-07	1.25e-06	0.178571	92.28	191.76	0.48	ILMN_1811702	GRN
1231	1e-07	1.25e-06	0.178571	90.49	189	0.48	ILMN_2214197	TP53INP1
723	< 1e-07	< 1e-07	0.178571	91.87	189.05	0.49	ILMN_1697286	SF3A1
794	< 1e-07	< 1e-07	0.178571	88.76	179.6	0.49	ILMN_1809963	RSAD1
